# Supplementary material for: A New Strategy for High-Efficient Tandem Enrichment and Simultaneous Profiling of N-Glycopeptides and Phosphopeptides in Lung Cancer Tissue
Source: Front Mol Biosci. 2022 May 24;9:923363. doi: 10.3389/fmolb.2022.923363 (PMC9171396; doi:10.3389/fmolb.2022.923363)
Supplement: Supplementary file 3 [file Table9.XLSX]

## Sheet: Description
Supplementary Table 9. Quantitative differential analysis and GO analysis of N-glycopeptides from lung cancer and normal tissue
Quantitative differential analysis and GO analysis of N-glycopeptides from lung cancer and normal tissue

## Sheet: differential analysis
Significant	-Log(P-value)	Difference	Peptide	Glycans	Modification Type(s)	Protein Name	Symbol color	Symbol type	Symbol size	Show label	Cancer 1	Cancer 2	Cancer 3	Normal 1	Normal 2	Normal 3
	1.75129	-1.58235	K.AAEDWTENPEPFN[+1864.634]ASFYR.R	HexNAc(2)Hex(9)	N[+1865]	>sp|Q9NY47|CA2D2_HUMAN Voltage-dependent calcium channel subunit alpha-2/delta-2 OS=Homo sapiens OX=9606 GN=CACNA2D2 PE=1 SV=2	Color2 [DarkGray]	1	4		19.0553	18.8634	19.5728	21.4406	20.4264	20.3715
	1.83016	-2.08261	K.AAEDWTENPEPFN[+2026.687]ASFYR.R	HexNAc(2)Hex(10)	N[+2027]	>sp|Q9NY47|CA2D2_HUMAN Voltage-dependent calcium channel subunit alpha-2/delta-2 OS=Homo sapiens OX=9606 GN=CACNA2D2 PE=1 SV=2	Color2 [DarkGray]	1	4		19.4619	19.2112	19.0841	22.1285	20.4256	21.451
	0.152924	0.889756	K.AAIPSALDTN[+1540.529]SSK.S	HexNAc(2)Hex(7)	N[+1541]	>sp|Q08380|LG3BP_HUMAN Galectin-3-binding protein OS=Homo sapiens OX=9606 GN=LGALS3BP PE=1 SV=1	Color2 [DarkGray]	1	4		19.871	18.4389	25.5205	20.5198	20.6878	19.9535
	0.581851	2.91337	K.AAIPSALDTN[+1702.581]SSK.S	HexNAc(2)Hex(8)	N[+1703]	>sp|Q08380|LG3BP_HUMAN Galectin-3-binding protein OS=Homo sapiens OX=9606 GN=LGALS3BP PE=1 SV=1	Color2 [DarkGray]	1	4		18.0602	24.1303	25.2183	19.5699	19.8218	19.277
+	2.01004	5.38262	K.AAIPSALDTN[+1864.634]SSK.S	HexNAc(2)Hex(9)	N[+1865]	>sp|Q08380|LG3BP_HUMAN Galectin-3-binding protein OS=Homo sapiens OX=9606 GN=LGALS3BP PE=1 SV=1	Color2 [DarkGray]	1	4		25.7516	24.3727	25.9256	18.6702	22.0513	19.1804
	0.0595848	0.0904401	K.AAIPSALDTN[+2789.999]SSK.S	HexNAc(6)Hex(7)Fuc(1)NeuAc(1)	N[+2790]	>sp|Q08380|LG3BP_HUMAN Galectin-3-binding protein OS=Homo sapiens OX=9606 GN=LGALS3BP PE=1 SV=1	Color2 [DarkGray]	1	4		18.9306	20.1848	19.7074	19.4352	18.9072	20.2092
	0.924507	1.68546	K.AALAAFNAQNN[+1913.677]GSNFQLEEISR.A	HexNAc(4)Hex(5)NeuAc(1)	N[+1914]	>sp|P02765|FETUA_HUMAN Alpha-2-HS-glycoprotein OS=Homo sapiens OX=9606 GN=AHSG PE=1 SV=2	Color2 [DarkGray]	1	4		25.9704	26.2807	26.4251	25.3995	25.3627	22.8577
	1.1221	3.56643	K.AALAAFNAQNN[+2204.772]GSNFQLEEISR.A	HexNAc(4)Hex(5)NeuAc(2)	N[+2205]	>sp|P02765|FETUA_HUMAN Alpha-2-HS-glycoprotein OS=Homo sapiens OX=9606 GN=AHSG PE=1 SV=2	Color2 [DarkGray]	1	4		28.8036	28.6037	28.6557	26.8463	26.3705	22.1469
	0.00738003	-0.0109704	K.AALAAFNAQNN[+2221.788]GSNFQLEEISR.A	HexNAc(4)Hex(6)Fuc(1)NeuAc(1)	N[+2222]	>sp|P02765|FETUA_HUMAN Alpha-2-HS-glycoprotein OS=Homo sapiens OX=9606 GN=AHSG PE=1 SV=2	Color2 [DarkGray]	1	4		19.9523	19.5873	21.019	20.2535	20.5683	19.7699
	0.784787	1.30733	K.AALAAFNAQNN[+2350.830]GSNFQLEEISR.A	HexNAc(4)Hex(5)Fuc(1)NeuAc(2)	N[+2351]	>sp|P02765|FETUA_HUMAN Alpha-2-HS-glycoprotein OS=Homo sapiens OX=9606 GN=AHSG PE=1 SV=2	Color2 [DarkGray]	1	4		22.3129	24.3897	24.7913	22.4869	22.5053	22.5798
	0.695844	1.25448	K.AALAAFNAQNN[+2352.846]GSNFQLEEISR.A	HexNAc(6)Hex(7)	N[+2353]	>sp|P02765|FETUA_HUMAN Alpha-2-HS-glycoprotein OS=Homo sapiens OX=9606 GN=AHSG PE=1 SV=2	Color2 [DarkGray]	1	4		21.9847	19.7021	19.5523	18.8653	18.9862	19.6241
	2.74723	1.8054	K.AALAAFNAQNN[+2569.905]GSNFQLEEISR.A	HexNAc(5)Hex(6)NeuAc(2)	N[+2570]	>sp|P02765|FETUA_HUMAN Alpha-2-HS-glycoprotein OS=Homo sapiens OX=9606 GN=AHSG PE=1 SV=2	Color2 [DarkGray]	1	4		20.6205	20.8671	20.9236	18.5744	19.3459	19.0747
+	3.74073	5.16043	K.AALAAFNAQNN[+2861.000]GSNFQLEEISR.A	HexNAc(5)Hex(6)NeuAc(3)	N[+2861]	>sp|P02765|FETUA_HUMAN Alpha-2-HS-glycoprotein OS=Homo sapiens OX=9606 GN=AHSG PE=1 SV=2	Color2 [DarkGray]	1	4		23.9464	23.4174	23.3155	18.0268	18.1071	19.0642
+	3.15691	2.55311	K.AALAAFNAQNN[+3007.058]GSNFQLEEISR.A	HexNAc(5)Hex(6)Fuc(1)NeuAc(3)	N[+3007]	>sp|P02765|FETUA_HUMAN Alpha-2-HS-glycoprotein OS=Homo sapiens OX=9606 GN=AHSG PE=1 SV=2	Color2 [DarkGray]	1	4		22.2259	22.1276	21.9862	19.1403	19.5021	20.038
	0.18001	-0.561782	K.AAQKAAAFEEQEN[+2921.058]ETVVVK.E	HexNAc(8)Hex(8)	N[+2921]	>sp|Q9Y490|TLN1_HUMAN Talin-1 OS=Homo sapiens OX=9606 GN=TLN1 PE=1 SV=3	Color2 [DarkGray]	1	4		19.5458	19.3041	19.4368	20.1714	17.854	21.9467
	0.0157312	0.067866	K.ADQQGKPHC[+57.021]VC[+57.021]QDPVTC[+57.021]PPTKPLDQVC[+57.021]GTDN[+2059.735]QTYASSC[+57.021]HLFATK.C	HexNAc(4)Hex(5)Fuc(1)NeuAc(1)	C[+57]*5, N[+2060]	>sp|Q14515|SPRL1_HUMAN SPARC-like protein 1 OS=Homo sapiens OX=9606 GN=SPARCL1 PE=1 SV=2	Color2 [DarkGray]	1	4		20.1697	18.4483	20.8282	18.537	18.4748	22.2307
	0.147397	-0.960636	K.ADTHDEILEGLNFN[+2204.772]LTEIPEAQIHEGFQELLR.T	HexNAc(4)Hex(5)NeuAc(2)	N[+2205]	>sp|P01009|A1AT_HUMAN Alpha-1-antitrypsin OS=Homo sapiens OX=9606 GN=SERPINA1 PE=1 SV=3	Color2 [DarkGray]	1	4		23.3312	18.569	19.9125	19.4168	25.4937	19.784
	0.167993	0.659196	K.AEN[+2059.735]GTC[+57.021]IDIDEC[+57.021]KDGTHQC[+57.021]R.Y	HexNAc(4)Hex(5)Fuc(1)NeuAc(1)	C[+57]*3, N[+2060]	>sp|Q96RW7|HMCN1_HUMAN Hemicentin-1 OS=Homo sapiens OX=9606 GN=HMCN1 PE=1 SV=2	Color2 [DarkGray]	1	4		18.7318	22.8688	19.0569	20.5038	18.3022	19.8739
+	2.06179	5.54706	K.AEPGTHLC[+57.021]IDVEDAMN[+1864.634]ITR.K	HexNAc(2)Hex(9)	C[+57], N[+1865]	>sp|Q86WC4|OSTM1_HUMAN Osteopetrosis-associated transmembrane protein 1 OS=Homo sapiens OX=9606 GN=OSTM1 PE=1 SV=1	Color2 [DarkGray]	1	4		25.5932	25.3908	22.169	19.4878	18.5829	18.4411
	0.330213	-0.830399	K.AFEN[+1403.507]VTDLQWLILDHNLLENSK.I	HexNAc(3)Hex(4)Fuc(1)	N[+1404]	>sp|P51884|LUM_HUMAN Lumican OS=Homo sapiens OX=9606 GN=LUM PE=1 SV=2	Color2 [DarkGray]	1	4		18.7592	20.4769	18.7192	18.5982	21.5615	20.2867
+	4.74628	7.28894	K.AFEN[+1702.581]VTDLQWLILDHNLLENSK.I	HexNAc(2)Hex(8)	N[+1703]	>sp|P51884|LUM_HUMAN Lumican OS=Homo sapiens OX=9606 GN=LUM PE=1 SV=2	Color2 [DarkGray]	1	4		26.3752	27.1717	27.1331	19.4948	19.9169	19.4014
	1.0138	4.3726	K.AFEN[+1864.634]VTDLQWLILDHNLLENSK.I	HexNAc(2)Hex(9)	N[+1865]	>sp|P51884|LUM_HUMAN Lumican OS=Homo sapiens OX=9606 GN=LUM PE=1 SV=2	Color2 [DarkGray]	1	4		19.7803	25.6792	25.5643	19.3506	20.2331	18.3224
+	2.54172	-6.82684	K.AFEN[+2059.735]VTDLQWLILDHNLLENSK.I	HexNAc(4)Hex(5)Fuc(1)NeuAc(1)	N[+2060]	>sp|P51884|LUM_HUMAN Lumican OS=Homo sapiens OX=9606 GN=LUM PE=1 SV=2	Color2 [DarkGray]	1	4		19.4965	18.4953	19.4864	24.0781	27.4273	26.4533
	0.445852	-1.71203	K.AFEN[+2133.772]VTDLQWLILDHNLLENSK.I	HexNAc(5)Hex(6)Fuc(1)	N[+2134]	>sp|P51884|LUM_HUMAN Lumican OS=Homo sapiens OX=9606 GN=LUM PE=1 SV=2	Color2 [DarkGray]	1	4		17.9939	19.4806	20.2701	19.9706	18.9845	23.9255
	0.476639	-1.36096	K.AFEN[+2262.814]VTDLQWLILDHNLLENSK.I	HexNAc(5)Hex(5)Fuc(1)NeuAc(1)	N[+2263]	>sp|P51884|LUM_HUMAN Lumican OS=Homo sapiens OX=9606 GN=LUM PE=1 SV=2	Color2 [DarkGray]	1	4		18.6644	19.1584	19.7591	22.7719	20.2332	18.6597
	0.764335	-3.96194	K.AFEN[+2350.830]VTDLQWLILDHNLLENSK.I	HexNAc(4)Hex(5)Fuc(1)NeuAc(2)	N[+2351]	>sp|P51884|LUM_HUMAN Lumican OS=Homo sapiens OX=9606 GN=LUM PE=1 SV=2	Color2 [DarkGray]	1	4		25.5138	26.6559	19.0372	28.1727	27.5914	27.3286
	0.0916303	0.219678	K.AFEN[+2352.846]VTDLQWLILDHNLLENSK.I	HexNAc(6)Hex(7)	N[+2353]	>sp|P51884|LUM_HUMAN Lumican OS=Homo sapiens OX=9606 GN=LUM PE=1 SV=2	Color2 [DarkGray]	1	4		21.1159	19.2948	18.6765	19.603	20.1675	18.6576
	0.519769	-1.17121	K.AFEN[+2391.857]VTDLQWLILDHNLLENSK.I	HexNAc(5)Hex(4)Fuc(1)NeuAc(2)	N[+2392]	>sp|P51884|LUM_HUMAN Lumican OS=Homo sapiens OX=9606 GN=LUM PE=1 SV=2	Color2 [DarkGray]	1	4		19.6411	18.6122	19.9415	18.7802	21.2381	21.6901
	0.27343	-0.992635	K.AFEN[+2407.852]VTDLQWLILDHNLLENSK.I	HexNAc(5)Hex(5)NeuAc(2)	N[+2408]	>sp|P51884|LUM_HUMAN Lumican OS=Homo sapiens OX=9606 GN=LUM PE=1 SV=2	Color2 [DarkGray]	1	4		19.1341	20.2204	20.7689	20.2762	23.7009	19.1242
	0.321639	-1.87408	K.AFEN[+2424.867]VTDLQWLILDHNLLENSK.I	HexNAc(5)Hex(6)Fuc(1)NeuAc(1)	N[+2425]	>sp|P51884|LUM_HUMAN Lumican OS=Homo sapiens OX=9606 GN=LUM PE=1 SV=2	Color2 [DarkGray]	1	4		23.0778	19.23	19.6228	19.4128	26.3994	21.7405
	0.876775	-2.60819	K.AFEN[+2498.904]VTDLQWLILDHNLLENSK.I	HexNAc(6)Hex(7)Fuc(1)	N[+2499]	>sp|P51884|LUM_HUMAN Lumican OS=Homo sapiens OX=9606 GN=LUM PE=1 SV=2	Color2 [DarkGray]	1	4		20.1423	17.6444	19.7314	21.9643	23.6731	19.7052
	0.477368	0.653552	K.AFEN[+2627.947]VTDLQWLILDHNLLENSK.I	HexNAc(6)Hex(6)Fuc(1)NeuAc(1)	N[+2628]	>sp|P51884|LUM_HUMAN Lumican OS=Homo sapiens OX=9606 GN=LUM PE=1 SV=2	Color2 [DarkGray]	1	4		19.3522	19.8841	21.3135	19.4418	19.7306	19.4166
	0.37387	-0.519995	K.AFEN[+2643.941]VTDLQWLILDHNLLENSK.I	HexNAc(6)Hex(7)NeuAc(1)	N[+2644]	>sp|P51884|LUM_HUMAN Lumican OS=Homo sapiens OX=9606 GN=LUM PE=1 SV=2	Color2 [DarkGray]	1	4		19.4694	18.97	20.5977	19.5879	20.2949	20.7143
	0.477672	-0.866968	K.AFEN[+2715.963]VTDLQWLILDHNLLENSK.I	HexNAc(5)Hex(6)Fuc(1)NeuAc(2)	N[+2716]	>sp|P51884|LUM_HUMAN Lumican OS=Homo sapiens OX=9606 GN=LUM PE=1 SV=2	Color2 [DarkGray]	1	4		26.4673	28.746	27.1306	27.5682	28.9533	28.4233
	0.26122	-0.653879	K.AFEN[+2717.978]VTDLQWLILDHNLLENSK.I	HexNAc(7)Hex(8)	N[+2718]	>sp|P51884|LUM_HUMAN Lumican OS=Homo sapiens OX=9606 GN=LUM PE=1 SV=2	Color2 [DarkGray]	1	4		20.3721	18.5124	18.7663	21.4738	18.8641	19.2744
+	2.68982	-3.28611	K.AFEN[+2789.999]VTDLQWLILDHNLLENSK.I	HexNAc(6)Hex(7)Fuc(1)NeuAc(1)	N[+2790]	>sp|P51884|LUM_HUMAN Lumican OS=Homo sapiens OX=9606 GN=LUM PE=1 SV=2	Color2 [DarkGray]	1	4		22.0247	22.7035	22.8574	25.0582	26.2987	26.087
	1.62993	-1.26492	K.AFEN[+2864.036]VTDLQWLILDHNLLENSK.I	HexNAc(7)Hex(8)Fuc(1)	N[+2864]	>sp|P51884|LUM_HUMAN Lumican OS=Homo sapiens OX=9606 GN=LUM PE=1 SV=2	Color2 [DarkGray]	1	4		19.4386	19.8669	19.242	20.5676	20.3963	21.3785
	0.889126	2.75041	K.AFEN[+2919.042]VTDLQWLILDHNLLENSK.I	HexNAc(6)Hex(6)Fuc(1)NeuAc(2)	N[+2919]	>sp|P51884|LUM_HUMAN Lumican OS=Homo sapiens OX=9606 GN=LUM PE=1 SV=2	Color2 [DarkGray]	1	4		19.3259	23.3259	23.0168	18.1156	20.3557	18.946
	0.758876	-3.88272	K.AFEN[+3081.095]VTDLQWLILDHNLLENSK.I	HexNAc(6)Hex(7)Fuc(1)NeuAc(2)	N[+3081]	>sp|P51884|LUM_HUMAN Lumican OS=Homo sapiens OX=9606 GN=LUM PE=1 SV=2	Color2 [DarkGray]	1	4		19.7513	18.6535	19.4857	18.525	25.3332	25.6804
	0.444337	-0.391502	K.AFEN[+3083.110]VTDLQWLILDHNLLENSK.I	HexNAc(8)Hex(9)	N[+3083]	>sp|P51884|LUM_HUMAN Lumican OS=Homo sapiens OX=9606 GN=LUM PE=1 SV=2	Color2 [DarkGray]	1	4		19.4042	18.4703	19.2671	19.5178	18.9857	19.8126
	0.281247	-1.60232	K.AFEN[+3446.227]VTDLQWLILDHNLLENSK.I	HexNAc(7)Hex(8)Fuc(1)NeuAc(2)	N[+3446]	>sp|P51884|LUM_HUMAN Lumican OS=Homo sapiens OX=9606 GN=LUM PE=1 SV=2	Color2 [DarkGray]	1	4		18.7824	19.2916	19.711	18.2592	18.9294	25.4034
+	3.53404	-3.22234	K.AFN[+2059.735]STLPTMAQMEK.A	HexNAc(4)Hex(5)Fuc(1)NeuAc(1)	N[+2060]	>sp|P16070|CD44_HUMAN CD44 antigen OS=Homo sapiens OX=9606 GN=CD44 PE=1 SV=3	Color2 [DarkGray]	1	4		19.2014	19.6165	19.0095	22.3561	22.9026	22.2356
	0.298856	-0.88515	K.AFN[+2350.830]STLPTMAQMEK.A	HexNAc(4)Hex(5)Fuc(1)NeuAc(2)	N[+2351]	>sp|P16070|CD44_HUMAN CD44 antigen OS=Homo sapiens OX=9606 GN=CD44 PE=1 SV=3	Color2 [DarkGray]	1	4		22.107	25.6038	25.689	25.6373	24.8938	25.5241
	1.02466	2.61714	K.AFN[+2352.846]STLPTMAQMEK.A	HexNAc(6)Hex(7)	N[+2353]	>sp|P16070|CD44_HUMAN CD44 antigen OS=Homo sapiens OX=9606 GN=CD44 PE=1 SV=3	Color2 [DarkGray]	1	4		21.8401	22.8639	19.2803	18.4801	17.8953	19.7574
	0.175592	0.516575	K.AFN[+2553.910]STLPTMAQMEK.A	HexNAc(5)Hex(5)Fuc(1)NeuAc(2)	N[+2554]	>sp|P16070|CD44_HUMAN CD44 antigen OS=Homo sapiens OX=9606 GN=CD44 PE=1 SV=3	Color2 [DarkGray]	1	4		21.1961	21.5085	18.0584	19.3862	19.8867	19.9403
	0.131675	-0.235042	K.AGFEYAFDQLQNSN[+1702.581]ITR.A	HexNAc(2)Hex(8)	N[+1703]	>sp|Q9NY47|CA2D2_HUMAN Voltage-dependent calcium channel subunit alpha-2/delta-2 OS=Homo sapiens OX=9606 GN=CACNA2D2 PE=1 SV=2	Color2 [DarkGray]	1	4		19.9113	19.118	18.8867	20.1772	20.0589	18.385
	0.602143	1.92243	K.AGKPSAAAASVSTQHGSILQLN[+1378.476]DTLEEK.E	HexNAc(2)Hex(6)	N[+1378]	>sp|Q68CP4|HGNAT_HUMAN Heparan-alpha-glucosaminide N-acetyltransferase OS=Homo sapiens OX=9606 GN=HGSNAT PE=1 SV=2	Color2 [DarkGray]	1	4		22.802	19.9	22.5426	21.8271	18.0834	19.5667
	1.20866	0.939589	K.AGLQAFFQVQEC[+57.021]N[+1702.581]K.S	HexNAc(2)Hex(8)	C[+57], N[+1703]	>sp|P00450|CERU_HUMAN Ceruloplasmin OS=Homo sapiens OX=9606 GN=CP PE=1 SV=1	Color2 [DarkGray]	1	4		19.4443	20.4749	20.2605	19.3973	18.7648	19.1988
	0.291407	-1.46792	K.AGLQAFFQVQEC[+57.021]N[+1913.677]K.S	HexNAc(4)Hex(5)NeuAc(1)	C[+57], N[+1914]	>sp|P00450|CERU_HUMAN Ceruloplasmin OS=Homo sapiens OX=9606 GN=CP PE=1 SV=1	Color2 [DarkGray]	1	4		19.4461	21.6257	19.6837	18.9641	25.4075	20.7877
	0.0171346	0.0694669	K.AGLQAFFQVQEC[+57.021]N[+2059.735]K.S	HexNAc(4)Hex(5)Fuc(1)NeuAc(1)	C[+57], N[+2060]	>sp|P00450|CERU_HUMAN Ceruloplasmin OS=Homo sapiens OX=9606 GN=CP PE=1 SV=1	Color2 [DarkGray]	1	4		19.187	18.6468	22.9262	20.1092	20.22	20.2224
	0.856119	2.12935	K.AGLQAFFQVQEC[+57.021]N[+2100.761]K.S	HexNAc(5)Hex(4)Fuc(1)NeuAc(1)	C[+57], N[+2101]	>sp|P00450|CERU_HUMAN Ceruloplasmin OS=Homo sapiens OX=9606 GN=CP PE=1 SV=1	Color2 [DarkGray]	1	4		23.1441	19.7612	22.6931	19.4363	20.6403	19.1338
	0.126394	-0.3035	K.AGLQAFFQVQEC[+57.021]N[+2204.772]K.S	HexNAc(4)Hex(5)NeuAc(2)	C[+57], N[+2205]	>sp|P00450|CERU_HUMAN Ceruloplasmin OS=Homo sapiens OX=9606 GN=CP PE=1 SV=1	Color2 [DarkGray]	1	4		25.7815	26.4573	27.0126	26.4387	28.2337	25.4897
	1.32462	3.47341	K.AGLQAFFQVQEC[+57.021]N[+2350.830]K.S	HexNAc(4)Hex(5)Fuc(1)NeuAc(2)	C[+57], N[+2351]	>sp|P00450|CERU_HUMAN Ceruloplasmin OS=Homo sapiens OX=9606 GN=CP PE=1 SV=1	Color2 [DarkGray]	1	4		23.7093	20.9181	25.045	19.5559	19.6093	20.087
	0.791355	3.10434	K.AGLQAFFQVQEC[+57.021]N[+2391.857]K.S	HexNAc(5)Hex(4)Fuc(1)NeuAc(2)	C[+57], N[+2392]	>sp|P00450|CERU_HUMAN Ceruloplasmin OS=Homo sapiens OX=9606 GN=CP PE=1 SV=1	Color2 [DarkGray]	1	4		18.2505	23.6164	22.9107	17.2841	19.5921	18.5883
	0.481961	1.28246	K.AGLQAFFQVQEC[+57.021]N[+2393.873]K.S	HexNAc(7)Hex(6)	C[+57], N[+2394]	>sp|P00450|CERU_HUMAN Ceruloplasmin OS=Homo sapiens OX=9606 GN=CP PE=1 SV=1	Color2 [DarkGray]	1	4		20.026	19.0748	22.9107	19.5345	19.3936	19.236
	1.65896	2.43159	K.AGYFN[+1378.476]FTSATITYLAQEDGPVVIGSTSAPGQGGILAQR.E	HexNAc(2)Hex(6)	N[+1378]	>sp|P43308|SSRB_HUMAN Translocon-associated protein subunit beta OS=Homo sapiens OX=9606 GN=SSR2 PE=1 SV=1	Color2 [DarkGray]	1	4		22.5933	21.1531	21.8849	19.6313	20.2431	18.4621
	0.562403	0.882746	K.AGYFN[+1444.534]FTSATITYLAQEDGPVVIGSTSAPGQGGILAQR.E	HexNAc(4)Hex(3)Fuc(1)	N[+1445]	>sp|P43308|SSRB_HUMAN Translocon-associated protein subunit beta OS=Homo sapiens OX=9606 GN=SSR2 PE=1 SV=1	Color2 [DarkGray]	1	4		20.5873	19.5125	20.7761	18.9509	20.5517	18.7251
+	2.41492	5.47492	K.AGYFN[+1540.529]FTSATITYLAQEDGPVVIGSTSAPGQGGILAQR.E	HexNAc(2)Hex(7)	N[+1541]	>sp|P43308|SSRB_HUMAN Translocon-associated protein subunit beta OS=Homo sapiens OX=9606 GN=SSR2 PE=1 SV=1	Color2 [DarkGray]	1	4		23.2218	25.7667	25.4966	19.2052	20.1451	18.7101
+	4.0149	2.96925	K.AGYFN[+1702.581]FTSATITYLAQEDGPVVIGSTSAPGQGGILAQR.E	HexNAc(2)Hex(8)	N[+1703]	>sp|P43308|SSRB_HUMAN Translocon-associated protein subunit beta OS=Homo sapiens OX=9606 GN=SSR2 PE=1 SV=1	Color2 [DarkGray]	1	4		22.8197	22.9965	22.8041	19.5606	20.1633	19.9887
	0.174724	0.629854	K.AIIQGLM[+15.995]PDQN[+2059.735]YTVQIIAYNK.D	HexNAc(4)Hex(5)Fuc(1)NeuAc(1)	M[+16], N[+2060]	>sp|Q05707|COEA1_HUMAN Collagen alpha-1(XIV) chain OS=Homo sapiens OX=9606 GN=COL14A1 PE=1 SV=3	Color2 [DarkGray]	1	4		19.5811	22.8875	18.4099	19.9355	19.9179	19.1355
	0.797748	-1.8121	K.AIIQGLMPDQN[+1768.640]YTVQIIAYNK.D	HexNAc(4)Hex(5)Fuc(1)	N[+1769]	>sp|Q05707|COEA1_HUMAN Collagen alpha-1(XIV) chain OS=Homo sapiens OX=9606 GN=COL14A1 PE=1 SV=3	Color2 [DarkGray]	1	4		18.9519	18.5653	18.7042	19.1927	22.6033	19.8617
	1.09498	-3.91733	K.AIIQGLMPDQN[+1768.640]YTVQIIAYNKDK.E	HexNAc(4)Hex(5)Fuc(1)	N[+1769]	>sp|Q05707|COEA1_HUMAN Collagen alpha-1(XIV) chain OS=Homo sapiens OX=9606 GN=COL14A1 PE=1 SV=3	Color2 [DarkGray]	1	4		19.1416	18.3644	19.1757	19.5042	24.7403	24.1891
	1.01349	2.71849	K.AIIQGLMPDQN[+2059.735]YTVQIIAYNK.D	HexNAc(4)Hex(5)Fuc(1)NeuAc(1)	N[+2060]	>sp|Q05707|COEA1_HUMAN Collagen alpha-1(XIV) chain OS=Homo sapiens OX=9606 GN=COL14A1 PE=1 SV=3	Color2 [DarkGray]	1	4		23.2784	23.5315	24.0223	21.0263	22.9693	18.681
	0.462612	-0.856474	K.AIIQGLMPDQN[+2059.735]YTVQIIAYNKDK.E	HexNAc(4)Hex(5)Fuc(1)NeuAc(1)	N[+2060]	>sp|Q05707|COEA1_HUMAN Collagen alpha-1(XIV) chain OS=Homo sapiens OX=9606 GN=COL14A1 PE=1 SV=3	Color2 [DarkGray]	1	4		18.0308	19.2494	18.7132	19.0122	20.9385	18.6122
	0.132252	0.325403	K.AIIQGLMPDQN[+2350.830]YTVQIIAYNK.D	HexNAc(4)Hex(5)Fuc(1)NeuAc(2)	N[+2351]	>sp|Q05707|COEA1_HUMAN Collagen alpha-1(XIV) chain OS=Homo sapiens OX=9606 GN=COL14A1 PE=1 SV=3	Color2 [DarkGray]	1	4		18.6008	21.2059	21.0467	20.4241	19.3204	20.1327
	0.58412	0.704366	K.AIN[+1540.529]QTAVEC[+57.021]TWTGPR.N	HexNAc(2)Hex(7)	C[+57], N[+1541]	>sp|Q92673|SORL_HUMAN Sortilin-related receptor OS=Homo sapiens OX=9606 GN=SORL1 PE=1 SV=2	Color2 [DarkGray]	1	4		20.7975	20.2109	19.3011	20.0009	18.9314	19.264
	2.87673	0.953398	K.AIN[+1702.581]QTAVEC[+57.021]TWTGPR.N	HexNAc(2)Hex(8)	C[+57], N[+1703]	>sp|Q92673|SORL_HUMAN Sortilin-related receptor OS=Homo sapiens OX=9606 GN=SORL1 PE=1 SV=2	Color2 [DarkGray]	1	4		19.9193	20.2223	20.2615	19.2817	19.1317	19.1297
	0.927808	1.24306	K.AIN[+1864.634]QTAVEC[+57.021]TWTGPR.N	HexNAc(2)Hex(9)	C[+57], N[+1865]	>sp|Q92673|SORL_HUMAN Sortilin-related receptor OS=Homo sapiens OX=9606 GN=SORL1 PE=1 SV=2	Color2 [DarkGray]	1	4		20.3878	20.6272	20.3799	18.3189	18.9353	20.4116
	1.37561	-1.36465	K.AINQGNYGWQAGN[+1216.423]HSAFWGMTLDEGIR.Y	HexNAc(2)Hex(5)	N[+1216]	>sp|Q9GZM7|TINAL_HUMAN Tubulointerstitial nephritis antigen-like OS=Homo sapiens OX=9606 GN=TINAGL1 PE=1 SV=1	Color2 [DarkGray]	1	4		20.3183	20.2789	18.9146	21.1435	21.1859	21.2763
	0.648511	-3.0689	K.AINQGNYGWQAGN[+1378.476]HSAFWGMTLDEGIR.Y	HexNAc(2)Hex(6)	N[+1378]	>sp|Q9GZM7|TINAL_HUMAN Tubulointerstitial nephritis antigen-like OS=Homo sapiens OX=9606 GN=TINAGL1 PE=1 SV=1	Color2 [DarkGray]	1	4		23.2801	17.369	23.8939	23.9913	24.1878	25.5706
	0.325191	1.08008	K.AINQGNYGWQAGN[+1540.529]HSAFWGMTLDEGIR.Y	HexNAc(2)Hex(7)	N[+1541]	>sp|Q9GZM7|TINAL_HUMAN Tubulointerstitial nephritis antigen-like OS=Homo sapiens OX=9606 GN=TINAGL1 PE=1 SV=1	Color2 [DarkGray]	1	4		21.7237	21.9495	22.1519	21.9298	18.1631	22.4919
	0.808216	-3.31821	K.AINQGNYGWQAGN[+1702.581]HSAFWGMTLDEGIR.Y	HexNAc(2)Hex(8)	N[+1703]	>sp|Q9GZM7|TINAL_HUMAN Tubulointerstitial nephritis antigen-like OS=Homo sapiens OX=9606 GN=TINAGL1 PE=1 SV=1	Color2 [DarkGray]	1	4		18.6422	18.9493	19.7641	18.6982	24.3422	24.2698
	0.906758	-1.78596	K.AINQGNYGWQAGN[+1704.635]HSAFWGMTLDEGIR.Y	HexNAc(6)Hex(3)	N[+1705]	>sp|Q9GZM7|TINAL_HUMAN Tubulointerstitial nephritis antigen-like OS=Homo sapiens OX=9606 GN=TINAGL1 PE=1 SV=1	Color2 [DarkGray]	1	4		18.2135	18.9352	17.343	19.5288	21.4894	18.8316
	0.218083	-0.285157	K.AKELYEPIWQN[+2059.735]FTDPQLR.R	HexNAc(4)Hex(5)Fuc(1)NeuAc(1)	N[+2060]	>sp|P12821|ACE_HUMAN Angiotensin-converting enzyme OS=Homo sapiens OX=9606 GN=ACE PE=1 SV=1	Color2 [DarkGray]	1	4		19.2742	19.1716	19.6494	19.6604	20.49	18.8001
	0.0401682	0.130475	K.AKELYEPIWQN[+2424.867]FTDPQLR.R	HexNAc(5)Hex(6)Fuc(1)NeuAc(1)	N[+2425]	>sp|P12821|ACE_HUMAN Angiotensin-converting enzyme OS=Homo sapiens OX=9606 GN=ACE PE=1 SV=1	Color2 [DarkGray]	1	4		18.5105	19.9688	19.4718	17.6944	18.7327	21.1327
	0.172698	0.244691	K.ALPQPQN[+1622.582]VTSLLGC[+57.021]TH.-	HexNAc(4)Hex(5)	C[+57], N[+1623]	>sp|P02790|HEMO_HUMAN Hemopexin OS=Homo sapiens OX=9606 GN=HPX PE=1 SV=2	Color2 [DarkGray]	1	4		20.3271	19.1209	19.162	19.9538	18.7053	19.2168
	2.54326	0.986211	K.ALPQPQN[+1913.677]VTSLLGC[+57.021]TH.-	HexNAc(4)Hex(5)NeuAc(1)	C[+57], N[+1914]	>sp|P02790|HEMO_HUMAN Hemopexin OS=Homo sapiens OX=9606 GN=HPX PE=1 SV=2	Color2 [DarkGray]	1	4		27.5168	27.9907	27.6114	26.7663	26.7619	26.6322
+	2.91062	2.77314	K.ALPQPQN[+2204.772]VTSLLGC[+57.021]TH.-	HexNAc(4)Hex(5)NeuAc(2)	C[+57], N[+2205]	>sp|P02790|HEMO_HUMAN Hemopexin OS=Homo sapiens OX=9606 GN=HPX PE=1 SV=2	Color2 [DarkGray]	1	4		30.9297	30.3946	31.1293	28.3913	27.5365	28.2063
	0.228975	0.964758	K.ALPQPQN[+2221.788]VTSLLGC[+57.021]TH.-	HexNAc(4)Hex(6)Fuc(1)NeuAc(1)	C[+57], N[+2222]	>sp|P02790|HEMO_HUMAN Hemopexin OS=Homo sapiens OX=9606 GN=HPX PE=1 SV=2	Color2 [DarkGray]	1	4		18.3353	23.2676	18.3697	19.4181	18.8906	18.7696
+	2.73794	2.97982	K.ALPQPQN[+2350.830]VTSLLGC[+57.021]TH.-	HexNAc(4)Hex(5)Fuc(1)NeuAc(2)	C[+57], N[+2351]	>sp|P02790|HEMO_HUMAN Hemopexin OS=Homo sapiens OX=9606 GN=HPX PE=1 SV=2	Color2 [DarkGray]	1	4		22.4565	21.3235	22.4273	19.1419	19.3357	18.7902
	1.96409	4.65435	K.ALPQPQN[+2861.000]VTSLLGC[+57.021]TH.-	HexNAc(5)Hex(6)NeuAc(3)	C[+57], N[+2861]	>sp|P02790|HEMO_HUMAN Hemopexin OS=Homo sapiens OX=9606 GN=HPX PE=1 SV=2	Color2 [DarkGray]	1	4		22.7269	25.7433	23.0034	19.3065	18.4525	19.7515
	0.392404	0.877077	K.ALPQPQN[+3007.058]VTSLLGC[+57.021]TH.-	HexNAc(5)Hex(6)Fuc(1)NeuAc(3)	C[+57], N[+3007]	>sp|P02790|HEMO_HUMAN Hemopexin OS=Homo sapiens OX=9606 GN=HPX PE=1 SV=2	Color2 [DarkGray]	1	4		19.6146	19.5317	21.781	19.739	18.2924	20.2647
	0.379006	1.11475	K.ALQAVYSMMSWPDDVPPEGWN[+2204.772]R.T	HexNAc(4)Hex(5)NeuAc(2)	N[+2205]	>sp|P00751|CFAB_HUMAN Complement factor B OS=Homo sapiens OX=9606 GN=CFB PE=1 SV=2	Color2 [DarkGray]	1	4		19.5951	19.5016	23.2525	19.6957	19.6816	19.6276
	1.42953	-3.19941	K.ALSPN[+1216.423]STISSAPK.D	HexNAc(2)Hex(5)	N[+1216]	>sp|Q9UH99|SUN2_HUMAN SUN domain-containing protein 2 OS=Homo sapiens OX=9606 GN=SUN2 PE=1 SV=3	Color2 [DarkGray]	1	4		21.2896	19.1355	19.3207	24.482	23.0831	21.779
	0.294097	-0.539137	K.ALSPN[+1378.476]STISSAPK.D	HexNAc(2)Hex(6)	N[+1378]	>sp|Q9UH99|SUN2_HUMAN SUN domain-containing protein 2 OS=Homo sapiens OX=9606 GN=SUN2 PE=1 SV=3	Color2 [DarkGray]	1	4		26.5489	24.3099	26.36	26.6451	25.9868	26.2043
	0.235639	-0.203276	K.ALSPN[+1540.529]STISSAPK.D	HexNAc(2)Hex(7)	N[+1541]	>sp|Q9UH99|SUN2_HUMAN SUN domain-containing protein 2 OS=Homo sapiens OX=9606 GN=SUN2 PE=1 SV=3	Color2 [DarkGray]	1	4		24.9721	24.4886	25.4589	25.5009	24.8388	25.1899
	0.216815	-0.469468	K.ALSPN[+1702.581]STISSAPK.D	HexNAc(2)Hex(8)	N[+1703]	>sp|Q9UH99|SUN2_HUMAN SUN domain-containing protein 2 OS=Homo sapiens OX=9606 GN=SUN2 PE=1 SV=3	Color2 [DarkGray]	1	4		25.0584	26.4474	25.2669	25.3517	27.5059	25.3234
	1.51787	4.76589	K.AMSSN[+1702.581]ETAAYK.I	HexNAc(2)Hex(8)	N[+1703]	>sp|Q8TCJ2|STT3B_HUMAN Dolichyl-diphosphooligosaccharide--protein glycosyltransferase subunit STT3B OS=Homo sapiens OX=9606 GN=STT3B PE=1 SV=1	Color2 [DarkGray]	1	4		21.8594	26.4698	25.5072	20.1431	20.2742	19.1214
	1.92666	2.58062	K.AMSSN[+1864.634]ETAAYK.I	HexNAc(2)Hex(9)	N[+1865]	>sp|Q8TCJ2|STT3B_HUMAN Dolichyl-diphosphooligosaccharide--protein glycosyltransferase subunit STT3B OS=Homo sapiens OX=9606 GN=STT3B PE=1 SV=1	Color2 [DarkGray]	1	4		27.0149	28.9139	27.7542	25.249	25.6928	24.9994
+	2.68136	-4.2935	K.AN[+1216.423]TSQPDIVEGGAVYYC[+57.021]PWPAEGSAQC[+57.021]R.Q	HexNAc(2)Hex(5)	C[+57]*2, N[+1216]	>sp|P53708|ITA8_HUMAN Integrin alpha-8 OS=Homo sapiens OX=9606 GN=ITGA8 PE=1 SV=3	Color2 [DarkGray]	1	4		18.4864	19.4472	17.6394	23.2612	22.2319	22.9604
	0.280347	-1.10223	K.AN[+1216.423]VTSENNMPR.T	HexNAc(2)Hex(5)	N[+1216]	>sp|P11215|ITAM_HUMAN Integrin alpha-M OS=Homo sapiens OX=9606 GN=ITGAM PE=1 SV=2	Color2 [DarkGray]	1	4		18.2824	19.1158	22.2799	22.1627	18.9828	21.8393
	0.276997	-0.789821	K.AN[+1403.507]TTQPGIVEGGQVLK.C	HexNAc(3)Hex(4)Fuc(1)	N[+1404]	>sp|P06756|ITAV_HUMAN Integrin alpha-V OS=Homo sapiens OX=9606 GN=ITGAV PE=1 SV=2	Color2 [DarkGray]	1	4		19.2094	19.1709	21.2753	22.4629	20.0809	19.4812
	1.04614	-3.70561	K.AN[+1419.502]TSQPDIVEGGAVYYC[+57.021]PWPAEGSAQC[+57.021]R.Q	HexNAc(3)Hex(5)	C[+57]*2, N[+1420]	>sp|P53708|ITA8_HUMAN Integrin alpha-8 OS=Homo sapiens OX=9606 GN=ITGA8 PE=1 SV=3	Color2 [DarkGray]	1	4		17.6085	18.3329	19.8962	23.2155	24.3867	19.3523
	0.688086	-2.10558	K.AN[+1419.502]VTSENNMPR.T	HexNAc(3)Hex(5)	N[+1420]	>sp|P11215|ITAM_HUMAN Integrin alpha-M OS=Homo sapiens OX=9606 GN=ITGAM PE=1 SV=2	Color2 [DarkGray]	1	4		22.969	22.3184	18.7457	24.3295	22.7509	23.2694
+	2.74249	5.09661	K.AN[+1540.529]FSIK.I	HexNAc(2)Hex(7)	N[+1541]	>sp|Q6P179|ERAP2_HUMAN Endoplasmic reticulum aminopeptidase 2 OS=Homo sapiens OX=9606 GN=ERAP2 PE=1 SV=2	Color2 [DarkGray]	1	4		24.6957	24.0462	24.217	17.9394	20.1594	19.5702
	0.89998	0.811813	K.AN[+1540.529]TTQPGIVEGGQVLK.C	HexNAc(2)Hex(7)	N[+1541]	>sp|P06756|ITAV_HUMAN Integrin alpha-V OS=Homo sapiens OX=9606 GN=ITGAV PE=1 SV=2	Color2 [DarkGray]	1	4		20.6379	19.2596	19.9195	19.1555	19.3482	18.8778
	1.98753	-3.15028	K.AN[+1540.529]VTSENNMPR.T	HexNAc(2)Hex(7)	N[+1541]	>sp|P11215|ITAM_HUMAN Integrin alpha-M OS=Homo sapiens OX=9606 GN=ITGAM PE=1 SV=2	Color2 [DarkGray]	1	4		21.2374	18.9871	19.6083	23.2413	22.7738	23.2686
	0.890024	4.36172	K.AN[+1565.560]TTQPGIVEGGQVLK.C	HexNAc(3)Hex(5)Fuc(1)	N[+1566]	>sp|P06756|ITAV_HUMAN Integrin alpha-V OS=Homo sapiens OX=9606 GN=ITGAV PE=1 SV=2	Color2 [DarkGray]	1	4		23.5593	28.7739	28.5673	25.0233	22.9922	19.7999
	0.432007	-0.987485	K.AN[+1581.555]TSQPDIVEGGAVYYC[+57.021]PWPAEGSAQC[+57.021]R.Q	HexNAc(3)Hex(6)	C[+57]*2, N[+1582]	>sp|P53708|ITA8_HUMAN Integrin alpha-8 OS=Homo sapiens OX=9606 GN=ITGA8 PE=1 SV=3	Color2 [DarkGray]	1	4		19.9065	18.6925	20.8637	19.3089	21.5628	21.5534
	1.54992	2.8276	K.AN[+1581.555]VTSENNMPR.T	HexNAc(3)Hex(6)	N[+1582]	>sp|P11215|ITAM_HUMAN Integrin alpha-M OS=Homo sapiens OX=9606 GN=ITGAM PE=1 SV=2	Color2 [DarkGray]	1	4		23.0581	20.8182	23.3962	19.4981	19.2599	20.0316
	1.06618	3.45339	K.AN[+1702.581]ATIEVK.A	HexNAc(2)Hex(8)	N[+1703]	>sp|Q9Y639|NPTN_HUMAN Neuroplastin OS=Homo sapiens OX=9606 GN=NPTN PE=1 SV=2	Color2 [DarkGray]	1	4		24.2204	25.6029	24.3459	18.3633	22.5423	22.9033
+	4.39661	3.49155	K.AN[+1702.581]NSWFQSILR.Q	HexNAc(2)Hex(8)	N[+1703]	>sp|Q92542|NICA_HUMAN Nicastrin OS=Homo sapiens OX=9606 GN=NCSTN PE=1 SV=2	Color2 [DarkGray]	1	4		22.8831	23.1218	22.9571	19.7928	19.4668	19.2277
	1.28893	1.84802	K.AN[+1702.581]TTQPGIVEGGQVLK.C	HexNAc(2)Hex(8)	N[+1703]	>sp|P06756|ITAV_HUMAN Integrin alpha-V OS=Homo sapiens OX=9606 GN=ITGAV PE=1 SV=2	Color2 [DarkGray]	1	4		21.2709	21.5287	21.7385	18.6483	20.898	19.4478
	0.196974	1.37285	K.AN[+1710.598]VTSENNMPR.T	HexNAc(3)Hex(5)NeuAc(1)	N[+1711]	>sp|P11215|ITAM_HUMAN Integrin alpha-M OS=Homo sapiens OX=9606 GN=ITGAM PE=1 SV=2	Color2 [DarkGray]	1	4		20.4844	21.055	27.2943	19.1382	21.1085	24.4684
	0.135272	-0.346474	K.AN[+1727.613]TTQPGIVEGGQVLK.C	HexNAc(3)Hex(6)Fuc(1)	N[+1728]	>sp|P06756|ITAV_HUMAN Integrin alpha-V OS=Homo sapiens OX=9606 GN=ITGAV PE=1 SV=2	Color2 [DarkGray]	1	4		18.5493	18.8751	19.9913	17.8405	20.0303	20.5844
	0.0878628	0.211105	K.AN[+1768.640]LSQVADHLDHIK.E	HexNAc(4)Hex(5)Fuc(1)	N[+1769]	>sp|P16444|DPEP1_HUMAN Dipeptidase 1 OS=Homo sapiens OX=9606 GN=DPEP1 PE=1 SV=3	Color2 [DarkGray]	1	4		18.8178	19.902	19.4258	20.7055	18.7556	18.0512
+	4.63667	-3.3662	K.AN[+1768.640]TSQPGVLQGGAVYLC[+57.021]PWGASPTQC[+57.021]TPIEFDSK.G	HexNAc(4)Hex(5)Fuc(1)	C[+57]*2, N[+1769]	>sp|P08648|ITA5_HUMAN Integrin alpha-5 OS=Homo sapiens OX=9606 GN=ITGA5 PE=1 SV=2	Color2 [DarkGray]	1	4		19.3483	19.7415	19.8191	23.0624	22.9995	22.9457
	1.55354	-3.11928	K.AN[+1768.640]TTQPGIVEGGQVLK.C	HexNAc(4)Hex(5)Fuc(1)	N[+1769]	>sp|P06756|ITAV_HUMAN Integrin alpha-V OS=Homo sapiens OX=9606 GN=ITGAV PE=1 SV=2	Color2 [DarkGray]	1	4		21.6893	22.474	20.8819	26.1077	24.9542	23.341
	1.45269	-2.1647	K.AN[+1784.634]TTQPGIVEGGQVLK.C	HexNAc(4)Hex(6)	N[+1785]	>sp|P06756|ITAV_HUMAN Integrin alpha-V OS=Homo sapiens OX=9606 GN=ITGAV PE=1 SV=2	Color2 [DarkGray]	1	4		19.1847	19.0406	19.2716	22.6709	20.3852	20.9348
	0.00967334	-0.0803699	K.AN[+1864.634]ATIEVK.A	HexNAc(2)Hex(9)	N[+1865]	>sp|Q9Y639|NPTN_HUMAN Neuroplastin OS=Homo sapiens OX=9606 GN=NPTN PE=1 SV=2	Color2 [DarkGray]	1	4		21.9757	22.0827	19.9303	18.8042	18.7262	26.6994
	0.0294391	-0.0537453	K.AN[+1864.634]NSWFQSILR.Q	HexNAc(2)Hex(9)	N[+1865]	>sp|Q92542|NICA_HUMAN Nicastrin OS=Homo sapiens OX=9606 GN=NCSTN PE=1 SV=2	Color2 [DarkGray]	1	4		22.9614	23.0875	23.3563	24.3941	22.5569	22.6154
	0.594786	0.769414	K.AN[+1864.634]YSLQIYPDESHYFTSSSLK.Q	HexNAc(2)Hex(9)	N[+1865]	>sp|P42658|DPP6_HUMAN Dipeptidyl aminopeptidase-like protein 6 OS=Homo sapiens OX=9606 GN=DPP6 PE=1 SV=2	Color2 [DarkGray]	1	4		18.9242	19.9042	19.7152	19.643	18.6549	17.9374
	0.4089	1.86189	K.AN[+1872.651]VTSENNMPR.T	HexNAc(3)Hex(6)NeuAc(1)	N[+1873]	>sp|P11215|ITAM_HUMAN Integrin alpha-M OS=Homo sapiens OX=9606 GN=ITGAM PE=1 SV=2	Color2 [DarkGray]	1	4		18.6373	24.6193	19.2755	19.2691	19.4374	18.2399
+	3.45806	-9.40848	K.AN[+2059.735]DTSYIR.D	HexNAc(4)Hex(5)Fuc(1)NeuAc(1)	N[+2060]	>sp|P20774|MIME_HUMAN Mimecan OS=Homo sapiens OX=9606 GN=OGN PE=1 SV=1	Color2 [DarkGray]	1	4		18.5198	19.3818	19.4698	28.5022	29.8889	27.2058
	0.230128	-0.465852	K.AN[+2059.735]TSQPGVLQGGAVYLC[+57.021]PWGASPTQC[+57.021]TPIEFDSK.G	HexNAc(4)Hex(5)Fuc(1)NeuAc(1)	C[+57]*2, N[+2060]	>sp|P08648|ITA5_HUMAN Integrin alpha-5 OS=Homo sapiens OX=9606 GN=ITGA5 PE=1 SV=2	Color2 [DarkGray]	1	4		20.247	20.6518	18.3867	20.7683	20.4161	19.4987
	0.45202	1.44173	K.AN[+2100.761]RTRGVGK.E	HexNAc(5)Hex(4)Fuc(1)NeuAc(1)	N[+2101]	>sp|Q96K30|RITA1_HUMAN RBPJ-interacting and tubulin-associated protein 1 OS=Homo sapiens OX=9606 GN=RITA1 PE=1 SV=1	Color2 [DarkGray]	1	4		23.4779	19.373	19.8639	18.7973	20.347	19.2454
	0.579313	-2.31007	K.AN[+2350.830]DTSYIR.D	HexNAc(4)Hex(5)Fuc(1)NeuAc(2)	N[+2351]	>sp|P20774|MIME_HUMAN Mimecan OS=Homo sapiens OX=9606 GN=OGN PE=1 SV=1	Color2 [DarkGray]	1	4		19.4546	18.5641	19.4783	19.1073	20.4253	24.8946
	0.230511	-1.27673	K.AN[+2424.867]DTSYIR.D	HexNAc(5)Hex(6)Fuc(1)NeuAc(1)	N[+2425]	>sp|P20774|MIME_HUMAN Mimecan OS=Homo sapiens OX=9606 GN=OGN PE=1 SV=1	Color2 [DarkGray]	1	4		19.7111	18.9871	20.573	18.8468	25.2782	18.9764
	0.208764	-1.33935	K.AN[+2715.963]DTSYIR.D	HexNAc(5)Hex(6)Fuc(1)NeuAc(2)	N[+2716]	>sp|P20774|MIME_HUMAN Mimecan OS=Homo sapiens OX=9606 GN=OGN PE=1 SV=1	Color2 [DarkGray]	1	4		19.4892	19.3091	19.8634	17.3333	19.6858	25.6606
	0.236932	-0.217068	K.AN[+2921.058]NSWFQSILR.Q	HexNAc(8)Hex(8)	N[+2921]	>sp|Q92542|NICA_HUMAN Nicastrin OS=Homo sapiens OX=9606 GN=NCSTN PE=1 SV=2	Color2 [DarkGray]	1	4		19.6632	18.7448	18.9177	19.4203	18.8977	19.659
	0.0168115	-0.0387726	K.AN[+2952.052]NSWFQSILR.Q	HexNAc(6)Hex(8)Fuc(1)NeuAc(1)	N[+2952]	>sp|Q92542|NICA_HUMAN Nicastrin OS=Homo sapiens OX=9606 GN=NCSTN PE=1 SV=2	Color2 [DarkGray]	1	4		19.2533	20.4761	18.081	19.892	19.2791	18.7556
	1.60432	-1.80927	K.ANYNLPIMVTDSGKPPMTN[+1216.423]ITDLR.V	HexNAc(2)Hex(5)	N[+1216]	>sp|P55290|CAD13_HUMAN Cadherin-13 OS=Homo sapiens OX=9606 GN=CDH13 PE=1 SV=1	Color2 [DarkGray]	1	4		19.3724	19.0962	19.8026	22.1541	20.5772	20.9678
+	2.40901	-4.60909	K.ANYNLPIMVTDSGKPPMTN[+1378.476]ITDLR.V	HexNAc(2)Hex(6)	N[+1378]	>sp|P55290|CAD13_HUMAN Cadherin-13 OS=Homo sapiens OX=9606 GN=CDH13 PE=1 SV=1	Color2 [DarkGray]	1	4		18.5185	18.1866	18.8841	24.2807	23.3895	21.7464
	0.862593	-1.96423	K.ANYNLPIMVTDSGKPPMTN[+1419.502]ITDLR.V	HexNAc(3)Hex(5)	N[+1420]	>sp|P55290|CAD13_HUMAN Cadherin-13 OS=Homo sapiens OX=9606 GN=CDH13 PE=1 SV=1	Color2 [DarkGray]	1	4		18.878	19.145	19.5805	23.2433	20.1425	20.1104
	0.313627	0.428661	K.ANYNLPIMVTDSGKPPMTN[+1581.555]ITDLR.V	HexNAc(3)Hex(6)	N[+1582]	>sp|P55290|CAD13_HUMAN Cadherin-13 OS=Homo sapiens OX=9606 GN=CDH13 PE=1 SV=1	Color2 [DarkGray]	1	4		19.9513	19.8348	18.4203	19.5025	18.7186	18.6993
	0.841054	-3.01204	K.ANYNLPIMVTDSGKPPMTN[+1622.582]ITDLR.V	HexNAc(4)Hex(5)	N[+1623]	>sp|P55290|CAD13_HUMAN Cadherin-13 OS=Homo sapiens OX=9606 GN=CDH13 PE=1 SV=1	Color2 [DarkGray]	1	4		19.206	19.4972	19.875	19.4255	25.0482	23.1407
	0.890054	-2.20002	K.ANYNLPIMVTDSGKPPMTN[+1872.651]ITDLR.V	HexNAc(3)Hex(6)NeuAc(1)	N[+1873]	>sp|P55290|CAD13_HUMAN Cadherin-13 OS=Homo sapiens OX=9606 GN=CDH13 PE=1 SV=1	Color2 [DarkGray]	1	4		19.4419	18.6427	19.1008	19.007	22.4798	22.2986
	1.1328	-6.21332	K.ANYNLPIMVTDSGKPPMTN[+1913.677]ITDLR.V	HexNAc(4)Hex(5)NeuAc(1)	N[+1914]	>sp|P55290|CAD13_HUMAN Cadherin-13 OS=Homo sapiens OX=9606 GN=CDH13 PE=1 SV=1	Color2 [DarkGray]	1	4		19.0201	18.4959	18.8983	19.8698	27.5075	27.677
	0.481503	-1.5528	K.ANYNLPIMVTDSGKPPMTN[+2204.772]ITDLR.V	HexNAc(4)Hex(5)NeuAc(2)	N[+2205]	>sp|P55290|CAD13_HUMAN Cadherin-13 OS=Homo sapiens OX=9606 GN=CDH13 PE=1 SV=1	Color2 [DarkGray]	1	4		19.2425	19.16	19.4984	23.6014	19.9215	19.0364
	0.740719	1.66423	K.APVVN[+1864.634]C[+57.021]SIAVC[+57.021]QR.I	HexNAc(2)Hex(9)	C[+57]*2, N[+1865]	>sp|P11215|ITAM_HUMAN Integrin alpha-M OS=Homo sapiens OX=9606 GN=ITGAM PE=1 SV=2	Color2 [DarkGray]	1	4		19.421	22.623	22.2882	19.4497	20.0306	19.8591
	0.894829	-1.43286	K.AQEAPGTN[+1768.640]GSLVLATPGAGARPEPDSLQAR.L	HexNAc(4)Hex(5)Fuc(1)	N[+1769]	>sp|Q9H8L6|MMRN2_HUMAN Multimerin-2 OS=Homo sapiens OX=9606 GN=MMRN2 PE=1 SV=2	Color2 [DarkGray]	1	4		18.0674	19.4388	18.7057	20.9058	18.9104	20.6942
	1.77729	-3.16307	K.AQEAPGTN[+1971.719]GSLVLATPGAGARPEPDSLQAR.L	HexNAc(5)Hex(5)Fuc(1)	N[+1972]	>sp|Q9H8L6|MMRN2_HUMAN Multimerin-2 OS=Homo sapiens OX=9606 GN=MMRN2 PE=1 SV=2	Color2 [DarkGray]	1	4		19.2412	19.9238	20.1147	21.4426	23.4158	23.9104
+	2.80717	-5.35047	K.AQEAPGTN[+2059.735]GSLVLATPGAGARPEPDSLQAR.L	HexNAc(4)Hex(5)Fuc(1)NeuAc(1)	N[+2060]	>sp|Q9H8L6|MMRN2_HUMAN Multimerin-2 OS=Homo sapiens OX=9606 GN=MMRN2 PE=1 SV=2	Color2 [DarkGray]	1	4		18.3224	18.9601	20.3658	23.9094	25.109	24.6814
+	3.57384	-3.10203	K.AQEAPGTN[+2262.814]GSLVLATPGAGARPEPDSLQAR.L	HexNAc(5)Hex(5)Fuc(1)NeuAc(1)	N[+2263]	>sp|Q9H8L6|MMRN2_HUMAN Multimerin-2 OS=Homo sapiens OX=9606 GN=MMRN2 PE=1 SV=2	Color2 [DarkGray]	1	4		18.9643	19.258	18.4159	21.847	22.0741	22.0232
+	3.48107	-4.32959	K.AQEAPGTN[+2424.867]GSLVLATPGAGARPEPDSLQAR.L	HexNAc(5)Hex(6)Fuc(1)NeuAc(1)	N[+2425]	>sp|Q9H8L6|MMRN2_HUMAN Multimerin-2 OS=Homo sapiens OX=9606 GN=MMRN2 PE=1 SV=2	Color2 [DarkGray]	1	4		19.4934	18.3654	18.3989	23.1504	22.9365	23.1596
	1.89277	2.45109	K.AQGLVLEASN[+1378.476]GSVLINGQR.E	HexNAc(2)Hex(6)	N[+1378]	>sp|Q9HC84|MUC5B_HUMAN Mucin-5B OS=Homo sapiens OX=9606 GN=MUC5B PE=1 SV=3	Color2 [DarkGray]	1	4		22.866	21.241	21.1157	19.3591	19.0974	19.4129
+	2.84697	3.4314	K.AQGLVLEASN[+1540.529]GSVLINGQR.E	HexNAc(2)Hex(7)	N[+1541]	>sp|Q9HC84|MUC5B_HUMAN Mucin-5B OS=Homo sapiens OX=9606 GN=MUC5B PE=1 SV=3	Color2 [DarkGray]	1	4		22.6945	23.2333	22.5604	19.5341	18.6723	19.9875
	0.114439	0.35983	K.AQGLVLEASN[+1606.587]GSVLINGQR.E	HexNAc(4)Hex(4)Fuc(1)	N[+1607]	>sp|Q9HC84|MUC5B_HUMAN Mucin-5B OS=Homo sapiens OX=9606 GN=MUC5B PE=1 SV=3	Color2 [DarkGray]	1	4		20.9753	18.4838	20.3012	20.1641	17.853	20.6636
	0.755575	0.251659	K.AQGLVLEASN[+1694.603]GSVLINGQR.E	HexNAc(3)Hex(4)Fuc(1)NeuAc(1)	N[+1695]	>sp|Q9HC84|MUC5B_HUMAN Mucin-5B OS=Homo sapiens OX=9606 GN=MUC5B PE=1 SV=3	Color2 [DarkGray]	1	4		19.4923	19.6738	19.7353	19.6369	19.1795	19.33
+	3.61791	5.54917	K.AQGLVLEASN[+1702.581]GSVLINGQR.E	HexNAc(2)Hex(8)	N[+1703]	>sp|Q9HC84|MUC5B_HUMAN Mucin-5B OS=Homo sapiens OX=9606 GN=MUC5B PE=1 SV=3	Color2 [DarkGray]	1	4		24.6886	23.6351	23.9509	19.0021	18.6964	17.9287
+	3.34049	4.9782	K.AQGLVLEASN[+1768.640]GSVLINGQR.E	HexNAc(4)Hex(5)Fuc(1)	N[+1769]	>sp|Q9HC84|MUC5B_HUMAN Mucin-5B OS=Homo sapiens OX=9606 GN=MUC5B PE=1 SV=3	Color2 [DarkGray]	1	4		25.329	25.2034	24.9348	20.0594	21.022	19.4511
	0.00995352	-0.0200392	K.AQGLVLEASN[+1809.666]GSVLINGQR.E	HexNAc(5)Hex(4)Fuc(1)	N[+1810]	>sp|Q9HC84|MUC5B_HUMAN Mucin-5B OS=Homo sapiens OX=9606 GN=MUC5B PE=1 SV=3	Color2 [DarkGray]	1	4		18.7664	20.5601	20.5211	19.5518	20.5509	19.805
+	2.27815	2.3827	K.AQGLVLEASN[+1864.634]GSVLINGQR.E	HexNAc(2)Hex(9)	N[+1865]	>sp|Q9HC84|MUC5B_HUMAN Mucin-5B OS=Homo sapiens OX=9606 GN=MUC5B PE=1 SV=3	Color2 [DarkGray]	1	4		21.9528	22.203	22.2363	18.9735	20.428	19.8425
+	2.45558	3.95553	K.AQGLVLEASN[+1897.682]GSVLINGQR.E	HexNAc(4)Hex(4)Fuc(1)NeuAc(1)	N[+1898]	>sp|Q9HC84|MUC5B_HUMAN Mucin-5B OS=Homo sapiens OX=9606 GN=MUC5B PE=1 SV=3	Color2 [DarkGray]	1	4		23.1705	21.8321	23.4709	19.4626	19.0276	18.1168
+	5.72252	8.07826	K.AQGLVLEASN[+2059.735]GSVLINGQR.E	HexNAc(4)Hex(5)Fuc(1)NeuAc(1)	N[+2060]	>sp|Q9HC84|MUC5B_HUMAN Mucin-5B OS=Homo sapiens OX=9606 GN=MUC5B PE=1 SV=3	Color2 [DarkGray]	1	4		27.5431	27.5297	27.5241	19.0728	19.6114	19.6779
+	2.72262	4.39719	K.AQGLVLEASN[+2100.761]GSVLINGQR.E	HexNAc(5)Hex(4)Fuc(1)NeuAc(1)	N[+2101]	>sp|Q9HC84|MUC5B_HUMAN Mucin-5B OS=Homo sapiens OX=9606 GN=MUC5B PE=1 SV=3	Color2 [DarkGray]	1	4		24.2083	22.8741	24.0188	18.442	19.6002	19.8673
+	3.31033	6.39957	K.AQGLVLEASN[+2133.772]GSVLINGQR.E	HexNAc(5)Hex(6)Fuc(1)	N[+2134]	>sp|Q9HC84|MUC5B_HUMAN Mucin-5B OS=Homo sapiens OX=9606 GN=MUC5B PE=1 SV=3	Color2 [DarkGray]	1	4		26.3248	26.6526	24.8325	20.0352	19.1588	19.4171
	0.338214	0.954906	K.AQGLVLEASN[+2262.814]GSVLINGQR.E	HexNAc(5)Hex(5)Fuc(1)NeuAc(1)	N[+2263]	>sp|Q9HC84|MUC5B_HUMAN Mucin-5B OS=Homo sapiens OX=9606 GN=MUC5B PE=1 SV=3	Color2 [DarkGray]	1	4		19.5618	18.3984	22.0503	19.8597	18.9721	18.314
+	3.34685	7.07168	K.AQGLVLEASN[+2350.830]GSVLINGQR.E	HexNAc(4)Hex(5)Fuc(1)NeuAc(2)	N[+2351]	>sp|Q9HC84|MUC5B_HUMAN Mucin-5B OS=Homo sapiens OX=9606 GN=MUC5B PE=1 SV=3	Color2 [DarkGray]	1	4		25.8737	27.8969	26.8762	19.6908	20.4215	19.3195
+	4.73077	7.39053	K.AQGLVLEASN[+2424.867]GSVLINGQR.E	HexNAc(5)Hex(6)Fuc(1)NeuAc(1)	N[+2425]	>sp|Q9HC84|MUC5B_HUMAN Mucin-5B OS=Homo sapiens OX=9606 GN=MUC5B PE=1 SV=3	Color2 [DarkGray]	1	4		27.6325	27.5171	28.1224	20.6907	19.876	20.5337
	0.300551	0.883869	K.AQGLVLEASN[+2481.889]GSVLINGQR.E	HexNAc(6)Hex(6)NeuAc(1)	N[+2482]	>sp|Q9HC84|MUC5B_HUMAN Mucin-5B OS=Homo sapiens OX=9606 GN=MUC5B PE=1 SV=3	Color2 [DarkGray]	1	4		22.4509	18.7644	19.2774	18.8067	19.1598	19.8747
	0.67197	1.1409	K.AQGLVLEASN[+2715.963]GSVLINGQR.E	HexNAc(5)Hex(6)Fuc(1)NeuAc(2)	N[+2716]	>sp|Q9HC84|MUC5B_HUMAN Mucin-5B OS=Homo sapiens OX=9606 GN=MUC5B PE=1 SV=3	Color2 [DarkGray]	1	4		19.2429	21.4687	21.4461	19.2479	19.9977	19.4892
	0.381838	1.46457	K.AQGLVLEASN[+2789.999]GSVLINGQR.E	HexNAc(6)Hex(7)Fuc(1)NeuAc(1)	N[+2790]	>sp|Q9HC84|MUC5B_HUMAN Mucin-5B OS=Homo sapiens OX=9606 GN=MUC5B PE=1 SV=3	Color2 [DarkGray]	1	4		17.9413	21.9123	23.1117	20.1714	19.6032	18.7969
	0.511076	1.16892	K.AQGLVLEASN[+2878.015]GSVLINGQR.E	HexNAc(5)Hex(7)Fuc(1)NeuAc(2)	N[+2878]	>sp|Q9HC84|MUC5B_HUMAN Mucin-5B OS=Homo sapiens OX=9606 GN=MUC5B PE=1 SV=3	Color2 [DarkGray]	1	4		19.5741	20.6033	21.1436	17.6042	20.6459	19.5642
	0.520292	1.40613	K.AQGLVLEASN[+3165.164]GSVLINGQR.E	HexNAc(10)Hex(7)	N[+3165]	>sp|Q9HC84|MUC5B_HUMAN Mucin-5B OS=Homo sapiens OX=9606 GN=MUC5B PE=1 SV=3	Color2 [DarkGray]	1	4		19.7941	21.9742	18.4047	19.4904	17.552	18.9121
	0.170225	0.310279	K.AQYEGRLSLLEEPGN[+1581.555]GTFTVILNQLTSR.D	HexNAc(3)Hex(6)	N[+1582]	>sp|P01833|PIGR_HUMAN Polymeric immunoglobulin receptor OS=Homo sapiens OX=9606 GN=PIGR PE=1 SV=4	Color2 [DarkGray]	1	4		20.7888	19.1231	18.7261	19.776	18.8833	19.0479
	0.845523	3.72265	K.AQYEGRLSLLEEPGN[+1663.608]GTFTVILNQLTSR.D	HexNAc(5)Hex(4)	N[+1664]	>sp|P01833|PIGR_HUMAN Polymeric immunoglobulin receptor OS=Homo sapiens OX=9606 GN=PIGR PE=1 SV=4	Color2 [DarkGray]	1	4		19.4652	25.299	25.8585	19.7892	19.8122	19.8534
	0.464861	0.82674	K.AQYEGRLSLLEEPGN[+1704.635]GTFTVILNQLTSR.D	HexNAc(6)Hex(3)	N[+1705]	>sp|P01833|PIGR_HUMAN Polymeric immunoglobulin receptor OS=Homo sapiens OX=9606 GN=PIGR PE=1 SV=4	Color2 [DarkGray]	1	4		19.463	20.2901	22.0174	20.0267	19.4786	19.785
	0.00863414	-0.019544	K.AQYEGRLSLLEEPGN[+1866.688]GTFTVILNQLTSR.D	HexNAc(6)Hex(4)	N[+1867]	>sp|P01833|PIGR_HUMAN Polymeric immunoglobulin receptor OS=Homo sapiens OX=9606 GN=PIGR PE=1 SV=4	Color2 [DarkGray]	1	4		18.8059	20.2216	20.4496	19.0033	19.6846	20.8479
	0.368627	0.577544	K.AQYEGRLSLLEEPGN[+2028.740]GTFTVILNQLTSR.D	HexNAc(6)Hex(5)	N[+2029]	>sp|P01833|PIGR_HUMAN Polymeric immunoglobulin receptor OS=Homo sapiens OX=9606 GN=PIGR PE=1 SV=4	Color2 [DarkGray]	1	4		19.465	19.9379	18.7459	17.8279	19.7541	18.8342
	1.54223	5.56836	K.ASSSFQAN[+1038.375]GTK.F	HexNAc(2)Hex(3)Fuc(1)	N[+1038]	>sp|O96009|NAPSA_HUMAN Napsin-A OS=Homo sapiens OX=9606 GN=NAPSA PE=1 SV=1	Color2 [DarkGray]	1	4		25.5592	26.0471	28.1153	19.5211	19.5528	23.9426
	0.665006	1.93236	K.ASSSFQAN[+1054.370]GTK.F	HexNAc(2)Hex(4)	N[+1054]	>sp|O96009|NAPSA_HUMAN Napsin-A OS=Homo sapiens OX=9606 GN=NAPSA PE=1 SV=1	Color2 [DarkGray]	1	4		23.0111	19.1554	23.0056	19.6815	19.3492	20.3444
	1.77997	6.06883	K.ASSSFQAN[+1216.423]GTK.F	HexNAc(2)Hex(5)	N[+1216]	>sp|O96009|NAPSA_HUMAN Napsin-A OS=Homo sapiens OX=9606 GN=NAPSA PE=1 SV=1	Color2 [DarkGray]	1	4		26.2253	26.8197	26.9962	19.0764	19.122	23.6363
	0.807957	3.89055	K.ASSSFQAN[+1378.476]GTK.F	HexNAc(2)Hex(6)	N[+1378]	>sp|O96009|NAPSA_HUMAN Napsin-A OS=Homo sapiens OX=9606 GN=NAPSA PE=1 SV=1	Color2 [DarkGray]	1	4		25.4755	18.3973	24.5531	19.1386	19.0062	18.6095
	0.361795	1.57711	K.ASSSFQAN[+1694.603]GTK.F	HexNAc(3)Hex(4)Fuc(1)NeuAc(1)	N[+1695]	>sp|O96009|NAPSA_HUMAN Napsin-A OS=Homo sapiens OX=9606 GN=NAPSA PE=1 SV=1	Color2 [DarkGray]	1	4		19.2063	19.6717	24.6637	20.4799	18.7282	19.6022
	0.35059	-1.02736	K.AVFDSLLQVN[+2059.735]VSGPTHLNAQFLR.S	HexNAc(4)Hex(5)Fuc(1)NeuAc(1)	N[+2060]	>sp|A8TX70|CO6A5_HUMAN Collagen alpha-5(VI) chain OS=Homo sapiens OX=9606 GN=COL6A5 PE=1 SV=1	Color2 [DarkGray]	1	4		19.5305	20.4615	20.3877	20.5208	23.4389	19.5022
	0.67467	-2.06687	K.AVFDSLLQVN[+2350.830]VSGPTHLNAQFLR.S	HexNAc(4)Hex(5)Fuc(1)NeuAc(2)	N[+2351]	>sp|A8TX70|CO6A5_HUMAN Collagen alpha-5(VI) chain OS=Homo sapiens OX=9606 GN=COL6A5 PE=1 SV=1	Color2 [DarkGray]	1	4		18.9611	18.9104	19.9398	19.504	23.9708	20.5372
	0.158814	-0.413264	K.AVYSVMAMVEHSGN[+1216.423]YTC[+57.021]K.V	HexNAc(2)Hex(5)	C[+57], N[+1216]	>sp|P16284|PECA1_HUMAN Platelet endothelial cell adhesion molecule OS=Homo sapiens OX=9606 GN=PECAM1 PE=1 SV=2	Color2 [DarkGray]	1	4		19.3973	19.8079	19.2059	19.0186	18.8325	21.7998
	0.320226	-0.509784	K.AVYSVMAMVEHSGN[+1419.502]YTC[+57.021]K.V	HexNAc(3)Hex(5)	C[+57], N[+1420]	>sp|P16284|PECA1_HUMAN Platelet endothelial cell adhesion molecule OS=Homo sapiens OX=9606 GN=PECAM1 PE=1 SV=2	Color2 [DarkGray]	1	4		19.6971	18.6046	18.8072	19.5687	18.5654	20.5042
+	2.05964	-2.08855	K.AVYSVMAMVEHSGN[+1540.529]YTC[+57.021]K.V	HexNAc(2)Hex(7)	C[+57], N[+1541]	>sp|P16284|PECA1_HUMAN Platelet endothelial cell adhesion molecule OS=Homo sapiens OX=9606 GN=PECAM1 PE=1 SV=2	Color2 [DarkGray]	1	4		19.1144	19.078	20.2884	21.3188	21.9245	21.5031
	0.0168674	-0.0437991	K.AVYSVMAMVEHSGN[+1548.545]YTC[+57.021]K.V	HexNAc(3)Hex(4)NeuAc(1)	C[+57], N[+1549]	>sp|P16284|PECA1_HUMAN Platelet endothelial cell adhesion molecule OS=Homo sapiens OX=9606 GN=PECAM1 PE=1 SV=2	Color2 [DarkGray]	1	4		19.692	19.6481	18.889	18.8671	18.4175	21.0759
+	3.09234	-5.32979	K.AVYSVMAMVEHSGN[+1581.555]YTC[+57.021]K.V	HexNAc(3)Hex(6)	C[+57], N[+1582]	>sp|P16284|PECA1_HUMAN Platelet endothelial cell adhesion molecule OS=Homo sapiens OX=9606 GN=PECAM1 PE=1 SV=2	Color2 [DarkGray]	1	4		19.5272	18.6365	20.5086	25.1461	24.4388	25.0768
	1.34187	-1.50229	K.AVYSVMAMVEHSGN[+1710.598]YTC[+57.021]K.V	HexNAc(3)Hex(5)NeuAc(1)	C[+57], N[+1711]	>sp|P16284|PECA1_HUMAN Platelet endothelial cell adhesion molecule OS=Homo sapiens OX=9606 GN=PECAM1 PE=1 SV=2	Color2 [DarkGray]	1	4		18.6596	17.8252	19.4271	20.5815	20.1035	19.7338
+	2.74442	-4.23677	K.AVYSVMAMVEHSGN[+1872.651]YTC[+57.021]K.V	HexNAc(3)Hex(6)NeuAc(1)	C[+57], N[+1873]	>sp|P16284|PECA1_HUMAN Platelet endothelial cell adhesion molecule OS=Homo sapiens OX=9606 GN=PECAM1 PE=1 SV=2	Color2 [DarkGray]	1	4		18.7161	19.8276	19.3344	23.7347	22.6217	24.232
	0.489975	-1.19158	K.AWGTPC[+57.021]EM[+15.995]C[+57.021]PAVN[+1768.640]TSEYK.I	HexNAc(4)Hex(5)Fuc(1)	C[+57]*2, M[+16], N[+1769]	>sp|P35555|FBN1_HUMAN Fibrillin-1 OS=Homo sapiens OX=9606 GN=FBN1 PE=1 SV=4	Color2 [DarkGray]	1	4		19.4014	18.8577	19.8662	18.5307	21.641	21.5284
	0.578286	-1.63862	K.AWGTPC[+57.021]EM[+15.995]C[+57.021]PAVN[+2059.735]TSEYK.I	HexNAc(4)Hex(5)Fuc(1)NeuAc(1)	C[+57]*2, M[+16], N[+2060]	>sp|P35555|FBN1_HUMAN Fibrillin-1 OS=Homo sapiens OX=9606 GN=FBN1 PE=1 SV=4	Color2 [DarkGray]	1	4		18.7176	19.3296	19.6677	19.3261	23.3092	19.9955
+	3.57428	-5.57076	K.AWGTPC[+57.021]EMC[+57.021]PAVN[+1768.640]TSEYK.I	HexNAc(4)Hex(5)Fuc(1)	C[+57]*2, N[+1769]	>sp|P35555|FBN1_HUMAN Fibrillin-1 OS=Homo sapiens OX=9606 GN=FBN1 PE=1 SV=4	Color2 [DarkGray]	1	4		19.5917	19.1184	19.7856	25.8524	24.9164	24.4392
+	3.37157	-3.31171	K.AWGTPC[+57.021]EMC[+57.021]PAVN[+2059.735]TSEYK.I	HexNAc(4)Hex(5)Fuc(1)NeuAc(1)	C[+57]*2, N[+2060]	>sp|P35555|FBN1_HUMAN Fibrillin-1 OS=Homo sapiens OX=9606 GN=FBN1 PE=1 SV=4	Color2 [DarkGray]	1	4		22.9514	23.6465	23.2362	27.0489	26.2917	26.4286
	0.630203	-0.519181	K.AWGTPC[+57.021]EMC[+57.021]PAVN[+2350.830]TSEYK.I	HexNAc(4)Hex(5)Fuc(1)NeuAc(2)	C[+57]*2, N[+2351]	>sp|P35555|FBN1_HUMAN Fibrillin-1 OS=Homo sapiens OX=9606 GN=FBN1 PE=1 SV=4	Color2 [DarkGray]	1	4		23.8829	23.3114	24.2911	24.8235	24.0779	24.1416
	1.69179	3.06727	K.C[+57.021]C[+57.021]GFTN[+1872.651]YTDFEDSPYFK.E	HexNAc(3)Hex(6)NeuAc(1)	C[+57]*2, N[+1873]	>sp|O60635|TSN1_HUMAN Tetraspanin-1 OS=Homo sapiens OX=9606 GN=TSPAN1 PE=1 SV=2	Color2 [DarkGray]	1	4		21.0795	23.5783	23.4738	19.4492	19.8086	19.672
+	2.71254	4.80546	K.C[+57.021]EC[+57.021]HFLN[+1540.529]GTER.V	HexNAc(2)Hex(7)	C[+57]*2, N[+1541]	>sp|P13762|DRB4_HUMAN HLA class II histocompatibility antigen, DR beta 4 chain OS=Homo sapiens OX=9606 GN=HLA-DRB4 PE=1 SV=2	Color2 [DarkGray]	1	4		22.7511	24.7978	23.3365	18.7239	18.419	19.326
+	3.97611	4.92604	K.C[+57.021]EC[+57.021]HFLN[+1702.581]GTER.V	HexNAc(2)Hex(8)	C[+57]*2, N[+1703]	>sp|P13762|DRB4_HUMAN HLA class II histocompatibility antigen, DR beta 4 chain OS=Homo sapiens OX=9606 GN=HLA-DRB4 PE=1 SV=2	Color2 [DarkGray]	1	4		24.0474	24.6252	24.3086	19.3408	19.9037	18.9585
	0.580541	2.06429	K.C[+57.021]EC[+57.021]HFLN[+1864.634]GTER.V	HexNAc(2)Hex(9)	C[+57]*2, N[+1865]	>sp|P13762|DRB4_HUMAN HLA class II histocompatibility antigen, DR beta 4 chain OS=Homo sapiens OX=9606 GN=HLA-DRB4 PE=1 SV=2	Color2 [DarkGray]	1	4		18.7367	20.2202	23.9134	18.9278	18.2199	19.5297
	1.31556	2.2113	K.C[+57.021]FDAMEVDALN[+1540.529]SSHPVSTPVENPAQIR.E	HexNAc(2)Hex(7)	C[+57], N[+1541]	>sp|Q9NZ08|ERAP1_HUMAN Endoplasmic reticulum aminopeptidase 1 OS=Homo sapiens OX=9606 GN=ERAP1 PE=1 SV=3	Color2 [DarkGray]	1	4		21.4941	20.9248	22.8345	19.1805	20.6143	18.8247
+	2.88411	2.52044	K.C[+57.021]GALQGLYTTVDFGTGSN[+1540.529]ITDAFLSQR.K	HexNAc(2)Hex(7)	C[+57], N[+1541]	>sp|P16278|BGAL_HUMAN Beta-galactosidase OS=Homo sapiens OX=9606 GN=GLB1 PE=1 SV=2	Color2 [DarkGray]	1	4		21.5459	22.1988	21.5539	19.5004	19.445	18.7919
	0.841059	-1.9931	K.C[+57.021]GLSQSQGN[+2059.735]LSHVDWFSVHK.E	HexNAc(4)Hex(5)Fuc(1)NeuAc(1)	C[+57], N[+2060]	>sp|P43121|MUC18_HUMAN Cell surface glycoprotein MUC18 OS=Homo sapiens OX=9606 GN=MCAM PE=1 SV=2	Color2 [DarkGray]	1	4		19.2889	19.4232	19.6822	23.5575	20.9396	19.8763
	0.568939	-1.6785	K.C[+57.021]GLSQSQGN[+2350.830]LSHVDWFSVHK.E	HexNAc(4)Hex(5)Fuc(1)NeuAc(2)	C[+57], N[+2351]	>sp|P43121|MUC18_HUMAN Cell surface glycoprotein MUC18 OS=Homo sapiens OX=9606 GN=MCAM PE=1 SV=2	Color2 [DarkGray]	1	4		20.0657	19.3501	18.531	23.4451	20.0244	19.5128
	0.514536	0.551193	K.C[+57.021]GLVPVLAENYN[+1548.545]K.S	HexNAc(3)Hex(4)NeuAc(1)	C[+57], N[+1549]	>sp|P02787|TRFE_HUMAN Serotransferrin OS=Homo sapiens OX=9606 GN=TF PE=1 SV=3	Color2 [DarkGray]	1	4		20.4455	20.4332	19.3022	19.2574	19.2064	20.0635
	1.30323	2.00857	K.C[+57.021]GLVPVLAENYN[+1913.677]K.S	HexNAc(4)Hex(5)NeuAc(1)	C[+57], N[+1914]	>sp|P02787|TRFE_HUMAN Serotransferrin OS=Homo sapiens OX=9606 GN=TF PE=1 SV=3	Color2 [DarkGray]	1	4		26.0528	26.2541	26.8629	25.3813	24.6793	23.0835
+	2.7306	4.10224	K.C[+57.021]GLVPVLAENYN[+2204.772]K.S	HexNAc(4)Hex(5)NeuAc(2)	C[+57], N[+2205]	>sp|P02787|TRFE_HUMAN Serotransferrin OS=Homo sapiens OX=9606 GN=TF PE=1 SV=3	Color2 [DarkGray]	1	4		30.8807	31.0604	31.0763	27.8982	26.8424	25.9702
+	2.78697	5.34104	K.C[+57.021]GLVPVLAENYN[+2221.788]K.S	HexNAc(4)Hex(6)Fuc(1)NeuAc(1)	C[+57], N[+2222]	>sp|P02787|TRFE_HUMAN Serotransferrin OS=Homo sapiens OX=9606 GN=TF PE=1 SV=3	Color2 [DarkGray]	1	4		23.3996	24.3048	24.9847	18.6561	19.9109	18.099
	1.00612	2.69852	K.C[+57.021]GLVPVLAENYN[+2278.809]K.S	HexNAc(5)Hex(6)NeuAc(1)	C[+57], N[+2279]	>sp|P02787|TRFE_HUMAN Serotransferrin OS=Homo sapiens OX=9606 GN=TF PE=1 SV=3	Color2 [DarkGray]	1	4		23.2029	23.5438	19.7961	19.4938	20.1521	18.8013
	1.02942	2.1999	K.C[+57.021]GLVPVLAENYN[+2350.830]K.S	HexNAc(4)Hex(5)Fuc(1)NeuAc(2)	C[+57], N[+2351]	>sp|P02787|TRFE_HUMAN Serotransferrin OS=Homo sapiens OX=9606 GN=TF PE=1 SV=3	Color2 [DarkGray]	1	4		19.8679	22.5998	22.967	20.0629	19.3558	19.4164
	0.995605	1.03091	K.C[+57.021]HAGYIGDNC[+57.021]N[+1216.423]C[+57.021]STDISTC[+57.021]R.G	HexNAc(2)Hex(5)	C[+57]*4, N[+1216]	>sp|P18084|ITB5_HUMAN Integrin beta-5 OS=Homo sapiens OX=9606 GN=ITGB5 PE=1 SV=1	Color2 [DarkGray]	1	4		23.3809	23.0258	23.7243	22.1333	23.1952	21.7099
	0.876112	-2.3798	K.C[+57.021]HEGN[+1864.634]GTFEC[+57.021]GAC[+57.021]R.C	HexNAc(2)Hex(9)	C[+57]*3, N[+1865]	>sp|P05556|ITB1_HUMAN Integrin beta-1 OS=Homo sapiens OX=9606 GN=ITGB1 PE=1 SV=2	Color2 [DarkGray]	1	4		19.8003	20.411	20.1055	24.0647	20.0122	23.3793
	0.418446	-1.88374	K.C[+57.021]N[+1768.640]ASSQFLC[+57.021]SSGR.C	HexNAc(4)Hex(5)Fuc(1)	C[+57]*2, N[+1769]	>sp|Q07954|LRP1_HUMAN Prolow-density lipoprotein receptor-related protein 1 OS=Homo sapiens OX=9606 GN=LRP1 PE=1 SV=2	Color2 [DarkGray]	1	4		20.767	19.6053	19.5762	23.6345	18.1145	23.8508
	0.703929	0.540967	K.C[+57.021]N[+2059.735]ASSQFLC[+57.021]SSGR.C	HexNAc(4)Hex(5)Fuc(1)NeuAc(1)	C[+57]*2, N[+2060]	>sp|Q07954|LRP1_HUMAN Prolow-density lipoprotein receptor-related protein 1 OS=Homo sapiens OX=9606 GN=LRP1 PE=1 SV=2	Color2 [DarkGray]	1	4		23.516	22.5381	23.6077	22.6762	22.5496	22.813
	1.65514	1.3347	K.C[+57.021]NM[+15.995]IN[+1702.581]GTDGDSFHPLITK.D	HexNAc(2)Hex(8)	C[+57], M[+16], N[+1703]	>sp|Q14108|SCRB2_HUMAN Lysosome membrane protein 2 OS=Homo sapiens OX=9606 GN=SCARB2 PE=1 SV=2	Color2 [DarkGray]	1	4		24.8569	24.2869	23.9234	23.5028	22.8785	22.6818
	0.620388	-1.30095	K.C[+57.021]NM[+15.995]IN[+1704.635]GTDGDSFHPLITK.D	HexNAc(6)Hex(3)	C[+57], M[+16], N[+1705]	>sp|Q14108|SCRB2_HUMAN Lysosome membrane protein 2 OS=Homo sapiens OX=9606 GN=SCARB2 PE=1 SV=2	Color2 [DarkGray]	1	4		19.9869	17.925	19.942	20.0972	21.8785	19.7811
	0.39589	0.577426	K.C[+57.021]NM[+15.995]IN[+2946.089]GTDGDSFHPLITK.D	HexNAc(9)Hex(6)Fuc(1)	C[+57], M[+16], N[+2946]	>sp|Q14108|SCRB2_HUMAN Lysosome membrane protein 2 OS=Homo sapiens OX=9606 GN=SCARB2 PE=1 SV=2	Color2 [DarkGray]	1	4		20.2156	20.5627	19.0426	19.64	18.5552	19.8934
	0.203678	0.750943	K.C[+57.021]NMIN[+1054.370]GTDGDSFHPLITK.D	HexNAc(2)Hex(4)	C[+57], N[+1054]	>sp|Q14108|SCRB2_HUMAN Lysosome membrane protein 2 OS=Homo sapiens OX=9606 GN=SCARB2 PE=1 SV=2	Color2 [DarkGray]	1	4		18.0747	20.0684	21.9056	20.9893	18.8224	17.9843
	1.42384	2.03853	K.C[+57.021]NMIN[+1216.423]GTDGDSFHPLITK.D	HexNAc(2)Hex(5)	C[+57], N[+1216]	>sp|Q14108|SCRB2_HUMAN Lysosome membrane protein 2 OS=Homo sapiens OX=9606 GN=SCARB2 PE=1 SV=2	Color2 [DarkGray]	1	4		21.4298	21.2679	22.88	19.017	19.9783	20.4667
	1.86171	2.1694	K.C[+57.021]NMIN[+1378.476]GTDGDSFHPLITK.D	HexNAc(2)Hex(6)	C[+57], N[+1378]	>sp|Q14108|SCRB2_HUMAN Lysosome membrane protein 2 OS=Homo sapiens OX=9606 GN=SCARB2 PE=1 SV=2	Color2 [DarkGray]	1	4		22.2641	21.8999	22.1506	20.2246	20.6304	18.9513
+	2.19563	3.0265	K.C[+57.021]NMIN[+1540.529]GTDGDSFHPLITK.D	HexNAc(2)Hex(7)	C[+57], N[+1541]	>sp|Q14108|SCRB2_HUMAN Lysosome membrane protein 2 OS=Homo sapiens OX=9606 GN=SCARB2 PE=1 SV=2	Color2 [DarkGray]	1	4		25.4222	24.9416	26.7799	22.6869	22.3808	22.9965
	1.17256	1.35558	K.C[+57.021]NMIN[+1702.581]GTDGDSFHPLITK.D	HexNAc(2)Hex(8)	C[+57], N[+1703]	>sp|Q14108|SCRB2_HUMAN Lysosome membrane protein 2 OS=Homo sapiens OX=9606 GN=SCARB2 PE=1 SV=2	Color2 [DarkGray]	1	4		28.4434	29.5762	28.7763	26.85	28.329	27.5502
	0.362138	1.46074	K.C[+57.021]NMIN[+1702.581]GTDGDSFHPLITKDEVLYVFPSDFC[+57.021]R.S	HexNAc(2)Hex(8)	C[+57]*2, N[+1703]	>sp|Q14108|SCRB2_HUMAN Lysosome membrane protein 2 OS=Homo sapiens OX=9606 GN=SCARB2 PE=1 SV=2	Color2 [DarkGray]	1	4		23.662	23.6616	23.9387	18.9764	23.4839	24.4198
	0.34357	0.751451	K.C[+57.021]NMIN[+1864.634]GTDGDSFHPLITK.D	HexNAc(2)Hex(9)	C[+57], N[+1865]	>sp|Q14108|SCRB2_HUMAN Lysosome membrane protein 2 OS=Homo sapiens OX=9606 GN=SCARB2 PE=1 SV=2	Color2 [DarkGray]	1	4		24.6184	24.6591	24.5807	22.1711	25.2638	24.169
	0.997259	0.848455	K.C[+57.021]NMIN[+2026.687]GTDGDSFHPLITK.D	HexNAc(2)Hex(10)	C[+57], N[+2027]	>sp|Q14108|SCRB2_HUMAN Lysosome membrane protein 2 OS=Homo sapiens OX=9606 GN=SCARB2 PE=1 SV=2	Color2 [DarkGray]	1	4		20.8138	20.7238	20.5053	20.1101	20.322	19.0654
	1.19793	-4.44978	K.C[+57.021]TDLDEC[+57.021]SN[+1768.640]GTHMC[+57.021]SQHADC[+57.021]K.N	HexNAc(4)Hex(5)Fuc(1)	C[+57]*4, N[+1769]	>sp|P35555|FBN1_HUMAN Fibrillin-1 OS=Homo sapiens OX=9606 GN=FBN1 PE=1 SV=4	Color2 [DarkGray]	1	4		18.6587	18.0725	18.7717	24.688	24.6784	19.4858
	0.502467	2.66035	K.C[+57.021]TDLDEC[+57.021]SN[+2350.830]GTHMC[+57.021]SQHADC[+57.021]K.N	HexNAc(4)Hex(5)Fuc(1)NeuAc(2)	C[+57]*4, N[+2351]	>sp|P35555|FBN1_HUMAN Fibrillin-1 OS=Homo sapiens OX=9606 GN=FBN1 PE=1 SV=4	Color2 [DarkGray]	1	4		24.9583	25.4183	20.6842	18.1578	20.705	24.2169
+	2.12338	-3.45059	K.C[+57.021]VC[+57.021]NYLGTVQEHC[+57.021]N[+1768.640]GSDC[+57.021]QC[+57.021]DK.A	HexNAc(4)Hex(5)Fuc(1)	C[+57]*5, N[+1769]	>sp|P07942|LAMB1_HUMAN Laminin subunit beta-1 OS=Homo sapiens OX=9606 GN=LAMB1 PE=1 SV=2	Color2 [DarkGray]	1	4		18.6208	19.9757	20.1898	24.0129	22.6499	22.4752
	0.0481361	0.109673	K.DAQQDYHLEYAMEN[+1216.423]STHTIIEFTR.E	HexNAc(2)Hex(5)	N[+1216]	>sp|Q6UVY6|MOXD1_HUMAN DBH-like monooxygenase protein 1 OS=Homo sapiens OX=9606 GN=MOXD1 PE=1 SV=1	Color2 [DarkGray]	1	4		20.747	20.7966	20.7753	19.8884	19.8769	22.2246
	0.702529	0.923869	K.DAQQDYHLEYAMEN[+1581.555]STHTIIEFTR.E	HexNAc(3)Hex(6)	N[+1582]	>sp|Q6UVY6|MOXD1_HUMAN DBH-like monooxygenase protein 1 OS=Homo sapiens OX=9606 GN=MOXD1 PE=1 SV=1	Color2 [DarkGray]	1	4		20.5841	20.6211	19.8256	18.4836	19.4181	20.3576
	0.615914	-1.26914	K.DAQQDYHLEYAMEN[+1864.634]STHTIIEFTR.E	HexNAc(2)Hex(9)	N[+1865]	>sp|Q6UVY6|MOXD1_HUMAN DBH-like monooxygenase protein 1 OS=Homo sapiens OX=9606 GN=MOXD1 PE=1 SV=1	Color2 [DarkGray]	1	4		18.869	20.1388	18.83	20.2201	22.1032	19.3219
	0.401518	1.02818	K.DAQQDYHLEYAMEN[+1872.651]STHTIIEFTR.E	HexNAc(3)Hex(6)NeuAc(1)	N[+1873]	>sp|Q6UVY6|MOXD1_HUMAN DBH-like monooxygenase protein 1 OS=Homo sapiens OX=9606 GN=MOXD1 PE=1 SV=1	Color2 [DarkGray]	1	4		21.7693	20.1935	18.3431	18.2448	19.2215	19.755
	0.677982	-0.793086	K.DAVN[+1216.423]C[+57.021]TYKNEDDC[+57.021]VVR.F	HexNAc(2)Hex(5)	C[+57]*2, N[+1216]	>sp|P05106|ITB3_HUMAN Integrin beta-3 OS=Homo sapiens OX=9606 GN=ITGB3 PE=1 SV=2	Color2 [DarkGray]	1	4		19.874	19.8072	18.5337	19.6283	20.2999	20.6659
	1.56563	-0.652423	K.DAVNN[+1702.581]ITAK.G	HexNAc(2)Hex(8)	N[+1703]	>sp|P54289|CA2D1_HUMAN Voltage-dependent calcium channel subunit alpha-2/delta-1 OS=Homo sapiens OX=9606 GN=CACNA2D1 PE=1 SV=3	Color2 [DarkGray]	1	4		22.9617	23.3828	23.3864	24.0278	23.6363	24.024
	0.0180784	0.081433	K.DAVNN[+1864.634]ITAK.G	HexNAc(2)Hex(9)	N[+1865]	>sp|P54289|CA2D1_HUMAN Voltage-dependent calcium channel subunit alpha-2/delta-1 OS=Homo sapiens OX=9606 GN=CACNA2D1 PE=1 SV=3	Color2 [DarkGray]	1	4		19.7782	22.1568	19.0784	19.1152	19.0542	22.5996
	0.242454	0.489471	K.DEGTYTC[+57.021]ALHHSGHSPPISSQN[+1694.603]VTVLR.D	HexNAc(3)Hex(4)Fuc(1)NeuAc(1)	C[+57], N[+1695]	>sp|P04216|THY1_HUMAN Thy-1 membrane glycoprotein OS=Homo sapiens OX=9606 GN=THY1 PE=1 SV=2	Color2 [DarkGray]	1	4		19.2122	21.4975	19.8027	18.8685	20.0482	20.1273
+	3.75607	6.60483	K.DEGTYTC[+57.021]ALHHSGHSPPISSQN[+1768.640]VTVLR.D	HexNAc(4)Hex(5)Fuc(1)	C[+57], N[+1769]	>sp|P04216|THY1_HUMAN Thy-1 membrane glycoprotein OS=Homo sapiens OX=9606 GN=THY1 PE=1 SV=2	Color2 [DarkGray]	1	4		25.9328	26.1488	26.0927	18.5722	20.2484	19.5391
	1.18785	4.50048	K.DEGTYTC[+57.021]ALHHSGHSPPISSQN[+1971.719]VTVLR.D	HexNAc(5)Hex(5)Fuc(1)	C[+57], N[+1972]	>sp|P04216|THY1_HUMAN Thy-1 membrane glycoprotein OS=Homo sapiens OX=9606 GN=THY1 PE=1 SV=2	Color2 [DarkGray]	1	4		25.6094	20.1442	24.8765	19.0526	18.1914	19.8846
+	3.69623	4.03747	K.DEGTYTC[+57.021]ALHHSGHSPPISSQN[+2059.735]VTVLR.D	HexNAc(4)Hex(5)Fuc(1)NeuAc(1)	C[+57], N[+2060]	>sp|P04216|THY1_HUMAN Thy-1 membrane glycoprotein OS=Homo sapiens OX=9606 GN=THY1 PE=1 SV=2	Color2 [DarkGray]	1	4		27.7991	27.4492	27.6644	23.6678	24.0705	23.0621
+	4.89601	7.82536	K.DEGTYTC[+57.021]ALHHSGHSPPISSQN[+2350.830]VTVLR.D	HexNAc(4)Hex(5)Fuc(1)NeuAc(2)	C[+57], N[+2351]	>sp|P04216|THY1_HUMAN Thy-1 membrane glycoprotein OS=Homo sapiens OX=9606 GN=THY1 PE=1 SV=2	Color2 [DarkGray]	1	4		27.0862	26.4553	27.3597	19.0179	18.9988	19.4085
	0.175098	1.46978	K.DFVN[+2204.772]ASSK.Y	HexNAc(4)Hex(5)NeuAc(2)	N[+2205]	>sp|P05546|HEP2_HUMAN Heparin cofactor 2 OS=Homo sapiens OX=9606 GN=SERPIND1 PE=1 SV=3	Color2 [DarkGray]	1	4		19.3737	26.694	18.8438	18.7242	17.7951	23.9828
+	2.65998	4.00309	K.DGSDEPGTAAC[+57.021]PN[+1378.476]GSFHC[+57.021]TNTGYKPLYIPSNR.V	HexNAc(2)Hex(6)	C[+57]*2, N[+1378]	>sp|P14314|GLU2B_HUMAN Glucosidase 2 subunit beta OS=Homo sapiens OX=9606 GN=PRKCSH PE=1 SV=2	Color2 [DarkGray]	1	4		27.3667	25.5029	25.8587	22.262	22.2545	22.2025
+	2.77598	4.62916	K.DHN[+2059.735]ATSILQQLPLLSAMR.E	HexNAc(4)Hex(5)Fuc(1)NeuAc(1)	N[+2060]	>sp|Q8TDL5|BPIB1_HUMAN BPI fold-containing family B member 1 OS=Homo sapiens OX=9606 GN=BPIFB1 PE=1 SV=1	Color2 [DarkGray]	1	4		23.3962	24.3148	25.0973	19.7499	20.2204	18.9505
	0.290126	0.899018	K.DHN[+2350.830]ATSILQQLPLLSAM[+15.995]R.E	HexNAc(4)Hex(5)Fuc(1)NeuAc(2)	M[+16], N[+2351]	>sp|Q8TDL5|BPIB1_HUMAN BPI fold-containing family B member 1 OS=Homo sapiens OX=9606 GN=BPIFB1 PE=1 SV=1	Color2 [DarkGray]	1	4		19.0722	22.644	18.9543	19.3446	19.8726	18.7562
+	3.24995	8.08356	K.DHN[+2350.830]ATSILQQLPLLSAMR.E	HexNAc(4)Hex(5)Fuc(1)NeuAc(2)	N[+2351]	>sp|Q8TDL5|BPIB1_HUMAN BPI fold-containing family B member 1 OS=Homo sapiens OX=9606 GN=BPIFB1 PE=1 SV=1	Color2 [DarkGray]	1	4		28.0302	28.8888	28.844	19.8034	22.0203	19.6886
	0.0489598	0.149734	K.DHN[+2391.857]ATSILQQLPLLSAMR.E	HexNAc(5)Hex(4)Fuc(1)NeuAc(2)	N[+2392]	>sp|Q8TDL5|BPIB1_HUMAN BPI fold-containing family B member 1 OS=Homo sapiens OX=9606 GN=BPIFB1 PE=1 SV=1	Color2 [DarkGray]	1	4		21.5633	18.3937	19.0232	20.0204	18.7171	19.7936
	0.167169	0.470531	K.DHN[+2424.867]ATSILQQLPLLSAMR.E	HexNAc(5)Hex(6)Fuc(1)NeuAc(1)	N[+2425]	>sp|Q8TDL5|BPIB1_HUMAN BPI fold-containing family B member 1 OS=Homo sapiens OX=9606 GN=BPIFB1 PE=1 SV=1	Color2 [DarkGray]	1	4		19.5651	19.2037	22.4568	19.9648	19.4764	20.3728
	1.02344	2.8038	K.DHN[+2715.963]ATSILQQLPLLSAMR.E	HexNAc(5)Hex(6)Fuc(1)NeuAc(2)	N[+2716]	>sp|Q8TDL5|BPIB1_HUMAN BPI fold-containing family B member 1 OS=Homo sapiens OX=9606 GN=BPIFB1 PE=1 SV=1	Color2 [DarkGray]	1	4		19.6599	22.6912	23.6059	20.1297	18.8587	18.5572
+	3.29988	4.67212	K.DHN[+3007.058]ATSILQQLPLLSAMR.E	HexNAc(5)Hex(6)Fuc(1)NeuAc(3)	N[+3007]	>sp|Q8TDL5|BPIB1_HUMAN BPI fold-containing family B member 1 OS=Homo sapiens OX=9606 GN=BPIFB1 PE=1 SV=1	Color2 [DarkGray]	1	4		23.7854	24.4074	24.4117	19.5202	20.2321	18.8358
+	2.63462	3.65666	K.DIEC[+57.021]QAESFPN[+1378.476]WTLAQVGQK.V	HexNAc(2)Hex(6)	C[+57], N[+1378]	>sp|Q9HC84|MUC5B_HUMAN Mucin-5B OS=Homo sapiens OX=9606 GN=MUC5B PE=1 SV=3	Color2 [DarkGray]	1	4		22.966	21.986	22.569	19.7363	18.517	18.2978
+	2.96023	2.41899	K.DIEC[+57.021]QAESFPN[+1540.529]WTLAQVGQK.V	HexNAc(2)Hex(7)	C[+57], N[+1541]	>sp|Q9HC84|MUC5B_HUMAN Mucin-5B OS=Homo sapiens OX=9606 GN=MUC5B PE=1 SV=3	Color2 [DarkGray]	1	4		22.0673	21.3413	21.5874	18.9973	19.6269	19.1149
	0.826392	1.78475	K.DIEC[+57.021]QAESFPN[+1694.603]WTLAQVGQK.V	HexNAc(3)Hex(4)Fuc(1)NeuAc(1)	C[+57], N[+1695]	>sp|Q9HC84|MUC5B_HUMAN Mucin-5B OS=Homo sapiens OX=9606 GN=MUC5B PE=1 SV=3	Color2 [DarkGray]	1	4		20.6553	22.6267	19.3936	19.2534	18.4559	19.6121
+	3.14313	4.16746	K.DIEC[+57.021]QAESFPN[+1702.581]WTLAQVGQK.V	HexNAc(2)Hex(8)	C[+57], N[+1703]	>sp|Q9HC84|MUC5B_HUMAN Mucin-5B OS=Homo sapiens OX=9606 GN=MUC5B PE=1 SV=3	Color2 [DarkGray]	1	4		23.8663	23.362	23.9271	19.2899	20.3483	19.0147
+	3.85985	5.81368	K.DIEC[+57.021]QAESFPN[+1768.640]WTLAQVGQK.V	HexNAc(4)Hex(5)Fuc(1)	C[+57], N[+1769]	>sp|Q9HC84|MUC5B_HUMAN Mucin-5B OS=Homo sapiens OX=9606 GN=MUC5B PE=1 SV=3	Color2 [DarkGray]	1	4		25.1283	25.2967	26.1088	19.7228	19.217	20.1529
	0.405547	0.899384	K.DIEC[+57.021]QAESFPN[+1864.634]WTLAQVGQK.V	HexNAc(2)Hex(9)	C[+57], N[+1865]	>sp|Q9HC84|MUC5B_HUMAN Mucin-5B OS=Homo sapiens OX=9606 GN=MUC5B PE=1 SV=3	Color2 [DarkGray]	1	4		18.7944	21.195	21.3091	18.9837	19.1681	20.4486
	0.0315314	-0.0483386	K.DIEC[+57.021]QAESFPN[+1866.688]WTLAQVGQK.V	HexNAc(6)Hex(4)	C[+57], N[+1867]	>sp|Q9HC84|MUC5B_HUMAN Mucin-5B OS=Homo sapiens OX=9606 GN=MUC5B PE=1 SV=3	Color2 [DarkGray]	1	4		17.8712	18.3601	19.4731	19.0262	18.4466	18.3766
+	2.20434	3.55402	K.DIEC[+57.021]QAESFPN[+1897.682]WTLAQVGQK.V	HexNAc(4)Hex(4)Fuc(1)NeuAc(1)	C[+57], N[+1898]	>sp|Q9HC84|MUC5B_HUMAN Mucin-5B OS=Homo sapiens OX=9606 GN=MUC5B PE=1 SV=3	Color2 [DarkGray]	1	4		24.172	22.1408	22.3752	18.933	19.638	19.4549
+	3.44797	8.54086	K.DIEC[+57.021]QAESFPN[+2059.735]WTLAQVGQK.V	HexNAc(4)Hex(5)Fuc(1)NeuAc(1)	C[+57], N[+2060]	>sp|Q9HC84|MUC5B_HUMAN Mucin-5B OS=Homo sapiens OX=9606 GN=MUC5B PE=1 SV=3	Color2 [DarkGray]	1	4		27.6797	28.2775	28.5407	18.8953	18.9237	21.0563
+	4.0864	4.74069	K.DIEC[+57.021]QAESFPN[+2100.761]WTLAQVGQK.V	HexNAc(5)Hex(4)Fuc(1)NeuAc(1)	C[+57], N[+2101]	>sp|Q9HC84|MUC5B_HUMAN Mucin-5B OS=Homo sapiens OX=9606 GN=MUC5B PE=1 SV=3	Color2 [DarkGray]	1	4		24.0593	24.1566	24.1884	18.8953	19.396	19.8909
	0.654929	1.10484	K.DIEC[+57.021]QAESFPN[+2157.783]WTLAQVGQK.V	HexNAc(6)Hex(4)NeuAc(1)	C[+57], N[+2158]	>sp|Q9HC84|MUC5B_HUMAN Mucin-5B OS=Homo sapiens OX=9606 GN=MUC5B PE=1 SV=3	Color2 [DarkGray]	1	4		20.3187	20.3546	22.5866	20.2594	19.8922	19.7939
	0.601783	2.64737	K.DIEC[+57.021]QAESFPN[+2204.772]WTLAQVGQK.V	HexNAc(4)Hex(5)NeuAc(2)	C[+57], N[+2205]	>sp|Q9HC84|MUC5B_HUMAN Mucin-5B OS=Homo sapiens OX=9606 GN=MUC5B PE=1 SV=3	Color2 [DarkGray]	1	4		20.5048	24.8212	18.3755	17.5515	18.8725	19.3355
	0.320412	0.942475	K.DIEC[+57.021]QAESFPN[+2221.788]WTLAQVGQK.V	HexNAc(4)Hex(6)Fuc(1)NeuAc(1)	C[+57], N[+2222]	>sp|Q9HC84|MUC5B_HUMAN Mucin-5B OS=Homo sapiens OX=9606 GN=MUC5B PE=1 SV=3	Color2 [DarkGray]	1	4		21.5478	18.4207	21.67	18.4817	20.3296	19.9998
+	4.49514	9.95194	K.DIEC[+57.021]QAESFPN[+2350.830]WTLAQVGQK.V	HexNAc(4)Hex(5)Fuc(1)NeuAc(2)	C[+57], N[+2351]	>sp|Q9HC84|MUC5B_HUMAN Mucin-5B OS=Homo sapiens OX=9606 GN=MUC5B PE=1 SV=3	Color2 [DarkGray]	1	4		28.3946	28.6963	29.4743	18.5848	19.6144	18.5101
	0.215404	0.395897	K.DIEC[+57.021]QAESFPN[+2352.846]WTLAQVGQK.V	HexNAc(6)Hex(7)	C[+57], N[+2353]	>sp|Q9HC84|MUC5B_HUMAN Mucin-5B OS=Homo sapiens OX=9606 GN=MUC5B PE=1 SV=3	Color2 [DarkGray]	1	4		20.5654	18.8712	21.0098	20.0739	19.168	20.0168
	1.1322	3.63025	K.DIEC[+57.021]QAESFPN[+2391.857]WTLAQVGQK.V	HexNAc(5)Hex(4)Fuc(1)NeuAc(2)	C[+57], N[+2392]	>sp|Q9HC84|MUC5B_HUMAN Mucin-5B OS=Homo sapiens OX=9606 GN=MUC5B PE=1 SV=3	Color2 [DarkGray]	1	4		24.5104	24.7265	20.2207	19.7151	18.8471	20.0046
+	3.29812	3.62842	K.DIEC[+57.021]QAESFPN[+2424.867]WTLAQVGQK.V	HexNAc(5)Hex(6)Fuc(1)NeuAc(1)	C[+57], N[+2425]	>sp|Q9HC84|MUC5B_HUMAN Mucin-5B OS=Homo sapiens OX=9606 GN=MUC5B PE=1 SV=3	Color2 [DarkGray]	1	4		22.9013	23.3072	23.2557	19.0636	20.1623	19.353
	0.834919	1.41288	K.DIVEYYNDSN[+1241.454]GSHVLQGR.F	HexNAc(3)Hex(3)Fuc(1)	N[+1241]	>sp|P25311|ZA2G_HUMAN Zinc-alpha-2-glycoprotein OS=Homo sapiens OX=9606 GN=AZGP1 PE=1 SV=2	Color2 [DarkGray]	1	4		20.8818	22.084	19.5586	18.9362	19.9412	19.4083
+	2.96007	4.84526	K.DIVEYYNDSN[+2204.772]GSHVLQGR.F	HexNAc(4)Hex(5)NeuAc(2)	N[+2205]	>sp|P25311|ZA2G_HUMAN Zinc-alpha-2-glycoprotein OS=Homo sapiens OX=9606 GN=AZGP1 PE=1 SV=2	Color2 [DarkGray]	1	4		23.3533	23.7523	23.8466	18.4247	19.9011	18.0906
	0.503897	1.81734	K.DIVEYYNDSN[+2350.830]GSHVLQGR.F	HexNAc(4)Hex(5)Fuc(1)NeuAc(2)	N[+2351]	>sp|P25311|ZA2G_HUMAN Zinc-alpha-2-glycoprotein OS=Homo sapiens OX=9606 GN=AZGP1 PE=1 SV=2	Color2 [DarkGray]	1	4		23.3981	22.8895	18.5226	19.1751	20.0861	20.097
	0.411285	0.67525	K.DIVEYYNDSN[+2861.000]GSHVLQGR.F	HexNAc(5)Hex(6)NeuAc(3)	N[+2861]	>sp|P25311|ZA2G_HUMAN Zinc-alpha-2-glycoprotein OS=Homo sapiens OX=9606 GN=AZGP1 PE=1 SV=2	Color2 [DarkGray]	1	4		18.9239	20.8964	20.73	19.0589	20.0673	19.3983
	0.726176	1.74576	K.DLEITN[+1378.476]ATLQSEEDSR.Y	HexNAc(2)Hex(6)	N[+1378]	>sp|Q6P179|ERAP2_HUMAN Endoplasmic reticulum aminopeptidase 2 OS=Homo sapiens OX=9606 GN=ERAP2 PE=1 SV=2	Color2 [DarkGray]	1	4		21.1543	23.098	23.4639	21.8134	21.4996	19.1659
	0.305331	0.953347	K.DLMVIN[+1702.581]R.S	HexNAc(2)Hex(8)	N[+1703]	>sp|Q96KA5|CLP1L_HUMAN Cleft lip and palate transmembrane protein 1-like protein OS=Homo sapiens OX=9606 GN=CLPTM1L PE=1 SV=1	Color2 [DarkGray]	1	4		23.6791	19.7723	23.4753	21.483	21.3353	21.2483
	1.21521	1.35903	K.DLN[+1378.476]ETIHYMYK.H	HexNAc(2)Hex(6)	N[+1378]	>sp|Q99538|LGMN_HUMAN Legumain OS=Homo sapiens OX=9606 GN=LGMN PE=1 SV=1	Color2 [DarkGray]	1	4		21.0776	19.9028	20.9718	19.2316	19.9569	18.6867
	0.729144	3.28303	K.DLN[+1540.529]ETIHYM[+15.995]YK.H	HexNAc(2)Hex(7)	M[+16], N[+1541]	>sp|Q99538|LGMN_HUMAN Legumain OS=Homo sapiens OX=9606 GN=LGMN PE=1 SV=1	Color2 [DarkGray]	1	4		24.107	18.3737	24.69	18.2655	19.7293	19.3268
	1.72367	4.22835	K.DLN[+1540.529]ETIHYMYK.H	HexNAc(2)Hex(7)	N[+1541]	>sp|Q99538|LGMN_HUMAN Legumain OS=Homo sapiens OX=9606 GN=LGMN PE=1 SV=1	Color2 [DarkGray]	1	4		28.4393	25.1452	28.3027	23.6038	22.8224	22.776
	1.49783	1.78876	K.DLNGNVFQDAVFN[+1378.476]QTVTVIER.E	HexNAc(2)Hex(6)	N[+1378]	>sp|P43307|SSRA_HUMAN Translocon-associated protein subunit alpha OS=Homo sapiens OX=9606 GN=SSR1 PE=1 SV=3	Color2 [DarkGray]	1	4		20.7818	20.7355	21.0661	19.5765	17.9874	19.6532
+	2.52	3.13232	K.DLNGNVFQDAVFN[+1540.529]QTVTVIER.E	HexNAc(2)Hex(7)	N[+1541]	>sp|P43307|SSRA_HUMAN Translocon-associated protein subunit alpha OS=Homo sapiens OX=9606 GN=SSR1 PE=1 SV=3	Color2 [DarkGray]	1	4		23.094	22.5266	24.0732	20.4661	19.9034	19.9273
+	2.21789	3.09588	K.DLNGNVFQDAVFN[+1702.581]QTVTVIER.E	HexNAc(2)Hex(8)	N[+1703]	>sp|P43307|SSRA_HUMAN Translocon-associated protein subunit alpha OS=Homo sapiens OX=9606 GN=SSR1 PE=1 SV=3	Color2 [DarkGray]	1	4		24.466	23.5389	24.7844	20.2791	21.7132	21.5094
	2.28189	1.74875	K.DLNGNVFQDAVFN[+1864.634]QTVTVIER.E	HexNAc(2)Hex(9)	N[+1865]	>sp|P43307|SSRA_HUMAN Translocon-associated protein subunit alpha OS=Homo sapiens OX=9606 GN=SSR1 PE=1 SV=3	Color2 [DarkGray]	1	4		22.5729	22.9323	22.82	20.5396	20.9721	21.5673
	0.586564	-0.935759	K.DLQSLEDILHQVEN[+1913.677]K.T	HexNAc(4)Hex(5)NeuAc(1)	N[+1914]	>sp|P02679|FIBG_HUMAN Fibrinogen gamma chain OS=Homo sapiens OX=9606 GN=FGG PE=1 SV=3	Color2 [DarkGray]	1	4		23.9486	24.69	24.7374	25.7293	26.3412	24.1129
	0.459862	-1.49769	K.DLQSLEDILHQVEN[+2204.772]K.T	HexNAc(4)Hex(5)NeuAc(2)	N[+2205]	>sp|P02679|FIBG_HUMAN Fibrinogen gamma chain OS=Homo sapiens OX=9606 GN=FGG PE=1 SV=3	Color2 [DarkGray]	1	4		19.2964	19.1945	18.0683	19.3575	23.0216	18.6732
	0.0762581	0.117434	K.DM[+15.995]SDGFISN[+1864.634]LTIQR.Q	HexNAc(2)Hex(9)	M[+16], N[+1865]	>sp|P13674|P4HA1_HUMAN Prolyl 4-hydroxylase subunit alpha-1 OS=Homo sapiens OX=9606 GN=P4HA1 PE=1 SV=2	Color2 [DarkGray]	1	4		20.4732	19.2662	19.1424	18.8511	19.9579	19.7205
	0.0417693	0.0889409	K.DMSDGFISN[+1540.529]LTIQR.Q	HexNAc(2)Hex(7)	N[+1541]	>sp|P13674|P4HA1_HUMAN Prolyl 4-hydroxylase subunit alpha-1 OS=Homo sapiens OX=9606 GN=P4HA1 PE=1 SV=2	Color2 [DarkGray]	1	4		18.8291	19.3651	21.0131	20.2597	19.3611	19.3196
+	2.47066	3.21987	K.DMSDGFISN[+1702.581]LTIQR.Q	HexNAc(2)Hex(8)	N[+1703]	>sp|P13674|P4HA1_HUMAN Prolyl 4-hydroxylase subunit alpha-1 OS=Homo sapiens OX=9606 GN=P4HA1 PE=1 SV=2	Color2 [DarkGray]	1	4		23.8043	23.0216	22.6624	19.1639	20.4069	20.2579
	0.0559877	0.108115	K.DMSDGFISN[+1864.634]LTIQR.Q	HexNAc(2)Hex(9)	N[+1865]	>sp|P13674|P4HA1_HUMAN Prolyl 4-hydroxylase subunit alpha-1 OS=Homo sapiens OX=9606 GN=P4HA1 PE=1 SV=2	Color2 [DarkGray]	1	4		24.092	24.3336	23.5338	25.1092	23.4337	23.0922
	0.935103	1.94801	K.DMVTYFMN[+2407.852]LSQANAQGTPR.W	HexNAc(5)Hex(5)NeuAc(2)	N[+2408]	>sp|Q92485|ASM3B_HUMAN Acid sphingomyelinase-like phosphodiesterase 3b OS=Homo sapiens OX=9606 GN=SMPDL3B PE=1 SV=2	Color2 [DarkGray]	1	4		19.2699	20.9282	22.0646	17.7367	19.4546	19.2274
	1.38825	2.47208	K.DN[+1702.581]ATDSVPLR.T	HexNAc(2)Hex(8)	N[+1703]	>sp|Q07954|LRP1_HUMAN Prolow-density lipoprotein receptor-related protein 1 OS=Homo sapiens OX=9606 GN=LRP1 PE=1 SV=2	Color2 [DarkGray]	1	4		22.1761	19.8802	22.5139	18.9255	19.1821	19.0463
	0.652207	1.60115	K.DN[+1702.581]ATEEEILVYLEK.T	HexNAc(2)Hex(8)	N[+1703]	>sp|P07602|SAP_HUMAN Prosaposin OS=Homo sapiens OX=9606 GN=PSAP PE=1 SV=2	Color2 [DarkGray]	1	4		21.8674	22.7747	19.086	19.7118	19.5872	19.6256
	0.748463	1.44988	K.DN[+1864.634]ATDSVPLR.T	HexNAc(2)Hex(9)	N[+1865]	>sp|Q07954|LRP1_HUMAN Prolow-density lipoprotein receptor-related protein 1 OS=Homo sapiens OX=9606 GN=LRP1 PE=1 SV=2	Color2 [DarkGray]	1	4		19.1453	20.8888	22.1408	19.6024	18.9376	19.2852
	1.39252	1.50353	K.DN[+1864.634]ATEEEILVYLEK.T	HexNAc(2)Hex(9)	N[+1865]	>sp|P07602|SAP_HUMAN Prosaposin OS=Homo sapiens OX=9606 GN=PSAP PE=1 SV=2	Color2 [DarkGray]	1	4		20.6371	21.6425	20.4838	18.8735	19.3123	20.067
	0.281933	0.988656	K.DNGQAPFTITPVFSDFPVHGMEPMNN[+1540.529]ATK.G	HexNAc(2)Hex(7)	N[+1541]	>sp|O15118|NPC1_HUMAN NPC intracellular cholesterol transporter 1 OS=Homo sapiens OX=9606 GN=NPC1 PE=1 SV=2	Color2 [DarkGray]	1	4		19.4032	22.5824	17.8007	19.0674	19.0956	18.6573
	0.446498	1.19688	K.DNGQAPFTITPVFSDFPVHGMEPMNN[+1702.581]ATK.G	HexNAc(2)Hex(8)	N[+1703]	>sp|O15118|NPC1_HUMAN NPC intracellular cholesterol transporter 1 OS=Homo sapiens OX=9606 GN=NPC1 PE=1 SV=2	Color2 [DarkGray]	1	4		18.5175	21.8008	21.729	19.8797	18.6954	19.8815
	1.83831	-2.3732	K.DPAGWLNINPIN[+2059.735]GTVDTTAVLDR.E	HexNAc(4)Hex(5)Fuc(1)NeuAc(1)	N[+2060]	>sp|P55290|CAD13_HUMAN Cadherin-13 OS=Homo sapiens OX=9606 GN=CDH13 PE=1 SV=1	Color2 [DarkGray]	1	4		20.737	19.2496	19.958	21.6348	22.9363	22.4931
+	2.00414	-3.94947	K.DPAGWLNINPIN[+2350.830]GTVDTTAVLDR.E	HexNAc(4)Hex(5)Fuc(1)NeuAc(2)	N[+2351]	>sp|P55290|CAD13_HUMAN Cadherin-13 OS=Homo sapiens OX=9606 GN=CDH13 PE=1 SV=1	Color2 [DarkGray]	1	4		19.5907	19.4076	20.603	24.6279	22.2764	24.5454
	0.245223	-0.801879	K.DPAGWLNINPIN[+3007.058]GTVDTTAVLDR.E	HexNAc(5)Hex(6)Fuc(1)NeuAc(3)	N[+3007]	>sp|P55290|CAD13_HUMAN Cadherin-13 OS=Homo sapiens OX=9606 GN=CDH13 PE=1 SV=1	Color2 [DarkGray]	1	4		20.2071	19.6356	18.5616	19.1803	18.9648	22.6648
+	2.62429	-5.57952	K.DQNTPVVHPPPTPGSC[+57.021]GHGGVVN[+2059.735]ISKPSVVQLNWR.G	HexNAc(4)Hex(5)Fuc(1)NeuAc(1)	C[+57], N[+2060]	>sp|Q6UX06|OLFM4_HUMAN Olfactomedin-4 OS=Homo sapiens OX=9606 GN=OLFM4 PE=1 SV=1	Color2 [DarkGray]	1	4		20.6044	17.9697	19.6754	24.6662	25.5104	24.8115
	0.0223866	-0.218039	K.DSC[+57.021]ESNHN[+1540.529]ITC[+57.021]K.V	HexNAc(2)Hex(7)	C[+57]*2, N[+1541]	>sp|P56199|ITA1_HUMAN Integrin alpha-1 OS=Homo sapiens OX=9606 GN=ITGA1 PE=1 SV=2	Color2 [DarkGray]	1	4		18.6813	19.6039	25.7734	19.7284	18.7095	26.2749
	1.17465	-4.5239	K.DSC[+57.021]ESNHN[+1702.581]ITC[+57.021]K.V	HexNAc(2)Hex(8)	C[+57]*2, N[+1703]	>sp|P56199|ITA1_HUMAN Integrin alpha-1 OS=Homo sapiens OX=9606 GN=ITGA1 PE=1 SV=2	Color2 [DarkGray]	1	4		19.0669	20.0532	24.8913	25.6747	25.6483	26.2602
	0.913522	1.12754	K.DSC[+57.021]ESNHN[+1864.634]ITC[+57.021]K.V	HexNAc(2)Hex(9)	C[+57]*2, N[+1865]	>sp|P56199|ITA1_HUMAN Integrin alpha-1 OS=Homo sapiens OX=9606 GN=ITGA1 PE=1 SV=2	Color2 [DarkGray]	1	4		19.8541	19.248	21.1305	19.2577	18.8396	18.7526
	0.19921	-0.567849	K.DSLN[+1378.476]SSRPISK.P	HexNAc(2)Hex(6)	N[+1378]	>sp|Q6P179|ERAP2_HUMAN Endoplasmic reticulum aminopeptidase 2 OS=Homo sapiens OX=9606 GN=ERAP2 PE=1 SV=2	Color2 [DarkGray]	1	4		19.3998	20.46	19.6575	19.1888	19.5349	22.497
	0.696531	1.33521	K.DSLN[+1702.581]SSHPISSSVQSSEQIEEMFDSLSYFK.G	HexNAc(2)Hex(8)	N[+1703]	>sp|Q9UIQ6|LCAP_HUMAN Leucyl-cystinyl aminopeptidase OS=Homo sapiens OX=9606 GN=LNPEP PE=1 SV=3	Color2 [DarkGray]	1	4		20.525	21.4337	21.6837	18.704	21.4057	19.5271
	0.952218	4.91012	K.DSLN[+1702.581]SSRPISK.P	HexNAc(2)Hex(8)	N[+1703]	>sp|Q6P179|ERAP2_HUMAN Endoplasmic reticulum aminopeptidase 2 OS=Homo sapiens OX=9606 GN=ERAP2 PE=1 SV=2	Color2 [DarkGray]	1	4		19.4017	26.384	26.7769	19.0484	18.9265	19.8573
	0.403613	0.873239	K.DSLN[+1864.634]SSHPISSSVQSSEQIEEMFDSLSYFK.G	HexNAc(2)Hex(9)	N[+1865]	>sp|Q9UIQ6|LCAP_HUMAN Leucyl-cystinyl aminopeptidase OS=Homo sapiens OX=9606 GN=LNPEP PE=1 SV=3	Color2 [DarkGray]	1	4		19.374	21.1661	21.2637	19.3034	21.0604	18.8203
	0.826565	3.56249	K.DSLN[+1864.634]SSRPISK.P	HexNAc(2)Hex(9)	N[+1865]	>sp|Q6P179|ERAP2_HUMAN Endoplasmic reticulum aminopeptidase 2 OS=Homo sapiens OX=9606 GN=ERAP2 PE=1 SV=2	Color2 [DarkGray]	1	4		24.8721	18.9233	24.7129	19.4015	19.8947	18.5245
+	2.18559	5.33336	K.DSLSIN[+1378.476]ATNIK.H	HexNAc(2)Hex(6)	N[+1378]	>sp|P00533|EGFR_HUMAN Epidermal growth factor receptor OS=Homo sapiens OX=9606 GN=EGFR PE=1 SV=2	Color2 [DarkGray]	1	4		24.7266	22.2943	24.9069	17.5682	18.7764	19.5831
	0.813151	2.86985	K.DSLSINATNIKHFKN[+2272.846]C[+57.021]TSISGDLHILPVAFR.G	HexNAc(8)Hex(4)	C[+57], N[+2273]	>sp|P00533|EGFR_HUMAN Epidermal growth factor receptor OS=Homo sapiens OX=9606 GN=EGFR PE=1 SV=2	Color2 [DarkGray]	1	4		23.9775	24.6702	19.4764	19.9655	19.5758	19.9734
	0.81342	-2.18033	K.DSSGVIHVMLN[+1378.476]GSEPTGAYPIK.G	HexNAc(2)Hex(6)	N[+1378]	>sp|Q10588|BST1_HUMAN ADP-ribosyl cyclase/cyclic ADP-ribose hydrolase 2 OS=Homo sapiens OX=9606 GN=BST1 PE=1 SV=2	Color2 [DarkGray]	1	4		23.1027	22.6905	26.5543	25.9066	26.4559	26.5259
	1.64048	-4.33915	K.DSSGVIHVMLN[+1540.529]GSEPTGAYPIK.G	HexNAc(2)Hex(7)	N[+1541]	>sp|Q10588|BST1_HUMAN ADP-ribosyl cyclase/cyclic ADP-ribose hydrolase 2 OS=Homo sapiens OX=9606 GN=BST1 PE=1 SV=2	Color2 [DarkGray]	1	4		23.5482	20.16	23.5489	27.5121	26.7272	26.0353
	0.0415043	-0.221041	K.DSSGVIHVMLN[+1702.581]GSEPTGAYPIK.G	HexNAc(2)Hex(8)	N[+1703]	>sp|Q10588|BST1_HUMAN ADP-ribosyl cyclase/cyclic ADP-ribose hydrolase 2 OS=Homo sapiens OX=9606 GN=BST1 PE=1 SV=2	Color2 [DarkGray]	1	4		21.9816	23.2583	22.8709	24.4433	24.9413	19.3894
	0.0669967	-0.266364	K.DSSGVIHVMLN[+1704.635]GSEPTGAYPIK.G	HexNAc(6)Hex(3)	N[+1705]	>sp|Q10588|BST1_HUMAN ADP-ribosyl cyclase/cyclic ADP-ribose hydrolase 2 OS=Homo sapiens OX=9606 GN=BST1 PE=1 SV=2	Color2 [DarkGray]	1	4		19.9868	22.185	20.0424	23.3657	19.693	19.9547
	0.318535	-0.712118	K.DSTPLGDGPM[+15.995]LSLSSITFDSN[+1704.635]GTYVC[+57.021]EASLPTVPVLSR.T	HexNAc(6)Hex(3)	C[+57], M[+16], N[+1705]	>sp|P50895|BCAM_HUMAN Basal cell adhesion molecule OS=Homo sapiens OX=9606 GN=BCAM PE=1 SV=2	Color2 [DarkGray]	1	4		18.5754	19.4581	20.9146	20.5052	21.3409	19.2383
	0.9111	0.664773	K.DTC[+57.021]TQEC[+57.021]SYFN[+1378.476]ITK.V	HexNAc(2)Hex(6)	C[+57]*2, N[+1378]	>sp|P05556|ITB1_HUMAN Integrin beta-1 OS=Homo sapiens OX=9606 GN=ITGB1 PE=1 SV=2	Color2 [DarkGray]	1	4		20.3471	19.9177	20.2783	19.7687	19.8871	18.893
	0.0351187	0.0581106	K.DTC[+57.021]TQEC[+57.021]SYFN[+1864.634]ITK.V	HexNAc(2)Hex(9)	C[+57]*2, N[+1865]	>sp|P05556|ITB1_HUMAN Integrin beta-1 OS=Homo sapiens OX=9606 GN=ITGB1 PE=1 SV=2	Color2 [DarkGray]	1	4		18.9072	19.3826	20.3186	20.1634	18.8667	19.404
	0.145765	-0.653805	K.DTC[+57.021]TQEC[+57.021]SYFN[+2059.735]ITK.V	HexNAc(4)Hex(5)Fuc(1)NeuAc(1)	C[+57]*2, N[+2060]	>sp|P05556|ITB1_HUMAN Integrin beta-1 OS=Homo sapiens OX=9606 GN=ITGB1 PE=1 SV=2	Color2 [DarkGray]	1	4		19.577	19.1931	19.2413	22.1095	21.151	16.7124
+	3.59491	-5.13685	K.DTGKDAVN[+1216.423]C[+57.021]TYK.N	HexNAc(2)Hex(5)	C[+57], N[+1216]	>sp|P05106|ITB3_HUMAN Integrin beta-3 OS=Homo sapiens OX=9606 GN=ITGB3 PE=1 SV=2	Color2 [DarkGray]	1	4		19.7242	18.995	19.0685	24.686	24.8073	23.7049
	0.345165	-1.75417	K.DVASEVN[+3575.270]LTAYK.P	HexNAc(7)Hex(7)Fuc(1)NeuAc(3)	N[+3575]	>sp|Q9H501|ESF1_HUMAN ESF1 homolog OS=Homo sapiens OX=9606 GN=ESF1 PE=1 SV=1	Color2 [DarkGray]	1	4		18.8434	19.0104	19.9478	19.5882	25.1156	18.3603
	0.351781	1.47666	K.DVDEC[+57.021]ALGTHN[+1241.454]C[+57.021]SEAETC[+57.021]HNIQGSFR.C	HexNAc(3)Hex(3)Fuc(1)	C[+57]*3, N[+1241]	>sp|P98095|FBLN2_HUMAN Fibulin-2 OS=Homo sapiens OX=9606 GN=FBLN2 PE=1 SV=2	Color2 [DarkGray]	1	4		23.3985	19.3397	17.5149	18.3943	18.5688	18.8599
	1.12239	-1.19889	K.DVDEC[+57.021]ALGTHN[+1403.507]C[+57.021]SEAETC[+57.021]HNIQGSFR.C	HexNAc(3)Hex(4)Fuc(1)	C[+57]*3, N[+1404]	>sp|P98095|FBLN2_HUMAN Fibulin-2 OS=Homo sapiens OX=9606 GN=FBLN2 PE=1 SV=2	Color2 [DarkGray]	1	4		24.3147	23.7639	23.8023	25.5124	25.7368	24.2283
+	3.37757	2.95741	K.DVDEC[+57.021]ALGTHN[+1565.560]C[+57.021]SEAETC[+57.021]HNIQGSFR.C	HexNAc(3)Hex(5)Fuc(1)	C[+57]*3, N[+1566]	>sp|P98095|FBLN2_HUMAN Fibulin-2 OS=Homo sapiens OX=9606 GN=FBLN2 PE=1 SV=2	Color2 [DarkGray]	1	4		22.446	22.0152	21.7989	18.8038	19.0981	19.486
	0.262672	1.02914	K.DVDEC[+57.021]ALGTHN[+1606.587]C[+57.021]SEAETC[+57.021]HNIQGSFR.C	HexNAc(4)Hex(4)Fuc(1)	C[+57]*3, N[+1607]	>sp|P98095|FBLN2_HUMAN Fibulin-2 OS=Homo sapiens OX=9606 GN=FBLN2 PE=1 SV=2	Color2 [DarkGray]	1	4		26.9411	26.6188	26.0556	26.9889	27.1114	22.4278
	1.29322	-2.08769	K.DVDEC[+57.021]ALGTHN[+1694.603]C[+57.021]SEAETC[+57.021]HNIQGSFR.C	HexNAc(3)Hex(4)Fuc(1)NeuAc(1)	C[+57]*3, N[+1695]	>sp|P98095|FBLN2_HUMAN Fibulin-2 OS=Homo sapiens OX=9606 GN=FBLN2 PE=1 SV=2	Color2 [DarkGray]	1	4		20.7332	23.2784	21.4859	23.9342	23.8235	24.0028
	1.19879	-5.40091	K.DVDEC[+57.021]ALGTHN[+1768.640]C[+57.021]SEAETC[+57.021]HNIQGSFR.C	HexNAc(4)Hex(5)Fuc(1)	C[+57]*3, N[+1769]	>sp|P98095|FBLN2_HUMAN Fibulin-2 OS=Homo sapiens OX=9606 GN=FBLN2 PE=1 SV=2	Color2 [DarkGray]	1	4		18.8485	24.9141	24.901	28.9536	27.0164	28.8962
	0.945035	-1.55206	K.DVDEC[+57.021]ALGTHN[+1897.682]C[+57.021]SEAETC[+57.021]HNIQGSFR.C	HexNAc(4)Hex(4)Fuc(1)NeuAc(1)	C[+57]*3, N[+1898]	>sp|P98095|FBLN2_HUMAN Fibulin-2 OS=Homo sapiens OX=9606 GN=FBLN2 PE=1 SV=2	Color2 [DarkGray]	1	4		23.14	24.5419	23.2254	25.6274	23.9639	25.9723
	1.81514	-1.3183	K.DVDEC[+57.021]ALGTHN[+2059.735]C[+57.021]SEAETC[+57.021]HNIQGSFR.C	HexNAc(4)Hex(5)Fuc(1)NeuAc(1)	C[+57]*3, N[+2060]	>sp|P98095|FBLN2_HUMAN Fibulin-2 OS=Homo sapiens OX=9606 GN=FBLN2 PE=1 SV=2	Color2 [DarkGray]	1	4		24.5219	24.2622	24.9587	26.2953	25.4288	25.9737
	0.878356	-4.47657	K.DVEC[+57.021]GEGHFC[+57.021]HDN[+1038.375]QTC[+57.021]C[+57.021]R.D	HexNAc(2)Hex(3)Fuc(1)	C[+57]*4, N[+1038]	>sp|P28799|GRN_HUMAN Progranulin OS=Homo sapiens OX=9606 GN=GRN PE=1 SV=2	Color2 [DarkGray]	1	4		20.9744	28.9041	25.9225	28.9967	30.778	29.456
+	5.1835	5.25014	K.DVEC[+57.021]GEGHFC[+57.021]HDN[+1694.603]QTC[+57.021]C[+57.021]R.D	HexNAc(3)Hex(4)Fuc(1)NeuAc(1)	C[+57]*4, N[+1695]	>sp|P28799|GRN_HUMAN Progranulin OS=Homo sapiens OX=9606 GN=GRN PE=1 SV=2	Color2 [DarkGray]	1	4		24.3107	24.776	24.5751	19.0979	19.4287	19.3847
	0.140701	0.512395	K.DVEC[+57.021]GEGHFC[+57.021]HDN[+1702.581]QTC[+57.021]C[+57.021]R.D	HexNAc(2)Hex(8)	C[+57]*4, N[+1703]	>sp|P28799|GRN_HUMAN Progranulin OS=Homo sapiens OX=9606 GN=GRN PE=1 SV=2	Color2 [DarkGray]	1	4		18.5975	20.2304	23.0488	20.7012	20.1727	19.4656
	0.878827	2.18119	K.DVEC[+57.021]GEGHFC[+57.021]HDN[+892.317]QTC[+57.021]C[+57.021]R.D	HexNAc(2)Hex(3)	C[+57]*4, N[+892]	>sp|P28799|GRN_HUMAN Progranulin OS=Homo sapiens OX=9606 GN=GRN PE=1 SV=2	Color2 [DarkGray]	1	4		19.842	19.9479	23.019	18.4459	18.0852	19.7343
	1.44955	1.92661	K.DVN[+1864.634]YTQIVVDR.T	HexNAc(2)Hex(9)	N[+1865]	>sp|Q92854|SEM4D_HUMAN Semaphorin-4D OS=Homo sapiens OX=9606 GN=SEMA4D PE=1 SV=1	Color2 [DarkGray]	1	4		20.457	22.342	22.1567	19.7619	19.9587	19.4553
	0.778358	1.35707	K.DVQIIVFPEDGIHGFN[+2204.772]FTR.T	HexNAc(4)Hex(5)NeuAc(2)	N[+2205]	>sp|P43251|BTD_HUMAN Biotinidase OS=Homo sapiens OX=9606 GN=BTD PE=1 SV=2	Color2 [DarkGray]	1	4		21.134	19.0774	21.6542	19.3735	18.9415	19.4795
	0.307022	0.795073	K.DVTIFSVGVYNAN[+1540.529]R.S	HexNAc(2)Hex(7)	N[+1541]	>sp|A8TX70|CO6A5_HUMAN Collagen alpha-5(VI) chain OS=Homo sapiens OX=9606 GN=COL6A5 PE=1 SV=1	Color2 [DarkGray]	1	4		18.3799	19.7407	21.1542	20.252	18.7326	17.905
	0.168144	0.248809	K.DYFTDLITN[+1864.634]ESINYFK.M	HexNAc(2)Hex(9)	N[+1865]	>sp|Q8IWU6|SULF1_HUMAN Extracellular sulfatase Sulf-1 OS=Homo sapiens OX=9606 GN=SULF1 PE=1 SV=1	Color2 [DarkGray]	1	4		18.6751	18.7906	20.1425	18.355	19.2828	19.2239
+	2.71878	4.13603	K.DYGSQEDFTQVWN[+1378.476]TTMK.G	HexNAc(2)Hex(6)	N[+1378]	>sp|O60635|TSN1_HUMAN Tetraspanin-1 OS=Homo sapiens OX=9606 GN=TSPAN1 PE=1 SV=2	Color2 [DarkGray]	1	4		24.3349	23.7072	25.6319	20.5377	20.3636	20.3647
+	3.16259	3.57822	K.DYGSQEDFTQVWN[+1540.529]TTMK.G	HexNAc(2)Hex(7)	N[+1541]	>sp|O60635|TSN1_HUMAN Tetraspanin-1 OS=Homo sapiens OX=9606 GN=TSPAN1 PE=1 SV=2	Color2 [DarkGray]	1	4		22.718	23.3066	23.1005	20.075	19.3957	18.9196
	1.35845	1.63223	K.DYGSQEDFTQVWN[+1710.598]TTMK.G	HexNAc(3)Hex(5)NeuAc(1)	N[+1711]	>sp|O60635|TSN1_HUMAN Tetraspanin-1 OS=Homo sapiens OX=9606 GN=TSPAN1 PE=1 SV=2	Color2 [DarkGray]	1	4		20.7475	20.9711	20.9445	19.8867	18.1448	19.7348
	0.0749464	0.113623	K.DYGSQEDFTQVWN[+1864.634]TTMK.G	HexNAc(2)Hex(9)	N[+1865]	>sp|O60635|TSN1_HUMAN Tetraspanin-1 OS=Homo sapiens OX=9606 GN=TSPAN1 PE=1 SV=2	Color2 [DarkGray]	1	4		19.9373	19.757	18.7181	20.016	18.7238	19.3317
+	2.71823	5.53804	K.DYGSQEDFTQVWN[+1872.651]TTMK.G	HexNAc(3)Hex(6)NeuAc(1)	N[+1873]	>sp|O60635|TSN1_HUMAN Tetraspanin-1 OS=Homo sapiens OX=9606 GN=TSPAN1 PE=1 SV=2	Color2 [DarkGray]	1	4		24.7131	25.2765	24.7419	20.5581	18.0105	19.5489
	0.570727	1.80995	K.DYYPIN[+1702.581]ESLASLPLR.V	HexNAc(2)Hex(8)	N[+1703]	>sp|O96005|CLPT1_HUMAN Cleft lip and palate transmembrane protein 1 OS=Homo sapiens OX=9606 GN=CLPTM1 PE=1 SV=1	Color2 [DarkGray]	1	4		22.51	22.1319	18.6475	18.4197	18.7869	20.653
	0.110778	0.086291	K.DYYPIN[+1864.634]ESLASLPLR.V	HexNAc(2)Hex(9)	N[+1865]	>sp|O96005|CLPT1_HUMAN Cleft lip and palate transmembrane protein 1 OS=Homo sapiens OX=9606 GN=CLPTM1 PE=1 SV=1	Color2 [DarkGray]	1	4		19.7078	20.2959	20.1594	19.984	19.5812	20.3391
	0.179861	-0.839919	K.EADDFFTSLGLLPVPPEFWN[+2424.867]K.S	HexNAc(5)Hex(6)Fuc(1)NeuAc(1)	N[+2425]	>sp|P12821|ACE_HUMAN Angiotensin-converting enzyme OS=Homo sapiens OX=9606 GN=ACE PE=1 SV=1	Color2 [DarkGray]	1	4		18.9495	19.2971	18.4782	18.6416	23.1954	17.4076
	0.586852	-1.27327	K.EAGN[+1622.582]ITTDGYEILGK.L	HexNAc(4)Hex(5)	N[+1623]	>sp|Q99715|COCA1_HUMAN Collagen alpha-1(XII) chain OS=Homo sapiens OX=9606 GN=COL12A1 PE=1 SV=2	Color2 [DarkGray]	1	4		19.5654	20.2438	18.9717	22.319	21.0503	19.2314
	1.03337	-3.49371	K.EAGN[+1768.640]ITTDGYEILGK.L	HexNAc(4)Hex(5)Fuc(1)	N[+1769]	>sp|Q99715|COCA1_HUMAN Collagen alpha-1(XII) chain OS=Homo sapiens OX=9606 GN=COL12A1 PE=1 SV=2	Color2 [DarkGray]	1	4		18.3116	18.6845	19.6013	23.9176	23.8829	19.278
	0.338776	-1.05289	K.EAGN[+1784.634]ITTDGYEILGK.L	HexNAc(4)Hex(6)	N[+1785]	>sp|Q99715|COCA1_HUMAN Collagen alpha-1(XII) chain OS=Homo sapiens OX=9606 GN=COL12A1 PE=1 SV=2	Color2 [DarkGray]	1	4		18.0382	20.3369	20.7329	22.5928	20.3846	19.2893
	0.289709	-0.534591	K.EAGN[+1825.661]ITTDGYEILGK.L	HexNAc(5)Hex(5)	N[+1826]	>sp|Q99715|COCA1_HUMAN Collagen alpha-1(XII) chain OS=Homo sapiens OX=9606 GN=COL12A1 PE=1 SV=2	Color2 [DarkGray]	1	4		19.4978	19.5261	18.4427	20.8262	19.688	18.5563
	0.239404	-0.403297	K.EAGN[+1897.682]ITTDGYEILGK.L	HexNAc(4)Hex(4)Fuc(1)NeuAc(1)	N[+1898]	>sp|Q99715|COCA1_HUMAN Collagen alpha-1(XII) chain OS=Homo sapiens OX=9606 GN=COL12A1 PE=1 SV=2	Color2 [DarkGray]	1	4		19.349	18.9282	19.4884	19.6989	20.7497	18.5269
	0.877193	-1.29019	K.EAGN[+1930.692]ITTDGYEILGK.L	HexNAc(4)Hex(6)Fuc(1)	N[+1931]	>sp|Q99715|COCA1_HUMAN Collagen alpha-1(XII) chain OS=Homo sapiens OX=9606 GN=COL12A1 PE=1 SV=2	Color2 [DarkGray]	1	4		18.6673	19.5858	18.8434	21.4162	20.297	19.2538
	0.0155244	-0.0451228	K.EAGN[+1954.704]ITTDGYEILGK.L	HexNAc(5)Hex(4)NeuAc(1)	N[+1955]	>sp|Q99715|COCA1_HUMAN Collagen alpha-1(XII) chain OS=Homo sapiens OX=9606 GN=COL12A1 PE=1 SV=2	Color2 [DarkGray]	1	4		18.6142	20.4881	20.0562	21.3192	19.0796	18.8951
	0.00381497	0.0133438	K.EAGN[+1971.719]ITTDGYEILGK.L	HexNAc(5)Hex(5)Fuc(1)	N[+1972]	>sp|Q99715|COCA1_HUMAN Collagen alpha-1(XII) chain OS=Homo sapiens OX=9606 GN=COL12A1 PE=1 SV=2	Color2 [DarkGray]	1	4		19.7293	18.3006	20.758	21.2072	19.4228	18.1179
+	2.87866	-6.17217	K.EAGN[+2059.735]ITTDGYEILGK.L	HexNAc(4)Hex(5)Fuc(1)NeuAc(1)	N[+2060]	>sp|Q99715|COCA1_HUMAN Collagen alpha-1(XII) chain OS=Homo sapiens OX=9606 GN=COL12A1 PE=1 SV=2	Color2 [DarkGray]	1	4		19.9653	17.9597	18.0708	25.4924	24.0714	24.9484
	1.56689	-1.28668	K.EAGN[+2075.730]ITTDGYEILGK.L	HexNAc(4)Hex(6)NeuAc(1)	N[+2076]	>sp|Q99715|COCA1_HUMAN Collagen alpha-1(XII) chain OS=Homo sapiens OX=9606 GN=COL12A1 PE=1 SV=2	Color2 [DarkGray]	1	4		18.9396	20.208	19.8472	20.9636	20.9186	20.9727
	1.77308	-3.89381	K.EAGN[+2116.756]ITTDGYEILGK.L	HexNAc(5)Hex(5)NeuAc(1)	N[+2117]	>sp|Q99715|COCA1_HUMAN Collagen alpha-1(XII) chain OS=Homo sapiens OX=9606 GN=COL12A1 PE=1 SV=2	Color2 [DarkGray]	1	4		17.6352	20.4061	18.1238	23.4439	21.7347	22.6679
	1.08524	-1.85406	K.EAGN[+2221.788]ITTDGYEILGK.L	HexNAc(4)Hex(6)Fuc(1)NeuAc(1)	N[+2222]	>sp|Q99715|COCA1_HUMAN Collagen alpha-1(XII) chain OS=Homo sapiens OX=9606 GN=COL12A1 PE=1 SV=2	Color2 [DarkGray]	1	4		18.3195	18.3352	20.4735	20.1666	21.2556	21.2682
	0.77932	-2.85227	K.EAGN[+2262.814]ITTDGYEILGK.L	HexNAc(5)Hex(5)Fuc(1)NeuAc(1)	N[+2263]	>sp|Q99715|COCA1_HUMAN Collagen alpha-1(XII) chain OS=Homo sapiens OX=9606 GN=COL12A1 PE=1 SV=2	Color2 [DarkGray]	1	4		19.6797	18.8467	19.5553	24.6639	19.0293	22.9453
	1.99663	3.67576	K.EASQN[+1378.476]ITYIC[+57.021]K.N	HexNAc(2)Hex(6)	C[+57], N[+1378]	>sp|P05997|CO5A2_HUMAN Collagen alpha-2(V) chain OS=Homo sapiens OX=9606 GN=COL5A2 PE=1 SV=3	Color2 [DarkGray]	1	4		22.8067	22.0111	23.9128	19.0006	18.3677	20.3351
	0.144619	-0.36992	K.EASQN[+1864.634]ITYIC[+57.021]K.N	HexNAc(2)Hex(9)	C[+57], N[+1865]	>sp|P05997|CO5A2_HUMAN Collagen alpha-2(V) chain OS=Homo sapiens OX=9606 GN=COL5A2 PE=1 SV=3	Color2 [DarkGray]	1	4		18.9535	21.2599	18.4477	20.0694	20.5163	19.1852
	0.397513	1.23177	K.EDAAVN[+1913.677]C[+57.021]TDISVQK.T	HexNAc(4)Hex(5)NeuAc(1)	C[+57], N[+1914]	>sp|Q86VB7|C163A_HUMAN Scavenger receptor cysteine-rich type 1 protein M130 OS=Homo sapiens OX=9606 GN=CD163 PE=1 SV=2	Color2 [DarkGray]	1	4		22.1556	17.8918	20.2354	18.1957	18.6891	19.7027
	0.481184	-1.23164	K.EGKPFYQMTSN[+2059.735]ATQAFWTK.Q	HexNAc(4)Hex(5)Fuc(1)NeuAc(1)	N[+2060]	>sp|P16284|PECA1_HUMAN Platelet endothelial cell adhesion molecule OS=Homo sapiens OX=9606 GN=PECAM1 PE=1 SV=2	Color2 [DarkGray]	1	4		19.9093	19.7406	19.7948	23.1461	19.3665	20.627
	1.97988	-3.37674	K.EGYSN[+2204.772]ISYIVVNHQGISSR.L	HexNAc(4)Hex(5)NeuAc(2)	N[+2205]	>sp|P49908|SEPP1_HUMAN Selenoprotein P OS=Homo sapiens OX=9606 GN=SELENOP PE=1 SV=3	Color2 [DarkGray]	1	4		20.1635	19.7528	20.5595	24.0421	22.1408	24.4231
	0.534672	-2.42131	K.EGYSN[+3284.174]ISYIVVNHQGISSR.L	HexNAc(7)Hex(7)Fuc(1)NeuAc(2)	N[+3284]	>sp|P49908|SEPP1_HUMAN Selenoprotein P OS=Homo sapiens OX=9606 GN=SELENOP PE=1 SV=3	Color2 [DarkGray]	1	4		19.415	18.6655	19.0046	18.9558	20.022	25.3713
	0.10513	-0.390975	K.EHEAQSN[+2204.772]ASLDVFLGHTNVEELMK.L	HexNAc(4)Hex(5)NeuAc(2)	N[+2205]	>sp|P00736|C1R_HUMAN Complement C1r subcomponent OS=Homo sapiens OX=9606 GN=C1R PE=1 SV=2	Color2 [DarkGray]	1	4		18.1612	19.8295	21.6382	22.0157	19.1252	19.6609
	0.448934	0.914061	K.EHEAQSN[+2350.830]ASLDVFLGHTNVEELMK.L	HexNAc(4)Hex(5)Fuc(1)NeuAc(2)	N[+2351]	>sp|P00736|C1R_HUMAN Complement C1r subcomponent OS=Homo sapiens OX=9606 GN=C1R PE=1 SV=2	Color2 [DarkGray]	1	4		18.6496	21.2419	21.1716	19.8309	19.1603	19.3298
+	2.83124	3.59059	K.EHEGAIYPDN[+1378.476]TTDFQR.A	HexNAc(2)Hex(6)	N[+1378]	>sp|P00450|CERU_HUMAN Ceruloplasmin OS=Homo sapiens OX=9606 GN=CP PE=1 SV=1	Color2 [DarkGray]	1	4		23.2175	22.2264	23.2603	19.785	18.7147	19.4326
	1.99176	2.52055	K.EHEGAIYPDN[+1540.529]TTDFQR.A	HexNAc(2)Hex(7)	N[+1541]	>sp|P00450|CERU_HUMAN Ceruloplasmin OS=Homo sapiens OX=9606 GN=CP PE=1 SV=1	Color2 [DarkGray]	1	4		22.4872	21.6334	22.7624	20.573	19.0853	19.663
+	2.0459	2.70019	K.EHEGAIYPDN[+1702.581]TTDFQR.A	HexNAc(2)Hex(8)	N[+1703]	>sp|P00450|CERU_HUMAN Ceruloplasmin OS=Homo sapiens OX=9606 GN=CP PE=1 SV=1	Color2 [DarkGray]	1	4		22.876	21.2622	22.7272	19.1045	19.8359	19.8245
	0.355256	0.77935	K.EHEGAIYPDN[+1913.677]TTDFQR.A	HexNAc(4)Hex(5)NeuAc(1)	N[+1914]	>sp|P00450|CERU_HUMAN Ceruloplasmin OS=Homo sapiens OX=9606 GN=CP PE=1 SV=1	Color2 [DarkGray]	1	4		24.2461	23.3935	23.47	24.5356	22.691	21.5448
	0.895708	2.26911	K.EHEGAIYPDN[+2059.735]TTDFQR.A	HexNAc(4)Hex(5)Fuc(1)NeuAc(1)	N[+2060]	>sp|P00450|CERU_HUMAN Ceruloplasmin OS=Homo sapiens OX=9606 GN=CP PE=1 SV=1	Color2 [DarkGray]	1	4		20.3964	23.9112	22.0767	19.6146	21.0064	18.9559
	0.827607	0.828865	K.EHEGAIYPDN[+2100.761]TTDFQR.A	HexNAc(5)Hex(4)Fuc(1)NeuAc(1)	N[+2101]	>sp|P00450|CERU_HUMAN Ceruloplasmin OS=Homo sapiens OX=9606 GN=CP PE=1 SV=1	Color2 [DarkGray]	1	4		19.4316	20.6974	20.8603	19.46	19.7046	19.3381
+	2.25571	3.73926	K.EHEGAIYPDN[+2141.788]TTDFQR.A	HexNAc(6)Hex(3)Fuc(1)NeuAc(1)	N[+2142]	>sp|P00450|CERU_HUMAN Ceruloplasmin OS=Homo sapiens OX=9606 GN=CP PE=1 SV=1	Color2 [DarkGray]	1	4		23.7385	23.8112	21.9324	20.0147	18.9779	19.2717
	3.23458	1.25352	K.EHEGAIYPDN[+2204.772]TTDFQR.A	HexNAc(4)Hex(5)NeuAc(2)	N[+2205]	>sp|P00450|CERU_HUMAN Ceruloplasmin OS=Homo sapiens OX=9606 GN=CP PE=1 SV=1	Color2 [DarkGray]	1	4		27.0007	27.2647	27.1286	26.063	25.7154	25.8551
	1.46477	3.99194	K.EHEGAIYPDN[+2350.830]TTDFQR.A	HexNAc(4)Hex(5)Fuc(1)NeuAc(2)	N[+2351]	>sp|P00450|CERU_HUMAN Ceruloplasmin OS=Homo sapiens OX=9606 GN=CP PE=1 SV=1	Color2 [DarkGray]	1	4		25.1887	28.8671	26.3231	22.9808	23.8181	21.6042
+	2.62442	4.6953	K.EHEGAIYPDN[+2391.857]TTDFQR.A	HexNAc(5)Hex(4)Fuc(1)NeuAc(2)	N[+2392]	>sp|P00450|CERU_HUMAN Ceruloplasmin OS=Homo sapiens OX=9606 GN=CP PE=1 SV=1	Color2 [DarkGray]	1	4		23.9492	24.294	23.6189	20.5613	18.7567	18.4583
	1.22896	1.09336	K.EHEGAIYPDN[+2432.884]TTDFQR.A	HexNAc(6)Hex(3)Fuc(1)NeuAc(2)	N[+2433]	>sp|P00450|CERU_HUMAN Ceruloplasmin OS=Homo sapiens OX=9606 GN=CP PE=1 SV=1	Color2 [DarkGray]	1	4		20.3524	20.7638	20.7747	18.8919	19.467	20.2518
	1.29839	2.06036	K.EHEGAIYPDN[+2553.910]TTDFQR.A	HexNAc(5)Hex(5)Fuc(1)NeuAc(2)	N[+2554]	>sp|P00450|CERU_HUMAN Ceruloplasmin OS=Homo sapiens OX=9606 GN=CP PE=1 SV=1	Color2 [DarkGray]	1	4		21.6446	19.713	22.1252	19.248	19.14	18.9137
	1.06346	1.77288	K.EHEGAIYPDN[+2861.000]TTDFQR.A	HexNAc(5)Hex(6)NeuAc(3)	N[+2861]	>sp|P00450|CERU_HUMAN Ceruloplasmin OS=Homo sapiens OX=9606 GN=CP PE=1 SV=1	Color2 [DarkGray]	1	4		21.8475	22.0429	22.0804	19.0929	19.8429	21.7164
+	2.21456	3.77751	K.EHEGAIYPDN[+3007.058]TTDFQR.A	HexNAc(5)Hex(6)Fuc(1)NeuAc(3)	N[+3007]	>sp|P00450|CERU_HUMAN Ceruloplasmin OS=Homo sapiens OX=9606 GN=CP PE=1 SV=1	Color2 [DarkGray]	1	4		23.0785	23.2102	23.3147	18.0475	20.4147	19.8086
+	2.31216	-4.68037	K.EHYLSSVN[+1216.423]K.T	HexNAc(2)Hex(5)	N[+1216]	>sp|O75051|PLXA2_HUMAN Plexin-A2 OS=Homo sapiens OX=9606 GN=PLXNA2 PE=1 SV=4	Color2 [DarkGray]	1	4		18.5276	20.0787	19.3105	25.0748	22.6818	24.2015
+	5.23967	-5.80569	K.EHYLSSVN[+1378.476]K.T	HexNAc(2)Hex(6)	N[+1378]	>sp|O75051|PLXA2_HUMAN Plexin-A2 OS=Homo sapiens OX=9606 GN=PLXNA2 PE=1 SV=4	Color2 [DarkGray]	1	4		18.4059	18.2009	18.4586	24.4234	23.8588	24.2002
	0.415318	-1.34013	K.EIAN[+1913.677]ATAKPEDR.N	HexNAc(4)Hex(5)NeuAc(1)	N[+1914]	>sp|P08473|NEP_HUMAN Neprilysin OS=Homo sapiens OX=9606 GN=MME PE=1 SV=2	Color2 [DarkGray]	1	4		20.0099	19.5644	19.6441	19.0791	20.4681	23.6916
	1.82429	-5.3587	K.EIAN[+2059.735]ATAKPEDR.N	HexNAc(4)Hex(5)Fuc(1)NeuAc(1)	N[+2060]	>sp|P08473|NEP_HUMAN Neprilysin OS=Homo sapiens OX=9606 GN=MME PE=1 SV=2	Color2 [DarkGray]	1	4		20.0324	19.4638	20.2495	25.4219	22.9703	27.4295
	0.121487	-0.413643	K.EIAN[+2350.830]ATAKPEDR.N	HexNAc(4)Hex(5)Fuc(1)NeuAc(2)	N[+2351]	>sp|P08473|NEP_HUMAN Neprilysin OS=Homo sapiens OX=9606 GN=MME PE=1 SV=2	Color2 [DarkGray]	1	4		20.5015	21.0381	19.7031	23.1803	19.4719	19.8314
	0.965025	-1.22097	K.ELEGMAGNKN[+1216.423]NTIYVDNFDK.L	HexNAc(2)Hex(5)	N[+1216]	>sp|A8TX70|CO6A5_HUMAN Collagen alpha-5(VI) chain OS=Homo sapiens OX=9606 GN=COL6A5 PE=1 SV=1	Color2 [DarkGray]	1	4		18.8146	20.3315	18.9791	21.1694	20.6468	19.9718
	1.33742	-3.68753	K.ELEGMAGNKN[+1378.476]NTIYVDNFDK.L	HexNAc(2)Hex(6)	N[+1378]	>sp|A8TX70|CO6A5_HUMAN Collagen alpha-5(VI) chain OS=Homo sapiens OX=9606 GN=COL6A5 PE=1 SV=1	Color2 [DarkGray]	1	4		18.5791	19.94	18.7813	24.3439	23.6329	20.3862
+	2.42921	-5.77732	K.ELEGMAGNKN[+1540.529]NTIYVDNFDK.L	HexNAc(2)Hex(7)	N[+1541]	>sp|A8TX70|CO6A5_HUMAN Collagen alpha-5(VI) chain OS=Homo sapiens OX=9606 GN=COL6A5 PE=1 SV=1	Color2 [DarkGray]	1	4		17.9943	19.6155	21.0839	25.833	25.4822	24.7104
	0.84441	-4.15726	K.ELEGMAGNKN[+1702.581]NTIYVDNFDK.L	HexNAc(2)Hex(8)	N[+1703]	>sp|A8TX70|CO6A5_HUMAN Collagen alpha-5(VI) chain OS=Homo sapiens OX=9606 GN=COL6A5 PE=1 SV=1	Color2 [DarkGray]	1	4		18.691	19.7829	19.1744	26.2676	24.9416	18.9109
+	3.09783	-3.69891	K.ELEGMAGNKN[+1864.634]NTIYVDNFDK.L	HexNAc(2)Hex(9)	N[+1865]	>sp|A8TX70|CO6A5_HUMAN Collagen alpha-5(VI) chain OS=Homo sapiens OX=9606 GN=COL6A5 PE=1 SV=1	Color2 [DarkGray]	1	4		19.7069	19.0982	19.8544	22.9135	23.917	22.9258
	1.02611	-2.34498	K.ELEGMAGNKN[+1864.634]NTIYVDNFDKLK.D	HexNAc(2)Hex(9)	N[+1865]	>sp|A8TX70|CO6A5_HUMAN Collagen alpha-5(VI) chain OS=Homo sapiens OX=9606 GN=COL6A5 PE=1 SV=1	Color2 [DarkGray]	1	4		19.6223	18.502	19.31	22.2973	22.7078	19.4641
	0.478727	-1.36984	K.ELEGMAGNKN[+1866.688]NTIYVDNFDKLK.D	HexNAc(6)Hex(4)	N[+1867]	>sp|A8TX70|CO6A5_HUMAN Collagen alpha-5(VI) chain OS=Homo sapiens OX=9606 GN=COL6A5 PE=1 SV=1	Color2 [DarkGray]	1	4		19.3738	19.5177	18.0317	18.2771	20.5093	22.2464
	0.733506	1.46138	K.ELHHLQEQN[+1378.476]VSNAFLDK.G	HexNAc(2)Hex(6)	N[+1378]	>sp|P00450|CERU_HUMAN Ceruloplasmin OS=Homo sapiens OX=9606 GN=CP PE=1 SV=1	Color2 [DarkGray]	1	4		18.9616	21.518	21.6539	18.8527	19.7349	19.1617
	0.432007	1.46496	K.ELHHLQEQN[+1378.476]VSNAFLDKGEFYIGSK.Y	HexNAc(2)Hex(6)	N[+1378]	>sp|P00450|CERU_HUMAN Ceruloplasmin OS=Homo sapiens OX=9606 GN=CP PE=1 SV=1	Color2 [DarkGray]	1	4		22.1293	18.697	23.0399	20.9861	19.4848	19.0004
	0.721816	-1.60753	K.ELHHLQEQN[+1913.677]VSNAFLDK.G	HexNAc(4)Hex(5)NeuAc(1)	N[+1914]	>sp|P00450|CERU_HUMAN Ceruloplasmin OS=Homo sapiens OX=9606 GN=CP PE=1 SV=1	Color2 [DarkGray]	1	4		18.607	19.4476	19.0409	22.5511	20.1269	19.2402
	0.420035	1.07642	K.ELHHLQEQN[+1913.677]VSNAFLDKGEFYIGSK.Y	HexNAc(4)Hex(5)NeuAc(1)	N[+1914]	>sp|P00450|CERU_HUMAN Ceruloplasmin OS=Homo sapiens OX=9606 GN=CP PE=1 SV=1	Color2 [DarkGray]	1	4		22.9082	21.1035	23.0154	22.8236	21.2651	19.7092
+	2.78003	3.26781	K.ELHHLQEQN[+2059.735]VSNAFLDKGEFYIGSK.Y	HexNAc(4)Hex(5)Fuc(1)NeuAc(1)	N[+2060]	>sp|P00450|CERU_HUMAN Ceruloplasmin OS=Homo sapiens OX=9606 GN=CP PE=1 SV=1	Color2 [DarkGray]	1	4		22.7246	23.683	23.0781	19.4375	20.5379	19.7068
	0.136574	0.355085	K.ELHHLQEQN[+2100.761]VSNAFLDKGEFYIGSK.Y	HexNAc(5)Hex(4)Fuc(1)NeuAc(1)	N[+2101]	>sp|P00450|CERU_HUMAN Ceruloplasmin OS=Homo sapiens OX=9606 GN=CP PE=1 SV=1	Color2 [DarkGray]	1	4		22.1977	19.1742	19.827	20.5816	19.6492	19.9029
+	3.60999	4.61825	K.ELHHLQEQN[+2141.788]VSNAFLDKGEFYIGSK.Y	HexNAc(6)Hex(3)Fuc(1)NeuAc(1)	N[+2142]	>sp|P00450|CERU_HUMAN Ceruloplasmin OS=Homo sapiens OX=9606 GN=CP PE=1 SV=1	Color2 [DarkGray]	1	4		24.4127	23.902	25.0524	19.9539	20.0544	19.504
	1.38019	6.32668	K.ELHHLQEQN[+2204.772]VSNAFLDK.G	HexNAc(4)Hex(5)NeuAc(2)	N[+2205]	>sp|P00450|CERU_HUMAN Ceruloplasmin OS=Homo sapiens OX=9606 GN=CP PE=1 SV=1	Color2 [DarkGray]	1	4		26.4624	27.9329	26.5821	18.3124	24.8274	18.8574
	1.39525	0.840371	K.ELHHLQEQN[+2204.772]VSNAFLDKGEFYIGSK.Y	HexNAc(4)Hex(5)NeuAc(2)	N[+2205]	>sp|P00450|CERU_HUMAN Ceruloplasmin OS=Homo sapiens OX=9606 GN=CP PE=1 SV=1	Color2 [DarkGray]	1	4		27.2908	26.3652	26.7412	25.8112	26.0925	25.9724
	1.77766	4.89598	K.ELHHLQEQN[+2350.830]VSNAFLDK.G	HexNAc(4)Hex(5)Fuc(1)NeuAc(2)	N[+2351]	>sp|P00450|CERU_HUMAN Ceruloplasmin OS=Homo sapiens OX=9606 GN=CP PE=1 SV=1	Color2 [DarkGray]	1	4		23.1005	25.9637	25.6617	20.6587	18.3483	21.031
	0.15507	0.52285	K.ELHHLQEQN[+2350.830]VSNAFLDKGEFYIGSK.Y	HexNAc(4)Hex(5)Fuc(1)NeuAc(2)	N[+2351]	>sp|P00450|CERU_HUMAN Ceruloplasmin OS=Homo sapiens OX=9606 GN=CP PE=1 SV=1	Color2 [DarkGray]	1	4		23.4466	24.2113	22.5898	23.8302	24.2833	20.5656
	0.791969	3.44519	K.ELHHLQEQN[+2391.857]VSNAFLDK.G	HexNAc(5)Hex(4)Fuc(1)NeuAc(2)	N[+2392]	>sp|P00450|CERU_HUMAN Ceruloplasmin OS=Homo sapiens OX=9606 GN=CP PE=1 SV=1	Color2 [DarkGray]	1	4		24.2583	19.0474	25.2863	18.5056	19.3382	20.4127
+	2.43355	5.90132	K.ELHHLQEQN[+2391.857]VSNAFLDKGEFYIGSK.Y	HexNAc(5)Hex(4)Fuc(1)NeuAc(2)	N[+2392]	>sp|P00450|CERU_HUMAN Ceruloplasmin OS=Homo sapiens OX=9606 GN=CP PE=1 SV=1	Color2 [DarkGray]	1	4		23.1206	26.1759	25.8015	19.2924	18.8949	19.2067
	0.00255558	0.00911903	K.ELHHLQEQN[+2569.905]VSNAFLDKGEFYIGSK.Y	HexNAc(5)Hex(6)NeuAc(2)	N[+2570]	>sp|P00450|CERU_HUMAN Ceruloplasmin OS=Homo sapiens OX=9606 GN=CP PE=1 SV=1	Color2 [DarkGray]	1	4		18.4978	19.171	21.1735	20.5647	20.3286	17.9216
	0.0461508	0.37387	K.ELHHLQEQN[+2861.000]VSNAFLDKGEFYIGSK.Y	HexNAc(5)Hex(6)NeuAc(3)	N[+2861]	>sp|P00450|CERU_HUMAN Ceruloplasmin OS=Homo sapiens OX=9606 GN=CP PE=1 SV=1	Color2 [DarkGray]	1	4		18.4374	25.3394	19.3473	18.4891	24.0831	19.4302
	0.731764	-1.90567	K.ELHHLQEQN[+3007.058]VSNAFLDKGEFYIGSK.Y	HexNAc(5)Hex(6)Fuc(1)NeuAc(3)	N[+3007]	>sp|P00450|CERU_HUMAN Ceruloplasmin OS=Homo sapiens OX=9606 GN=CP PE=1 SV=1	Color2 [DarkGray]	1	4		19.2987	20.5356	17.9398	19.4431	22.6277	21.4203
	0.0769228	0.323067	K.ELPGVC[+57.021]N[+1913.677]ETMMALWEEC[+57.021]KPC[+57.021]LK.Q	HexNAc(4)Hex(5)NeuAc(1)	C[+57]*3, N[+1914]	>sp|P10909|CLUS_HUMAN Clusterin OS=Homo sapiens OX=9606 GN=CLU PE=1 SV=1	Color2 [DarkGray]	1	4		19.0825	22.4528	20.5315	22.4647	18.6907	19.9422
	1.0845	-3.50175	K.ELPGVC[+57.021]N[+2204.772]ETMMALWEEC[+57.021]KPC[+57.021]LK.Q	HexNAc(4)Hex(5)NeuAc(2)	C[+57]*3, N[+2205]	>sp|P10909|CLUS_HUMAN Clusterin OS=Homo sapiens OX=9606 GN=CLU PE=1 SV=1	Color2 [DarkGray]	1	4		24.2537	25.1613	20.2402	26.8742	26.4511	26.8351
	0.221106	-0.647996	K.ELPGVC[+57.021]N[+2350.830]ETMMALWEEC[+57.021]KPC[+57.021]LK.Q	HexNAc(4)Hex(5)Fuc(1)NeuAc(2)	C[+57]*3, N[+2351]	>sp|P10909|CLUS_HUMAN Clusterin OS=Homo sapiens OX=9606 GN=CLU PE=1 SV=1	Color2 [DarkGray]	1	4		19.3582	19.1634	20.1929	18.3422	22.1462	20.1701
	0.381232	-1.22558	K.ELPGVC[+57.021]N[+2569.905]ETMMALWEEC[+57.021]KPC[+57.021]LK.Q	HexNAc(5)Hex(6)NeuAc(2)	C[+57]*3, N[+2570]	>sp|P10909|CLUS_HUMAN Clusterin OS=Homo sapiens OX=9606 GN=CLU PE=1 SV=1	Color2 [DarkGray]	1	4		20.3689	22.0934	18.8366	19.72	22.6895	22.5662
	0.153633	-0.297535	K.ELPGVC[+57.021]N[+2715.963]ETMMALWEEC[+57.021]KPC[+57.021]LK.Q	HexNAc(5)Hex(6)Fuc(1)NeuAc(2)	C[+57]*3, N[+2716]	>sp|P10909|CLUS_HUMAN Clusterin OS=Homo sapiens OX=9606 GN=CLU PE=1 SV=1	Color2 [DarkGray]	1	4		20.4475	20.4433	20.0787	21.338	19.1941	21.33
	0.92675	3.13252	K.ELPGVC[+57.021]N[+2861.000]ETMMALWEEC[+57.021]KPC[+57.021]LK.Q	HexNAc(5)Hex(6)NeuAc(3)	C[+57]*3, N[+2861]	>sp|P10909|CLUS_HUMAN Clusterin OS=Homo sapiens OX=9606 GN=CLU PE=1 SV=1	Color2 [DarkGray]	1	4		21.7878	25.5139	22.4721	19.188	22.2946	18.8935
	0.721679	-0.864717	K.ELYEPIWQN[+2059.735]FTDPQLR.R	HexNAc(4)Hex(5)Fuc(1)NeuAc(1)	N[+2060]	>sp|P12821|ACE_HUMAN Angiotensin-converting enzyme OS=Homo sapiens OX=9606 GN=ACE PE=1 SV=1	Color2 [DarkGray]	1	4		19.9542	19.6202	20.2552	21.8403	20.3265	20.2569
	1.83522	-3.09297	K.ELYEPIWQN[+2424.867]FTDPQLR.R	HexNAc(5)Hex(6)Fuc(1)NeuAc(1)	N[+2425]	>sp|P12821|ACE_HUMAN Angiotensin-converting enzyme OS=Homo sapiens OX=9606 GN=ACE PE=1 SV=1	Color2 [DarkGray]	1	4		18.3978	18.9666	18.7108	20.3278	22.3799	22.6465
+	2.66593	-2.01044	K.ELYEPIWQN[+2789.999]FTDPQLR.R	HexNAc(6)Hex(7)Fuc(1)NeuAc(1)	N[+2790]	>sp|P12821|ACE_HUMAN Angiotensin-converting enzyme OS=Homo sapiens OX=9606 GN=ACE PE=1 SV=1	Color2 [DarkGray]	1	4		19.9685	19.2207	19.9887	21.8405	21.4706	21.8982
+	3.16251	4.43894	K.EN[+1216.423]GTDTVQEEEESPAEGSK.D	HexNAc(2)Hex(5)	N[+1216]	>sp|Q9Y4L1|HYOU1_HUMAN Hypoxia up-regulated protein 1 OS=Homo sapiens OX=9606 GN=HYOU1 PE=1 SV=1	Color2 [DarkGray]	1	4		24.4059	23.8845	24.6899	20.6262	19.2349	19.8024
	1.21495	2.03308	K.EN[+1216.423]GTDTVQEEEESPAEGSKDEPGEQVELK.E	HexNAc(2)Hex(5)	N[+1216]	>sp|Q9Y4L1|HYOU1_HUMAN Hypoxia up-regulated protein 1 OS=Homo sapiens OX=9606 GN=HYOU1 PE=1 SV=1	Color2 [DarkGray]	1	4		22.1968	19.9508	22.3631	19.2952	19.6864	19.4299
	0.0689492	0.223923	K.EN[+1216.423]GTDTVQEEEESPAEGSKDEPGEQVELKEEAEAPVEDGSQPPPPEPK.G	HexNAc(2)Hex(5)	N[+1216]	>sp|Q9Y4L1|HYOU1_HUMAN Hypoxia up-regulated protein 1 OS=Homo sapiens OX=9606 GN=HYOU1 PE=1 SV=1	Color2 [DarkGray]	1	4		18.6207	19.3647	22.1736	20.5064	19.5818	19.3991
+	2.5097	3.59417	K.EN[+1378.476]GTDTVQEEEESPAEGSK.D	HexNAc(2)Hex(6)	N[+1378]	>sp|Q9Y4L1|HYOU1_HUMAN Hypoxia up-regulated protein 1 OS=Homo sapiens OX=9606 GN=HYOU1 PE=1 SV=1	Color2 [DarkGray]	1	4		24.3235	23.7666	24.628	21.586	19.8637	20.4859
	1.07611	0.972746	K.EN[+1378.476]GTDTVQEEEESPAEGSKDEPGEQVELK.E	HexNAc(2)Hex(6)	N[+1378]	>sp|Q9Y4L1|HYOU1_HUMAN Hypoxia up-regulated protein 1 OS=Homo sapiens OX=9606 GN=HYOU1 PE=1 SV=1	Color2 [DarkGray]	1	4		20.0746	21.0055	19.6557	19.2468	19.0327	19.5382
	0.769943	1.17804	K.EN[+1378.476]LTAPGSDSAVFFEQGTTR.I	HexNAc(2)Hex(6)	N[+1378]	>sp|P00450|CERU_HUMAN Ceruloplasmin OS=Homo sapiens OX=9606 GN=CP PE=1 SV=1	Color2 [DarkGray]	1	4		20.9485	19.63	21.2302	20.1716	19.6357	18.4673
	1.84621	1.76631	K.EN[+1540.529]GTLVQVATISGNMFNQMAK.W	HexNAc(2)Hex(7)	N[+1541]	>sp|O75503|CLN5_HUMAN Ceroid-lipofuscinosis neuronal protein 5 OS=Homo sapiens OX=9606 GN=CLN5 PE=1 SV=2	Color2 [DarkGray]	1	4		20.9669	21.4671	21.8424	19.9578	18.9775	20.0422
	0.321283	-0.445641	K.EN[+1540.529]LTAPGSDSAVFFEQGTTR.I	HexNAc(2)Hex(7)	N[+1541]	>sp|P00450|CERU_HUMAN Ceruloplasmin OS=Homo sapiens OX=9606 GN=CP PE=1 SV=1	Color2 [DarkGray]	1	4		19.9978	18.6291	20.0778	19.3736	20.3153	20.3528
	0.715725	-1.25317	K.EN[+1702.581]ATTDLLTK.L	HexNAc(2)Hex(8)	N[+1703]	>sp|P28799|GRN_HUMAN Progranulin OS=Homo sapiens OX=9606 GN=GRN PE=1 SV=2	Color2 [DarkGray]	1	4		19.8622	18.6348	18.4595	20.2061	21.4109	19.0989
	0.578912	1.14085	K.EN[+1702.581]GTDTVQEEEESPAEGSK.D	HexNAc(2)Hex(8)	N[+1703]	>sp|Q9Y4L1|HYOU1_HUMAN Hypoxia up-regulated protein 1 OS=Homo sapiens OX=9606 GN=HYOU1 PE=1 SV=1	Color2 [DarkGray]	1	4		22.0769	20.9449	19.3565	18.9358	20.2571	19.7629
+	2.59859	2.54721	K.EN[+1702.581]LTAPGSDSAVFFEQGTTR.I	HexNAc(2)Hex(8)	N[+1703]	>sp|P00450|CERU_HUMAN Ceruloplasmin OS=Homo sapiens OX=9606 GN=CP PE=1 SV=1	Color2 [DarkGray]	1	4		22.1954	21.6911	21.4617	18.704	19.227	19.7756
+	2.15211	-3.75663	K.EN[+1702.581]MTFGSTLVTNPNGGFLAC[+57.021]GPLYAYR.C	HexNAc(2)Hex(8)	C[+57], N[+1703]	>sp|P56199|ITA1_HUMAN Integrin alpha-1 OS=Homo sapiens OX=9606 GN=ITGA1 PE=1 SV=2	Color2 [DarkGray]	1	4		20.6078	21.1608	18.9852	23.4079	24.6031	24.0127
	1.91314	-2.31125	K.EN[+1864.634]MTFGSTLVTNPNGGFLAC[+57.021]GPLYAYR.C	HexNAc(2)Hex(9)	C[+57], N[+1865]	>sp|P56199|ITA1_HUMAN Integrin alpha-1 OS=Homo sapiens OX=9606 GN=ITGA1 PE=1 SV=2	Color2 [DarkGray]	1	4		22.1163	22.3677	22.6069	23.7195	25.4758	24.8294
	0.77853	-3.44915	K.EN[+1866.688]M[+15.995]TFGSTLVTNPNGGFLAC[+57.021]GPLYAYR.C	HexNAc(6)Hex(4)	C[+57], M[+16], N[+1867]	>sp|P56199|ITA1_HUMAN Integrin alpha-1 OS=Homo sapiens OX=9606 GN=ITGA1 PE=1 SV=2	Color2 [DarkGray]	1	4		19.186	18.8713	18.7526	19.0109	26.0533	22.0932
	0.640787	1.44358	K.EN[+1866.688]MTFGSTLVTNPNGGFLAC[+57.021]GPLYAYR.C	HexNAc(6)Hex(4)	C[+57], N[+1867]	>sp|P56199|ITA1_HUMAN Integrin alpha-1 OS=Homo sapiens OX=9606 GN=ITGA1 PE=1 SV=2	Color2 [DarkGray]	1	4		19.4822	18.5651	21.8263	18.962	18.6401	17.9409
	0.822635	0.839139	K.EN[+1913.677]LTAPGSDSAVFFEQGTTR.I	HexNAc(4)Hex(5)NeuAc(1)	N[+1914]	>sp|P00450|CERU_HUMAN Ceruloplasmin OS=Homo sapiens OX=9606 GN=CP PE=1 SV=1	Color2 [DarkGray]	1	4		23.6916	23.995	23.7106	23.8839	22.4716	22.5241
+	3.27593	4.59996	K.EN[+2059.735]LTAPGSDSAVFFEQGTTR.I	HexNAc(4)Hex(5)Fuc(1)NeuAc(1)	N[+2060]	>sp|P00450|CERU_HUMAN Ceruloplasmin OS=Homo sapiens OX=9606 GN=CP PE=1 SV=1	Color2 [DarkGray]	1	4		22.1684	23.6541	23.3469	18.4329	18.4803	18.4564
	0.195623	0.721902	K.EN[+2100.761]LTAPGSDSAVFFEQGTTR.I	HexNAc(5)Hex(4)Fuc(1)NeuAc(1)	N[+2101]	>sp|P00450|CERU_HUMAN Ceruloplasmin OS=Homo sapiens OX=9606 GN=CP PE=1 SV=1	Color2 [DarkGray]	1	4		18.0528	20.2367	22.6198	20.5298	19.474	18.7399
	0.984223	4.24914	K.EN[+2204.772]LTAPGSDSAVFFEQGTTR.I	HexNAc(4)Hex(5)NeuAc(2)	N[+2205]	>sp|P00450|CERU_HUMAN Ceruloplasmin OS=Homo sapiens OX=9606 GN=CP PE=1 SV=1	Color2 [DarkGray]	1	4		27.1167	26.9214	27.8036	25.0889	24.9855	19.0198
	0.386097	-0.897188	K.EN[+2221.788]LTAPGSDSAVFFEQGTTR.I	HexNAc(4)Hex(6)Fuc(1)NeuAc(1)	N[+2222]	>sp|P00450|CERU_HUMAN Ceruloplasmin OS=Homo sapiens OX=9606 GN=CP PE=1 SV=1	Color2 [DarkGray]	1	4		19.5885	21.8896	19.2643	21.8938	21.4045	20.1356
+	4.24365	6.94787	K.EN[+2350.830]LTAPGSDSAVFFEQGTTR.I	HexNAc(4)Hex(5)Fuc(1)NeuAc(2)	N[+2351]	>sp|P00450|CERU_HUMAN Ceruloplasmin OS=Homo sapiens OX=9606 GN=CP PE=1 SV=1	Color2 [DarkGray]	1	4		26.1735	25.8457	26.814	18.9465	19.8353	19.2078
+	2.67581	3.87103	K.EN[+2391.857]LTAPGSDSAVFFEQGTTR.I	HexNAc(5)Hex(4)Fuc(1)NeuAc(2)	N[+2392]	>sp|P00450|CERU_HUMAN Ceruloplasmin OS=Homo sapiens OX=9606 GN=CP PE=1 SV=1	Color2 [DarkGray]	1	4		23.8054	22.7499	23.6025	20.3932	19.1576	18.9941
+	2.71713	2.924	K.EN[+2861.000]LTAPGSDSAVFFEQGTTR.I	HexNAc(5)Hex(6)NeuAc(3)	N[+2861]	>sp|P00450|CERU_HUMAN Ceruloplasmin OS=Homo sapiens OX=9606 GN=CP PE=1 SV=1	Color2 [DarkGray]	1	4		22.6824	22.0372	23.2366	20.1332	19.4612	19.5898
+	2.08222	3.06905	K.EN[+3007.058]LTAPGSDSAVFFEQGTTR.I	HexNAc(5)Hex(6)Fuc(1)NeuAc(3)	N[+3007]	>sp|P00450|CERU_HUMAN Ceruloplasmin OS=Homo sapiens OX=9606 GN=CP PE=1 SV=1	Color2 [DarkGray]	1	4		21.9788	22.2198	22.1898	19.0114	20.1697	18
	0.160019	0.798299	K.ENDNFN[+1864.634]ISK.K	HexNAc(2)Hex(9)	N[+1865]	>sp|O60486|PLXC1_HUMAN Plexin-C1 OS=Homo sapiens OX=9606 GN=PLXNC1 PE=1 SV=1	Color2 [DarkGray]	1	4		19.6287	22.4436	19.9168	23.1466	18.0197	18.4279
	0.00711813	0.0131162	K.ENPVEFDSLFN[+1864.634]ESK.Y	HexNAc(2)Hex(9)	N[+1865]	>sp|O95427|PIGN_HUMAN GPI ethanolamine phosphate transferase 1 OS=Homo sapiens OX=9606 GN=PIGN PE=2 SV=1	Color2 [DarkGray]	1	4		19.5445	19.9598	19.9818	18.764	20.7977	19.8851
	1.19565	5.16119	K.ENQN[+1216.423]HSYSLK.S	HexNAc(2)Hex(5)	N[+1216]	>sp|P06756|ITAV_HUMAN Integrin alpha-V OS=Homo sapiens OX=9606 GN=ITGAV PE=1 SV=2	Color2 [DarkGray]	1	4		25.9333	26.5217	26.5015	19.3932	18.8928	25.187
	0.00168589	0.0140591	K.ENQN[+1378.476]HSYSLK.S	HexNAc(2)Hex(6)	N[+1378]	>sp|P06756|ITAV_HUMAN Integrin alpha-V OS=Homo sapiens OX=9606 GN=ITGAV PE=1 SV=2	Color2 [DarkGray]	1	4		19.0172	19.4134	25.2631	19.0961	19.7058	24.8496
+	3.73614	4.94756	K.ENQN[+1540.529]HSYSLK.S	HexNAc(2)Hex(7)	N[+1541]	>sp|P06756|ITAV_HUMAN Integrin alpha-V OS=Homo sapiens OX=9606 GN=ITGAV PE=1 SV=2	Color2 [DarkGray]	1	4		24.6367	24.2912	25.0336	19.9491	19.1036	20.0661
	0.449696	2.10743	K.ENQN[+1702.581]HSYSLK.S	HexNAc(2)Hex(8)	N[+1703]	>sp|P06756|ITAV_HUMAN Integrin alpha-V OS=Homo sapiens OX=9606 GN=ITGAV PE=1 SV=2	Color2 [DarkGray]	1	4		20.0464	18.9355	25.3945	19.5959	19.7121	18.7462
	0.809291	3.88579	K.ENQN[+1768.640]HSYSLK.S	HexNAc(4)Hex(5)Fuc(1)	N[+1769]	>sp|P06756|ITAV_HUMAN Integrin alpha-V OS=Homo sapiens OX=9606 GN=ITGAV PE=1 SV=2	Color2 [DarkGray]	1	4		25.336	25.1622	18.9269	20.2778	17.9154	19.5745
	0.297145	-1.80349	K.ENYAELLEDAFLKN[+1378.476]VTAQIC[+57.021]IDKK.C	HexNAc(2)Hex(6)	C[+57], N[+1378]	>sp|P12109|CO6A1_HUMAN Collagen alpha-1(VI) chain OS=Homo sapiens OX=9606 GN=COL6A1 PE=1 SV=3	Color2 [DarkGray]	1	4		20.1529	19.1841	18.4554	19.242	25.8486	18.1123
	0.44015	-1.43467	K.ENYAELLEDAFLKN[+1540.529]VTAQIC[+57.021]IDKK.C	HexNAc(2)Hex(7)	C[+57], N[+1541]	>sp|P12109|CO6A1_HUMAN Collagen alpha-1(VI) chain OS=Homo sapiens OX=9606 GN=COL6A1 PE=1 SV=3	Color2 [DarkGray]	1	4		19.0351	19.559	20.3607	19.6298	23.7718	19.8572
	0.43649	-2.24697	K.ENYAELLEDAFLKN[+1581.555]VTAQIC[+57.021]IDKK.C	HexNAc(3)Hex(6)	C[+57], N[+1582]	>sp|P12109|CO6A1_HUMAN Collagen alpha-1(VI) chain OS=Homo sapiens OX=9606 GN=COL6A1 PE=1 SV=3	Color2 [DarkGray]	1	4		18.6647	19.6547	19.8571	19.2848	25.9843	19.6482
	0.155794	0.258767	K.ENYAELLEDAFLKN[+1622.582]VTAQIC[+57.021]IDKK.C	HexNAc(4)Hex(5)	C[+57], N[+1623]	>sp|P12109|CO6A1_HUMAN Collagen alpha-1(VI) chain OS=Homo sapiens OX=9606 GN=COL6A1 PE=1 SV=3	Color2 [DarkGray]	1	4		20.4541	20.482	19.7309	18.9192	20.8855	20.086
	0.363607	-1.45265	K.ENYAELLEDAFLKN[+1872.651]VTAQIC[+57.021]IDK.K	HexNAc(3)Hex(6)NeuAc(1)	C[+57], N[+1873]	>sp|P12109|CO6A1_HUMAN Collagen alpha-1(VI) chain OS=Homo sapiens OX=9606 GN=COL6A1 PE=1 SV=3	Color2 [DarkGray]	1	4		18.7845	19.6614	19.2506	18.736	23.9622	19.3563
	0.222754	-0.758099	K.ENYAELLEDAFLKN[+1872.651]VTAQIC[+57.021]IDKK.C	HexNAc(3)Hex(6)NeuAc(1)	C[+57], N[+1873]	>sp|P12109|CO6A1_HUMAN Collagen alpha-1(VI) chain OS=Homo sapiens OX=9606 GN=COL6A1 PE=1 SV=3	Color2 [DarkGray]	1	4		19.2254	18.8165	19.4765	18.8075	22.5509	18.4343
	0.638178	-1.44808	K.ENYAELLEDAFLKN[+2059.735]VTAQIC[+57.021]IDK.K	HexNAc(4)Hex(5)Fuc(1)NeuAc(1)	C[+57], N[+2060]	>sp|P12109|CO6A1_HUMAN Collagen alpha-1(VI) chain OS=Homo sapiens OX=9606 GN=COL6A1 PE=1 SV=3	Color2 [DarkGray]	1	4		19.2063	19.8899	18.7799	19.6815	22.6797	19.8591
	0.0306458	-0.0659307	K.ENYAELLEDAFLKN[+2204.772]VTAQIC[+57.021]IDKK.C	HexNAc(4)Hex(5)NeuAc(2)	C[+57], N[+2205]	>sp|P12109|CO6A1_HUMAN Collagen alpha-1(VI) chain OS=Homo sapiens OX=9606 GN=COL6A1 PE=1 SV=3	Color2 [DarkGray]	1	4		20.3653	19.2625	18.1615	19.0613	18.909	20.0167
	0.197646	0.500049	K.EPGSN[+1540.529]VTMSVDAEC[+57.021]VPMVR.D	HexNAc(2)Hex(7)	C[+57], N[+1541]	>sp|Q08380|LG3BP_HUMAN Galectin-3-binding protein OS=Homo sapiens OX=9606 GN=LGALS3BP PE=1 SV=1	Color2 [DarkGray]	1	4		18.8664	20.0845	21.3092	20.6678	19.7328	18.3593
+	3.00408	2.51446	K.EPGSN[+1702.581]VTMSVDAEC[+57.021]VPMVR.D	HexNAc(2)Hex(8)	C[+57], N[+1703]	>sp|Q08380|LG3BP_HUMAN Galectin-3-binding protein OS=Homo sapiens OX=9606 GN=LGALS3BP PE=1 SV=1	Color2 [DarkGray]	1	4		22.5612	23.2711	23.0191	20.7851	20.4449	20.078
	0.397499	1.30353	K.EPGSN[+1704.635]VTMSVDAEC[+57.021]VPMVR.D	HexNAc(6)Hex(3)	C[+57], N[+1705]	>sp|Q08380|LG3BP_HUMAN Galectin-3-binding protein OS=Homo sapiens OX=9606 GN=LGALS3BP PE=1 SV=1	Color2 [DarkGray]	1	4		19.4322	18.8807	23.1061	18.3593	19.5748	19.5743
	0.446896	0.125481	K.EPGSN[+1864.634]VTMSVDAEC[+57.021]VPMVR.D	HexNAc(2)Hex(9)	C[+57], N[+1865]	>sp|Q08380|LG3BP_HUMAN Galectin-3-binding protein OS=Homo sapiens OX=9606 GN=LGALS3BP PE=1 SV=1	Color2 [DarkGray]	1	4		19.4189	19.5927	19.5306	19.1825	19.5558	19.4275
	0.35298	1.53049	K.EQYIHEN[+1216.423]YSR.A	HexNAc(2)Hex(5)	N[+1216]	>sp|O60568|PLOD3_HUMAN Multifunctional procollagen lysine hydroxylase and glycosyltransferase LH3 OS=Homo sapiens OX=9606 GN=PLOD3 PE=1 SV=1	Color2 [DarkGray]	1	4		19.4919	21.6566	24.774	19.9483	19.1069	22.276
	0.65	1.40586	K.EQYIHEN[+1241.454]YSR.A	HexNAc(3)Hex(3)Fuc(1)	N[+1241]	>sp|O60568|PLOD3_HUMAN Multifunctional procollagen lysine hydroxylase and glycosyltransferase LH3 OS=Homo sapiens OX=9606 GN=PLOD3 PE=1 SV=1	Color2 [DarkGray]	1	4		19.9488	19.7841	22.7848	19.6054	19.3637	19.331
	0.815589	2.0952	K.EQYIHEN[+1378.476]YSR.A	HexNAc(2)Hex(6)	N[+1378]	>sp|O60568|PLOD3_HUMAN Multifunctional procollagen lysine hydroxylase and glycosyltransferase LH3 OS=Homo sapiens OX=9606 GN=PLOD3 PE=1 SV=1	Color2 [DarkGray]	1	4		26.6107	25.6675	26.8927	26.2346	22.3203	24.3304
+	3.21506	4.06351	K.EQYIHEN[+1444.534]YSR.A	HexNAc(4)Hex(3)Fuc(1)	N[+1445]	>sp|O60568|PLOD3_HUMAN Multifunctional procollagen lysine hydroxylase and glycosyltransferase LH3 OS=Homo sapiens OX=9606 GN=PLOD3 PE=1 SV=1	Color2 [DarkGray]	1	4		24.0109	24.0387	24.2777	20.0569	20.7434	19.3364
	1.89644	3.51155	K.EQYIHEN[+1540.529]YSR.A	HexNAc(2)Hex(7)	N[+1541]	>sp|O60568|PLOD3_HUMAN Multifunctional procollagen lysine hydroxylase and glycosyltransferase LH3 OS=Homo sapiens OX=9606 GN=PLOD3 PE=1 SV=1	Color2 [DarkGray]	1	4		23.3287	22.4709	23.6328	20.7059	19.9779	18.2139
+	2.46526	2.24578	K.EQYIHEN[+1702.581]YSR.A	HexNAc(2)Hex(8)	N[+1703]	>sp|O60568|PLOD3_HUMAN Multifunctional procollagen lysine hydroxylase and glycosyltransferase LH3 OS=Homo sapiens OX=9606 GN=PLOD3 PE=1 SV=1	Color2 [DarkGray]	1	4		25.585	24.8038	25.8113	22.9809	23.542	22.9398
	1.28834	2.75184	K.EQYIHEN[+1864.634]YSR.A	HexNAc(2)Hex(9)	N[+1865]	>sp|O60568|PLOD3_HUMAN Multifunctional procollagen lysine hydroxylase and glycosyltransferase LH3 OS=Homo sapiens OX=9606 GN=PLOD3 PE=1 SV=1	Color2 [DarkGray]	1	4		23.626	22.9822	23.8067	22.6537	19.6285	19.8771
	0.399117	0.575424	K.ETIGDYTWTN[+1589.571]GSQPC[+57.021]VHLQAQIQIR.V	HexNAc(4)Hex(3)NeuAc(1)	C[+57], N[+1590]	>sp|P34810|CD68_HUMAN Macrosialin OS=Homo sapiens OX=9606 GN=CD68 PE=1 SV=2	Color2 [DarkGray]	1	4		21.2362	19.6493	20.5354	19.1009	20.2133	20.3805
	0.831916	2.45673	K.ETIGDYTWTN[+2424.867]GSQPC[+57.021]VHLQAQIQIR.V	HexNAc(5)Hex(6)Fuc(1)NeuAc(1)	C[+57], N[+2425]	>sp|P34810|CD68_HUMAN Macrosialin OS=Homo sapiens OX=9606 GN=CD68 PE=1 SV=2	Color2 [DarkGray]	1	4		18.9052	23.0695	22.9158	19.3449	19.2569	18.9185
	0.462348	1.20944	K.ETIGDYTWTN[+2715.963]GSQPC[+57.021]VHLQAQIQIR.V	HexNAc(5)Hex(6)Fuc(1)NeuAc(2)	C[+57], N[+2716]	>sp|P34810|CD68_HUMAN Macrosialin OS=Homo sapiens OX=9606 GN=CD68 PE=1 SV=2	Color2 [DarkGray]	1	4		18.8842	22.0895	22.1896	19.6607	19.4156	20.4587
	0.727739	0.983488	K.ETIGDYTWTN[+2717.978]GSQPC[+57.021]VHLQAQIQIR.V	HexNAc(7)Hex(8)	C[+57], N[+2718]	>sp|P34810|CD68_HUMAN Macrosialin OS=Homo sapiens OX=9606 GN=CD68 PE=1 SV=2	Color2 [DarkGray]	1	4		20.2767	20.0777	21.1896	20.5613	19.0533	18.979
	0.474975	1.48648	K.EVN[+1768.640]DTLLVNELK.S	HexNAc(4)Hex(5)Fuc(1)	N[+1769]	>sp|Q15063|POSTN_HUMAN Periostin OS=Homo sapiens OX=9606 GN=POSTN PE=1 SV=2	Color2 [DarkGray]	1	4		24.213	23.5591	24.573	23.8485	24.0549	19.9821
	1.0621	-1.84962	K.EVN[+1809.666]DTLLVNELK.S	HexNAc(5)Hex(4)Fuc(1)	N[+1810]	>sp|Q15063|POSTN_HUMAN Periostin OS=Homo sapiens OX=9606 GN=POSTN PE=1 SV=2	Color2 [DarkGray]	1	4		19.9439	17.5092	18.7015	21.3929	20.2845	20.0261
	1.02166	-3.40933	K.EVN[+1971.719]DTLLVNELK.S	HexNAc(5)Hex(5)Fuc(1)	N[+1972]	>sp|Q15063|POSTN_HUMAN Periostin OS=Homo sapiens OX=9606 GN=POSTN PE=1 SV=2	Color2 [DarkGray]	1	4		18.0558	19.6616	19.8479	24.4498	23.626	19.7175
	1.68158	-0.984559	K.EVN[+2059.735]DTLLVNELK.S	HexNAc(4)Hex(5)Fuc(1)NeuAc(1)	N[+2060]	>sp|Q15063|POSTN_HUMAN Periostin OS=Homo sapiens OX=9606 GN=POSTN PE=1 SV=2	Color2 [DarkGray]	1	4		24.4566	24.7042	24.7137	26.1067	25.435	25.2863
	0.519056	-2.08413	K.EVN[+2262.814]DTLLVNELK.S	HexNAc(5)Hex(5)Fuc(1)NeuAc(1)	N[+2263]	>sp|Q15063|POSTN_HUMAN Periostin OS=Homo sapiens OX=9606 GN=POSTN PE=1 SV=2	Color2 [DarkGray]	1	4		19.0618	19.0519	19.7096	24.7484	20.4158	18.9115
	0.737796	1.91426	K.EVN[+2350.830]DTLLVNELK.S	HexNAc(4)Hex(5)Fuc(1)NeuAc(2)	N[+2351]	>sp|Q15063|POSTN_HUMAN Periostin OS=Homo sapiens OX=9606 GN=POSTN PE=1 SV=2	Color2 [DarkGray]	1	4		22.3582	19.0959	21.6782	20.1942	17.9386	19.2566
	0.372633	-0.590859	K.EVN[+2878.015]DTLLVNELK.S	HexNAc(5)Hex(7)Fuc(1)NeuAc(2)	N[+2878]	>sp|Q15063|POSTN_HUMAN Periostin OS=Homo sapiens OX=9606 GN=POSTN PE=1 SV=2	Color2 [DarkGray]	1	4		19.3748	20.0029	19.283	21.3929	19.4847	19.5557
	0.358193	-1.40398	K.FAEIN[+1216.423]GSALC[+57.021]SYNLKPSEYTTSPK.S	HexNAc(2)Hex(5)	C[+57], N[+1216]	>sp|Q8WWI5|CTL1_HUMAN Choline transporter-like protein 1 OS=Homo sapiens OX=9606 GN=SLC44A1 PE=1 SV=1	Color2 [DarkGray]	1	4		21.8483	18.5975	21.8017	24.314	22.084	20.0614
	0.128656	-0.270894	K.FAEIN[+1378.476]GSALC[+57.021]SYNLKPSEYTTSPK.S	HexNAc(2)Hex(6)	C[+57], N[+1378]	>sp|Q8WWI5|CTL1_HUMAN Choline transporter-like protein 1 OS=Homo sapiens OX=9606 GN=SLC44A1 PE=1 SV=1	Color2 [DarkGray]	1	4		24.4594	24.3224	23.2498	25.6155	23.4804	23.7483
	0.801668	-1.73305	K.FAEIN[+1540.529]GSALC[+57.021]SYNLKPSEYTTSPK.S	HexNAc(2)Hex(7)	C[+57], N[+1541]	>sp|Q8WWI5|CTL1_HUMAN Choline transporter-like protein 1 OS=Homo sapiens OX=9606 GN=SLC44A1 PE=1 SV=1	Color2 [DarkGray]	1	4		19.2427	20.4505	19.2435	20.6538	23.1956	20.2865
	0.345944	-0.270699	K.FAEIN[+1581.555]GSALC[+57.021]SYNLKPSEYTTSPK.S	HexNAc(3)Hex(6)	C[+57], N[+1582]	>sp|Q8WWI5|CTL1_HUMAN Choline transporter-like protein 1 OS=Homo sapiens OX=9606 GN=SLC44A1 PE=1 SV=1	Color2 [DarkGray]	1	4		20.6838	19.5995	19.952	20.2997	20.2854	20.4623
	0.0432372	0.151756	K.FAN[+1216.423]NTEGQC[+57.021]GTC[+57.021]TNDR.K	HexNAc(2)Hex(5)	C[+57]*2, N[+1216]	>sp|P98088|MUC5A_HUMAN Mucin-5AC OS=Homo sapiens OX=9606 GN=MUC5AC PE=1 SV=4	Color2 [DarkGray]	1	4		19.3002	21.7426	17.844	19.9973	19.6812	18.753
	0.885079	-2.20232	K.FDVNQLQN[+1540.529]TTIK.R	HexNAc(2)Hex(7)	N[+1541]	>sp|P12821|ACE_HUMAN Angiotensin-converting enzyme OS=Homo sapiens OX=9606 GN=ACE PE=1 SV=1	Color2 [DarkGray]	1	4		20.1688	18.3309	19.7414	23.3434	19.8199	21.6848
	1.69456	2.98083	K.FFQN[+1702.581]VTAEDTDSIGLALFAPHSSR.N	HexNAc(2)Hex(8)	N[+1703]	>sp|Q8TEM1|PO210_HUMAN Nuclear pore membrane glycoprotein 210 OS=Homo sapiens OX=9606 GN=NUP210 PE=1 SV=3	Color2 [DarkGray]	1	4		21.9553	22.2958	22.1429	18.0255	20.6785	18.7474
	0.650544	1.35131	K.FGHSPLVN[+1702.581]LTGGLSHASDVVLYHQHK.Q	HexNAc(2)Hex(8)	N[+1703]	>sp|Q07954|LRP1_HUMAN Prolow-density lipoprotein receptor-related protein 1 OS=Homo sapiens OX=9606 GN=LRP1 PE=1 SV=2	Color2 [DarkGray]	1	4		20.5295	21.3252	22.513	20.8719	18.6218	20.82
	0.954741	-3.85901	K.FGHSPLVN[+1768.640]LTGGLSHASDVVLYHQHK.Q	HexNAc(4)Hex(5)Fuc(1)	N[+1769]	>sp|Q07954|LRP1_HUMAN Prolow-density lipoprotein receptor-related protein 1 OS=Homo sapiens OX=9606 GN=LRP1 PE=1 SV=2	Color2 [DarkGray]	1	4		19.3104	19.7283	20.1308	23.144	27.0303	20.5723
	0.379106	0.775908	K.FGHSPLVN[+1864.634]LTGGLSHASDVVLYHQHK.Q	HexNAc(2)Hex(9)	N[+1865]	>sp|Q07954|LRP1_HUMAN Prolow-density lipoprotein receptor-related protein 1 OS=Homo sapiens OX=9606 GN=LRP1 PE=1 SV=2	Color2 [DarkGray]	1	4		20.0114	21.7186	18.9671	19.4259	18.9366	20.0069
	0.401434	1.44935	K.FGHSPLVN[+2059.735]LTGGLSHASDVVLYHQHK.Q	HexNAc(4)Hex(5)Fuc(1)NeuAc(1)	N[+2060]	>sp|Q07954|LRP1_HUMAN Prolow-density lipoprotein receptor-related protein 1 OS=Homo sapiens OX=9606 GN=LRP1 PE=1 SV=2	Color2 [DarkGray]	1	4		26.0872	26.6398	26.1659	25.909	26.7834	21.8525
	0.36831	-1.40146	K.FHLAN[+1809.666]R.T	HexNAc(5)Hex(4)Fuc(1)	N[+1810]	>sp|Q9NRN5|OLFL3_HUMAN Olfactomedin-like protein 3 OS=Homo sapiens OX=9606 GN=OLFML3 PE=2 SV=1	Color2 [DarkGray]	1	4		20.0333	19.9007	19.4393	24.3512	19.4813	19.7451
+	2.35343	-6.53152	K.FHLAN[+2059.735]R.T	HexNAc(4)Hex(5)Fuc(1)NeuAc(1)	N[+2060]	>sp|Q9NRN5|OLFL3_HUMAN Olfactomedin-like protein 3 OS=Homo sapiens OX=9606 GN=OLFML3 PE=2 SV=1	Color2 [DarkGray]	1	4		18.7738	19.2033	19.3378	26.5325	23.4184	26.9586
	0.655714	-2.25242	K.FHLAN[+2100.761]R.T	HexNAc(5)Hex(4)Fuc(1)NeuAc(1)	N[+2101]	>sp|Q9NRN5|OLFL3_HUMAN Olfactomedin-like protein 3 OS=Homo sapiens OX=9606 GN=OLFML3 PE=2 SV=1	Color2 [DarkGray]	1	4		19.35	18.6287	19.2876	19.796	19.8117	24.4158
	0.384076	-2.54679	K.FHLAN[+2350.830]R.T	HexNAc(4)Hex(5)Fuc(1)NeuAc(2)	N[+2351]	>sp|Q9NRN5|OLFL3_HUMAN Olfactomedin-like protein 3 OS=Homo sapiens OX=9606 GN=OLFML3 PE=2 SV=1	Color2 [DarkGray]	1	4		18.2175	19.4636	19.2718	17.6093	20.1205	26.8635
	0.215524	-0.273967	K.FHVN[+1378.476]YTQPLVAVK.F	HexNAc(2)Hex(6)	N[+1378]	>sp|P14415|AT1B2_HUMAN Sodium/potassium-transporting ATPase subunit beta-2 OS=Homo sapiens OX=9606 GN=ATP1B2 PE=1 SV=3	Color2 [DarkGray]	1	4		18.6087	19.9796	19.1596	19.2743	19.1894	20.1061
	0.0556596	0.192472	K.FLEPYN[+1581.555]DSIQAQK.N	HexNAc(3)Hex(6)	N[+1582]	>sp|P14415|AT1B2_HUMAN Sodium/potassium-transporting ATPase subunit beta-2 OS=Homo sapiens OX=9606 GN=ATP1B2 PE=1 SV=3	Color2 [DarkGray]	1	4		18.9553	17.9331	21.5606	18.3589	20.1094	19.4032
	0.319029	1.54425	K.FLKPYTLEEQKN[+1768.640]LTVC[+57.021]PDGALFEQK.G	HexNAc(4)Hex(5)Fuc(1)	C[+57], N[+1769]	>sp|P54709|AT1B3_HUMAN Sodium/potassium-transporting ATPase subunit beta-3 OS=Homo sapiens OX=9606 GN=ATP1B3 PE=1 SV=1	Color2 [DarkGray]	1	4		23.1276	22.8048	23.6182	25.5362	20.1847	19.1969
	0.0702179	0.189761	K.FLKPYTLEEQKN[+2059.735]LTVC[+57.021]PDGALFEQK.G	HexNAc(4)Hex(5)Fuc(1)NeuAc(1)	C[+57], N[+2060]	>sp|P54709|AT1B3_HUMAN Sodium/potassium-transporting ATPase subunit beta-3 OS=Homo sapiens OX=9606 GN=ATP1B3 PE=1 SV=1	Color2 [DarkGray]	1	4		20.588	19.097	21.4238	21.4899	19.5946	19.455
	1.84714	3.81516	K.FLKPYTLEEQKN[+2350.830]LTVC[+57.021]PDGALFEQK.G	HexNAc(4)Hex(5)Fuc(1)NeuAc(2)	C[+57], N[+2351]	>sp|P54709|AT1B3_HUMAN Sodium/potassium-transporting ATPase subunit beta-3 OS=Homo sapiens OX=9606 GN=ATP1B3 PE=1 SV=1	Color2 [DarkGray]	1	4		21.6622	23.0374	24.628	19.6612	19.587	18.6339
	0.567595	1.30504	K.FLKPYTLEEQKN[+2952.052]LTVC[+57.021]PDGALFEQK.G	HexNAc(6)Hex(8)Fuc(1)NeuAc(1)	C[+57], N[+2952]	>sp|P54709|AT1B3_HUMAN Sodium/potassium-transporting ATPase subunit beta-3 OS=Homo sapiens OX=9606 GN=ATP1B3 PE=1 SV=1	Color2 [DarkGray]	1	4		19.4403	20.1691	22.7912	19.4219	19.6827	19.3809
	0.591506	-1.78386	K.FLN[+1872.651]LTSEK.V	HexNAc(3)Hex(6)NeuAc(1)	N[+1873]	>sp|P49961|ENTP1_HUMAN Ectonucleoside triphosphate diphosphohydrolase 1 OS=Homo sapiens OX=9606 GN=ENTPD1 PE=1 SV=1	Color2 [DarkGray]	1	4		19.1344	18.7426	18.2194	22.9855	19.9652	18.4974
	0.211159	0.301294	K.FLN[+2204.772]DTMAVYEAK.L	HexNAc(4)Hex(5)NeuAc(2)	N[+2205]	>sp|P29622|KAIN_HUMAN Kallistatin OS=Homo sapiens OX=9606 GN=SERPINA4 PE=1 SV=3	Color2 [DarkGray]	1	4		20.2479	18.964	20.2747	20.1195	18.9247	19.5386
	0.606689	1.37143	K.FLNN[+1702.581]GTC[+57.021]TAEGK.F	HexNAc(2)Hex(8)	C[+57], N[+1703]	>sp|P05156|CFAI_HUMAN Complement factor I OS=Homo sapiens OX=9606 GN=CFI PE=1 SV=2	Color2 [DarkGray]	1	4		20.252	22.5325	19.6073	19.0071	20.4012	18.8693
	0.0226349	-0.0409533	K.FLNN[+1864.634]GTC[+57.021]TAEGK.F	HexNAc(2)Hex(9)	C[+57], N[+1865]	>sp|P05156|CFAI_HUMAN Complement factor I OS=Homo sapiens OX=9606 GN=CFI PE=1 SV=2	Color2 [DarkGray]	1	4		19.4745	18.6317	18.6495	19.8779	18.0199	18.9808
	0.583073	2.58084	K.FLNN[+2204.772]GTC[+57.021]TAEGK.F	HexNAc(4)Hex(5)NeuAc(2)	C[+57], N[+2205]	>sp|P05156|CFAI_HUMAN Complement factor I OS=Homo sapiens OX=9606 GN=CFI PE=1 SV=2	Color2 [DarkGray]	1	4		25.0351	19.4262	19.0495	18.2235	19.3663	18.1786
	1.90923	4.43203	K.FN[+1378.476]SSSSSLEEK.I	HexNAc(2)Hex(6)	N[+1378]	>sp|Q9H173|SIL1_HUMAN Nucleotide exchange factor SIL1 OS=Homo sapiens OX=9606 GN=SIL1 PE=1 SV=1	Color2 [DarkGray]	1	4		23.7098	20.9976	24.2122	18.9863	18.3025	18.3346
	0.118188	-0.341451	K.FN[+1378.476]TSLAGDLTNLVHGSHC[+57.021]SK.Y	HexNAc(2)Hex(6)	C[+57], N[+1378]	>sp|Q5VU97|CAHD1_HUMAN VWFA and cache domain-containing protein 1 OS=Homo sapiens OX=9606 GN=CACHD1 PE=2 SV=2	Color2 [DarkGray]	1	4		19.8014	20.0394	18.3787	19.9978	21.1935	18.0526
	0.0297572	-0.0986767	K.FN[+1540.529]SSSSSLEEK.I	HexNAc(2)Hex(7)	N[+1541]	>sp|Q9H173|SIL1_HUMAN Nucleotide exchange factor SIL1 OS=Homo sapiens OX=9606 GN=SIL1 PE=1 SV=1	Color2 [DarkGray]	1	4		22.3668	20.5299	18.7718	20.1824	20.3119	21.4703
	0.0209037	0.118468	K.FN[+1864.634]FSK.P	HexNAc(2)Hex(9)	N[+1865]	>sp|Q09666|AHNK_HUMAN Neuroblast differentiation-associated protein AHNAK OS=Homo sapiens OX=9606 GN=AHNAK PE=1 SV=2	Color2 [DarkGray]	1	4		24.4845	19.8458	24.6149	23.2583	24.4576	20.874
	0.474376	1.47138	K.FN[+1864.634]FSK.R	HexNAc(2)Hex(9)	N[+1865]	>sp|Q99571|P2RX4_HUMAN P2X purinoceptor 4 OS=Homo sapiens OX=9606 GN=P2RX4 PE=1 SV=2	Color2 [DarkGray]	1	4		19.9726	23.5205	19.239	19.0686	19.9103	19.339
	0.670919	-1.3103	K.FN[+2059.735]TTYINIGSSYFPEHGYFR.A	HexNAc(4)Hex(5)Fuc(1)NeuAc(1)	N[+2060]	>sp|Q9H8L6|MMRN2_HUMAN Multimerin-2 OS=Homo sapiens OX=9606 GN=MMRN2 PE=1 SV=2	Color2 [DarkGray]	1	4		18.7344	17.6108	20.5778	19.9634	20.2588	20.6317
	0.784683	1.7596	K.FN[+2204.772]LTETSEAEIHQSFQHLLR.T	HexNAc(4)Hex(5)NeuAc(2)	N[+2205]	>sp|P01011|AACT_HUMAN Alpha-1-antichymotrypsin OS=Homo sapiens OX=9606 GN=SERPINA3 PE=1 SV=2	Color2 [DarkGray]	1	4		19.1644	22.7265	21.0655	19.0874	19.1566	19.4336
	1.59821	5.27171	K.FN[+2861.000]LTETSEAEIHQSFQHLLR.T	HexNAc(5)Hex(6)NeuAc(3)	N[+2861]	>sp|P01011|AACT_HUMAN Alpha-1-antichymotrypsin OS=Homo sapiens OX=9606 GN=SERPINA3 PE=1 SV=2	Color2 [DarkGray]	1	4		26.4776	25.8737	26.5756	19.2365	24.0078	19.8674
	0.501503	-0.783441	K.FSEDHLN[+1622.582]ITC[+57.021]SATAR.P	HexNAc(4)Hex(5)	C[+57], N[+1623]	>sp|P41217|OX2G_HUMAN OX-2 membrane glycoprotein OS=Homo sapiens OX=9606 GN=CD200 PE=1 SV=4	Color2 [DarkGray]	1	4		19.4626	19.4122	18.8381	19.7602	21.2591	19.0438
	1.77072	-3.11914	K.FSEDHLN[+1710.598]ITC[+57.021]SATAR.P	HexNAc(3)Hex(5)NeuAc(1)	C[+57], N[+1711]	>sp|P41217|OX2G_HUMAN OX-2 membrane glycoprotein OS=Homo sapiens OX=9606 GN=CD200 PE=1 SV=4	Color2 [DarkGray]	1	4		19.1809	19.2058	18.4725	23.5767	21.414	21.2259
	0.275729	-1.20902	K.FSEDHLN[+1913.677]ITC[+57.021]SATAR.P	HexNAc(4)Hex(5)NeuAc(1)	C[+57], N[+1914]	>sp|P41217|OX2G_HUMAN OX-2 membrane glycoprotein OS=Homo sapiens OX=9606 GN=CD200 PE=1 SV=4	Color2 [DarkGray]	1	4		19.9068	19.2785	22.6739	24.6261	20.0223	20.8379
	0.762074	3.11967	K.FTPPVVN[+1702.581]VTWLR.N	HexNAc(2)Hex(8)	N[+1703]	>sp|P01903|DRA_HUMAN HLA class II histocompatibility antigen, DR alpha chain OS=Homo sapiens OX=9606 GN=HLA-DRA PE=1 SV=2	Color2 [DarkGray]	1	4		25.1942	19.6166	24.6818	21.2746	19.4395	19.4196
	1.61416	2.29082	K.FTPPVVN[+1864.634]VTWLR.N	HexNAc(2)Hex(9)	N[+1865]	>sp|P01903|DRA_HUMAN HLA class II histocompatibility antigen, DR alpha chain OS=Homo sapiens OX=9606 GN=HLA-DRA PE=1 SV=2	Color2 [DarkGray]	1	4		25.5434	24.6613	26.2388	24.0297	23.1064	22.4349
	0.22179	0.641855	K.FTPPVVN[+1872.651]VTWLR.N	HexNAc(3)Hex(6)NeuAc(1)	N[+1873]	>sp|P01903|DRA_HUMAN HLA class II histocompatibility antigen, DR alpha chain OS=Homo sapiens OX=9606 GN=HLA-DRA PE=1 SV=2	Color2 [DarkGray]	1	4		22.9155	19.5663	21.0063	21.1018	19.3655	21.0953
	1.26104	-3.48871	K.FVEGSHN[+1419.502]STVSLTTK.N	HexNAc(3)Hex(5)	N[+1420]	>sp|P04114|APOB_HUMAN Apolipoprotein B-100 OS=Homo sapiens OX=9606 GN=APOB PE=1 SV=2	Color2 [DarkGray]	1	4		19.2603	18.6607	19.3497	23.6658	24.0432	20.0279
	0.908546	-2.30626	K.FVEGSHN[+1548.545]STVSLTTK.N	HexNAc(3)Hex(4)NeuAc(1)	N[+1549]	>sp|P04114|APOB_HUMAN Apolipoprotein B-100 OS=Homo sapiens OX=9606 GN=APOB PE=1 SV=2	Color2 [DarkGray]	1	4		18.6347	19.1477	19.7158	22.8405	22.374	19.2025
+	2.64789	-4.38303	K.FVEGSHN[+1622.582]STVSLTTK.N	HexNAc(4)Hex(5)	N[+1623]	>sp|P04114|APOB_HUMAN Apolipoprotein B-100 OS=Homo sapiens OX=9606 GN=APOB PE=1 SV=2	Color2 [DarkGray]	1	4		19.9765	18.8815	20.1295	24.425	24.644	23.0676
	0.0702982	-0.605696	K.FVEGSHN[+1710.598]STVSLTTK.N	HexNAc(3)Hex(5)NeuAc(1)	N[+1711]	>sp|P04114|APOB_HUMAN Apolipoprotein B-100 OS=Homo sapiens OX=9606 GN=APOB PE=1 SV=2	Color2 [DarkGray]	1	4		24.0075	18.2026	24.2789	23.9984	25.9412	18.3665
	0.568197	3.05601	K.FVEGSHN[+1913.677]STVSLTTK.N	HexNAc(4)Hex(5)NeuAc(1)	N[+1914]	>sp|P04114|APOB_HUMAN Apolipoprotein B-100 OS=Homo sapiens OX=9606 GN=APOB PE=1 SV=2	Color2 [DarkGray]	1	4		24.1916	23.7186	25.4982	26.0748	19.0928	19.0728
	0.302894	-0.709709	K.FVEGSHN[+2204.772]STVSLTTK.N	HexNAc(4)Hex(5)NeuAc(2)	N[+2205]	>sp|P04114|APOB_HUMAN Apolipoprotein B-100 OS=Homo sapiens OX=9606 GN=APOB PE=1 SV=2	Color2 [DarkGray]	1	4		20.1553	18.5899	20.3946	21.7309	20.4628	19.0752
	0.597852	-2.28314	K.FVEGSHN[+2701.983]STVSLTTK.N	HexNAc(7)Hex(7)Fuc(1)	N[+2702]	>sp|P04114|APOB_HUMAN Apolipoprotein B-100 OS=Homo sapiens OX=9606 GN=APOB PE=1 SV=2	Color2 [DarkGray]	1	4		18.86	19.3833	18.3053	24.425	20.0686	18.9045
	1.80655	1.59982	K.FVGTPEVN[+1702.581]QTTLYQR.Y	HexNAc(2)Hex(8)	N[+1703]	>sp|P01033|TIMP1_HUMAN Metalloproteinase inhibitor 1 OS=Homo sapiens OX=9606 GN=TIMP1 PE=1 SV=1	Color2 [DarkGray]	1	4		21.6717	21.863	21.5942	19.8204	20.8779	19.6311
+	2.68276	4.39127	K.FVGTPEVN[+2350.830]QTTLYQR.Y	HexNAc(4)Hex(5)Fuc(1)NeuAc(2)	N[+2351]	>sp|P01033|TIMP1_HUMAN Metalloproteinase inhibitor 1 OS=Homo sapiens OX=9606 GN=TIMP1 PE=1 SV=1	Color2 [DarkGray]	1	4		23.3284	23.4659	25.0282	18.9703	19.9006	19.7778
	1.35938	-0.833741	K.FWNKFLEN[+1403.507]KSPWR.K	HexNAc(3)Hex(4)Fuc(1)	N[+1404]	>sp|O95139|NDUB6_HUMAN NADH dehydrogenase [ubiquinone] 1 beta subcomplex subunit 6 OS=Homo sapiens OX=9606 GN=NDUFB6 PE=1 SV=3	Color2 [DarkGray]	1	4		19.0476	19.5178	19.4622	20.3447	20.4909	19.6932
	0.155398	-0.408178	K.FWNKFLEN[+1768.640]KSPWR.K	HexNAc(4)Hex(5)Fuc(1)	N[+1769]	>sp|O95139|NDUB6_HUMAN NADH dehydrogenase [ubiquinone] 1 beta subcomplex subunit 6 OS=Homo sapiens OX=9606 GN=NDUFB6 PE=1 SV=3	Color2 [DarkGray]	1	4		18.0368	19.7855	19.8591	21.1891	19.0083	18.7085
+	2.21447	-7.36585	K.FWNKFLEN[+2059.735]KSPWR.K	HexNAc(4)Hex(5)Fuc(1)NeuAc(1)	N[+2060]	>sp|O95139|NDUB6_HUMAN NADH dehydrogenase [ubiquinone] 1 beta subcomplex subunit 6 OS=Homo sapiens OX=9606 GN=NDUFB6 PE=1 SV=3	Color2 [DarkGray]	1	4		20.4446	19.4342	19.8687	24.5624	28.6274	28.6552
	0.462659	-2.0694	K.GAFISN[+2204.772]FSMTVDGK.T	HexNAc(4)Hex(5)NeuAc(2)	N[+2205]	>sp|P19823|ITIH2_HUMAN Inter-alpha-trypsin inhibitor heavy chain H2 OS=Homo sapiens OX=9606 GN=ITIH2 PE=1 SV=2	Color2 [DarkGray]	1	4		20.7432	19.3457	23.8331	24.8466	24.7188	20.5648
	0.264487	0.559766	K.GC[+57.021]SSSTSVLLTLDNNVVN[+2059.735]GSSPAIR.T	HexNAc(4)Hex(5)Fuc(1)NeuAc(1)	C[+57], N[+2060]	>sp|P07996|TSP1_HUMAN Thrombospondin-1 OS=Homo sapiens OX=9606 GN=THBS1 PE=1 SV=2	Color2 [DarkGray]	1	4		19.9851	18.6771	21.3857	19.5872	18.8483	19.9331
	0.00660168	-0.00591977	K.GDQLILNLNN[+2059.735]ISSDR.I	HexNAc(4)Hex(5)Fuc(1)NeuAc(1)	N[+2060]	>sp|Q8TDL5|BPIB1_HUMAN BPI fold-containing family B member 1 OS=Homo sapiens OX=9606 GN=BPIFB1 PE=1 SV=1	Color2 [DarkGray]	1	4		19.2015	19.5859	18.9086	18.8155	19.3461	19.5521
+	3.74626	5.30849	K.GDQLILNLNN[+2350.830]ISSDR.I	HexNAc(4)Hex(5)Fuc(1)NeuAc(2)	N[+2351]	>sp|Q8TDL5|BPIB1_HUMAN BPI fold-containing family B member 1 OS=Homo sapiens OX=9606 GN=BPIFB1 PE=1 SV=1	Color2 [DarkGray]	1	4		24.9456	24.4215	25.0002	20.1538	19.3137	18.9743
	1.37174	-3.49549	K.GELN[+1378.476]TSIFSSR.P	HexNAc(2)Hex(6)	N[+1378]	>sp|Q9UHG3|PCYOX_HUMAN Prenylcysteine oxidase 1 OS=Homo sapiens OX=9606 GN=PCYOX1 PE=1 SV=3	Color2 [DarkGray]	1	4		20.2632	18.6664	20.2544	24.8576	23.5894	21.2234
	0.153803	0.836156	K.GELN[+1378.476]TSIFSSRPIDK.F	HexNAc(2)Hex(6)	N[+1378]	>sp|Q9UHG3|PCYOX_HUMAN Prenylcysteine oxidase 1 OS=Homo sapiens OX=9606 GN=PCYOX1 PE=1 SV=3	Color2 [DarkGray]	1	4		24.1423	23.9564	25.0828	26.301	24.7109	19.6611
	1.12191	-2.15067	K.GELN[+1540.529]TSIFSSR.P	HexNAc(2)Hex(7)	N[+1541]	>sp|Q9UHG3|PCYOX_HUMAN Prenylcysteine oxidase 1 OS=Homo sapiens OX=9606 GN=PCYOX1 PE=1 SV=3	Color2 [DarkGray]	1	4		22.4766	20.6425	21.8995	24.9286	24.0727	22.4693
	0.424348	-0.729212	K.GELN[+1540.529]TSIFSSRPIDK.F	HexNAc(2)Hex(7)	N[+1541]	>sp|Q9UHG3|PCYOX_HUMAN Prenylcysteine oxidase 1 OS=Homo sapiens OX=9606 GN=PCYOX1 PE=1 SV=3	Color2 [DarkGray]	1	4		24.5132	26.1909	26.3377	27.2413	25.7333	26.2548
	0.128037	-0.990217	K.GELN[+1702.581]TSIFSSR.P	HexNAc(2)Hex(8)	N[+1703]	>sp|Q9UHG3|PCYOX_HUMAN Prenylcysteine oxidase 1 OS=Homo sapiens OX=9606 GN=PCYOX1 PE=1 SV=3	Color2 [DarkGray]	1	4		23.2969	22.1561	19.1436	25.7648	24.3157	17.4868
	0.698923	-3.11883	K.GELN[+1702.581]TSIFSSRPIDK.F	HexNAc(2)Hex(8)	N[+1703]	>sp|Q9UHG3|PCYOX_HUMAN Prenylcysteine oxidase 1 OS=Homo sapiens OX=9606 GN=PCYOX1 PE=1 SV=3	Color2 [DarkGray]	1	4		18.986	25.7475	23.7004	26.6402	25.6966	25.4536
	0.274927	-0.615886	K.GELN[+1864.634]TSIFSSR.P	HexNAc(2)Hex(9)	N[+1865]	>sp|Q9UHG3|PCYOX_HUMAN Prenylcysteine oxidase 1 OS=Homo sapiens OX=9606 GN=PCYOX1 PE=1 SV=3	Color2 [DarkGray]	1	4		21.9699	22.5565	22.436	21.1894	23.6117	24.009
	1.15375	-4.2969	K.GELN[+1864.634]TSIFSSRPIDK.F	HexNAc(2)Hex(9)	N[+1865]	>sp|Q9UHG3|PCYOX_HUMAN Prenylcysteine oxidase 1 OS=Homo sapiens OX=9606 GN=PCYOX1 PE=1 SV=3	Color2 [DarkGray]	1	4		22.357	22.4896	17.1709	24.9902	24.9958	24.9221
	0.543717	-1.28639	K.GFEESEPVSGSFTTALDGPSGLVTAN[+1768.640]ITDSEALAR.W	HexNAc(4)Hex(5)Fuc(1)	N[+1769]	>sp|P24821|TENA_HUMAN Tenascin OS=Homo sapiens OX=9606 GN=TNC PE=1 SV=3	Color2 [DarkGray]	1	4		20.6696	19.508	20.7442	20.0892	23.3952	21.2966
	0.604613	1.09571	K.GFEESEPVSGSFTTALDGPSGLVTAN[+2059.735]ITDSEALAR.W	HexNAc(4)Hex(5)Fuc(1)NeuAc(1)	N[+2060]	>sp|P24821|TENA_HUMAN Tenascin OS=Homo sapiens OX=9606 GN=TNC PE=1 SV=3	Color2 [DarkGray]	1	4		21.8444	19.5537	19.7721	18.589	19.7286	19.5656
	0.767751	1.52021	K.GFEESEPVSGSFTTALDGPSGLVTAN[+2350.830]ITDSEALAR.W	HexNAc(4)Hex(5)Fuc(1)NeuAc(2)	N[+2351]	>sp|P24821|TENA_HUMAN Tenascin OS=Homo sapiens OX=9606 GN=TNC PE=1 SV=3	Color2 [DarkGray]	1	4		21.33	19.0485	21.9632	19.4445	18.8259	19.5106
	0.697406	1.26506	K.GFEESEPVSGSFTTALDGPSGLVTAN[+2352.846]ITDSEALAR.W	HexNAc(6)Hex(7)	N[+2353]	>sp|P24821|TENA_HUMAN Tenascin OS=Homo sapiens OX=9606 GN=TNC PE=1 SV=3	Color2 [DarkGray]	1	4		21.33	19.3449	19.7209	19.6301	17.7768	19.1938
+	2.12501	2.83678	K.GFYLDGSDTIVC[+57.021]DSN[+2350.830]STWDPPVPK.C	HexNAc(4)Hex(5)Fuc(1)NeuAc(2)	C[+57], N[+2351]	>sp|P15529|MCP_HUMAN Membrane cofactor protein OS=Homo sapiens OX=9606 GN=CD46 PE=1 SV=3	Color2 [DarkGray]	1	4		21.6343	22.0975	22.1479	19.6931	19.6397	18.0366
	1.16431	2.19835	K.GGETAQSADPQWEQLNNKN[+2204.772]LSMPLLPADFHK.E	HexNAc(4)Hex(5)NeuAc(2)	N[+2205]	>sp|P05546|HEP2_HUMAN Heparin cofactor 2 OS=Homo sapiens OX=9606 GN=SERPIND1 PE=1 SV=3	Color2 [DarkGray]	1	4		21.7658	22.4105	22.3192	18.4919	21.4863	19.9223
	0.113118	0.360099	K.GHDLNEDGLVSWEEYKN[+1444.534]ATYGYVLDDPDPDDGFNYK.Q	HexNAc(4)Hex(3)Fuc(1)	N[+1445]	>sp|O43852|CALU_HUMAN Calumenin OS=Homo sapiens OX=9606 GN=CALU PE=1 SV=2	Color2 [DarkGray]	1	4		18.8678	19.0494	21.801	19.848	20.5035	18.2864
	0.426771	0.877845	K.GHHVSQEPWN[+1054.370]SSITLTSQAGAVFQSFAK.F	HexNAc(2)Hex(4)	N[+1054]	>sp|O00115|DNS2A_HUMAN Deoxyribonuclease-2-alpha OS=Homo sapiens OX=9606 GN=DNASE2 PE=1 SV=2	Color2 [DarkGray]	1	4		19.0297	21.4507	18.8805	19.446	18.7765	18.5048
	0.441601	0.995866	K.GHHVSQEPWN[+1216.423]SSITLTSQAGAVFQSFAK.F	HexNAc(2)Hex(5)	N[+1216]	>sp|O00115|DNS2A_HUMAN Deoxyribonuclease-2-alpha OS=Homo sapiens OX=9606 GN=DNASE2 PE=1 SV=2	Color2 [DarkGray]	1	4		21.9923	22.0935	19.3241	20.0666	19.5941	20.7617
	0.108751	0.24456	K.GHHVSQEPWN[+1378.476]SSITLTSQAGAVFQSFAK.F	HexNAc(2)Hex(6)	N[+1378]	>sp|O00115|DNS2A_HUMAN Deoxyribonuclease-2-alpha OS=Homo sapiens OX=9606 GN=DNASE2 PE=1 SV=2	Color2 [DarkGray]	1	4		19.5892	21.6104	18.982	19.7215	20.1485	19.578
	0.357543	0.664717	K.GHHVSQEPWN[+2075.730]SSITLTSQAGAVFQSFAK.F	HexNAc(4)Hex(6)NeuAc(1)	N[+2076]	>sp|O00115|DNS2A_HUMAN Deoxyribonuclease-2-alpha OS=Homo sapiens OX=9606 GN=DNASE2 PE=1 SV=2	Color2 [DarkGray]	1	4		20.6415	21.4507	19.6146	20.7595	20.1113	18.8418
+	2.11418	-3.41564	K.GIFSDVTASVC[+57.021]N[+1378.476]SSK.V	HexNAc(2)Hex(6)	C[+57], N[+1378]	>sp|A6NMZ7|CO6A6_HUMAN Collagen alpha-6(VI) chain OS=Homo sapiens OX=9606 GN=COL6A6 PE=1 SV=2	Color2 [DarkGray]	1	4		18.8797	21.0269	19.0988	23.0997	22.9196	23.2331
+	3.35577	-6.94322	K.GIFSDVTASVC[+57.021]N[+1540.529]SSK.V	HexNAc(2)Hex(7)	C[+57], N[+1541]	>sp|A6NMZ7|CO6A6_HUMAN Collagen alpha-6(VI) chain OS=Homo sapiens OX=9606 GN=COL6A6 PE=1 SV=2	Color2 [DarkGray]	1	4		18.7216	20.0337	19.282	27.3477	25.8025	25.7168
+	3.21053	-8.0328	K.GIFSDVTASVC[+57.021]N[+1702.581]SSK.V	HexNAc(2)Hex(8)	C[+57], N[+1703]	>sp|A6NMZ7|CO6A6_HUMAN Collagen alpha-6(VI) chain OS=Homo sapiens OX=9606 GN=COL6A6 PE=1 SV=2	Color2 [DarkGray]	1	4		19.5072	19.8695	19.9146	28.9071	28.2683	26.2143
+	5.64393	-9.33197	K.GIFSDVTASVC[+57.021]N[+1864.634]SSK.V	HexNAc(2)Hex(9)	C[+57], N[+1865]	>sp|A6NMZ7|CO6A6_HUMAN Collagen alpha-6(VI) chain OS=Homo sapiens OX=9606 GN=COL6A6 PE=1 SV=2	Color2 [DarkGray]	1	4		19.5428	19.6483	19.8116	28.7562	29.4347	28.8076
+	3.90869	-6.70279	K.GIFSDVTASVC[+57.021]N[+2026.687]SSK.V	HexNAc(2)Hex(10)	C[+57], N[+2027]	>sp|A6NMZ7|CO6A6_HUMAN Collagen alpha-6(VI) chain OS=Homo sapiens OX=9606 GN=COL6A6 PE=1 SV=2	Color2 [DarkGray]	1	4		18.6255	19.0068	20.044	25.6107	26.1653	26.0086
	0.568294	1.30303	K.GISYYIGAQSN[+1864.634]FTK.L	HexNAc(2)Hex(9)	N[+1865]	>sp|Q9UN76|S6A14_HUMAN Sodium- and chloride-dependent neutral and basic amino acid transporter B(0+) OS=Homo sapiens OX=9606 GN=SLC6A14 PE=2 SV=1	Color2 [DarkGray]	1	4		22.5565	20.0485	19.3605	19.8113	19.4808	18.7642
	0.81158	1.73965	K.GLN[+1378.476]LTEDTYKPR.I	HexNAc(2)Hex(6)	N[+1378]	>sp|Q08380|LG3BP_HUMAN Galectin-3-binding protein OS=Homo sapiens OX=9606 GN=LGALS3BP PE=1 SV=1	Color2 [DarkGray]	1	4		20.3677	19.7795	22.3293	18.4924	20.3338	18.4314
+	3.07492	5.94691	K.GLN[+1540.529]LTEDTYKPR.I	HexNAc(2)Hex(7)	N[+1541]	>sp|Q08380|LG3BP_HUMAN Galectin-3-binding protein OS=Homo sapiens OX=9606 GN=LGALS3BP PE=1 SV=1	Color2 [DarkGray]	1	4		25.2609	25.3746	26.2468	19.0519	20.8438	19.1458
	0.0962446	-0.179537	K.GLN[+1694.603]LTEDTYKPR.I	HexNAc(3)Hex(4)Fuc(1)NeuAc(1)	N[+1695]	>sp|Q08380|LG3BP_HUMAN Galectin-3-binding protein OS=Homo sapiens OX=9606 GN=LGALS3BP PE=1 SV=1	Color2 [DarkGray]	1	4		19.0154	20.5858	18.8656	18.9693	19.7695	20.2665
	1.78631	7.07675	K.GLN[+1702.581]LTEDTYKPR.I	HexNAc(2)Hex(8)	N[+1703]	>sp|Q08380|LG3BP_HUMAN Galectin-3-binding protein OS=Homo sapiens OX=9606 GN=LGALS3BP PE=1 SV=1	Color2 [DarkGray]	1	4		27.101	27.5607	27.602	23.6226	19.8597	17.5511
	0.838695	1.23779	K.GLN[+1864.634]LTEDTYKPR.I	HexNAc(2)Hex(9)	N[+1865]	>sp|Q08380|LG3BP_HUMAN Galectin-3-binding protein OS=Homo sapiens OX=9606 GN=LGALS3BP PE=1 SV=1	Color2 [DarkGray]	1	4		24.7952	26.0912	25.1938	22.9876	24.7155	24.6638
	0.183567	-0.766804	K.GLN[+2026.687]LTEDTYKPR.I	HexNAc(2)Hex(10)	N[+2027]	>sp|Q08380|LG3BP_HUMAN Galectin-3-binding protein OS=Homo sapiens OX=9606 GN=LGALS3BP PE=1 SV=1	Color2 [DarkGray]	1	4		23.271	23.5613	19.3032	21.3723	24.1585	22.9051
	0.589844	-1.62143	K.GLNNLAKLGLSFNSISAVDN[+2100.761]GSLANTPHLR.E	HexNAc(5)Hex(4)Fuc(1)NeuAc(1)	N[+2101]	>sp|P07585|PGS2_HUMAN Decorin OS=Homo sapiens OX=9606 GN=DCN PE=1 SV=1	Color2 [DarkGray]	1	4		18.7345	19.4969	20.4853	20.056	20.0947	23.4302
	1.53636	2.30559	K.GMC[+57.021]YFTN[+1540.529]GTER.V	HexNAc(2)Hex(7)	C[+57], N[+1541]	>sp|P05538|DQB2_HUMAN HLA class II histocompatibility antigen, DQ beta 2 chain OS=Homo sapiens OX=9606 GN=HLA-DQB2 PE=1 SV=2	Color2 [DarkGray]	1	4		22.1559	20.5582	22.5975	19.8928	19.637	18.865
	0.769871	2.23842	K.GMC[+57.021]YFTN[+1702.581]GTER.V	HexNAc(2)Hex(8)	C[+57], N[+1703]	>sp|P05538|DQB2_HUMAN HLA class II histocompatibility antigen, DQ beta 2 chain OS=Homo sapiens OX=9606 GN=HLA-DQB2 PE=1 SV=2	Color2 [DarkGray]	1	4		23.4126	19.093	20.374	19.4834	18.4834	18.1976
+	3.25274	5.27413	K.GMC[+57.021]YFTN[+1864.634]GTER.V	HexNAc(2)Hex(9)	C[+57], N[+1865]	>sp|P05538|DQB2_HUMAN HLA class II histocompatibility antigen, DQ beta 2 chain OS=Homo sapiens OX=9606 GN=HLA-DQB2 PE=1 SV=2	Color2 [DarkGray]	1	4		24.3487	23.5369	25.0701	18.6224	18.9237	19.5873
	0.137143	0.449139	K.GN[+1768.640]TTTLISENGHAADTLTATNFR.V	HexNAc(4)Hex(5)Fuc(1)	N[+1769]	>sp|Q14766|LTBP1_HUMAN Latent-transforming growth factor beta-binding protein 1 OS=Homo sapiens OX=9606 GN=LTBP1 PE=1 SV=4	Color2 [DarkGray]	1	4		20.1547	19.378	21.1558	21.9685	18.6276	18.745
	0.518989	0.472696	K.GN[+2059.735]TTTLISENGHAADTLTATNFR.V	HexNAc(4)Hex(5)Fuc(1)NeuAc(1)	N[+2060]	>sp|Q14766|LTBP1_HUMAN Latent-transforming growth factor beta-binding protein 1 OS=Homo sapiens OX=9606 GN=LTBP1 PE=1 SV=4	Color2 [DarkGray]	1	4		19.7586	19.7657	20.1563	18.9428	20.1665	19.1532
	0.887811	1.10859	K.GNYDFVQAMIVNN[+1540.529]HTSLDVEEAAAVR.A	HexNAc(2)Hex(7)	N[+1541]	>sp|Q6PIU2|NCEH1_HUMAN Neutral cholesterol ester hydrolase 1 OS=Homo sapiens OX=9606 GN=NCEH1 PE=1 SV=3	Color2 [DarkGray]	1	4		19.0007	19.6145	20.7865	19.1218	18.2447	18.7095
	0.494808	-0.652869	K.GNYDFVQAMIVNN[+1565.560]HTSLDVEEAAAVR.A	HexNAc(3)Hex(5)Fuc(1)	N[+1566]	>sp|Q6PIU2|NCEH1_HUMAN Neutral cholesterol ester hydrolase 1 OS=Homo sapiens OX=9606 GN=NCEH1 PE=1 SV=3	Color2 [DarkGray]	1	4		19.7644	18.8104	20.443	20.9087	19.777	20.2907
	0.583596	-2.61764	K.GNYDFVQAMIVNN[+1702.581]HTSLDVEEAAAVR.A	HexNAc(2)Hex(8)	N[+1703]	>sp|Q6PIU2|NCEH1_HUMAN Neutral cholesterol ester hydrolase 1 OS=Homo sapiens OX=9606 GN=NCEH1 PE=1 SV=3	Color2 [DarkGray]	1	4		21.2307	19.9576	19.3827	19.0671	25.4644	23.8925
+	2.76017	4.99756	K.GPN[+1216.423]C[+57.021]SEPEC[+57.021]PGNC[+57.021]HLR.G	HexNAc(2)Hex(5)	C[+57]*3, N[+1216]	>sp|P24821|TENA_HUMAN Tenascin OS=Homo sapiens OX=9606 GN=TNC PE=1 SV=3	Color2 [DarkGray]	1	4		25.3128	24.8058	26.0455	19.3245	21.2558	20.5912
	0.589884	1.35185	K.GPN[+1241.454]C[+57.021]SEPEC[+57.021]PGNC[+57.021]HLR.G	HexNAc(3)Hex(3)Fuc(1)	C[+57]*3, N[+1241]	>sp|P24821|TENA_HUMAN Tenascin OS=Homo sapiens OX=9606 GN=TNC PE=1 SV=3	Color2 [DarkGray]	1	4		19.0218	21.3709	22.4904	19.6095	19.5114	19.7066
	0.694604	1.72905	K.GPN[+1403.507]C[+57.021]SEPEC[+57.021]PGNC[+57.021]HLR.G	HexNAc(3)Hex(4)Fuc(1)	C[+57]*3, N[+1404]	>sp|P24821|TENA_HUMAN Tenascin OS=Homo sapiens OX=9606 GN=TNC PE=1 SV=3	Color2 [DarkGray]	1	4		18.9453	19.8497	22.6947	18.9491	18.7477	18.6058
	0.401258	0.862406	K.GPN[+1444.534]C[+57.021]SEPEC[+57.021]PGNC[+57.021]HLR.G	HexNAc(4)Hex(3)Fuc(1)	C[+57]*3, N[+1445]	>sp|P24821|TENA_HUMAN Tenascin OS=Homo sapiens OX=9606 GN=TNC PE=1 SV=3	Color2 [DarkGray]	1	4		19.1043	21.8642	19.339	19.1838	19.6432	18.8933
+	2.23799	4.5336	K.GPN[+1768.640]C[+57.021]SEPEC[+57.021]PGNC[+57.021]HLR.G	HexNAc(4)Hex(5)Fuc(1)	C[+57]*3, N[+1769]	>sp|P24821|TENA_HUMAN Tenascin OS=Homo sapiens OX=9606 GN=TNC PE=1 SV=3	Color2 [DarkGray]	1	4		26.2847	26.9978	25.5398	21.8255	20.4347	22.9612
+	2.40307	6.48061	K.GPN[+2059.735]C[+57.021]SEPEC[+57.021]PGNC[+57.021]HLR.G	HexNAc(4)Hex(5)Fuc(1)NeuAc(1)	C[+57]*3, N[+2060]	>sp|P24821|TENA_HUMAN Tenascin OS=Homo sapiens OX=9606 GN=TNC PE=1 SV=3	Color2 [DarkGray]	1	4		26.7056	27.8804	27.0064	20.131	19.3056	22.7141
+	3.59382	5.51497	K.GPN[+2100.761]C[+57.021]SEPEC[+57.021]PGNC[+57.021]HLR.G	HexNAc(5)Hex(4)Fuc(1)NeuAc(1)	C[+57]*3, N[+2101]	>sp|P24821|TENA_HUMAN Tenascin OS=Homo sapiens OX=9606 GN=TNC PE=1 SV=3	Color2 [DarkGray]	1	4		24.9651	25.2157	23.9131	19.2843	18.7826	19.4822
+	3.42931	4.58124	K.GPN[+2350.830]C[+57.021]SEPEC[+57.021]PGNC[+57.021]HLR.G	HexNAc(4)Hex(5)Fuc(1)NeuAc(2)	C[+57]*3, N[+2351]	>sp|P24821|TENA_HUMAN Tenascin OS=Homo sapiens OX=9606 GN=TNC PE=1 SV=3	Color2 [DarkGray]	1	4		24.23	23.5988	24.8921	19.9911	19.4022	19.5839
	0.610764	2.26362	K.GPN[+2424.867]C[+57.021]SEPEC[+57.021]PGNC[+57.021]HLR.G	HexNAc(5)Hex(6)Fuc(1)NeuAc(1)	C[+57]*3, N[+2425]	>sp|P24821|TENA_HUMAN Tenascin OS=Homo sapiens OX=9606 GN=TNC PE=1 SV=3	Color2 [DarkGray]	1	4		19.9517	24.3724	19.0858	18.9532	19.3324	18.3335
	0.0539308	-0.0636063	K.GPN[+2715.963]C[+57.021]SEPEC[+57.021]PGNC[+57.021]HLR.G	HexNAc(5)Hex(6)Fuc(1)NeuAc(2)	C[+57]*3, N[+2716]	>sp|P24821|TENA_HUMAN Tenascin OS=Homo sapiens OX=9606 GN=TNC PE=1 SV=3	Color2 [DarkGray]	1	4		18.8287	18.999	18.8075	18.4655	18.6197	19.7408
+	2.73364	4.38215	K.GPN[+2789.999]C[+57.021]SEPEC[+57.021]PGNC[+57.021]HLR.G	HexNAc(6)Hex(7)Fuc(1)NeuAc(1)	C[+57]*3, N[+2790]	>sp|P24821|TENA_HUMAN Tenascin OS=Homo sapiens OX=9606 GN=TNC PE=1 SV=3	Color2 [DarkGray]	1	4		24.4986	23.6673	24.4939	20.3662	18.7769	20.3702
	0.00737997	-0.0314471	K.GPSLLNANLLDSLWDTFQN[+1540.529]K.S	HexNAc(2)Hex(7)	N[+1541]	>sp|A6NMZ7|CO6A6_HUMAN Collagen alpha-6(VI) chain OS=Homo sapiens OX=9606 GN=COL6A6 PE=1 SV=2	Color2 [DarkGray]	1	4		19.9965	20.0641	19.9062	19.031	18.2487	22.7814
	1.05062	-3.32266	K.GPSLLNANLLDSLWDTFQN[+1702.581]K.S	HexNAc(2)Hex(8)	N[+1703]	>sp|A6NMZ7|CO6A6_HUMAN Collagen alpha-6(VI) chain OS=Homo sapiens OX=9606 GN=COL6A6 PE=1 SV=2	Color2 [DarkGray]	1	4		20.2982	17.9814	19.2868	20.5935	25.0564	21.8844
	0.0231176	0.043239	K.GPSLLNANLLDSLWDTFQN[+1864.634]K.S	HexNAc(2)Hex(9)	N[+1865]	>sp|A6NMZ7|CO6A6_HUMAN Collagen alpha-6(VI) chain OS=Homo sapiens OX=9606 GN=COL6A6 PE=1 SV=2	Color2 [DarkGray]	1	4		18.6211	19.0419	19.9164	18.7516	18.564	20.134
	0.425395	-0.679439	K.GPSLLNANLLDSLWDTFQN[+2586.920]K.S	HexNAc(5)Hex(7)Fuc(1)NeuAc(1)	N[+2587]	>sp|A6NMZ7|CO6A6_HUMAN Collagen alpha-6(VI) chain OS=Homo sapiens OX=9606 GN=COL6A6 PE=1 SV=2	Color2 [DarkGray]	1	4		19.024	19.4098	19.5835	18.9013	21.1912	19.9632
+	2.09796	4.07278	K.GPTN[+1378.476]NTC[+57.021]VVR.T	HexNAc(2)Hex(6)	C[+57], N[+1378]	>sp|Q8TEM1|PO210_HUMAN Nuclear pore membrane glycoprotein 210 OS=Homo sapiens OX=9606 GN=NUP210 PE=1 SV=3	Color2 [DarkGray]	1	4		22.8088	23.3177	25.0733	20.004	18.7383	20.2392
+	2.87413	4.39357	K.GPTN[+1540.529]NTC[+57.021]VVR.T	HexNAc(2)Hex(7)	C[+57], N[+1541]	>sp|Q8TEM1|PO210_HUMAN Nuclear pore membrane glycoprotein 210 OS=Homo sapiens OX=9606 GN=NUP210 PE=1 SV=3	Color2 [DarkGray]	1	4		23.0192	23.7455	24.3721	18.5451	19.751	19.6599
+	2.39925	5.11421	K.GPTN[+1702.581]NTC[+57.021]VVR.T	HexNAc(2)Hex(8)	C[+57], N[+1703]	>sp|Q8TEM1|PO210_HUMAN Nuclear pore membrane glycoprotein 210 OS=Homo sapiens OX=9606 GN=NUP210 PE=1 SV=3	Color2 [DarkGray]	1	4		23.1888	24.0499	25.9881	19.7465	19.0143	19.1234
	0.742044	1.94829	K.GPTN[+1864.634]NTC[+57.021]VVR.T	HexNAc(2)Hex(9)	C[+57], N[+1865]	>sp|Q8TEM1|PO210_HUMAN Nuclear pore membrane glycoprotein 210 OS=Homo sapiens OX=9606 GN=NUP210 PE=1 SV=3	Color2 [DarkGray]	1	4		21.2811	23.5092	19.7859	20.0988	18.517	20.1155
	2.64716	-1.07845	K.GPYTLQGLLGC[+57.021]ELGPDN[+2059.735]TSVPTAK.F	HexNAc(4)Hex(5)Fuc(1)NeuAc(1)	C[+57], N[+2060]	>sp|P55899|FCGRN_HUMAN IgG receptor FcRn large subunit p51 OS=Homo sapiens OX=9606 GN=FCGRT PE=1 SV=1	Color2 [DarkGray]	1	4		22.6136	22.7943	22.692	23.9416	23.9068	23.4869
	0.329316	-1.12124	K.GPYTLQGLLGC[+57.021]ELGPDN[+2075.730]TSVPTAK.F	HexNAc(4)Hex(6)NeuAc(1)	C[+57], N[+2076]	>sp|P55899|FCGRN_HUMAN IgG receptor FcRn large subunit p51 OS=Homo sapiens OX=9606 GN=FCGRT PE=1 SV=1	Color2 [DarkGray]	1	4		19.7007	18.9703	19.657	17.8981	21.2692	22.5244
	0.917757	1.78831	K.GPYTLQGLLGC[+57.021]ELGPDN[+2350.830]TSVPTAK.F	HexNAc(4)Hex(5)Fuc(1)NeuAc(2)	C[+57], N[+2351]	>sp|P55899|FCGRN_HUMAN IgG receptor FcRn large subunit p51 OS=Homo sapiens OX=9606 GN=FCGRT PE=1 SV=1	Color2 [DarkGray]	1	4		23.0415	23.7232	23.723	21.8195	23.1749	20.1284
	1.30705	1.54485	K.GQSYSVN[+1054.370]VTFTSNIQSK.S	HexNAc(2)Hex(4)	N[+1054]	>sp|P61916|NPC2_HUMAN NPC intracellular cholesterol transporter 2 OS=Homo sapiens OX=9606 GN=NPC2 PE=1 SV=1	Color2 [DarkGray]	1	4		21.9478	20.4998	21.0222	18.9438	19.7279	20.1635
	0.887673	1.27546	K.GQSYSVN[+1216.423]VTFTSNIQSK.S	HexNAc(2)Hex(5)	N[+1216]	>sp|P61916|NPC2_HUMAN NPC intracellular cholesterol transporter 2 OS=Homo sapiens OX=9606 GN=NPC2 PE=1 SV=1	Color2 [DarkGray]	1	4		21.5647	19.4369	19.8536	19.1337	18.6985	19.1965
	1.05138	2.14757	K.GQTALGFLYASGLGVN[+1702.581]SSQAK.A	HexNAc(2)Hex(8)	N[+1703]	>sp|Q9UBV2|SE1L1_HUMAN Protein sel-1 homolog 1 OS=Homo sapiens OX=9606 GN=SEL1L PE=1 SV=3	Color2 [DarkGray]	1	4		20.869	22.5633	23.0517	21.2424	19.964	18.835
	1.55068	1.14334	K.GQTALGFLYASGLGVN[+1864.634]SSQAK.A	HexNAc(2)Hex(9)	N[+1865]	>sp|Q9UBV2|SE1L1_HUMAN Protein sel-1 homolog 1 OS=Homo sapiens OX=9606 GN=SEL1L PE=1 SV=3	Color2 [DarkGray]	1	4		22.401	21.6414	22.2444	21.1267	20.462	21.268
	0.694035	-1.06377	K.GQTEIQVNC[+57.021]PPAVTEN[+1540.529]K.T	HexNAc(2)Hex(7)	C[+57], N[+1541]	>sp|Q16563|SYPL1_HUMAN Synaptophysin-like protein 1 OS=Homo sapiens OX=9606 GN=SYPL1 PE=1 SV=1	Color2 [DarkGray]	1	4		18.5136	20.1153	19.6599	19.4918	20.8235	21.1647
+	3.36643	-4.27435	K.GQTEIQVNC[+57.021]PPAVTEN[+1581.555]K.T	HexNAc(3)Hex(6)	C[+57], N[+1582]	>sp|Q16563|SYPL1_HUMAN Synaptophysin-like protein 1 OS=Homo sapiens OX=9606 GN=SYPL1 PE=1 SV=1	Color2 [DarkGray]	1	4		19.2209	18.1314	18.1177	22.9733	22.4501	22.8696
	0.342035	-0.523507	K.GQTEIQVNC[+57.021]PPAVTEN[+1710.598]K.T	HexNAc(3)Hex(5)NeuAc(1)	C[+57], N[+1711]	>sp|Q16563|SYPL1_HUMAN Synaptophysin-like protein 1 OS=Homo sapiens OX=9606 GN=SYPL1 PE=1 SV=1	Color2 [DarkGray]	1	4		18.9328	19.6303	18.3227	19.0041	18.9505	20.5017
	0.150121	0.799382	K.GQTEIQVNC[+57.021]PPAVTEN[+1872.651]K.T	HexNAc(3)Hex(6)NeuAc(1)	C[+57], N[+1873]	>sp|Q16563|SYPL1_HUMAN Synaptophysin-like protein 1 OS=Homo sapiens OX=9606 GN=SYPL1 PE=1 SV=1	Color2 [DarkGray]	1	4		24.2017	24.3114	24.928	25.5255	25.7778	19.7396
+	2.37843	2.47863	K.GQTEIQVNC[+57.021]PPAVTEN[+2018.708]K.T	HexNAc(3)Hex(6)Fuc(1)NeuAc(1)	C[+57], N[+2019]	>sp|Q16563|SYPL1_HUMAN Synaptophysin-like protein 1 OS=Homo sapiens OX=9606 GN=SYPL1 PE=1 SV=1	Color2 [DarkGray]	1	4		21.0761	22.1802	21.399	19.0552	19.5412	18.6229
	1.59437	2.00994	K.GQTEIQVNC[+57.021]PPAVTEN[+2237.783]K.T	HexNAc(4)Hex(7)NeuAc(1)	C[+57], N[+2238]	>sp|Q16563|SYPL1_HUMAN Synaptophysin-like protein 1 OS=Homo sapiens OX=9606 GN=SYPL1 PE=1 SV=1	Color2 [DarkGray]	1	4		20.47	22.0782	21.1055	19.8557	19.0641	18.704
	0.56595	-1.34669	K.GQVYLQC[+57.021]GTPC[+57.021]N[+1768.640]LTC[+57.021]R.S	HexNAc(4)Hex(5)Fuc(1)	C[+57]*3, N[+1769]	>sp|P04275|VWF_HUMAN von Willebrand factor OS=Homo sapiens OX=9606 GN=VWF PE=1 SV=4	Color2 [DarkGray]	1	4		19.2333	18.8891	19.6445	22.097	21.0935	18.6165
	1.4855	-1.17711	K.GQVYLQC[+57.021]GTPC[+57.021]N[+1864.634]LTC[+57.021]R.S	HexNAc(2)Hex(9)	C[+57]*3, N[+1865]	>sp|P04275|VWF_HUMAN von Willebrand factor OS=Homo sapiens OX=9606 GN=VWF PE=1 SV=4	Color2 [DarkGray]	1	4		18.5564	19.0539	19.5776	20.454	19.8024	20.4628
	1.73988	-4.77721	K.GQVYLQC[+57.021]GTPC[+57.021]N[+2059.735]LTC[+57.021]R.S	HexNAc(4)Hex(5)Fuc(1)NeuAc(1)	C[+57]*3, N[+2060]	>sp|P04275|VWF_HUMAN von Willebrand factor OS=Homo sapiens OX=9606 GN=VWF PE=1 SV=4	Color2 [DarkGray]	1	4		21.157	20.2732	18.6836	25.7451	25.8942	22.8062
	0.450895	-1.37468	K.GRDIYTFDGALN[+1378.476]K.S	HexNAc(2)Hex(6)	N[+1378]	>sp|Q08722|CD47_HUMAN Leukocyte surface antigen CD47 OS=Homo sapiens OX=9606 GN=CD47 PE=1 SV=1	Color2 [DarkGray]	1	4		20.6397	18.2276	19.103	22.7628	20.3592	18.9724
+	4.15803	-5.11835	K.GRDIYTFDGALN[+1540.529]K.S	HexNAc(2)Hex(7)	N[+1541]	>sp|Q08722|CD47_HUMAN Leukocyte surface antigen CD47 OS=Homo sapiens OX=9606 GN=CD47 PE=1 SV=1	Color2 [DarkGray]	1	4		19.3814	18.7406	19.5946	24.2824	24.6569	24.1322
	0.826633	-4.07786	K.GRDIYTFDGALN[+1581.555]K.S	HexNAc(3)Hex(6)	N[+1582]	>sp|Q08722|CD47_HUMAN Leukocyte surface antigen CD47 OS=Homo sapiens OX=9606 GN=CD47 PE=1 SV=1	Color2 [DarkGray]	1	4		20.2006	18.8262	18.6078	25.3286	25.7075	18.8321
+	2.27852	-3.73854	K.GRDIYTFDGALN[+1872.651]K.S	HexNAc(3)Hex(6)NeuAc(1)	N[+1873]	>sp|Q08722|CD47_HUMAN Leukocyte surface antigen CD47 OS=Homo sapiens OX=9606 GN=CD47 PE=1 SV=1	Color2 [DarkGray]	1	4		20.7954	18.6344	18.9875	23.0006	23.3114	23.321
	0.155377	0.649223	K.GSLSYLN[+1378.476]VTR.K	HexNAc(2)Hex(6)	N[+1378]	>sp|P07339|CATD_HUMAN Cathepsin D OS=Homo sapiens OX=9606 GN=CTSD PE=1 SV=1	Color2 [DarkGray]	1	4		22.0239	19.9466	20.766	18.9566	23.1425	18.6898
	0.522131	0.863935	K.GSLSYLN[+1540.529]VTR.K	HexNAc(2)Hex(7)	N[+1541]	>sp|P07339|CATD_HUMAN Cathepsin D OS=Homo sapiens OX=9606 GN=CTSD PE=1 SV=1	Color2 [DarkGray]	1	4		26.0984	24.9374	25.6732	25.9238	24.4552	23.7382
+	2.43533	4.82358	K.GSLSYLN[+1702.581]VTR.K	HexNAc(2)Hex(8)	N[+1703]	>sp|P07339|CATD_HUMAN Cathepsin D OS=Homo sapiens OX=9606 GN=CTSD PE=1 SV=1	Color2 [DarkGray]	1	4		24.5917	24.5166	24.7336	19.6094	21.2387	18.5231
	0.330918	0.747439	K.GSTLSQWSLGN[+1702.581]GTPVTSK.G	HexNAc(2)Hex(8)	N[+1703]	>sp|Q7Z2K6|ERMP1_HUMAN Endoplasmic reticulum metallopeptidase 1 OS=Homo sapiens OX=9606 GN=ERMP1 PE=1 SV=2	Color2 [DarkGray]	1	4		18.4878	21.5731	20.4959	19.017	19.755	19.5425
	0.390334	-0.680464	K.GTDPSLSPSPAALPPAPGTELSYLN[+1565.560]GTFR.L	HexNAc(3)Hex(5)Fuc(1)	N[+1566]	>sp|Q9UBG0|MRC2_HUMAN C-type mannose receptor 2 OS=Homo sapiens OX=9606 GN=MRC2 PE=1 SV=2	Color2 [DarkGray]	1	4		19.6024	19.4213	20.3978	21.83	19.83	19.8029
	0.801617	-2.33905	K.GTDPSLSPSPAALPPAPGTELSYLN[+1581.555]GTFR.L	HexNAc(3)Hex(6)	N[+1582]	>sp|Q9UBG0|MRC2_HUMAN C-type mannose receptor 2 OS=Homo sapiens OX=9606 GN=MRC2 PE=1 SV=2	Color2 [DarkGray]	1	4		20.5892	20.9106	21.3815	22.1865	25.9463	21.7656
	0.106338	-0.413122	K.GTDPSLSPSPAALPPAPGTELSYLN[+1606.587]GTFR.L	HexNAc(4)Hex(4)Fuc(1)	N[+1607]	>sp|Q9UBG0|MRC2_HUMAN C-type mannose receptor 2 OS=Homo sapiens OX=9606 GN=MRC2 PE=1 SV=2	Color2 [DarkGray]	1	4		19.5901	18.4719	20.5213	22.0814	17.6864	20.055
	0.38875	-1.42974	K.GTDPSLSPSPAALPPAPGTELSYLN[+1768.640]GTFR.L	HexNAc(4)Hex(5)Fuc(1)	N[+1769]	>sp|Q9UBG0|MRC2_HUMAN C-type mannose receptor 2 OS=Homo sapiens OX=9606 GN=MRC2 PE=1 SV=2	Color2 [DarkGray]	1	4		18.8477	22.2945	19.2042	22.8779	22.39	19.3676
	1.14315	1.09523	K.GTEVN[+1378.476]TTVIGENDPIDEVQGFLFGK.L	HexNAc(2)Hex(6)	N[+1378]	>sp|Q9NYU2|UGGG1_HUMAN UDP-glucose:glycoprotein glucosyltransferase 1 OS=Homo sapiens OX=9606 GN=UGGT1 PE=1 SV=3	Color2 [DarkGray]	1	4		19.9058	20.67	20.6246	18.552	19.6907	19.6721
	0.284278	0.8465	K.GTGN[+2204.772]DTVLNVALLNVISNQEC[+57.021]NIK.H	HexNAc(4)Hex(5)NeuAc(2)	C[+57], N[+2205]	>sp|P26927|HGFL_HUMAN Hepatocyte growth factor-like protein OS=Homo sapiens OX=9606 GN=MST1 PE=1 SV=2	Color2 [DarkGray]	1	4		22.2452	18.6778	21.4619	20.2096	18.9473	20.6886
	0.226415	-0.515135	K.GTSTC[+57.021]DKDVIQVSHVLN[+1540.529]DTHMK.F	HexNAc(2)Hex(7)	C[+57], N[+1541]	>sp|O60486|PLXC1_HUMAN Plexin-C1 OS=Homo sapiens OX=9606 GN=PLXNC1 PE=1 SV=1	Color2 [DarkGray]	1	4		20.1129	18.7561	20.5246	21.6968	19.9098	19.3324
	0.134239	-0.394728	K.GTSTC[+57.021]DKDVIQVSHVLN[+1864.634]DTHMK.F	HexNAc(2)Hex(9)	C[+57], N[+1865]	>sp|O60486|PLXC1_HUMAN Plexin-C1 OS=Homo sapiens OX=9606 GN=PLXNC1 PE=1 SV=1	Color2 [DarkGray]	1	4		19.1565	19.8492	19.3241	19.0635	21.9406	18.5098
	0.337882	-0.566137	K.GVN[+1606.587]VTMPAQPGTPPLSSTQLQIDPSLHEFQLVDLSR.R	HexNAc(4)Hex(4)Fuc(1)	N[+1607]	>sp|P98160|PGBM_HUMAN Basement membrane-specific heparan sulfate proteoglycan core protein OS=Homo sapiens OX=9606 GN=HSPG2 PE=1 SV=4	Color2 [DarkGray]	1	4		18.9515	19.31	19.8794	19.0397	21.1755	19.6241
	0.134763	0.24784	K.GVN[+1647.613]VTMPAQPGTPPLSSTQLQIDPSLHEFQLVDLSR.R	HexNAc(5)Hex(3)Fuc(1)	N[+1648]	>sp|P98160|PGBM_HUMAN Basement membrane-specific heparan sulfate proteoglycan core protein OS=Homo sapiens OX=9606 GN=HSPG2 PE=1 SV=4	Color2 [DarkGray]	1	4		19.3343	20.0513	18.7498	18.1191	19.2041	20.0686
	0.143187	-0.571105	K.GVN[+1768.640]VTMPAQPGTPPLSSTQLQIDPSLHEFQLVDLSR.R	HexNAc(4)Hex(5)Fuc(1)	N[+1769]	>sp|P98160|PGBM_HUMAN Basement membrane-specific heparan sulfate proteoglycan core protein OS=Homo sapiens OX=9606 GN=HSPG2 PE=1 SV=4	Color2 [DarkGray]	1	4		20.8975	21.1549	21.3299	19.2085	24.3107	21.5765
	0.660937	-2.00258	K.GVN[+1809.666]VTMPAQPGTPPLSSTQLQIDPSLHEFQLVDLSR.R	HexNAc(5)Hex(4)Fuc(1)	N[+1810]	>sp|P98160|PGBM_HUMAN Basement membrane-specific heparan sulfate proteoglycan core protein OS=Homo sapiens OX=9606 GN=HSPG2 PE=1 SV=4	Color2 [DarkGray]	1	4		19.1737	18.0362	20.1992	19.121	23.3422	20.9536
	0.623505	-0.68866	K.GVN[+2059.735]VTM[+15.995]PAQPGTPPLSSTQLQIDPSLHEFQLVDLSR.R	HexNAc(4)Hex(5)Fuc(1)NeuAc(1)	M[+16], N[+2060]	>sp|P98160|PGBM_HUMAN Basement membrane-specific heparan sulfate proteoglycan core protein OS=Homo sapiens OX=9606 GN=HSPG2 PE=1 SV=4	Color2 [DarkGray]	1	4		21.4282	20.0835	20.6617	21.19	22.0228	21.0266
	0.0646268	0.396322	K.GVN[+2059.735]VTMPAQPGTPPLSSTQLQIDPSLHEFQLVDLSR.R	HexNAc(4)Hex(5)Fuc(1)NeuAc(1)	N[+2060]	>sp|P98160|PGBM_HUMAN Basement membrane-specific heparan sulfate proteoglycan core protein OS=Homo sapiens OX=9606 GN=HSPG2 PE=1 SV=4	Color2 [DarkGray]	1	4		24.4529	23.167	22.8316	19.5815	26.7683	22.9127
	0.0480039	0.151079	K.GVN[+2100.761]VTMPAQPGTPPLSSTQLQIDPSLHEFQLVDLSR.R	HexNAc(5)Hex(4)Fuc(1)NeuAc(1)	N[+2101]	>sp|P98160|PGBM_HUMAN Basement membrane-specific heparan sulfate proteoglycan core protein OS=Homo sapiens OX=9606 GN=HSPG2 PE=1 SV=4	Color2 [DarkGray]	1	4		21.4804	20.3622	22.3539	20.5443	23.0558	20.1431
	0.663361	-0.539571	K.GVN[+2262.814]VTMPAQPGTPPLSSTQLQIDPSLHEFQLVDLSR.R	HexNAc(5)Hex(5)Fuc(1)NeuAc(1)	N[+2263]	>sp|P98160|PGBM_HUMAN Basement membrane-specific heparan sulfate proteoglycan core protein OS=Homo sapiens OX=9606 GN=HSPG2 PE=1 SV=4	Color2 [DarkGray]	1	4		18.7266	19.873	19.1313	20.0743	19.7152	19.5601
	0.585339	2.65991	K.GVN[+2350.830]VTMPAQPGTPPLSSTQLQIDPSLHEFQLVDLSR.R	HexNAc(4)Hex(5)Fuc(1)NeuAc(2)	N[+2351]	>sp|P98160|PGBM_HUMAN Basement membrane-specific heparan sulfate proteoglycan core protein OS=Homo sapiens OX=9606 GN=HSPG2 PE=1 SV=4	Color2 [DarkGray]	1	4		23.52	22.41	25.2326	18.1065	24.4789	20.5975
	1.50905	-3.39498	K.GVPQVLIVITDGESHDADKLN[+1622.582]ATAK.A	HexNAc(4)Hex(5)	N[+1623]	>sp|A6NMZ7|CO6A6_HUMAN Collagen alpha-6(VI) chain OS=Homo sapiens OX=9606 GN=COL6A6 PE=1 SV=2	Color2 [DarkGray]	1	4		18.7618	20.1327	19.5184	22.607	21.3449	24.6459
+	3.94372	-10.3773	K.GVPQVLIVITDGESHDADKLN[+1768.640]ATAK.A	HexNAc(4)Hex(5)Fuc(1)	N[+1769]	>sp|A6NMZ7|CO6A6_HUMAN Collagen alpha-6(VI) chain OS=Homo sapiens OX=9606 GN=COL6A6 PE=1 SV=2	Color2 [DarkGray]	1	4		18.4081	20.5261	19.6461	29.369	30.4562	29.887
+	3.23879	-6.93944	K.GVPQVLIVITDGESHDADKLN[+2059.735]ATAK.A	HexNAc(4)Hex(5)Fuc(1)NeuAc(1)	N[+2060]	>sp|A6NMZ7|CO6A6_HUMAN Collagen alpha-6(VI) chain OS=Homo sapiens OX=9606 GN=COL6A6 PE=1 SV=2	Color2 [DarkGray]	1	4		19.2463	19.2341	21.0868	26.134	27.134	27.1175
	0.0361705	-0.106403	K.GVVTDEQGIPIAN[+1419.502]ATISVSGINHGVK.T	HexNAc(3)Hex(5)	N[+1420]	>sp|Q8IUX7|AEBP1_HUMAN Adipocyte enhancer-binding protein 1 OS=Homo sapiens OX=9606 GN=AEBP1 PE=1 SV=1	Color2 [DarkGray]	1	4		20.8898	17.9902	20.126	19.5564	20.7109	19.058
	0.767954	-2.10949	K.GVVTDEQGIPIAN[+1622.582]ATISVSGINHGVK.T	HexNAc(4)Hex(5)	N[+1623]	>sp|Q8IUX7|AEBP1_HUMAN Adipocyte enhancer-binding protein 1 OS=Homo sapiens OX=9606 GN=AEBP1 PE=1 SV=1	Color2 [DarkGray]	1	4		18.8819	19.2945	19.5488	19.706	23.8031	20.5446
	1.14765	2.95979	K.GVVTDEQGIPIAN[+1710.598]ATISVSGINHGVK.T	HexNAc(3)Hex(5)NeuAc(1)	N[+1711]	>sp|Q8IUX7|AEBP1_HUMAN Adipocyte enhancer-binding protein 1 OS=Homo sapiens OX=9606 GN=AEBP1 PE=1 SV=1	Color2 [DarkGray]	1	4		21.0011	23.1241	24.5662	19.3565	21.1993	19.2564
	0.843622	2.51074	K.GVVTDEQGIPIAN[+1864.634]ATISVSGINHGVK.T	HexNAc(2)Hex(9)	N[+1865]	>sp|Q8IUX7|AEBP1_HUMAN Adipocyte enhancer-binding protein 1 OS=Homo sapiens OX=9606 GN=AEBP1 PE=1 SV=1	Color2 [DarkGray]	1	4		23.4596	23.6058	21.9992	18.8059	23.0239	19.7025
	0.199942	-0.662533	K.GVVTDEQGIPIAN[+1866.688]ATISVSGINHGVK.T	HexNAc(6)Hex(4)	N[+1867]	>sp|Q8IUX7|AEBP1_HUMAN Adipocyte enhancer-binding protein 1 OS=Homo sapiens OX=9606 GN=AEBP1 PE=1 SV=1	Color2 [DarkGray]	1	4		19.2304	19.1116	20.7813	19.3685	19.0644	22.6781
	0.0502466	-0.236537	K.GVVTDEQGIPIAN[+1913.677]ATISVSGINHGVK.T	HexNAc(4)Hex(5)NeuAc(1)	N[+1914]	>sp|Q8IUX7|AEBP1_HUMAN Adipocyte enhancer-binding protein 1 OS=Homo sapiens OX=9606 GN=AEBP1 PE=1 SV=1	Color2 [DarkGray]	1	4		20.87	19.6523	22.9396	19.356	23.8124	21.0031
	1.06258	-2.3023	K.GVVTDEQGIPIAN[+2676.952]ATISVSGINHGVK.T	HexNAc(6)Hex(9)	N[+2677]	>sp|Q8IUX7|AEBP1_HUMAN Adipocyte enhancer-binding protein 1 OS=Homo sapiens OX=9606 GN=AEBP1 PE=1 SV=1	Color2 [DarkGray]	1	4		20.3552	19.3524	19.652	20.1623	22.8031	23.301
	0.114073	-0.158101	K.GWLTHNC[+57.021]GHHEDAGVIC[+57.021]SATQIN[+1702.581]STTTDWWHPTTTTTAR.P	HexNAc(2)Hex(8)	C[+57]*2, N[+1703]	>sp|Q9UGM3|DMBT1_HUMAN Deleted in malignant brain tumors 1 protein OS=Homo sapiens OX=9606 GN=DMBT1 PE=1 SV=2	Color2 [DarkGray]	1	4		18.9859	19.0613	19.8221	19.927	19.819	18.5976
	1.91194	1.1115	K.GYFYIPPLATHTIC[+57.021]DRN[+2141.788]HTWLPVSDDAC[+57.021]YR.E	HexNAc(6)Hex(3)Fuc(1)NeuAc(1)	C[+57]*2, N[+2142]	>sp|P15529|MCP_HUMAN Membrane cofactor protein OS=Homo sapiens OX=9606 GN=CD46 PE=1 SV=3	Color2 [DarkGray]	1	4		21.8348	22.2907	22.1724	21.2457	20.5575	21.1603
	0.313283	0.95308	K.GYFYIPPLATHTIC[+57.021]DRN[+2350.830]HTWLPVSDDAC[+57.021]YR.E	HexNAc(4)Hex(5)Fuc(1)NeuAc(2)	C[+57]*2, N[+2351]	>sp|P15529|MCP_HUMAN Membrane cofactor protein OS=Homo sapiens OX=9606 GN=CD46 PE=1 SV=3	Color2 [DarkGray]	1	4		18.8518	19.5203	21.7652	20.384	17.4184	19.4757
	0.251892	0.785624	K.GYFYIPPLATHTIC[+57.021]DRN[+2391.857]HTWLPVSDDAC[+57.021]YR.E	HexNAc(5)Hex(4)Fuc(1)NeuAc(2)	C[+57]*2, N[+2392]	>sp|P15529|MCP_HUMAN Membrane cofactor protein OS=Homo sapiens OX=9606 GN=CD46 PE=1 SV=3	Color2 [DarkGray]	1	4		17.9108	21.7939	20.7631	19.5191	18.569	20.0227
	0.743008	0.984569	K.GYFYIPPLATHTIC[+57.021]DRN[+2553.910]HTWLPVSDDAC[+57.021]YR.E	HexNAc(5)Hex(5)Fuc(1)NeuAc(2)	C[+57]*2, N[+2554]	>sp|P15529|MCP_HUMAN Membrane cofactor protein OS=Homo sapiens OX=9606 GN=CD46 PE=1 SV=3	Color2 [DarkGray]	1	4		19.487	19.6943	21.3773	19.3526	19.2578	18.9947
	1.02716	4.20648	K.HAN[+2204.772]WTLTPLK.S	HexNAc(4)Hex(5)NeuAc(2)	N[+2205]	>sp|P27169|PON1_HUMAN Serum paraoxonase/arylesterase 1 OS=Homo sapiens OX=9606 GN=PON1 PE=1 SV=3	Color2 [DarkGray]	1	4		23.6049	26.2995	23.9562	23.693	17.8356	19.7125
	0.41785	-1.03766	K.HFFN[+1622.582]VSDELALVTIVK.T	HexNAc(4)Hex(5)	N[+1623]	>sp|P56199|ITA1_HUMAN Integrin alpha-1 OS=Homo sapiens OX=9606 GN=ITGA1 PE=1 SV=2	Color2 [DarkGray]	1	4		18.9045	18.999	19.6045	18.5603	22.1155	19.9451
	0.194438	-1.00955	K.HFFN[+1913.677]VSDELALVTIVK.T	HexNAc(4)Hex(5)NeuAc(1)	N[+1914]	>sp|P56199|ITA1_HUMAN Integrin alpha-1 OS=Homo sapiens OX=9606 GN=ITGA1 PE=1 SV=2	Color2 [DarkGray]	1	4		19.0399	19.0277	19.3416	19.539	23.8562	17.0426
	0.469678	-1.04649	K.HFFN[+1987.714]VSDELALVTIVK.T	HexNAc(5)Hex(6)	N[+1988]	>sp|P56199|ITA1_HUMAN Integrin alpha-1 OS=Homo sapiens OX=9606 GN=ITGA1 PE=1 SV=2	Color2 [DarkGray]	1	4		19.0374	20.9306	19.1829	19.3935	21.9732	20.9236
	0.650334	-1.35853	K.HFFN[+2059.735]VSDELALVTIVK.T	HexNAc(4)Hex(5)Fuc(1)NeuAc(1)	N[+2060]	>sp|P56199|ITA1_HUMAN Integrin alpha-1 OS=Homo sapiens OX=9606 GN=ITGA1 PE=1 SV=2	Color2 [DarkGray]	1	4		18.9094	19.1241	19.1267	19.0292	22.2107	19.9958
	1.11181	-1.76257	K.HFFN[+2204.772]VSDELALVTIVK.T	HexNAc(4)Hex(5)NeuAc(2)	N[+2205]	>sp|P56199|ITA1_HUMAN Integrin alpha-1 OS=Homo sapiens OX=9606 GN=ITGA1 PE=1 SV=2	Color2 [DarkGray]	1	4		20.0012	19.1339	18.9232	19.8144	22.0333	21.4983
	0.267301	0.56768	K.HFKN[+2188.740]C[+57.021]TSISGDLHILPVAFR.G	HexNAc(2)Hex(11)	C[+57], N[+2189]	>sp|P00533|EGFR_HUMAN Epidermal growth factor receptor OS=Homo sapiens OX=9606 GN=EGFR PE=1 SV=2	Color2 [DarkGray]	1	4		19.422	21.6231	18.9378	19.0622	19.4864	19.7312
	0.110104	0.540059	K.HFKN[+2272.846]C[+57.021]TSISGDLHILPVAFR.G	HexNAc(8)Hex(4)	C[+57], N[+2273]	>sp|P00533|EGFR_HUMAN Epidermal growth factor receptor OS=Homo sapiens OX=9606 GN=EGFR PE=1 SV=2	Color2 [DarkGray]	1	4		18.1365	23.6702	18.7108	19.3836	20.136	19.3777
	0.00739481	-0.0208848	K.HHDYYITSTSN[+2350.830]GSLEGLENR.E	HexNAc(4)Hex(5)Fuc(1)NeuAc(2)	N[+2351]	>sp|P98172|EFNB1_HUMAN Ephrin-B1 OS=Homo sapiens OX=9606 GN=EFNB1 PE=1 SV=1	Color2 [DarkGray]	1	4		19.0823	19.3474	20.3411	21.1911	18.3024	19.34
	0.347717	-1.04498	K.HIPGLIHN[+2059.735]MTAR.C	HexNAc(4)Hex(5)Fuc(1)NeuAc(1)	N[+2060]	>sp|Q16610|ECM1_HUMAN Extracellular matrix protein 1 OS=Homo sapiens OX=9606 GN=ECM1 PE=1 SV=2	Color2 [DarkGray]	1	4		20.3296	19.2533	19.4083	22.7921	20.7005	18.6337
	0.651494	-2.63359	K.HIPGLIHN[+2350.830]MTAR.C	HexNAc(4)Hex(5)Fuc(1)NeuAc(2)	N[+2351]	>sp|Q16610|ECM1_HUMAN Extracellular matrix protein 1 OS=Homo sapiens OX=9606 GN=ECM1 PE=1 SV=2	Color2 [DarkGray]	1	4		19.6575	19.1318	18.9485	25.5067	20.2146	19.9173
	1.04211	2.14127	K.HLLEN[+1378.476]STASVSEAER.K	HexNAc(2)Hex(6)	N[+1378]	>sp|P42892|ECE1_HUMAN Endothelin-converting enzyme 1 OS=Homo sapiens OX=9606 GN=ECE1 PE=1 SV=2	Color2 [DarkGray]	1	4		19.823	21.6311	23.0579	19.4608	19.7127	18.9146
	0.309431	1.22454	K.HLLEN[+1540.529]STASVSEAER.K	HexNAc(2)Hex(7)	N[+1541]	>sp|P42892|ECE1_HUMAN Endothelin-converting enzyme 1 OS=Homo sapiens OX=9606 GN=ECE1 PE=1 SV=2	Color2 [DarkGray]	1	4		23.9014	19.5037	19.1704	19.6549	18.7027	20.5442
	0.0118379	-0.037344	K.HLLEN[+1768.640]STASVSEAER.K	HexNAc(4)Hex(5)Fuc(1)	N[+1769]	>sp|P42892|ECE1_HUMAN Endothelin-converting enzyme 1 OS=Homo sapiens OX=9606 GN=ECE1 PE=1 SV=2	Color2 [DarkGray]	1	4		19.2673	19.8364	19.92	18.5456	18.8437	21.7465
	0.161448	0.76721	K.HLLEN[+2059.735]STASVSEAER.K	HexNAc(4)Hex(5)Fuc(1)NeuAc(1)	N[+2060]	>sp|P42892|ECE1_HUMAN Endothelin-converting enzyme 1 OS=Homo sapiens OX=9606 GN=ECE1 PE=1 SV=2	Color2 [DarkGray]	1	4		19.2985	23.106	17.1182	19.3093	18.3758	19.5359
	1.79674	-3.17987	K.HLN[+1216.423]GTITAK.Y	HexNAc(2)Hex(5)	N[+1216]	>sp|Q6YHK3|CD109_HUMAN CD109 antigen OS=Homo sapiens OX=9606 GN=CD109 PE=1 SV=2	Color2 [DarkGray]	1	4		20.4169	18.8836	20.7534	24.2849	22.7236	22.585
+	5.71774	-6.81134	K.HLN[+1378.476]GTITAK.Y	HexNAc(2)Hex(6)	N[+1378]	>sp|Q6YHK3|CD109_HUMAN CD109 antigen OS=Homo sapiens OX=9606 GN=CD109 PE=1 SV=2	Color2 [DarkGray]	1	4		19.1781	19.1342	18.7738	25.8353	26.0144	25.6705
	0.876235	-3.08543	K.HLN[+1540.529]ASNPTEPATIIFTAAR.E	HexNAc(2)Hex(7)	N[+1541]	>sp|Q8NFQ8|TOIP2_HUMAN Torsin-1A-interacting protein 2 OS=Homo sapiens OX=9606 GN=TOR1AIP2 PE=1 SV=1	Color2 [DarkGray]	1	4		23.2779	17.9537	22.2241	24.6132	24.1405	23.9582
+	4.05733	-7.64085	K.HLN[+1540.529]GTITAK.Y	HexNAc(2)Hex(7)	N[+1541]	>sp|Q6YHK3|CD109_HUMAN CD109 antigen OS=Homo sapiens OX=9606 GN=CD109 PE=1 SV=2	Color2 [DarkGray]	1	4		19.2475	19.2372	18.1745	26.9532	25.912	26.7166
	0.0252852	-0.102149	K.HLN[+1581.555]GTITAK.Y	HexNAc(3)Hex(6)	N[+1582]	>sp|Q6YHK3|CD109_HUMAN CD109 antigen OS=Homo sapiens OX=9606 GN=CD109 PE=1 SV=2	Color2 [DarkGray]	1	4		21.0332	20.8744	17.7738	19.6836	21.5809	18.7235
	0.0363447	0.0876471	K.HLN[+1702.581]ASNPTEPATIIFTAAR.E	HexNAc(2)Hex(8)	N[+1703]	>sp|Q8NFQ8|TOIP2_HUMAN Torsin-1A-interacting protein 2 OS=Homo sapiens OX=9606 GN=TOR1AIP2 PE=1 SV=1	Color2 [DarkGray]	1	4		25.1844	25.9388	25.6681	26.7632	24.0599	25.7053
	1.17933	-3.57894	K.HLN[+1702.581]GTITAK.Y	HexNAc(2)Hex(8)	N[+1703]	>sp|Q6YHK3|CD109_HUMAN CD109 antigen OS=Homo sapiens OX=9606 GN=CD109 PE=1 SV=2	Color2 [DarkGray]	1	4		19.304	17.1553	18.6521	24.4474	21.1624	20.2384
	0.50511	1.57447	K.HLVVGRN[+1864.634]STGYR.L	HexNAc(2)Hex(9)	N[+1865]	>sp|O60513|B4GT4_HUMAN Beta-1,4-galactosyltransferase 4 OS=Homo sapiens OX=9606 GN=B4GALT4 PE=1 SV=1	Color2 [DarkGray]	1	4		22.7955	18.7942	18.6645	18.5339	18.7487	18.2483
	1.54694	-2.5741	K.HMLALAPN[+2059.735]STAR.R	HexNAc(4)Hex(5)Fuc(1)NeuAc(1)	N[+2060]	>sp|Q92508|PIEZ1_HUMAN Piezo-type mechanosensitive ion channel component 1 OS=Homo sapiens OX=9606 GN=PIEZO1 PE=1 SV=4	Color2 [DarkGray]	1	4		17.5043	19.798	18.801	21.6124	21.7032	20.51
	1.58935	4.39674	K.HMSLALN[+1540.529]R.T	HexNAc(2)Hex(7)	N[+1541]	>sp|P06280|AGAL_HUMAN Alpha-galactosidase A OS=Homo sapiens OX=9606 GN=GLA PE=1 SV=1	Color2 [DarkGray]	1	4		24.8943	21.8213	25.3226	18.4569	19.7713	20.6199
	0.83119	4.08843	K.HN[+2204.772]FSHC[+57.021]C[+57.021]SK.V	HexNAc(4)Hex(5)NeuAc(2)	C[+57]*2, N[+2205]	>sp|P43652|AFAM_HUMAN Afamin OS=Homo sapiens OX=9606 GN=AFM PE=1 SV=1	Color2 [DarkGray]	1	4		24.0213	26.8404	19.1835	19.3508	19.9906	18.4385
	0.426389	-0.423306	K.HNIIPIFAVTN[+2059.735]YSYSYYEK.L	HexNAc(4)Hex(5)Fuc(1)NeuAc(1)	N[+2060]	>sp|P16144|ITB4_HUMAN Integrin beta-4 OS=Homo sapiens OX=9606 GN=ITGB4 PE=1 SV=5	Color2 [DarkGray]	1	4		18.5086	18.8915	19.8118	19.814	19.2157	19.4522
	1.63121	2.9115	K.HNN[+1038.375]DTQHIWESDSNEFSVIADPR.G	HexNAc(2)Hex(3)Fuc(1)	N[+1038]	>sp|P14625|ENPL_HUMAN Endoplasmin OS=Homo sapiens OX=9606 GN=HSP90B1 PE=1 SV=1	Color2 [DarkGray]	1	4		24.079	25.4417	26.2098	22.8844	22.8318	21.2799
+	2.75562	4.37048	K.HNN[+1054.370]DTQHIWESDSNEFSVIADPR.G	HexNAc(2)Hex(4)	N[+1054]	>sp|P14625|ENPL_HUMAN Endoplasmin OS=Homo sapiens OX=9606 GN=HSP90B1 PE=1 SV=1	Color2 [DarkGray]	1	4		24.8725	23.6608	23.1455	18.9587	19.9258	19.6829
	0.935671	0.729918	K.HNN[+1095.397]DTQHIWESDSNEFSVIADPR.G	HexNAc(3)Hex(3)	N[+1095]	>sp|P14625|ENPL_HUMAN Endoplasmin OS=Homo sapiens OX=9606 GN=HSP90B1 PE=1 SV=1	Color2 [DarkGray]	1	4		20.2101	20.2254	20.4369	19.6844	18.8896	20.1088
	1.31529	2.25798	K.HNN[+1200.428]DTQHIWESDSNEFSVIADPR.G	HexNAc(2)Hex(4)Fuc(1)	N[+1200]	>sp|P14625|ENPL_HUMAN Endoplasmin OS=Homo sapiens OX=9606 GN=HSP90B1 PE=1 SV=1	Color2 [DarkGray]	1	4		20.0445	21.5777	22.061	19.1254	19.7933	17.9906
+	3.4149	3.47332	K.HNN[+1216.423]DTQHIWESDSNEFSVIADPR.G	HexNAc(2)Hex(5)	N[+1216]	>sp|P14625|ENPL_HUMAN Endoplasmin OS=Homo sapiens OX=9606 GN=HSP90B1 PE=1 SV=1	Color2 [DarkGray]	1	4		31.6673	30.881	31.5426	28.0869	28.0922	27.4917
+	3.32447	7.09412	K.HNN[+1241.454]DTQHIWESDSNEFSVIADPR.G	HexNAc(3)Hex(3)Fuc(1)	N[+1241]	>sp|P14625|ENPL_HUMAN Endoplasmin OS=Homo sapiens OX=9606 GN=HSP90B1 PE=1 SV=1	Color2 [DarkGray]	1	4		26.9912	26.7402	26.2028	20.801	18.7071	19.1438
	0.133614	0.118876	K.HNN[+1257.449]DTQHIWESDSNEFSVIADPR.G	HexNAc(3)Hex(4)	N[+1257]	>sp|P14625|ENPL_HUMAN Endoplasmin OS=Homo sapiens OX=9606 GN=HSP90B1 PE=1 SV=1	Color2 [DarkGray]	1	4		20.2203	19.2828	19.6451	19.855	19.6893	19.2473
	1.96649	3.64747	K.HNN[+1362.481]DTQHIWESDSNEFSVIADPR.G	HexNAc(2)Hex(5)Fuc(1)	N[+1362]	>sp|P14625|ENPL_HUMAN Endoplasmin OS=Homo sapiens OX=9606 GN=HSP90B1 PE=1 SV=1	Color2 [DarkGray]	1	4		22.8686	23.7229	21.0692	18.8541	19.2952	18.569
+	3.20149	3.89	K.HNN[+1378.476]DTQHIWESDSNEFSVIADPR.G	HexNAc(2)Hex(6)	N[+1378]	>sp|P14625|ENPL_HUMAN Endoplasmin OS=Homo sapiens OX=9606 GN=HSP90B1 PE=1 SV=1	Color2 [DarkGray]	1	4		31.4704	31.0082	31.4185	27.4264	26.7547	28.0459
	1.15983	1.81097	K.HNN[+1403.507]DTQHIWESDSNEFSVIADPR.G	HexNAc(3)Hex(4)Fuc(1)	N[+1404]	>sp|P14625|ENPL_HUMAN Endoplasmin OS=Homo sapiens OX=9606 GN=HSP90B1 PE=1 SV=1	Color2 [DarkGray]	1	4		21.6321	21.8592	19.6648	19.4122	18.7824	19.5285
	0.568247	0.929926	K.HNN[+1419.502]DTQHIWESDSNEFSVIADPR.G	HexNAc(3)Hex(5)	N[+1420]	>sp|P14625|ENPL_HUMAN Endoplasmin OS=Homo sapiens OX=9606 GN=HSP90B1 PE=1 SV=1	Color2 [DarkGray]	1	4		21.3662	19.032	19.5109	18.7578	19.2686	19.0929
+	3.97821	8.16454	K.HNN[+1444.534]DTQHIWESDSNEFSVIADPR.G	HexNAc(4)Hex(3)Fuc(1)	N[+1445]	>sp|P14625|ENPL_HUMAN Endoplasmin OS=Homo sapiens OX=9606 GN=HSP90B1 PE=1 SV=1	Color2 [DarkGray]	1	4		27.5732	27.5904	27.5614	18.7424	20.4614	19.0275
+	2.65123	7.44021	K.HNN[+1540.529]DTQHIWESDSNEFSVIADPR.G	HexNAc(2)Hex(7)	N[+1541]	>sp|P14625|ENPL_HUMAN Endoplasmin OS=Homo sapiens OX=9606 GN=HSP90B1 PE=1 SV=1	Color2 [DarkGray]	1	4		30.2464	30.4014	30.1232	24.4723	20.8283	23.1498
+	3.63959	5.61163	K.HNN[+1702.581]DTQHIWESDSNEFSVIADPR.G	HexNAc(2)Hex(8)	N[+1703]	>sp|P14625|ENPL_HUMAN Endoplasmin OS=Homo sapiens OX=9606 GN=HSP90B1 PE=1 SV=1	Color2 [DarkGray]	1	4		29.7128	30.4161	30.6297	25.1465	24.8065	23.9707
	0.443306	-1.36868	K.HNN[+1704.635]DTQHIWESDSNEFSVIADPR.G	HexNAc(6)Hex(3)	N[+1705]	>sp|P14625|ENPL_HUMAN Endoplasmin OS=Homo sapiens OX=9606 GN=HSP90B1 PE=1 SV=1	Color2 [DarkGray]	1	4		19.4869	19.182	20.0489	23.507	19.278	20.0389
	0.531836	1.25722	K.HNN[+1710.598]DTQHIWESDSNEFSVIADPR.G	HexNAc(3)Hex(5)NeuAc(1)	N[+1711]	>sp|P14625|ENPL_HUMAN Endoplasmin OS=Homo sapiens OX=9606 GN=HSP90B1 PE=1 SV=1	Color2 [DarkGray]	1	4		20.5178	19.7003	20.7728	19.9251	17.0993	20.1948
	1.33328	3.93793	K.HNN[+1864.634]DTQHIWESDSNEFSVIADPR.G	HexNAc(2)Hex(9)	N[+1865]	>sp|P14625|ENPL_HUMAN Endoplasmin OS=Homo sapiens OX=9606 GN=HSP90B1 PE=1 SV=1	Color2 [DarkGray]	1	4		25.241	24.7476	24.5261	18.7156	20.5728	23.4125
	0.313571	-0.153024	K.HNN[+892.317]DTQHIWESDSNEFSVIADPR.G	HexNAc(2)Hex(3)	N[+892]	>sp|P14625|ENPL_HUMAN Endoplasmin OS=Homo sapiens OX=9606 GN=HSP90B1 PE=1 SV=1	Color2 [DarkGray]	1	4		19.1423	19.5053	18.9707	19.3658	19.1441	19.5675
	1.23295	2.18087	K.HPC[+57.021]N[+2059.735]ITEEDYQPLMK.L	HexNAc(4)Hex(5)Fuc(1)NeuAc(1)	C[+57], N[+2060]	>sp|P28907|CD38_HUMAN ADP-ribosyl cyclase/cyclic ADP-ribose hydrolase 1 OS=Homo sapiens OX=9606 GN=CD38 PE=1 SV=2	Color2 [DarkGray]	1	4		21.5332	21.94	19.8725	17.9367	19.0804	19.7859
	0.491407	1.27043	K.HPC[+57.021]N[+2100.761]ITEEDYQPLMK.L	HexNAc(5)Hex(4)Fuc(1)NeuAc(1)	C[+57], N[+2101]	>sp|P28907|CD38_HUMAN ADP-ribosyl cyclase/cyclic ADP-ribose hydrolase 1 OS=Homo sapiens OX=9606 GN=CD38 PE=1 SV=2	Color2 [DarkGray]	1	4		19.3559	23.0137	20.3192	19.8312	19.9496	19.0966
+	3.01833	8.00083	K.HPC[+57.021]N[+2350.830]ITEEDYQPLMK.L	HexNAc(4)Hex(5)Fuc(1)NeuAc(2)	C[+57], N[+2351]	>sp|P28907|CD38_HUMAN ADP-ribosyl cyclase/cyclic ADP-ribose hydrolase 1 OS=Homo sapiens OX=9606 GN=CD38 PE=1 SV=2	Color2 [DarkGray]	1	4		27.5014	27.9867	27.2982	17.8036	20.4344	20.5457
	0.576716	1.77165	K.HPC[+57.021]N[+2553.910]ITEEDYQPLMK.L	HexNAc(5)Hex(5)Fuc(1)NeuAc(2)	C[+57], N[+2554]	>sp|P28907|CD38_HUMAN ADP-ribosyl cyclase/cyclic ADP-ribose hydrolase 1 OS=Homo sapiens OX=9606 GN=CD38 PE=1 SV=2	Color2 [DarkGray]	1	4		23.0242	19.2736	23.0712	19.9565	20.9783	19.1193
	1.61624	-4.13196	K.HRRTQTHLN[+1768.640]NSR.L	HexNAc(4)Hex(5)Fuc(1)	N[+1769]	>sp|Q5JPB2|ZN831_HUMAN Zinc finger protein 831 OS=Homo sapiens OX=9606 GN=ZNF831 PE=2 SV=4	Color2 [DarkGray]	1	4		19.6589	18.3891	18.8775	21.1807	25.026	23.1148
+	4.87507	-6.41138	K.HRRTQTHLN[+2059.735]NSR.L	HexNAc(4)Hex(5)Fuc(1)NeuAc(1)	N[+2060]	>sp|Q5JPB2|ZN831_HUMAN Zinc finger protein 831 OS=Homo sapiens OX=9606 GN=ZNF831 PE=2 SV=4	Color2 [DarkGray]	1	4		19.2204	18.412	19.0137	25.2168	25.2686	25.3949
	0.334653	-1.23213	K.HRRTQTHLN[+2424.867]NSR.L	HexNAc(5)Hex(6)Fuc(1)NeuAc(1)	N[+2425]	>sp|Q5JPB2|ZN831_HUMAN Zinc finger protein 831 OS=Homo sapiens OX=9606 GN=ZNF831 PE=2 SV=4	Color2 [DarkGray]	1	4		19.6724	19.8754	19.2076	23.8255	19.4419	19.1844
+	2.85862	5.01727	K.HSHFIWN[+1913.677]R.T	HexNAc(4)Hex(5)NeuAc(1)	N[+1914]	>sp|P05186|PPBT_HUMAN Alkaline phosphatase, tissue-nonspecific isozyme OS=Homo sapiens OX=9606 GN=ALPL PE=1 SV=4	Color2 [DarkGray]	1	4		23.3979	24.0334	25.1601	19.6935	18.4605	19.3855
	0.715608	2.02495	K.HSHFIWN[+2204.772]R.T	HexNAc(4)Hex(5)NeuAc(2)	N[+2205]	>sp|P05186|PPBT_HUMAN Alkaline phosphatase, tissue-nonspecific isozyme OS=Homo sapiens OX=9606 GN=ALPL PE=1 SV=4	Color2 [DarkGray]	1	4		19.4572	22.5577	23.6348	20.1044	19.217	20.2535
	0.453176	1.05894	K.HSN[+1864.634]C[+57.021]THQQDAGVTC[+57.021]SDGSNLEMR.L	HexNAc(2)Hex(9)	C[+57]*2, N[+1865]	>sp|Q86VB7|C163A_HUMAN Scavenger receptor cysteine-rich type 1 protein M130 OS=Homo sapiens OX=9606 GN=CD163 PE=1 SV=2	Color2 [DarkGray]	1	4		19.9061	23.1051	20.4906	20.1527	19.7154	20.4568
	0.327922	1.12402	K.HSN[+2424.867]C[+57.021]THQQDAGVTC[+57.021]SDGSNLEMR.L	HexNAc(5)Hex(6)Fuc(1)NeuAc(1)	C[+57]*2, N[+2425]	>sp|Q86VB7|C163A_HUMAN Scavenger receptor cysteine-rich type 1 protein M130 OS=Homo sapiens OX=9606 GN=CD163 PE=1 SV=2	Color2 [DarkGray]	1	4		18.3299	22.8717	19.1249	19.293	18.7335	18.928
	0.263631	0.770566	K.HSN[+2715.963]C[+57.021]THQQDAGVTC[+57.021]SDGSNLEMR.L	HexNAc(5)Hex(6)Fuc(1)NeuAc(2)	C[+57]*2, N[+2716]	>sp|Q86VB7|C163A_HUMAN Scavenger receptor cysteine-rich type 1 protein M130 OS=Homo sapiens OX=9606 GN=CD163 PE=1 SV=2	Color2 [DarkGray]	1	4		19.3636	22.5153	18.9454	20.1063	19.2353	19.1709
	0.599422	1.05474	K.HSVLWNAMIHPLC[+57.021]N[+1702.581]MTLK.G	HexNAc(2)Hex(8)	C[+57], N[+1703]	>sp|Q9HAT2|SIAE_HUMAN Sialate O-acetylesterase OS=Homo sapiens OX=9606 GN=SIAE PE=1 SV=1	Color2 [DarkGray]	1	4		18.7493	19.7437	20.8985	19.3793	17.7919	19.0562
+	4.94823	-7.02993	K.HTAEYAAN[+1622.582]ITK.S	HexNAc(4)Hex(5)	N[+1623]	>sp|Q07075|AMPE_HUMAN Glutamyl aminopeptidase OS=Homo sapiens OX=9606 GN=ENPEP PE=1 SV=3	Color2 [DarkGray]	1	4		19.0512	19.2572	18.4191	25.9377	26.0554	25.8241
+	3.91752	-5.95814	K.HTAEYAAN[+1913.677]ITK.S	HexNAc(4)Hex(5)NeuAc(1)	N[+1914]	>sp|Q07075|AMPE_HUMAN Glutamyl aminopeptidase OS=Homo sapiens OX=9606 GN=ENPEP PE=1 SV=3	Color2 [DarkGray]	1	4		19.4848	18.7063	19.0483	24.3889	25.4934	25.2315
	1.07365	-3.83352	K.HTAEYAAN[+2204.772]ITK.S	HexNAc(4)Hex(5)NeuAc(2)	N[+2205]	>sp|Q07075|AMPE_HUMAN Glutamyl aminopeptidase OS=Homo sapiens OX=9606 GN=ENPEP PE=1 SV=3	Color2 [DarkGray]	1	4		19.5624	18.4635	17.9888	23.9242	24.3033	19.2879
	0.488071	1.04796	K.HTGPGILSMANAGPNTN[+1864.634]GSQFFIC[+57.021]TAK.T	HexNAc(2)Hex(9)	C[+57], N[+1865]	>sp|P62937|PPIA_HUMAN Peptidyl-prolyl cis-trans isomerase A OS=Homo sapiens OX=9606 GN=PPIA PE=1 SV=2	Color2 [DarkGray]	1	4		22.1202	19.0761	20.1185	19.5831	19.7419	18.846
	0.390525	1.4019	K.HTGSGILSMANAGPNTN[+1872.651]GSQFFIC[+57.021]TAK.T	HexNAc(3)Hex(6)NeuAc(1)	C[+57], N[+1873]	>sp|A0A0B4J2A2|PAL4C_HUMAN Peptidyl-prolyl cis-trans isomerase A-like 4C OS=Homo sapiens OX=9606 GN=PPIAL4C PE=2 SV=1	Color2 [DarkGray]	1	4		23.8251	20.3044	18.7888	19.0973	19.6263	19.989
	0.964602	-3.13115	K.HTNM[+15.995]N[+1702.581]LTQLK.V	HexNAc(2)Hex(8)	M[+16], N[+1703]	>sp|Q15165|PON2_HUMAN Serum paraoxonase/arylesterase 2 OS=Homo sapiens OX=9606 GN=PON2 PE=1 SV=4	Color2 [DarkGray]	1	4		23.6079	18.8551	19.3788	24.1771	23.5677	23.4904
	0.21162	0.260563	K.HTNMN[+1378.476]LTQLK.V	HexNAc(2)Hex(6)	N[+1378]	>sp|Q15165|PON2_HUMAN Serum paraoxonase/arylesterase 2 OS=Homo sapiens OX=9606 GN=PON2 PE=1 SV=4	Color2 [DarkGray]	1	4		27.9444	27.3036	27.423	27.8101	26.4313	27.6479
	0.00830723	0.0219765	K.HTNMN[+1540.529]LTQLK.V	HexNAc(2)Hex(7)	N[+1541]	>sp|Q15165|PON2_HUMAN Serum paraoxonase/arylesterase 2 OS=Homo sapiens OX=9606 GN=PON2 PE=1 SV=4	Color2 [DarkGray]	1	4		26.4781	24.176	26.7708	25.5639	26.359	25.4361
	1.05293	0.92426	K.HTNMN[+1702.581]LTQLK.V	HexNAc(2)Hex(8)	N[+1703]	>sp|Q15165|PON2_HUMAN Serum paraoxonase/arylesterase 2 OS=Homo sapiens OX=9606 GN=PON2 PE=1 SV=4	Color2 [DarkGray]	1	4		28.3593	28.6582	29.6971	28.1268	27.8727	27.9423
	0.239202	-0.891027	K.HVHNGHVFN[+1378.476]GSSR.S	HexNAc(2)Hex(6)	N[+1378]	>sp|Q92833|JARD2_HUMAN Protein Jumonji OS=Homo sapiens OX=9606 GN=JARID2 PE=1 SV=2	Color2 [DarkGray]	1	4		20.4325	19.8284	20.7983	24.0642	19.3285	20.3397
	0.996078	2.11136	K.HYTN[+1216.423]SSQDVTVPC[+57.021]R.V	HexNAc(2)Hex(5)	C[+57], N[+1216]	>sp|P01877|IGHA2_HUMAN Immunoglobulin heavy constant alpha 2 OS=Homo sapiens OX=9606 GN=IGHA2 PE=1 SV=4	Color2 [DarkGray]	1	4		22.5339	19.8673	22.5773	20.3902	19.2806	18.9736
+	2.53538	3.75932	K.HYTN[+1241.454]SSQDVTVPC[+57.021]R.V	HexNAc(3)Hex(3)Fuc(1)	C[+57], N[+1241]	>sp|P01877|IGHA2_HUMAN Immunoglobulin heavy constant alpha 2 OS=Homo sapiens OX=9606 GN=IGHA2 PE=1 SV=4	Color2 [DarkGray]	1	4		23.0084	24.0961	23.43	19.237	20.7227	19.2967
	0.499703	-0.6368	K.HYTN[+1298.476]SSQDVTVPC[+57.021]R.V	HexNAc(4)Hex(3)	C[+57], N[+1298]	>sp|P01877|IGHA2_HUMAN Immunoglobulin heavy constant alpha 2 OS=Homo sapiens OX=9606 GN=IGHA2 PE=1 SV=4	Color2 [DarkGray]	1	4		19.037	18.0664	19.3805	18.6774	19.8457	19.8713
+	2.53705	2.95256	K.HYTN[+1378.476]SSQDVTVPC[+57.021]R.V	HexNAc(2)Hex(6)	C[+57], N[+1378]	>sp|P01877|IGHA2_HUMAN Immunoglobulin heavy constant alpha 2 OS=Homo sapiens OX=9606 GN=IGHA2 PE=1 SV=4	Color2 [DarkGray]	1	4		22.8881	21.6534	22.9845	19.3172	19.8394	19.5118
+	3.05837	6.70224	K.HYTN[+1444.534]SSQDVTVPC[+57.021]R.V	HexNAc(4)Hex(3)Fuc(1)	C[+57], N[+1445]	>sp|P01877|IGHA2_HUMAN Immunoglobulin heavy constant alpha 2 OS=Homo sapiens OX=9606 GN=IGHA2 PE=1 SV=4	Color2 [DarkGray]	1	4		26.6742	26.1218	26.6565	20.3429	20.6677	18.3352
	0.496242	-0.897497	K.HYTN[+1444.534]SSQDVTVPC[+57.021]R.V	HexNAc(4)Hex(3)Fuc(1)	C[+57], N[+1445]	>sp|P0DOX2|IGA2_HUMAN Immunoglobulin alpha-2 heavy chain OS=Homo sapiens OX=9606 PE=1 SV=2	Color2 [DarkGray]	1	4		17.7835	20.0101	19.3699	19.8867	19.242	20.7273
+	3.2912	6.16689	K.HYTN[+1540.529]SSQDVTVPC[+57.021]R.V	HexNAc(2)Hex(7)	C[+57], N[+1541]	>sp|P01877|IGHA2_HUMAN Immunoglobulin heavy constant alpha 2 OS=Homo sapiens OX=9606 GN=IGHA2 PE=1 SV=4	Color2 [DarkGray]	1	4		25.7929	24.6766	26.1035	19.9526	19.5676	18.552
+	2.35517	7.03168	K.HYTN[+1606.587]SSQDVTVPC[+57.021]R.V	HexNAc(4)Hex(4)Fuc(1)	C[+57], N[+1607]	>sp|P01877|IGHA2_HUMAN Immunoglobulin heavy constant alpha 2 OS=Homo sapiens OX=9606 GN=IGHA2 PE=1 SV=4	Color2 [DarkGray]	1	4		23.9611	27.3354	26.9631	20.19	18.3113	18.6633
+	2.09258	10.1321	K.HYTN[+1647.613]SSQDVTVPC[+57.021]R.V	HexNAc(5)Hex(3)Fuc(1)	C[+57], N[+1648]	>sp|P01877|IGHA2_HUMAN Immunoglobulin heavy constant alpha 2 OS=Homo sapiens OX=9606 GN=IGHA2 PE=1 SV=4	Color2 [DarkGray]	1	4		31.3139	31.8184	31.3846	25.4995	19.443	19.1781
	1.28593	-3.82956	K.HYTN[+1647.613]SSQDVTVPC[+57.021]R.V	HexNAc(5)Hex(3)Fuc(1)	C[+57], N[+1648]	>sp|P0DOX2|IGA2_HUMAN Immunoglobulin alpha-2 heavy chain OS=Homo sapiens OX=9606 PE=1 SV=2	Color2 [DarkGray]	1	4		19.658	19.4676	19.0852	20.5402	25.1497	24.0097
	0.26127	1.3558	K.HYTN[+1663.608]SSQDVTVPC[+57.021]R.V	HexNAc(5)Hex(4)	C[+57], N[+1664]	>sp|P01877|IGHA2_HUMAN Immunoglobulin heavy constant alpha 2 OS=Homo sapiens OX=9606 GN=IGHA2 PE=1 SV=4	Color2 [DarkGray]	1	4		19.0403	24.9322	18.6608	19.9794	19.8526	18.7339
+	2.82232	7.419	K.HYTN[+1702.581]SSQDVTVPC[+57.021]R.V	HexNAc(2)Hex(8)	C[+57], N[+1703]	>sp|P01877|IGHA2_HUMAN Immunoglobulin heavy constant alpha 2 OS=Homo sapiens OX=9606 GN=IGHA2 PE=1 SV=4	Color2 [DarkGray]	1	4		27.8468	26.7153	28.1245	21.8474	19.1315	19.4507
	0.511058	-1.60061	K.HYTN[+1702.581]SSQDVTVPC[+57.021]R.V	HexNAc(2)Hex(8)	C[+57], N[+1703]	>sp|P0DOX2|IGA2_HUMAN Immunoglobulin alpha-2 heavy chain OS=Homo sapiens OX=9606 PE=1 SV=2	Color2 [DarkGray]	1	4		19.6565	17.934	19.6281	18.7641	20.2343	23.022
+	2.11125	2.93093	K.HYTN[+1768.640]SSQDVTVPC[+57.021]R.V	HexNAc(4)Hex(5)Fuc(1)	C[+57], N[+1769]	>sp|P01877|IGHA2_HUMAN Immunoglobulin heavy constant alpha 2 OS=Homo sapiens OX=9606 GN=IGHA2 PE=1 SV=4	Color2 [DarkGray]	1	4		23.1251	21.7813	23.3017	19.1743	19.8749	20.3661
	1.90206	7.88459	K.HYTN[+1809.666]SSQDVTVPC[+57.021]R.V	HexNAc(5)Hex(4)Fuc(1)	C[+57], N[+1810]	>sp|P01877|IGHA2_HUMAN Immunoglobulin heavy constant alpha 2 OS=Homo sapiens OX=9606 GN=IGHA2 PE=1 SV=4	Color2 [DarkGray]	1	4		29.5617	27.8757	29.6971	24.5541	20.0664	18.8602
	0.273779	-1.47025	K.HYTN[+1809.666]SSQDVTVPC[+57.021]R.V	HexNAc(5)Hex(4)Fuc(1)	C[+57], N[+1810]	>sp|P0DOX2|IGA2_HUMAN Immunoglobulin alpha-2 heavy chain OS=Homo sapiens OX=9606 PE=1 SV=2	Color2 [DarkGray]	1	4		19.9367	19.0314	19.3261	17.099	24.4947	21.1112
+	3.79565	5.32109	K.HYTN[+1864.634]SSQDVTVPC[+57.021]R.V	HexNAc(2)Hex(9)	C[+57], N[+1865]	>sp|P01877|IGHA2_HUMAN Immunoglobulin heavy constant alpha 2 OS=Homo sapiens OX=9606 GN=IGHA2 PE=1 SV=4	Color2 [DarkGray]	1	4		25.2935	24.4248	25.4115	19.9873	19.9111	19.2681
+	5.71136	8.25462	K.HYTN[+1897.682]SSQDVTVPC[+57.021]R.V	HexNAc(4)Hex(4)Fuc(1)NeuAc(1)	C[+57], N[+1898]	>sp|P01877|IGHA2_HUMAN Immunoglobulin heavy constant alpha 2 OS=Homo sapiens OX=9606 GN=IGHA2 PE=1 SV=4	Color2 [DarkGray]	1	4		27.0851	27.2856	27.401	19.216	18.6574	19.1343
	1.57697	6.2242	K.HYTN[+1971.719]SSQDVTVPC[+57.021]R.V	HexNAc(5)Hex(5)Fuc(1)	C[+57], N[+1972]	>sp|P01877|IGHA2_HUMAN Immunoglobulin heavy constant alpha 2 OS=Homo sapiens OX=9606 GN=IGHA2 PE=1 SV=4	Color2 [DarkGray]	1	4		27.6016	27.1716	28.5045	25.0178	19.2397	20.3476
	0.50791	-2.20448	K.HYTN[+1971.719]SSQDVTVPC[+57.021]R.V	HexNAc(5)Hex(5)Fuc(1)	C[+57], N[+1972]	>sp|P0DOX2|IGA2_HUMAN Immunoglobulin alpha-2 heavy chain OS=Homo sapiens OX=9606 PE=1 SV=2	Color2 [DarkGray]	1	4		20.0622	18.3655	19.2659	18.8436	24.9839	20.4794
	0.586388	0.73671	K.HYTN[+2026.687]SSQDVTVPC[+57.021]R.V	HexNAc(2)Hex(10)	C[+57], N[+2027]	>sp|P01877|IGHA2_HUMAN Immunoglobulin heavy constant alpha 2 OS=Homo sapiens OX=9606 GN=IGHA2 PE=1 SV=4	Color2 [DarkGray]	1	4		20.1434	20.562	20.0931	18.8066	19.1944	20.5874
	1.86542	6.63022	K.HYTN[+2059.735]SSQDVTVPC[+57.021]R.V	HexNAc(4)Hex(5)Fuc(1)NeuAc(1)	C[+57], N[+2060]	>sp|P01877|IGHA2_HUMAN Immunoglobulin heavy constant alpha 2 OS=Homo sapiens OX=9606 GN=IGHA2 PE=1 SV=4	Color2 [DarkGray]	1	4		28.2978	28.7173	28.4639	24.9433	20.8647	19.7803
	0.489497	-2.28519	K.HYTN[+2059.735]SSQDVTVPC[+57.021]R.V	HexNAc(4)Hex(5)Fuc(1)NeuAc(1)	C[+57], N[+2060]	>sp|P0DOX2|IGA2_HUMAN Immunoglobulin alpha-2 heavy chain OS=Homo sapiens OX=9606 PE=1 SV=2	Color2 [DarkGray]	1	4		18.915	21.1564	20.1152	18.5228	24.6784	23.8409
+	4.75495	9.20769	K.HYTN[+2100.761]SSQDVTVPC[+57.021]R.V	HexNAc(5)Hex(4)Fuc(1)NeuAc(1)	C[+57], N[+2101]	>sp|P01877|IGHA2_HUMAN Immunoglobulin heavy constant alpha 2 OS=Homo sapiens OX=9606 GN=IGHA2 PE=1 SV=4	Color2 [DarkGray]	1	4		28.932	28.6041	28.9815	20.2987	19.5468	19.0491
	0.913344	-1.30663	K.HYTN[+2100.761]SSQDVTVPC[+57.021]R.V	HexNAc(5)Hex(4)Fuc(1)NeuAc(1)	C[+57], N[+2101]	>sp|P0DOX2|IGA2_HUMAN Immunoglobulin alpha-2 heavy chain OS=Homo sapiens OX=9606 PE=1 SV=2	Color2 [DarkGray]	1	4		18.6054	19.0002	19.7142	19.3361	20.5613	21.3422
	1.56145	8.35358	K.HYTN[+2262.814]SSQDVTVPC[+57.021]R.V	HexNAc(5)Hex(5)Fuc(1)NeuAc(1)	C[+57], N[+2263]	>sp|P01877|IGHA2_HUMAN Immunoglobulin heavy constant alpha 2 OS=Homo sapiens OX=9606 GN=IGHA2 PE=1 SV=4	Color2 [DarkGray]	1	4		29.1927	29.7578	29.5576	25.9372	19.7073	17.8029
	0.817032	-3.85563	K.HYTN[+2262.814]SSQDVTVPC[+57.021]R.V	HexNAc(5)Hex(5)Fuc(1)NeuAc(1)	C[+57], N[+2263]	>sp|P0DOX2|IGA2_HUMAN Immunoglobulin alpha-2 heavy chain OS=Homo sapiens OX=9606 PE=1 SV=2	Color2 [DarkGray]	1	4		19.3188	19.3292	19.8215	19.0216	25.9738	25.0411
+	2.25073	7.04656	K.HYTN[+2350.830]SSQDVTVPC[+57.021]R.V	HexNAc(4)Hex(5)Fuc(1)NeuAc(2)	C[+57], N[+2351]	>sp|P01877|IGHA2_HUMAN Immunoglobulin heavy constant alpha 2 OS=Homo sapiens OX=9606 GN=IGHA2 PE=1 SV=4	Color2 [DarkGray]	1	4		27.3036	27.1345	27.4517	22.8423	19.018	18.8898
	0.122249	-0.549389	K.HYTN[+2350.830]SSQDVTVPC[+57.021]R.V	HexNAc(4)Hex(5)Fuc(1)NeuAc(2)	C[+57], N[+2351]	>sp|P0DOX2|IGA2_HUMAN Immunoglobulin alpha-2 heavy chain OS=Homo sapiens OX=9606 PE=1 SV=2	Color2 [DarkGray]	1	4		18.9755	20.1879	20.2722	18.8012	18.7475	23.5352
+	2.03866	7.86736	K.HYTN[+2553.910]SSQDVTVPC[+57.021]R.V	HexNAc(5)Hex(5)Fuc(1)NeuAc(2)	C[+57], N[+2554]	>sp|P01877|IGHA2_HUMAN Immunoglobulin heavy constant alpha 2 OS=Homo sapiens OX=9606 GN=IGHA2 PE=1 SV=4	Color2 [DarkGray]	1	4		27.8316	29.1861	27.9593	23.6679	19.0474	18.6597
	1.05936	-2.53611	K.HYTN[+2553.910]SSQDVTVPC[+57.021]R.V	HexNAc(5)Hex(5)Fuc(1)NeuAc(2)	C[+57], N[+2554]	>sp|P0DOX2|IGA2_HUMAN Immunoglobulin alpha-2 heavy chain OS=Homo sapiens OX=9606 PE=1 SV=2	Color2 [DarkGray]	1	4		20.6096	18.7433	19.2811	20.1489	23.3202	22.7733
	0.720495	1.34034	K.HYTN[+2555.925]SSQDVTVPC[+57.021]R.V	HexNAc(7)Hex(7)	C[+57], N[+2556]	>sp|P01877|IGHA2_HUMAN Immunoglobulin heavy constant alpha 2 OS=Homo sapiens OX=9606 GN=IGHA2 PE=1 SV=4	Color2 [DarkGray]	1	4		19.2297	21.9405	19.6755	19.0049	18.6729	19.1469
	0.305223	0.754671	K.HYTN[+2715.963]SSQDVTVPC[+57.021]R.V	HexNAc(5)Hex(6)Fuc(1)NeuAc(2)	C[+57], N[+2716]	>sp|P01877|IGHA2_HUMAN Immunoglobulin heavy constant alpha 2 OS=Homo sapiens OX=9606 GN=IGHA2 PE=1 SV=4	Color2 [DarkGray]	1	4		20.3327	21.0191	18.3742	20.0173	17.9488	19.4959
	0.951756	-1.4397	K.IAEIMIPHEN[+2059.735]R.T	HexNAc(4)Hex(5)Fuc(1)NeuAc(1)	N[+2060]	>sp|P78562|PHEX_HUMAN Phosphate-regulating neutral endopeptidase PHEX OS=Homo sapiens OX=9606 GN=PHEX PE=1 SV=1	Color2 [DarkGray]	1	4		19.2227	19.4065	18.5318	21.4366	20.8115	19.2321
	0.00379214	0.011584	K.IC[+57.021]DLLVANNHFAHFFAPQN[+1913.677]LTNMNK.N	HexNAc(4)Hex(5)NeuAc(1)	C[+57], N[+1914]	>sp|P19827|ITIH1_HUMAN Inter-alpha-trypsin inhibitor heavy chain H1 OS=Homo sapiens OX=9606 GN=ITIH1 PE=1 SV=3	Color2 [DarkGray]	1	4		20.8856	19.4294	19.0122	21.3927	18.7514	19.1484
	0.294496	0.38413	K.IC[+57.021]DLLVANNHFAHFFAPQN[+2204.772]LTNMNK.N	HexNAc(4)Hex(5)NeuAc(2)	C[+57], N[+2205]	>sp|P19827|ITIH1_HUMAN Inter-alpha-trypsin inhibitor heavy chain H1 OS=Homo sapiens OX=9606 GN=ITIH1 PE=1 SV=3	Color2 [DarkGray]	1	4		24.968	26.2229	26.0379	25.9554	25.3951	24.7258
	0.585898	1.32895	K.IDSTGN[+1540.529]VTNELR.V	HexNAc(2)Hex(7)	N[+1541]	>sp|O75882|ATRN_HUMAN Attractin OS=Homo sapiens OX=9606 GN=ATRN PE=1 SV=2	Color2 [DarkGray]	1	4		20.2937	18.7775	22.1145	19.0346	18.5515	19.6128
	0.488355	0.596489	K.IDSTGN[+1702.581]VTNELR.V	HexNAc(2)Hex(8)	N[+1703]	>sp|O75882|ATRN_HUMAN Attractin OS=Homo sapiens OX=9606 GN=ATRN PE=1 SV=2	Color2 [DarkGray]	1	4		20.4132	20.5106	19.1105	19.1245	19.1428	19.9775
	1.03373	1.72597	K.IDSTGN[+1864.634]VTNELR.V	HexNAc(2)Hex(9)	N[+1865]	>sp|O75882|ATRN_HUMAN Attractin OS=Homo sapiens OX=9606 GN=ATRN PE=1 SV=2	Color2 [DarkGray]	1	4		21.949	21.79	19.7505	19.1872	20.1048	19.0196
	1.44516	-1.63991	K.IDVNSWIEN[+1540.529]FTK.T	HexNAc(2)Hex(7)	N[+1541]	>sp|P54289|CA2D1_HUMAN Voltage-dependent calcium channel subunit alpha-2/delta-1 OS=Homo sapiens OX=9606 GN=CACNA2D1 PE=1 SV=3	Color2 [DarkGray]	1	4		18.97	19.9093	19.6637	22.0433	20.7737	20.6456
	0.124275	-0.345657	K.IDVNSWIEN[+1702.581]FTK.T	HexNAc(2)Hex(8)	N[+1703]	>sp|P54289|CA2D1_HUMAN Voltage-dependent calcium channel subunit alpha-2/delta-1 OS=Homo sapiens OX=9606 GN=CACNA2D1 PE=1 SV=3	Color2 [DarkGray]	1	4		19.8468	18.9782	17.4501	18.0341	20.5191	18.759
+	3.58669	3.46218	K.IEVLVSN[+1702.581]ATQFIILHSK.D	HexNAc(2)Hex(8)	N[+1703]	>sp|Q6P179|ERAP2_HUMAN Endoplasmic reticulum aminopeptidase 2 OS=Homo sapiens OX=9606 GN=ERAP2 PE=1 SV=2	Color2 [DarkGray]	1	4		22.7647	23.2684	23.4286	19.9653	19.2992	19.8107
	1.04897	3.41779	K.IFDKN[+1216.423]STFGSVEVHNLQPEK.V	HexNAc(2)Hex(5)	N[+1216]	>sp|P28907|CD38_HUMAN ADP-ribosyl cyclase/cyclic ADP-ribose hydrolase 1 OS=Homo sapiens OX=9606 GN=CD38 PE=1 SV=2	Color2 [DarkGray]	1	4		24.0017	20.1971	24.9381	19.0881	20.6092	19.1863
	2.55111	1.38482	K.IFDKN[+1378.476]STFGSVEVHNLQPEK.V	HexNAc(2)Hex(6)	N[+1378]	>sp|P28907|CD38_HUMAN ADP-ribosyl cyclase/cyclic ADP-ribose hydrolase 1 OS=Homo sapiens OX=9606 GN=CD38 PE=1 SV=2	Color2 [DarkGray]	1	4		20.4917	20.3346	20.6158	18.7725	19.0683	19.447
	1.29126	1.59098	K.IFDKN[+1419.502]STFGSVEVHNLQPEK.V	HexNAc(3)Hex(5)	N[+1420]	>sp|P28907|CD38_HUMAN ADP-ribosyl cyclase/cyclic ADP-ribose hydrolase 1 OS=Homo sapiens OX=9606 GN=CD38 PE=1 SV=2	Color2 [DarkGray]	1	4		21.1093	20.435	19.8965	18.7736	18.1587	19.7355
	0.815994	2.49534	K.IFDKN[+1540.529]STFGSVEVHNLQPEK.V	HexNAc(2)Hex(7)	N[+1541]	>sp|P28907|CD38_HUMAN ADP-ribosyl cyclase/cyclic ADP-ribose hydrolase 1 OS=Homo sapiens OX=9606 GN=CD38 PE=1 SV=2	Color2 [DarkGray]	1	4		18.9878	21.9984	23.6431	19.1618	19.6464	18.3351
	0.844548	1.1087	K.IFDKN[+1548.545]STFGSVEVHNLQPEK.V	HexNAc(3)Hex(4)NeuAc(1)	N[+1549]	>sp|P28907|CD38_HUMAN ADP-ribosyl cyclase/cyclic ADP-ribose hydrolase 1 OS=Homo sapiens OX=9606 GN=CD38 PE=1 SV=2	Color2 [DarkGray]	1	4		19.4721	21.1243	21.3387	19.2287	19.7059	19.6743
	0.889484	2.14571	K.IFDKN[+1581.555]STFGSVEVHNLQPEK.V	HexNAc(3)Hex(6)	N[+1582]	>sp|P28907|CD38_HUMAN ADP-ribosyl cyclase/cyclic ADP-ribose hydrolase 1 OS=Homo sapiens OX=9606 GN=CD38 PE=1 SV=2	Color2 [DarkGray]	1	4		18.8938	21.7414	21.9974	19.2289	19.2828	17.6838
	0.509265	2.13202	K.IFDKN[+1694.603]STFGSVEVHNLQPEK.V	HexNAc(3)Hex(4)Fuc(1)NeuAc(1)	N[+1695]	>sp|P28907|CD38_HUMAN ADP-ribosyl cyclase/cyclic ADP-ribose hydrolase 1 OS=Homo sapiens OX=9606 GN=CD38 PE=1 SV=2	Color2 [DarkGray]	1	4		18.2198	23.705	23.6515	19.6878	20.1358	19.3567
	0.372913	-0.656904	K.IFDKN[+1702.581]STFGSVEVHNLQPEK.V	HexNAc(2)Hex(8)	N[+1703]	>sp|P28907|CD38_HUMAN ADP-ribosyl cyclase/cyclic ADP-ribose hydrolase 1 OS=Homo sapiens OX=9606 GN=CD38 PE=1 SV=2	Color2 [DarkGray]	1	4		19.1349	19.6668	19.3573	21.4848	19.3862	19.2586
+	4.09923	7.2282	K.IFDKN[+1710.598]STFGSVEVHNLQPEK.V	HexNAc(3)Hex(5)NeuAc(1)	N[+1711]	>sp|P28907|CD38_HUMAN ADP-ribosyl cyclase/cyclic ADP-ribose hydrolase 1 OS=Homo sapiens OX=9606 GN=CD38 PE=1 SV=2	Color2 [DarkGray]	1	4		27.1225	27.0175	26.8324	19.8751	18.967	20.4459
+	2.37228	6.51643	K.IFDKN[+1872.651]STFGSVEVHNLQPEK.V	HexNAc(3)Hex(6)NeuAc(1)	N[+1873]	>sp|P28907|CD38_HUMAN ADP-ribosyl cyclase/cyclic ADP-ribose hydrolase 1 OS=Homo sapiens OX=9606 GN=CD38 PE=1 SV=2	Color2 [DarkGray]	1	4		26.2954	27.3581	27.5111	21.1494	21.964	18.5019
+	2.52824	4.53526	K.IFDKN[+2018.708]STFGSVEVHNLQPEK.V	HexNAc(3)Hex(6)Fuc(1)NeuAc(1)	N[+2019]	>sp|P28907|CD38_HUMAN ADP-ribosyl cyclase/cyclic ADP-ribose hydrolase 1 OS=Homo sapiens OX=9606 GN=CD38 PE=1 SV=2	Color2 [DarkGray]	1	4		23.1877	24.209	25.3762	19.4631	20.3324	19.3716
	0.729316	1.67351	K.IFDKN[+2204.772]STFGSVEVHNLQPEK.V	HexNAc(4)Hex(5)NeuAc(2)	N[+2205]	>sp|P28907|CD38_HUMAN ADP-ribosyl cyclase/cyclic ADP-ribose hydrolase 1 OS=Homo sapiens OX=9606 GN=CD38 PE=1 SV=2	Color2 [DarkGray]	1	4		19.177	22.525	20.6124	19.9022	18.6127	18.779
+	3.0623	5.93851	K.IFDKN[+2350.830]STFGSVEVHNLQPEK.V	HexNAc(4)Hex(5)Fuc(1)NeuAc(2)	N[+2351]	>sp|P28907|CD38_HUMAN ADP-ribosyl cyclase/cyclic ADP-ribose hydrolase 1 OS=Homo sapiens OX=9606 GN=CD38 PE=1 SV=2	Color2 [DarkGray]	1	4		24.6711	25.3157	24.9386	18.8762	20.2123	18.0214
	0.445623	1.22422	K.IFIFN[+1702.581]QTGIEAK.K	HexNAc(2)Hex(8)	N[+1703]	>sp|Q96J42|TXD15_HUMAN Thioredoxin domain-containing protein 15 OS=Homo sapiens OX=9606 GN=TXNDC15 PE=1 SV=1	Color2 [DarkGray]	1	4		21.3343	20.9973	22.28	21.9445	20.8179	18.1765
	0.696096	-0.596616	K.IFIFN[+1864.634]QTGIEAK.K	HexNAc(2)Hex(9)	N[+1865]	>sp|Q96J42|TXD15_HUMAN Thioredoxin domain-containing protein 15 OS=Homo sapiens OX=9606 GN=TXNDC15 PE=1 SV=1	Color2 [DarkGray]	1	4		19.9129	19.9518	20.4869	21.2246	20.0596	20.8573
+	3.45965	-4.67278	K.IGDENC[+57.021]DPEC[+57.021]N[+1216.423]HTLTGHDGGDC[+57.021]R.H	HexNAc(2)Hex(5)	C[+57]*3, N[+1216]	>sp|Q13219|PAPP1_HUMAN Pappalysin-1 OS=Homo sapiens OX=9606 GN=PAPPA PE=1 SV=3	Color2 [DarkGray]	1	4		18.7344	19.7002	18.356	23.7452	23.6562	23.4076
	0.263589	0.814882	K.IGFLKPHEN[+2424.867]K.T	HexNAc(5)Hex(6)Fuc(1)NeuAc(1)	N[+2425]	>sp|P13612|ITA4_HUMAN Integrin alpha-4 OS=Homo sapiens OX=9606 GN=ITGA4 PE=1 SV=3	Color2 [DarkGray]	1	4		18.9649	22.4613	19.3307	20.4926	19.1042	18.7156
+	3.09474	4.2939	K.IIEGEPNLKVPGN[+2059.735]VTAVLGETLK.V	HexNAc(4)Hex(5)Fuc(1)NeuAc(1)	N[+2060]	>sp|P01833|PIGR_HUMAN Polymeric immunoglobulin receptor OS=Homo sapiens OX=9606 GN=PIGR PE=1 SV=4	Color2 [DarkGray]	1	4		24.1069	23.1641	23.644	19.8911	19.5396	18.6025
	0.557358	1.21719	K.IIEGEPNLKVPGN[+2100.761]VTAVLGETLK.V	HexNAc(5)Hex(4)Fuc(1)NeuAc(1)	N[+2101]	>sp|P01833|PIGR_HUMAN Polymeric immunoglobulin receptor OS=Homo sapiens OX=9606 GN=PIGR PE=1 SV=4	Color2 [DarkGray]	1	4		19.9423	21.5789	19.8132	20.0185	17.6598	20.0046
	0.37747	1.84061	K.IIEGEPNLKVPGN[+2204.772]VTAVLGETLK.V	HexNAc(4)Hex(5)NeuAc(2)	N[+2205]	>sp|P01833|PIGR_HUMAN Polymeric immunoglobulin receptor OS=Homo sapiens OX=9606 GN=PIGR PE=1 SV=4	Color2 [DarkGray]	1	4		19.1306	25.4073	19.4977	19.9408	19.4019	19.1711
+	4.17905	8.09528	K.IIEGEPNLKVPGN[+2350.830]VTAVLGETLK.V	HexNAc(4)Hex(5)Fuc(1)NeuAc(2)	N[+2351]	>sp|P01833|PIGR_HUMAN Polymeric immunoglobulin receptor OS=Homo sapiens OX=9606 GN=PIGR PE=1 SV=4	Color2 [DarkGray]	1	4		27.3325	27.9154	27.3382	20.1125	18.644	19.5438
	1.84002	2.56463	K.IIEGEPNLKVPGN[+2391.857]VTAVLGETLK.V	HexNAc(5)Hex(4)Fuc(1)NeuAc(2)	N[+2392]	>sp|P01833|PIGR_HUMAN Polymeric immunoglobulin receptor OS=Homo sapiens OX=9606 GN=PIGR PE=1 SV=4	Color2 [DarkGray]	1	4		21.4383	22.9247	22.9719	19.3761	20.5837	19.6812
	0.426646	-0.182808	K.IIISPEEN[+1872.651]VTLTC[+57.021]TAENQLER.T	HexNAc(3)Hex(6)NeuAc(1)	C[+57], N[+1873]	>sp|Q13740|CD166_HUMAN CD166 antigen OS=Homo sapiens OX=9606 GN=ALCAM PE=1 SV=2	Color2 [DarkGray]	1	4		19.3002	19.4177	18.9857	19.3237	19.2544	19.674
	0.325936	-0.994427	K.IIISPEEN[+2059.735]VTLTC[+57.021]TAENQLER.T	HexNAc(4)Hex(5)Fuc(1)NeuAc(1)	C[+57], N[+2060]	>sp|Q13740|CD166_HUMAN CD166 antigen OS=Homo sapiens OX=9606 GN=ALCAM PE=1 SV=2	Color2 [DarkGray]	1	4		22.602	19.9644	23.9558	23.7917	23.4095	22.3042
	0.118883	0.323092	K.IIISPEEN[+2350.830]VTLTC[+57.021]TAENQLER.T	HexNAc(4)Hex(5)Fuc(1)NeuAc(2)	C[+57], N[+2351]	>sp|Q13740|CD166_HUMAN CD166 antigen OS=Homo sapiens OX=9606 GN=ALCAM PE=1 SV=2	Color2 [DarkGray]	1	4		21.6922	22.0409	19.8033	21.8386	21.24	19.4886
	0.945092	2.83786	K.IIISPEEN[+2424.867]VTLTC[+57.021]TAENQLER.T	HexNAc(5)Hex(6)Fuc(1)NeuAc(1)	C[+57], N[+2425]	>sp|Q13740|CD166_HUMAN CD166 antigen OS=Homo sapiens OX=9606 GN=ALCAM PE=1 SV=2	Color2 [DarkGray]	1	4		20.7474	21.1677	24.6229	20.3077	18.0232	19.6935
	0.490926	-0.933942	K.ILAPAYFILGGN[+1378.476]QSGEGC[+57.021]VITR.D	HexNAc(2)Hex(6)	C[+57], N[+1378]	>sp|Q13510|ASAH1_HUMAN Acid ceramidase OS=Homo sapiens OX=9606 GN=ASAH1 PE=1 SV=5	Color2 [DarkGray]	1	4		20.9575	19.8125	19.8795	22.6317	20.3543	20.4653
	0.625395	1.2933	K.ILAPAYFILGGN[+1540.529]QSGEGC[+57.021]VITR.D	HexNAc(2)Hex(7)	C[+57], N[+1541]	>sp|Q13510|ASAH1_HUMAN Acid ceramidase OS=Homo sapiens OX=9606 GN=ASAH1 PE=1 SV=5	Color2 [DarkGray]	1	4		24.9165	22.9835	25.582	23.9031	23.4864	22.2126
	0.400823	1.01212	K.ILAPAYFILGGN[+1702.581]QSGEGC[+57.021]VITR.D	HexNAc(2)Hex(8)	C[+57], N[+1703]	>sp|Q13510|ASAH1_HUMAN Acid ceramidase OS=Homo sapiens OX=9606 GN=ASAH1 PE=1 SV=5	Color2 [DarkGray]	1	4		18.9485	21.9688	22.0279	19.8895	20.5771	19.4422
	0.164413	0.409868	K.ILAPAYFILGGN[+1704.635]QSGEGC[+57.021]VITR.D	HexNAc(6)Hex(3)	C[+57], N[+1705]	>sp|Q13510|ASAH1_HUMAN Acid ceramidase OS=Homo sapiens OX=9606 GN=ASAH1 PE=1 SV=5	Color2 [DarkGray]	1	4		21.995	19.9437	19.9691	19.0921	21.3336	20.2526
	0.243193	-1.67635	K.ILAPAYFILGGN[+1864.634]QSGEGC[+57.021]VITR.D	HexNAc(2)Hex(9)	C[+57], N[+1865]	>sp|Q13510|ASAH1_HUMAN Acid ceramidase OS=Homo sapiens OX=9606 GN=ASAH1 PE=1 SV=5	Color2 [DarkGray]	1	4		20.39	19.4789	20.5202	27.1101	20.0463	18.2617
	0.115648	0.45428	K.ILAPAYFILGGN[+1872.651]QSGEGC[+57.021]VITR.D	HexNAc(3)Hex(6)NeuAc(1)	C[+57], N[+1873]	>sp|Q13510|ASAH1_HUMAN Acid ceramidase OS=Homo sapiens OX=9606 GN=ASAH1 PE=1 SV=5	Color2 [DarkGray]	1	4		20.9503	20.0009	21.43	23.0562	19.2003	18.7619
	0.194879	-0.37479	K.ILAPAYFILGGN[+1913.677]QSGEGC[+57.021]VITR.D	HexNAc(4)Hex(5)NeuAc(1)	C[+57], N[+1914]	>sp|Q13510|ASAH1_HUMAN Acid ceramidase OS=Homo sapiens OX=9606 GN=ASAH1 PE=1 SV=5	Color2 [DarkGray]	1	4		19.5553	19.9306	18.1393	19.1323	19.0402	20.5771
	0.257214	-0.489555	K.ILAPAYFILGGN[+1946.687]QSGEGC[+57.021]VITR.D	HexNAc(4)Hex(7)	C[+57], N[+1947]	>sp|Q13510|ASAH1_HUMAN Acid ceramidase OS=Homo sapiens OX=9606 GN=ASAH1 PE=1 SV=5	Color2 [DarkGray]	1	4		18.0713	18.4355	19.2936	20.4033	18.2561	18.6097
	0.315981	0.775921	K.ILAPAYFILGGN[+2053.772]QSGEGC[+57.021]VITR.D	HexNAc(7)Hex(3)Fuc(1)	C[+57], N[+2054]	>sp|Q13510|ASAH1_HUMAN Acid ceramidase OS=Homo sapiens OX=9606 GN=ASAH1 PE=1 SV=5	Color2 [DarkGray]	1	4		19.6757	19.8565	22.6118	19.52	19.7123	20.5839
	1.11992	2.99088	K.ILAPAYFILGGN[+2204.772]QSGEGC[+57.021]VITR.D	HexNAc(4)Hex(5)NeuAc(2)	C[+57], N[+2205]	>sp|Q13510|ASAH1_HUMAN Acid ceramidase OS=Homo sapiens OX=9606 GN=ASAH1 PE=1 SV=5	Color2 [DarkGray]	1	4		22.7426	23.4464	24.0161	18.9524	22.7922	19.4878
	0.10862	-0.320119	K.ILGDKVN[+1378.476]NTAVIEK.Q	HexNAc(2)Hex(6)	N[+1378]	>sp|Q9H330|TM245_HUMAN Transmembrane protein 245 OS=Homo sapiens OX=9606 GN=TMEM245 PE=1 SV=3	Color2 [DarkGray]	1	4		20.4038	18.426	19.7486	21.5746	19.3659	18.5982
+	2.82455	-4.26962	K.ILGDKVN[+1540.529]NTAVIEK.Q	HexNAc(2)Hex(7)	N[+1541]	>sp|Q9H330|TM245_HUMAN Transmembrane protein 245 OS=Homo sapiens OX=9606 GN=TMEM245 PE=1 SV=3	Color2 [DarkGray]	1	4		18.3282	19.7578	19.9011	23.1816	23.9653	23.6491
	0.0831778	0.16199	K.ILGDKVN[+1702.581]NTAVIEK.Q	HexNAc(2)Hex(8)	N[+1703]	>sp|Q9H330|TM245_HUMAN Transmembrane protein 245 OS=Homo sapiens OX=9606 GN=TMEM245 PE=1 SV=3	Color2 [DarkGray]	1	4		23.2879	25.0187	24.8885	23.4255	24.6911	24.5925
	1.89894	-4.56024	K.ILGDKVN[+1864.634]NTAVIEK.Q	HexNAc(2)Hex(9)	N[+1865]	>sp|Q9H330|TM245_HUMAN Transmembrane protein 245 OS=Homo sapiens OX=9606 GN=TMEM245 PE=1 SV=3	Color2 [DarkGray]	1	4		19.2663	20.1138	22.7665	25.175	25.1587	25.4935
	0.410039	0.461442	K.ILLTC[+57.021]SLN[+1540.529]DSATEVTGHR.W	HexNAc(2)Hex(7)	C[+57], N[+1541]	>sp|P35613|BASI_HUMAN Basigin OS=Homo sapiens OX=9606 GN=BSG PE=1 SV=2	Color2 [DarkGray]	1	4		20.224	20.7652	20.336	20.0302	20.7312	19.1795
	2.56697	0.269813	K.ILLTC[+57.021]SLN[+1702.581]DSATEVTGHR.W	HexNAc(2)Hex(8)	C[+57], N[+1703]	>sp|P35613|BASI_HUMAN Basigin OS=Homo sapiens OX=9606 GN=BSG PE=1 SV=2	Color2 [DarkGray]	1	4		21.3997	21.4076	21.3393	21.1087	21.0544	21.1741
	1.97185	1.57745	K.ILLTC[+57.021]SLN[+2350.830]DSATEVTGHR.W	HexNAc(4)Hex(5)Fuc(1)NeuAc(2)	C[+57], N[+2351]	>sp|P35613|BASI_HUMAN Basigin OS=Homo sapiens OX=9606 GN=BSG PE=1 SV=2	Color2 [DarkGray]	1	4		20.92	20.3577	20.6545	18.8603	18.6653	19.6744
+	3.38523	-6.43419	K.ILMNEGGHYN[+1768.640]ASSGK.F	HexNAc(4)Hex(5)Fuc(1)	N[+1769]	>sp|Q9BXJ5|C1QT2_HUMAN Complement C1q tumor necrosis factor-related protein 2 OS=Homo sapiens OX=9606 GN=C1QTNF2 PE=1 SV=1	Color2 [DarkGray]	1	4		18.5643	19.523	19.2056	26.1804	25.9176	24.4975
	0.263729	0.367768	K.IN[+1216.423]NTHALVSLLQNLNK.A	HexNAc(2)Hex(5)	N[+1216]	>sp|P55290|CAD13_HUMAN Cadherin-13 OS=Homo sapiens OX=9606 GN=CDH13 PE=1 SV=1	Color2 [DarkGray]	1	4		20.264	18.8325	18.8655	18.363	19.2681	19.2277
	0.159765	-0.570743	K.IN[+1419.502]NTHALVSLLQNLNK.A	HexNAc(3)Hex(5)	N[+1420]	>sp|P55290|CAD13_HUMAN Cadherin-13 OS=Homo sapiens OX=9606 GN=CDH13 PE=1 SV=1	Color2 [DarkGray]	1	4		20.3517	19.726	19.4079	22.635	20.4698	18.0931
	0.452358	0.873576	K.IN[+1548.545]NTHALVSLLQNLNK.A	HexNAc(3)Hex(4)NeuAc(1)	N[+1549]	>sp|P55290|CAD13_HUMAN Cadherin-13 OS=Homo sapiens OX=9606 GN=CDH13 PE=1 SV=1	Color2 [DarkGray]	1	4		18.7627	19.0799	20.9169	19.6386	18.5336	17.9665
	0.650866	-3.55508	K.IN[+1581.555]NTHALVSLLQNLNK.A	HexNAc(3)Hex(6)	N[+1582]	>sp|P55290|CAD13_HUMAN Cadherin-13 OS=Homo sapiens OX=9606 GN=CDH13 PE=1 SV=1	Color2 [DarkGray]	1	4		19.3938	18.3873	21.7549	25.9189	25.3899	18.8926
	0.700504	-2.13141	K.IN[+1622.582]NTHALVSLLQNLNK.A	HexNAc(4)Hex(5)	N[+1623]	>sp|P55290|CAD13_HUMAN Cadherin-13 OS=Homo sapiens OX=9606 GN=CDH13 PE=1 SV=1	Color2 [DarkGray]	1	4		18.4896	19.314	19.8812	24	20.2781	19.8009
+	3.52896	-5.44208	K.IN[+1710.598]NTHALVSLLQNLNK.A	HexNAc(3)Hex(5)NeuAc(1)	N[+1711]	>sp|P55290|CAD13_HUMAN Cadherin-13 OS=Homo sapiens OX=9606 GN=CDH13 PE=1 SV=1	Color2 [DarkGray]	1	4		20.0525	19.5378	18.7537	25.3272	24.4112	24.9318
	0.969667	-2.23161	K.IN[+1768.640]GTQIC[+57.021]PNDLVAFHDFSSDLENVPHLR.Y	HexNAc(4)Hex(5)Fuc(1)	C[+57], N[+1769]	>sp|P51888|PRELP_HUMAN Prolargin OS=Homo sapiens OX=9606 GN=PRELP PE=1 SV=1	Color2 [DarkGray]	1	4		19.2331	19.7641	18.9233	19.5472	23.1105	21.9576
+	2.50922	-6.67873	K.IN[+1872.651]NTHALVSLLQNLNK.A	HexNAc(3)Hex(6)NeuAc(1)	N[+1873]	>sp|P55290|CAD13_HUMAN Cadherin-13 OS=Homo sapiens OX=9606 GN=CDH13 PE=1 SV=1	Color2 [DarkGray]	1	4		18.3796	20.143	20.3676	25.9749	27.8964	25.0552
+	2.17162	-4.08212	K.IN[+1913.677]NTHALVSLLQNLNK.A	HexNAc(4)Hex(5)NeuAc(1)	N[+1914]	>sp|P55290|CAD13_HUMAN Cadherin-13 OS=Homo sapiens OX=9606 GN=CDH13 PE=1 SV=1	Color2 [DarkGray]	1	4		17.7611	19.8201	19.8101	22.4167	23.6564	23.5646
	1.38025	-4.63645	K.IN[+2059.735]GTQIC[+57.021]PNDLVAFHDFSSDLENVPHLR.Y	HexNAc(4)Hex(5)Fuc(1)NeuAc(1)	C[+57], N[+2060]	>sp|P51888|PRELP_HUMAN Prolargin OS=Homo sapiens OX=9606 GN=PRELP PE=1 SV=1	Color2 [DarkGray]	1	4		18.8433	23.3917	22.4911	24.9203	26.2904	27.4248
	0.946117	-1.77643	K.IN[+2059.735]YTVPQSGTFK.I	HexNAc(4)Hex(5)Fuc(1)NeuAc(1)	N[+2060]	>sp|Q6YHK3|CD109_HUMAN CD109 antigen OS=Homo sapiens OX=9606 GN=CD109 PE=1 SV=2	Color2 [DarkGray]	1	4		19.4397	19.7387	19.589	19.9033	22.9268	21.2666
	0.77302	-2.27216	K.IN[+2133.772]GTQIC[+57.021]PNDLVAFHDFSSDLENVPHLR.Y	HexNAc(5)Hex(6)Fuc(1)	C[+57], N[+2134]	>sp|P51888|PRELP_HUMAN Prolargin OS=Homo sapiens OX=9606 GN=PRELP PE=1 SV=1	Color2 [DarkGray]	1	4		18.8665	18.9315	20.4064	20.8362	24.1457	20.039
	1.14536	-0.872771	K.IN[+2350.830]GTQIC[+57.021]PNDLVAFHDFSSDLENVPHLR.Y	HexNAc(4)Hex(5)Fuc(1)NeuAc(2)	C[+57], N[+2351]	>sp|P51888|PRELP_HUMAN Prolargin OS=Homo sapiens OX=9606 GN=PRELP PE=1 SV=1	Color2 [DarkGray]	1	4		25.1114	24.8771	25.2797	25.3365	26.5004	26.0496
+	2.06055	-3.76055	K.IN[+2424.867]GTQIC[+57.021]PNDLVAFHDFSSDLENVPHLR.Y	HexNAc(5)Hex(6)Fuc(1)NeuAc(1)	C[+57], N[+2425]	>sp|P51888|PRELP_HUMAN Prolargin OS=Homo sapiens OX=9606 GN=PRELP PE=1 SV=1	Color2 [DarkGray]	1	4		18.6839	19.8177	19.6868	21.9736	24.3909	23.1056
	0.135141	0.50628	K.IN[+2715.963]GTQIC[+57.021]PNDLVAFHDFSSDLENVPHLR.Y	HexNAc(5)Hex(6)Fuc(1)NeuAc(2)	C[+57], N[+2716]	>sp|P51888|PRELP_HUMAN Prolargin OS=Homo sapiens OX=9606 GN=PRELP PE=1 SV=1	Color2 [DarkGray]	1	4		23.1578	27.0384	26.8972	24.107	25.7233	25.7443
	0.488149	-1.81267	K.IN[+2789.999]GTQIC[+57.021]PNDLVAFHDFSSDLENVPHLR.Y	HexNAc(6)Hex(7)Fuc(1)NeuAc(1)	C[+57], N[+2790]	>sp|P51888|PRELP_HUMAN Prolargin OS=Homo sapiens OX=9606 GN=PRELP PE=1 SV=1	Color2 [DarkGray]	1	4		19.769	19.4743	20.0819	20.2554	24.7873	19.7205
	0.201323	-0.569017	K.IN[+3007.058]GTQIC[+57.021]PNDLVAFHDFSSDLENVPHLR.Y	HexNAc(5)Hex(6)Fuc(1)NeuAc(3)	C[+57], N[+3007]	>sp|P51888|PRELP_HUMAN Prolargin OS=Homo sapiens OX=9606 GN=PRELP PE=1 SV=1	Color2 [DarkGray]	1	4		19.6665	19.0898	20.5201	19.4482	19.1985	22.3368
	0.816095	-1.06389	K.IN[+3009.074]GTQIC[+57.021]PNDLVAFHDFSSDLENVPHLR.Y	HexNAc(7)Hex(8)NeuAc(1)	C[+57], N[+3009]	>sp|P51888|PRELP_HUMAN Prolargin OS=Homo sapiens OX=9606 GN=PRELP PE=1 SV=1	Color2 [DarkGray]	1	4		19.1642	18.9369	19.4691	19.3356	20.0895	21.3368
+	2.52719	-4.67498	K.IN[+3081.095]GTQIC[+57.021]PNDLVAFHDFSSDLENVPHLR.Y	HexNAc(6)Hex(7)Fuc(1)NeuAc(2)	C[+57], N[+3081]	>sp|P51888|PRELP_HUMAN Prolargin OS=Homo sapiens OX=9606 GN=PRELP PE=1 SV=1	Color2 [DarkGray]	1	4		21.3603	19.1714	20.1171	25.3153	25.1639	24.1945
	1.82092	-2.29667	K.IN[+3155.132]GTQIC[+57.021]PNDLVAFHDFSSDLENVPHLR.Y	HexNAc(7)Hex(8)Fuc(1)NeuAc(1)	C[+57], N[+3155]	>sp|P51888|PRELP_HUMAN Prolargin OS=Homo sapiens OX=9606 GN=PRELP PE=1 SV=1	Color2 [DarkGray]	1	4		20.5416	19.4429	20.485	21.6469	22.5726	23.14
	0.429335	-1.81413	K.IN[+3446.227]GTQIC[+57.021]PNDLVAFHDFSSDLENVPHLR.Y	HexNAc(7)Hex(8)Fuc(1)NeuAc(2)	C[+57], N[+3446]	>sp|P51888|PRELP_HUMAN Prolargin OS=Homo sapiens OX=9606 GN=PRELP PE=1 SV=1	Color2 [DarkGray]	1	4		19.1007	21.6208	19.6856	19.8194	20.8593	25.1708
	0.09969	0.176146	K.INGSAN[+1702.581]FSFNDEEMK.N	HexNAc(2)Hex(8)	N[+1703]	>sp|Q6YHK3|CD109_HUMAN CD109 antigen OS=Homo sapiens OX=9606 GN=CD109 PE=1 SV=2	Color2 [DarkGray]	1	4		19.552	19.4796	19.5744	20.6243	18.7793	18.674
	0.0583596	0.25197	K.IPC[+57.021]SQPPQIEHGTIN[+1913.677]SSR.S	HexNAc(4)Hex(5)NeuAc(1)	C[+57], N[+1914]	>sp|P08603|CFAH_HUMAN Complement factor H OS=Homo sapiens OX=9606 GN=CFH PE=1 SV=4	Color2 [DarkGray]	1	4		19.9928	18.0505	22.6018	20.1501	18.6633	21.0757
	0.701579	1.16861	K.IPC[+57.021]SQPPQIEHGTIN[+2204.772]SSR.S	HexNAc(4)Hex(5)NeuAc(2)	C[+57], N[+2205]	>sp|P08603|CFAH_HUMAN Complement factor H OS=Homo sapiens OX=9606 GN=CFH PE=1 SV=4	Color2 [DarkGray]	1	4		27.3498	26.4378	28.1545	27.2895	25.6822	25.4645
	0.0745224	-0.259876	K.IPC[+57.021]SQPPQIEHGTIN[+2350.830]SSR.S	HexNAc(4)Hex(5)Fuc(1)NeuAc(2)	C[+57], N[+2351]	>sp|P08603|CFAH_HUMAN Complement factor H OS=Homo sapiens OX=9606 GN=CFH PE=1 SV=4	Color2 [DarkGray]	1	4		18.7159	18.4056	22.1239	20.013	20.4992	19.5129
	0.606825	0.842938	K.IQATNTWLFLSSC[+57.021]NGN[+2059.735]ETSLWDC[+57.021]K.N	HexNAc(4)Hex(5)Fuc(1)NeuAc(1)	C[+57]*2, N[+2060]	>sp|Q86VB7|C163A_HUMAN Scavenger receptor cysteine-rich type 1 protein M130 OS=Homo sapiens OX=9606 GN=CD163 PE=1 SV=2	Color2 [DarkGray]	1	4		21.0971	19.1374	19.9577	18.7476	19.6207	19.2951
	0.829724	1.01556	K.IQATNTWLFLSSC[+57.021]NGN[+2424.867]ETSLWDC[+57.021]K.N	HexNAc(5)Hex(6)Fuc(1)NeuAc(1)	C[+57]*2, N[+2425]	>sp|Q86VB7|C163A_HUMAN Scavenger receptor cysteine-rich type 1 protein M130 OS=Homo sapiens OX=9606 GN=CD163 PE=1 SV=2	Color2 [DarkGray]	1	4		20.4211	19.5933	21.1179	19.9982	18.7612	19.3262
	0.256158	0.594244	K.IQGM[+15.995]EHLENGPSVSVDYN[+2059.735]TSDPLIR.W	HexNAc(4)Hex(5)Fuc(1)NeuAc(1)	M[+16], N[+2060]	>sp|Q9HBL0|TENS1_HUMAN Tensin-1 OS=Homo sapiens OX=9606 GN=TNS1 PE=1 SV=2	Color2 [DarkGray]	1	4		17.7983	20.6513	20.4408	19.1308	19.1185	18.8585
	0.94141	2.74337	K.IQQESLGSAPLMGDDHPN[+1378.476]ASR.D	HexNAc(2)Hex(6)	N[+1378]	>sp|Q5JRA6|TGO1_HUMAN Transport and Golgi organization protein 1 homolog OS=Homo sapiens OX=9606 GN=MIA3 PE=1 SV=1	Color2 [DarkGray]	1	4		19.1389	22.8849	23.3939	18.6472	19.4813	19.0591
	0.231323	-0.577426	K.IQSPLFTLDANADIGN[+2204.772]GTTSANEAGIAASITAK.G	HexNAc(4)Hex(5)NeuAc(2)	N[+2205]	>sp|P04114|APOB_HUMAN Apolipoprotein B-100 OS=Homo sapiens OX=9606 GN=APOB PE=1 SV=2	Color2 [DarkGray]	1	4		20.4214	19.2982	19.098	19.6047	21.9272	19.018
	0.967183	-2.93603	K.IRTLLN[+2075.730]ASC[+57.021]DNMLMGIK.S	HexNAc(4)Hex(6)NeuAc(1)	C[+57], N[+2076]	>sp|Q6UWY5|OLFL1_HUMAN Olfactomedin-like protein 1 OS=Homo sapiens OX=9606 GN=OLFML1 PE=1 SV=2	Color2 [DarkGray]	1	4		18.5751	19.1215	18.8542	24.6028	20.5801	20.176
	0.863734	-0.97663	K.ISDN[+2059.735]NTEFLLNFNEFIDR.K	HexNAc(4)Hex(5)Fuc(1)NeuAc(1)	N[+2060]	>sp|P54289|CA2D1_HUMAN Voltage-dependent calcium channel subunit alpha-2/delta-1 OS=Homo sapiens OX=9606 GN=CACNA2D1 PE=1 SV=3	Color2 [DarkGray]	1	4		19.3997	19.8604	20.8264	21.3982	20.3804	21.2377
	1.1276	2.71312	K.ISSLQTTEKN[+1702.581]DTVAGQGER.D	HexNAc(2)Hex(8)	N[+1703]	>sp|P06756|ITAV_HUMAN Integrin alpha-V OS=Homo sapiens OX=9606 GN=ITGAV PE=1 SV=2	Color2 [DarkGray]	1	4		19.4978	22.8155	22.8391	18.585	19.0958	19.3322
+	2.03367	-2.56887	K.ITDIEN[+1606.587]GSLANIPR.V	HexNAc(4)Hex(4)Fuc(1)	N[+1607]	>sp|Q9BXN1|ASPN_HUMAN Asporin OS=Homo sapiens OX=9606 GN=ASPN PE=1 SV=2	Color2 [DarkGray]	1	4		20.0376	18.2914	18.7346	21.8719	21.3506	21.5477
	0.796603	-3.94217	K.ITDIEN[+1768.640]GSLANIPR.V	HexNAc(4)Hex(5)Fuc(1)	N[+1769]	>sp|Q9BXN1|ASPN_HUMAN Asporin OS=Homo sapiens OX=9606 GN=ASPN PE=1 SV=2	Color2 [DarkGray]	1	4		18.6223	19.4173	20.2924	25.6064	25.6353	18.9168
	0.00438759	-0.0137361	K.ITDIEN[+1809.666]GSLANIPR.V	HexNAc(5)Hex(4)Fuc(1)	N[+1810]	>sp|Q9BXN1|ASPN_HUMAN Asporin OS=Homo sapiens OX=9606 GN=ASPN PE=1 SV=2	Color2 [DarkGray]	1	4		19.8363	20.7872	18.459	20.7502	20.1695	18.204
	0.860323	-2.86885	K.ITDIEN[+1897.682]GSLANIPR.V	HexNAc(4)Hex(4)Fuc(1)NeuAc(1)	N[+1898]	>sp|Q9BXN1|ASPN_HUMAN Asporin OS=Homo sapiens OX=9606 GN=ASPN PE=1 SV=2	Color2 [DarkGray]	1	4		19.2225	19.7201	19.4274	25.0669	22.1847	19.7249
+	4.14326	-7.53262	K.ITDIEN[+2059.735]GSLANIPR.V	HexNAc(4)Hex(5)Fuc(1)NeuAc(1)	N[+2060]	>sp|Q9BXN1|ASPN_HUMAN Asporin OS=Homo sapiens OX=9606 GN=ASPN PE=1 SV=2	Color2 [DarkGray]	1	4		17.9712	17.826	17.9584	25.6395	24.6066	26.1074
	0.373303	0.615747	K.ITDIEN[+2100.761]GSLANIPR.V	HexNAc(5)Hex(4)Fuc(1)NeuAc(1)	N[+2101]	>sp|Q9BXN1|ASPN_HUMAN Asporin OS=Homo sapiens OX=9606 GN=ASPN PE=1 SV=2	Color2 [DarkGray]	1	4		19.9169	19.7306	20.2028	18.237	20.5712	19.1949
	0.389862	1.08694	K.ITN[+2059.735]ISAVEMTPLPTC[+57.021]LQFNR.C	HexNAc(4)Hex(5)Fuc(1)NeuAc(1)	C[+57], N[+2060]	>sp|Q6UX71|PXDC2_HUMAN Plexin domain-containing protein 2 OS=Homo sapiens OX=9606 GN=PLXDC2 PE=1 SV=1	Color2 [DarkGray]	1	4		21.2936	22.2404	22.132	22.115	21.7526	18.5376
	0.488417	2.05336	K.ITN[+2350.830]ISAVEMTPLPTC[+57.021]LQFNR.C	HexNAc(4)Hex(5)Fuc(1)NeuAc(2)	C[+57], N[+2351]	>sp|Q6UX71|PXDC2_HUMAN Plexin domain-containing protein 2 OS=Homo sapiens OX=9606 GN=PLXDC2 PE=1 SV=1	Color2 [DarkGray]	1	4		19.6905	19.4535	24.8969	19.7579	18.4089	19.714
+	2.17742	-2.15246	K.ITN[+3147.115]ISAVEMTPLPTC[+57.021]LQFNR.C	HexNAc(6)Hex(11)Fuc(1)	C[+57], N[+3147]	>sp|Q6UX71|PXDC2_HUMAN Plexin domain-containing protein 2 OS=Homo sapiens OX=9606 GN=PLXDC2 PE=1 SV=1	Color2 [DarkGray]	1	4		18.8909	19.241	19.4765	22.115	20.9719	20.9788
	0.667717	1.61784	K.ITPNNN[+1694.603]GTYAC[+57.021]FVSNLATGR.N	HexNAc(3)Hex(4)Fuc(1)NeuAc(1)	C[+57], N[+1695]	>sp|P06731|CEAM5_HUMAN Carcinoembryonic antigen-related cell adhesion molecule 5 OS=Homo sapiens OX=9606 GN=CEACAM5 PE=1 SV=3	Color2 [DarkGray]	1	4		19.2437	20.7239	22.8622	19.9625	18.9146	19.0992
	0.505583	1.38737	K.ITPNNN[+2018.708]GTYAC[+57.021]FVSNLATGR.N	HexNAc(3)Hex(6)Fuc(1)NeuAc(1)	C[+57], N[+2019]	>sp|P06731|CEAM5_HUMAN Carcinoembryonic antigen-related cell adhesion molecule 5 OS=Homo sapiens OX=9606 GN=CEACAM5 PE=1 SV=3	Color2 [DarkGray]	1	4		20.0099	20.9706	23.8352	20.8086	19.6025	20.2424
	0.613524	0.722031	K.ITPNNN[+2059.735]GTYAC[+57.021]FVSNLATGR.N	HexNAc(4)Hex(5)Fuc(1)NeuAc(1)	C[+57], N[+2060]	>sp|P06731|CEAM5_HUMAN Carcinoembryonic antigen-related cell adhesion molecule 5 OS=Homo sapiens OX=9606 GN=CEACAM5 PE=1 SV=3	Color2 [DarkGray]	1	4		19.6999	19.7235	20.8773	19.9153	19.5193	18.7
	1.49437	2.53723	K.ITPNNN[+2350.830]GTYAC[+57.021]FVSNLATGR.N	HexNAc(4)Hex(5)Fuc(1)NeuAc(2)	C[+57], N[+2351]	>sp|P06731|CEAM5_HUMAN Carcinoembryonic antigen-related cell adhesion molecule 5 OS=Homo sapiens OX=9606 GN=CEACAM5 PE=1 SV=3	Color2 [DarkGray]	1	4		21.6345	22.0672	21.9365	20.8693	18.8134	18.3439
	0.83203	2.0391	K.ITPNNN[+2861.000]GTYAC[+57.021]FVSNLATGR.N	HexNAc(5)Hex(6)NeuAc(3)	C[+57], N[+2861]	>sp|P06731|CEAM5_HUMAN Carcinoembryonic antigen-related cell adhesion molecule 5 OS=Homo sapiens OX=9606 GN=CEACAM5 PE=1 SV=3	Color2 [DarkGray]	1	4		21.0687	23.1675	19.2589	19.1851	19.31	18.8827
	0.236087	0.30157	K.ITPNNN[+3007.058]GTYAC[+57.021]FVSNLATGR.N	HexNAc(5)Hex(6)Fuc(1)NeuAc(3)	C[+57], N[+3007]	>sp|P06731|CEAM5_HUMAN Carcinoembryonic antigen-related cell adhesion molecule 5 OS=Homo sapiens OX=9606 GN=CEACAM5 PE=1 SV=3	Color2 [DarkGray]	1	4		18.6933	19.9817	20.2456	19.5546	19.0513	19.41
	0.0776905	0.160138	K.IVAGSC[+57.021]VDC[+57.021]QALN[+1702.581]TSTC[+57.021]PPNSVK.L	HexNAc(2)Hex(8)	C[+57]*3, N[+1703]	>sp|Q9NY15|STAB1_HUMAN Stabilin-1 OS=Homo sapiens OX=9606 GN=STAB1 PE=1 SV=3	Color2 [DarkGray]	1	4		20.494	21.0228	18.6586	20.0637	19.9592	19.6721
	0.789023	2.15428	K.IYIPLN[+1702.581]K.T	HexNAc(2)Hex(8)	N[+1703]	>sp|Q92542|NICA_HUMAN Nicastrin OS=Homo sapiens OX=9606 GN=NCSTN PE=1 SV=2	Color2 [DarkGray]	1	4		20.4088	23.9709	23.8137	21.2738	20.8191	19.6377
	0.925965	1.32421	K.IYIPLN[+1864.634]K.T	HexNAc(2)Hex(9)	N[+1865]	>sp|Q92542|NICA_HUMAN Nicastrin OS=Homo sapiens OX=9606 GN=NCSTN PE=1 SV=2	Color2 [DarkGray]	1	4		23.3826	22.378	22.7475	22.0514	22.1711	20.313
+	4.3808	-6.00754	K.IYVLDGTQN[+1768.640]DTAFVFPR.L	HexNAc(4)Hex(5)Fuc(1)	N[+1769]	>sp|Q9NRN5|OLFL3_HUMAN Olfactomedin-like protein 3 OS=Homo sapiens OX=9606 GN=OLFML3 PE=2 SV=1	Color2 [DarkGray]	1	4		18.4716	19.0599	19.3418	25.2593	24.658	24.9786
+	5.64011	-7.65955	K.IYVLDGTQN[+2059.735]DTAFVFPR.L	HexNAc(4)Hex(5)Fuc(1)NeuAc(1)	N[+2060]	>sp|Q9NRN5|OLFL3_HUMAN Olfactomedin-like protein 3 OS=Homo sapiens OX=9606 GN=OLFML3 PE=2 SV=1	Color2 [DarkGray]	1	4		18.2996	18.0747	18.5747	26.042	25.7356	26.1502
	1.93255	-2.16841	K.IYVLDGTQN[+2133.772]DTAFVFPR.L	HexNAc(5)Hex(6)Fuc(1)	N[+2134]	>sp|Q9NRN5|OLFL3_HUMAN Olfactomedin-like protein 3 OS=Homo sapiens OX=9606 GN=OLFML3 PE=2 SV=1	Color2 [DarkGray]	1	4		18.9811	19.4694	18.5787	21.7296	21.4512	20.3536
	0.381054	-1.65496	K.IYVLDGTQN[+2350.830]DTAFVFPR.L	HexNAc(4)Hex(5)Fuc(1)NeuAc(2)	N[+2351]	>sp|Q9NRN5|OLFL3_HUMAN Olfactomedin-like protein 3 OS=Homo sapiens OX=9606 GN=OLFML3 PE=2 SV=1	Color2 [DarkGray]	1	4		19.9617	19.5945	19.8716	24.9567	20.6185	18.8176
	0.178609	-0.745593	K.IYVLDGTQN[+2424.867]DTAFVFPR.L	HexNAc(5)Hex(6)Fuc(1)NeuAc(1)	N[+2425]	>sp|Q9NRN5|OLFL3_HUMAN Olfactomedin-like protein 3 OS=Homo sapiens OX=9606 GN=OLFML3 PE=2 SV=1	Color2 [DarkGray]	1	4		19.7874	19.2908	20.3	19.0671	18.8926	23.6552
+	2.06862	3.16528	K.KDAQQDYHLEYAMEN[+1216.423]STHTIIEFTR.E	HexNAc(2)Hex(5)	N[+1216]	>sp|Q6UVY6|MOXD1_HUMAN DBH-like monooxygenase protein 1 OS=Homo sapiens OX=9606 GN=MOXD1 PE=1 SV=1	Color2 [DarkGray]	1	4		23.3953	22.0215	23.2992	19.873	18.8407	20.5064
	0.943145	1.94161	K.KDFEDLYTPVN[+2350.830]GSIVIVR.A	HexNAc(4)Hex(5)Fuc(1)NeuAc(2)	N[+2351]	>sp|P02786|TFR1_HUMAN Transferrin receptor protein 1 OS=Homo sapiens OX=9606 GN=TFRC PE=1 SV=2	Color2 [DarkGray]	1	4		21.5613	19.7667	19.4548	18.0263	17.272	19.6596
	0.248096	-0.565399	K.KDGTVTAGN[+1548.545]ASGVADGAGAVIIASEDAVK.K	HexNAc(3)Hex(4)NeuAc(1)	N[+1549]	>sp|P42765|THIM_HUMAN 3-ketoacyl-CoA thiolase, mitochondrial OS=Homo sapiens OX=9606 GN=ACAA2 PE=1 SV=2	Color2 [DarkGray]	1	4		18.6371	18.997	18.9659	19.7354	20.8077	17.7531
	0.166582	0.830381	K.KDTC[+57.021]TQEC[+57.021]SYFN[+1378.476]ITK.V	HexNAc(2)Hex(6)	C[+57]*2, N[+1378]	>sp|P05556|ITB1_HUMAN Integrin beta-1 OS=Homo sapiens OX=9606 GN=ITGB1 PE=1 SV=2	Color2 [DarkGray]	1	4		23.4615	18.3574	22.768	22.499	19.0917	20.5051
	0.350772	1.42763	K.KDTC[+57.021]TQEC[+57.021]SYFN[+1540.529]ITK.V	HexNAc(2)Hex(7)	C[+57]*2, N[+1541]	>sp|P05556|ITB1_HUMAN Integrin beta-1 OS=Homo sapiens OX=9606 GN=ITGB1 PE=1 SV=2	Color2 [DarkGray]	1	4		18.7914	19.0522	23.9066	18.593	19.6209	19.2534
	0.12599	0.174995	K.KDTC[+57.021]TQEC[+57.021]SYFN[+1702.581]ITK.V	HexNAc(2)Hex(8)	C[+57]*2, N[+1703]	>sp|P05556|ITB1_HUMAN Integrin beta-1 OS=Homo sapiens OX=9606 GN=ITGB1 PE=1 SV=2	Color2 [DarkGray]	1	4		19.2081	20.0282	20.321	20.2401	18.942	19.8503
	0.507721	-1.93856	K.KDTC[+57.021]TQEC[+57.021]SYFN[+1768.640]ITK.V	HexNAc(4)Hex(5)Fuc(1)	C[+57]*2, N[+1769]	>sp|P05556|ITB1_HUMAN Integrin beta-1 OS=Homo sapiens OX=9606 GN=ITGB1 PE=1 SV=2	Color2 [DarkGray]	1	4		18.6711	20.6208	19.9684	19.0521	24.4851	21.5388
	0.477183	0.47893	K.KDVN[+1864.634]YTQIVVDR.T	HexNAc(2)Hex(9)	N[+1865]	>sp|Q92854|SEM4D_HUMAN Semaphorin-4D OS=Homo sapiens OX=9606 GN=SEMA4D PE=1 SV=1	Color2 [DarkGray]	1	4		20.1416	20.1281	19.0184	19.7231	19.1586	18.9695
	0.00686986	0.0342305	K.KFN[+1702.581]STQIAAMAPEHEEPR.I	HexNAc(2)Hex(8)	N[+1703]	>sp|Q4G148|GXLT1_HUMAN Glucoside xylosyltransferase 1 OS=Homo sapiens OX=9606 GN=GXYLT1 PE=1 SV=2	Color2 [DarkGray]	1	4		19.0938	17.6318	22.8187	19.8758	18.8496	20.7162
	0.197735	-0.450973	K.KFN[+1864.634]STQIAAMAPEHEEPR.I	HexNAc(2)Hex(9)	N[+1865]	>sp|Q4G148|GXLT1_HUMAN Glucoside xylosyltransferase 1 OS=Homo sapiens OX=9606 GN=GXYLT1 PE=1 SV=2	Color2 [DarkGray]	1	4		18.8364	20.244	17.5377	18.5332	19.8058	19.6321
	0.491466	2.11912	K.KGN[+2059.735]TTLNSFVIPSESDVPTHC[+57.021]PSQWWPYAGHC[+57.021]YK.I	HexNAc(4)Hex(5)Fuc(1)NeuAc(1)	C[+57]*2, N[+2060]	>sp|P22897|MRC1_HUMAN Macrophage mannose receptor 1 OS=Homo sapiens OX=9606 GN=MRC1 PE=1 SV=1	Color2 [DarkGray]	1	4		20.856	26.195	24.933	22.6912	22.987	19.9486
	1.36383	-3.33881	K.KIDN[+2059.735]ISLTVNDVR.N	HexNAc(4)Hex(5)Fuc(1)NeuAc(1)	N[+2060]	>sp|Q13201|MMRN1_HUMAN Multimerin-1 OS=Homo sapiens OX=9606 GN=MMRN1 PE=1 SV=3	Color2 [DarkGray]	1	4		16.9412	19.4784	18.8099	23.2088	21.7902	20.2469
	1.02259	-1.63822	K.KIRTLLN[+2935.037]ASC[+57.021]DNMLMGIK.S	HexNAc(6)Hex(7)NeuAc(2)	C[+57], N[+2935]	>sp|Q6UWY5|OLFL1_HUMAN Olfactomedin-like protein 1 OS=Homo sapiens OX=9606 GN=OLFML1 PE=1 SV=2	Color2 [DarkGray]	1	4		19.1822	19.0993	19.0787	21.927	19.3557	20.9922
	0.265119	-1.77132	K.KKEDALN[+2204.772]ETR.E	HexNAc(4)Hex(5)NeuAc(2)	N[+2205]	>sp|P10909|CLUS_HUMAN Clusterin OS=Homo sapiens OX=9606 GN=CLU PE=1 SV=1	Color2 [DarkGray]	1	4		19.4945	18.973	20.3401	26.5995	18.1259	19.3962
	0.584204	3.76972	K.KKEDALN[+2861.000]ETR.E	HexNAc(5)Hex(6)NeuAc(3)	N[+2861]	>sp|P10909|CLUS_HUMAN Clusterin OS=Homo sapiens OX=9606 GN=CLU PE=1 SV=1	Color2 [DarkGray]	1	4		19.2343	27.0367	27.8686	22.6236	20.3375	19.8693
	0.924304	-1.62424	K.KKEDALN[+3007.058]ETR.E	HexNAc(5)Hex(6)Fuc(1)NeuAc(3)	N[+3007]	>sp|P10909|CLUS_HUMAN Clusterin OS=Homo sapiens OX=9606 GN=CLU PE=1 SV=1	Color2 [DarkGray]	1	4		18.7813	19.2489	18.4899	22.0268	19.8939	19.472
+	4.07641	-6.23792	K.KKN[+1216.423]ITLDC[+57.021]AR.G	HexNAc(2)Hex(5)	C[+57], N[+1216]	>sp|Q13683|ITA7_HUMAN Integrin alpha-7 OS=Homo sapiens OX=9606 GN=ITGA7 PE=1 SV=3	Color2 [DarkGray]	1	4		19.4363	18.1695	19.1454	25.1402	25.1244	25.2004
	0.813691	-2.65096	K.KKPN[+1768.640]ATAEPTPPDR.W	HexNAc(4)Hex(5)Fuc(1)	N[+1769]	>sp|Q9UBG0|MRC2_HUMAN C-type mannose receptor 2 OS=Homo sapiens OX=9606 GN=MRC2 PE=1 SV=2	Color2 [DarkGray]	1	4		20.8543	18.5416	19.638	22.8798	24.346	19.761
	0.568266	-1.76337	K.KKPN[+2059.735]ATAEPTPPDR.W	HexNAc(4)Hex(5)Fuc(1)NeuAc(1)	N[+2060]	>sp|Q9UBG0|MRC2_HUMAN C-type mannose receptor 2 OS=Homo sapiens OX=9606 GN=MRC2 PE=1 SV=2	Color2 [DarkGray]	1	4		18.6937	20.0476	18.8428	20.9381	18.6974	23.2387
	0.281316	1.41049	K.KKPN[+2350.830]ATAEPTPPDR.W	HexNAc(4)Hex(5)Fuc(1)NeuAc(2)	N[+2351]	>sp|Q9UBG0|MRC2_HUMAN C-type mannose receptor 2 OS=Homo sapiens OX=9606 GN=MRC2 PE=1 SV=2	Color2 [DarkGray]	1	4		23.6866	21.4774	22.7096	19.6824	18.9401	25.0196
+	2.56094	-2.84565	K.KLHINHNN[+1403.507]LTESVGPLPK.S	HexNAc(3)Hex(4)Fuc(1)	N[+1404]	>sp|P51884|LUM_HUMAN Lumican OS=Homo sapiens OX=9606 GN=LUM PE=1 SV=2	Color2 [DarkGray]	1	4		19.4779	19.9543	20.362	23.2829	22.9388	22.1095
	0.394968	-0.998706	K.KLHINHNN[+1548.545]LTESVGPLPK.S	HexNAc(3)Hex(4)NeuAc(1)	N[+1549]	>sp|P51884|LUM_HUMAN Lumican OS=Homo sapiens OX=9606 GN=LUM PE=1 SV=2	Color2 [DarkGray]	1	4		19.9182	18.7423	18.6898	22.0805	18.9215	19.3444
	0.544334	-0.920333	K.KLHINHNN[+1565.560]LTESVGPLPK.S	HexNAc(3)Hex(5)Fuc(1)	N[+1566]	>sp|P51884|LUM_HUMAN Lumican OS=Homo sapiens OX=9606 GN=LUM PE=1 SV=2	Color2 [DarkGray]	1	4		20.3104	20.8237	18.4843	20.6897	21.2389	20.4508
	0.193441	-0.781815	K.KLHINHNN[+1606.587]LTESVGPLPK.S	HexNAc(4)Hex(4)Fuc(1)	N[+1607]	>sp|P51884|LUM_HUMAN Lumican OS=Homo sapiens OX=9606 GN=LUM PE=1 SV=2	Color2 [DarkGray]	1	4		19.1146	20.5705	19.8946	23.6249	19.2198	19.0805
+	3.10502	-4.21696	K.KLHINHNN[+1622.582]LTESVGPLPK.S	HexNAc(4)Hex(5)	N[+1623]	>sp|P51884|LUM_HUMAN Lumican OS=Homo sapiens OX=9606 GN=LUM PE=1 SV=2	Color2 [DarkGray]	1	4		20.0553	18.5	19.0734	23.2816	23.5009	23.497
	0.487044	-2.04144	K.KLHINHNN[+1694.603]LTESVGPLPK.S	HexNAc(3)Hex(4)Fuc(1)NeuAc(1)	N[+1695]	>sp|P51884|LUM_HUMAN Lumican OS=Homo sapiens OX=9606 GN=LUM PE=1 SV=2	Color2 [DarkGray]	1	4		19.3543	20.2462	19.5406	24.7712	21.9622	18.5321
+	2.2291	3.18546	K.KLHINHNN[+1702.581]LTESVGPLPK.S	HexNAc(2)Hex(8)	N[+1703]	>sp|P51884|LUM_HUMAN Lumican OS=Homo sapiens OX=9606 GN=LUM PE=1 SV=2	Color2 [DarkGray]	1	4		22.672	24.3914	22.8056	20.1158	20.4858	19.711
	0.31771	0.196061	K.KLHINHNN[+1710.598]LTESVGPLPK.S	HexNAc(3)Hex(5)NeuAc(1)	N[+1711]	>sp|P51884|LUM_HUMAN Lumican OS=Homo sapiens OX=9606 GN=LUM PE=1 SV=2	Color2 [DarkGray]	1	4		19.3871	19.2595	19.6335	19.1256	19.6668	18.8995
+	4.02369	-4.40076	K.KLHINHNN[+1768.640]LTESVGPLPK.S	HexNAc(4)Hex(5)Fuc(1)	N[+1769]	>sp|P51884|LUM_HUMAN Lumican OS=Homo sapiens OX=9606 GN=LUM PE=1 SV=2	Color2 [DarkGray]	1	4		25.9557	26.0867	26.1684	30.2981	31.0047	30.1103
	0.437991	-1.75515	K.KLHINHNN[+1809.666]LTESVGPLPK.S	HexNAc(5)Hex(4)Fuc(1)	N[+1810]	>sp|P51884|LUM_HUMAN Lumican OS=Homo sapiens OX=9606 GN=LUM PE=1 SV=2	Color2 [DarkGray]	1	4		18.827	20.1943	19.8486	24.3526	18.5811	21.2017
+	2.09379	5.9113	K.KLHINHNN[+1864.634]LTESVGPLPK.S	HexNAc(2)Hex(9)	N[+1865]	>sp|P51884|LUM_HUMAN Lumican OS=Homo sapiens OX=9606 GN=LUM PE=1 SV=2	Color2 [DarkGray]	1	4		26.3654	27.1204	26.0611	22.4558	20.9041	18.4531
	0.0371089	-0.0985088	K.KLHINHNN[+1897.682]LTESVGPLPK.S	HexNAc(4)Hex(4)Fuc(1)NeuAc(1)	N[+1898]	>sp|P51884|LUM_HUMAN Lumican OS=Homo sapiens OX=9606 GN=LUM PE=1 SV=2	Color2 [DarkGray]	1	4		20.3858	20.7866	19.6541	19.1667	19.9745	21.9809
+	3.53465	-7.07544	K.KLHINHNN[+1913.677]LTESVGPLPK.S	HexNAc(4)Hex(5)NeuAc(1)	N[+1914]	>sp|P51884|LUM_HUMAN Lumican OS=Homo sapiens OX=9606 GN=LUM PE=1 SV=2	Color2 [DarkGray]	1	4		19.493	18.5091	19.9187	25.8853	27.2347	26.0271
	0.971533	-4.6633	K.KLHINHNN[+1930.692]LTESVGPLPK.S	HexNAc(4)Hex(6)Fuc(1)	N[+1931]	>sp|P51884|LUM_HUMAN Lumican OS=Homo sapiens OX=9606 GN=LUM PE=1 SV=2	Color2 [DarkGray]	1	4		18.5421	19.0136	20.4326	26.2345	26.1018	19.6419
	0.508801	1.32018	K.KLHINHNN[+1971.719]LTESVGPLPK.S	HexNAc(5)Hex(5)Fuc(1)	N[+1972]	>sp|P51884|LUM_HUMAN Lumican OS=Homo sapiens OX=9606 GN=LUM PE=1 SV=2	Color2 [DarkGray]	1	4		25.9473	26.4859	26.9623	26.6215	25.8139	22.9996
	0.207786	-1.46749	K.KLHINHNN[+1987.714]LTESVGPLPK.S	HexNAc(5)Hex(6)	N[+1988]	>sp|P51884|LUM_HUMAN Lumican OS=Homo sapiens OX=9606 GN=LUM PE=1 SV=2	Color2 [DarkGray]	1	4		19.3665	20.0856	19.1632	26.3974	18.9167	17.7037
+	2.54635	-2.90923	K.KLHINHNN[+2059.735]LTESVGPLPK.S	HexNAc(4)Hex(5)Fuc(1)NeuAc(1)	N[+2060]	>sp|P51884|LUM_HUMAN Lumican OS=Homo sapiens OX=9606 GN=LUM PE=1 SV=2	Color2 [DarkGray]	1	4		30.2768	28.7934	29.4374	32.3943	32.6255	32.2154
	1.34933	-3.92884	K.KLHINHNN[+2100.761]LTESVGPLPK.S	HexNAc(5)Hex(4)Fuc(1)NeuAc(1)	N[+2101]	>sp|P51884|LUM_HUMAN Lumican OS=Homo sapiens OX=9606 GN=LUM PE=1 SV=2	Color2 [DarkGray]	1	4		18.5725	17.9203	18.1631	24.7661	20.2834	21.393
+	4.53941	-9.85697	K.KLHINHNN[+2133.772]LTESVGPLPK.S	HexNAc(5)Hex(6)Fuc(1)	N[+2134]	>sp|P51884|LUM_HUMAN Lumican OS=Homo sapiens OX=9606 GN=LUM PE=1 SV=2	Color2 [DarkGray]	1	4		20.2318	18.8896	19.5435	29.67	29.6621	28.9037
	1.08126	-2.46102	K.KLHINHNN[+2204.772]LTESVGPLPK.S	HexNAc(4)Hex(5)NeuAc(2)	N[+2205]	>sp|P51884|LUM_HUMAN Lumican OS=Homo sapiens OX=9606 GN=LUM PE=1 SV=2	Color2 [DarkGray]	1	4		20.0433	20.163	18.5367	23.4394	22.4151	20.2716
	0.603258	-2.91751	K.KLHINHNN[+2221.788]LTESVGPLPK.S	HexNAc(4)Hex(6)Fuc(1)NeuAc(1)	N[+2222]	>sp|P51884|LUM_HUMAN Lumican OS=Homo sapiens OX=9606 GN=LUM PE=1 SV=2	Color2 [DarkGray]	1	4		21.0498	19.4153	20.0632	23.0188	26.7913	19.4707
+	2.63516	2.96471	K.KLHINHNN[+2262.814]LTESVGPLPK.S	HexNAc(5)Hex(5)Fuc(1)NeuAc(1)	N[+2263]	>sp|P51884|LUM_HUMAN Lumican OS=Homo sapiens OX=9606 GN=LUM PE=1 SV=2	Color2 [DarkGray]	1	4		24.759	25.7699	25.1407	22.8792	21.8797	22.0166
+	3.55556	-7.35333	K.KLHINHNN[+2278.809]LTESVGPLPK.S	HexNAc(5)Hex(6)NeuAc(1)	N[+2279]	>sp|P51884|LUM_HUMAN Lumican OS=Homo sapiens OX=9606 GN=LUM PE=1 SV=2	Color2 [DarkGray]	1	4		18.9935	19.8854	18.5202	26.3738	27.3428	25.7425
	0.90765	-5.42019	K.KLHINHNN[+2313.873]LTESVGPLPK.S	HexNAc(9)Hex(3)	N[+2314]	>sp|P51884|LUM_HUMAN Lumican OS=Homo sapiens OX=9606 GN=LUM PE=1 SV=2	Color2 [DarkGray]	1	4		19.0687	20.7658	18.1787	27.5039	27.3748	19.395
	0.281063	-1.14121	K.KLHINHNN[+2336.851]LTESVGPLPK.S	HexNAc(6)Hex(6)Fuc(1)	N[+2337]	>sp|P51884|LUM_HUMAN Lumican OS=Homo sapiens OX=9606 GN=LUM PE=1 SV=2	Color2 [DarkGray]	1	4		19.2683	19.8964	19.5206	19.1524	23.9506	19.006
	1.67953	-2.00361	K.KLHINHNN[+2350.830]LTESVGPLPK.S	HexNAc(4)Hex(5)Fuc(1)NeuAc(2)	N[+2351]	>sp|P51884|LUM_HUMAN Lumican OS=Homo sapiens OX=9606 GN=LUM PE=1 SV=2	Color2 [DarkGray]	1	4		29.141	30.1253	28.6928	30.7655	31.9361	31.2682
	0.303831	-0.729284	K.KLHINHNN[+2352.846]LTESVGPLPK.S	HexNAc(6)Hex(7)	N[+2353]	>sp|P51884|LUM_HUMAN Lumican OS=Homo sapiens OX=9606 GN=LUM PE=1 SV=2	Color2 [DarkGray]	1	4		19.5451	18.0394	20.6603	21.2414	19.1166	20.0746
	1.90828	-8.2484	K.KLHINHNN[+2407.852]LTESVGPLPK.S	HexNAc(5)Hex(5)NeuAc(2)	N[+2408]	>sp|P51884|LUM_HUMAN Lumican OS=Homo sapiens OX=9606 GN=LUM PE=1 SV=2	Color2 [DarkGray]	1	4		23.8754	18.233	18.2804	27.6932	28.8299	28.611
+	2.41207	-3.8015	K.KLHINHNN[+2424.867]LTESVGPLPK.S	HexNAc(5)Hex(6)Fuc(1)NeuAc(1)	N[+2425]	>sp|P51884|LUM_HUMAN Lumican OS=Homo sapiens OX=9606 GN=LUM PE=1 SV=2	Color2 [DarkGray]	1	4		27.0066	28.1979	29.0802	31.8081	31.6032	32.2779
	0.787626	-3.89785	K.KLHINHNN[+2498.904]LTESVGPLPK.S	HexNAc(6)Hex(7)Fuc(1)	N[+2499]	>sp|P51884|LUM_HUMAN Lumican OS=Homo sapiens OX=9606 GN=LUM PE=1 SV=2	Color2 [DarkGray]	1	4		19.107	20.0537	19.2189	27.3703	23.1693	19.5336
	0.157823	-0.166686	K.KLHINHNN[+2569.905]LTESVGPLPK.S	HexNAc(5)Hex(6)NeuAc(2)	N[+2570]	>sp|P51884|LUM_HUMAN Lumican OS=Homo sapiens OX=9606 GN=LUM PE=1 SV=2	Color2 [DarkGray]	1	4		20.3727	19.8809	19.6497	20.5532	19.4754	20.3746
+	3.871	-3.09224	K.KLHINHNN[+2715.963]LTESVGPLPK.S	HexNAc(5)Hex(6)Fuc(1)NeuAc(2)	N[+2716]	>sp|P51884|LUM_HUMAN Lumican OS=Homo sapiens OX=9606 GN=LUM PE=1 SV=2	Color2 [DarkGray]	1	4		25.5073	26.0154	25.9138	29.1185	28.6202	28.9745
	1.91259	-7.71482	K.KLHINHNN[+2789.999]LTESVGPLPK.S	HexNAc(6)Hex(7)Fuc(1)NeuAc(1)	N[+2790]	>sp|P51884|LUM_HUMAN Lumican OS=Homo sapiens OX=9606 GN=LUM PE=1 SV=2	Color2 [DarkGray]	1	4		18.4369	19.9378	19.3097	23.5018	28.5226	28.8045
	0.735786	-1.31771	K.KLHINHNN[+2805.994]LTESVGPLPK.S	HexNAc(6)Hex(8)NeuAc(1)	N[+2806]	>sp|P51884|LUM_HUMAN Lumican OS=Homo sapiens OX=9606 GN=LUM PE=1 SV=2	Color2 [DarkGray]	1	4		20.1665	18.4283	19.1757	20.1984	19.6876	21.8376
	0.189711	-1.64734	K.KLHINHNN[+3081.095]LTESVGPLPK.S	HexNAc(6)Hex(7)Fuc(1)NeuAc(2)	N[+3081]	>sp|P51884|LUM_HUMAN Lumican OS=Homo sapiens OX=9606 GN=LUM PE=1 SV=2	Color2 [DarkGray]	1	4		24.2204	24.7041	24.4241	29.1991	29.6302	19.4614
	0.867278	-3.98835	K.KLHINHNN[+3155.132]LTESVGPLPK.S	HexNAc(7)Hex(8)Fuc(1)NeuAc(1)	N[+3155]	>sp|P51884|LUM_HUMAN Lumican OS=Homo sapiens OX=9606 GN=LUM PE=1 SV=2	Color2 [DarkGray]	1	4		18.5225	20.5026	20.7556	24.451	20.1802	27.1146
	1.41411	-3.82592	K.KLHINHNN[+3446.227]LTESVGPLPK.S	HexNAc(7)Hex(8)Fuc(1)NeuAc(2)	N[+3446]	>sp|P51884|LUM_HUMAN Lumican OS=Homo sapiens OX=9606 GN=LUM PE=1 SV=2	Color2 [DarkGray]	1	4		20.0802	19.0134	18.3432	23.6063	20.7323	24.5759
	0.492717	1.61574	K.KLN[+1548.545]YTLSQGHR.V	HexNAc(3)Hex(4)NeuAc(1)	N[+1549]	>sp|P15144|AMPN_HUMAN Aminopeptidase N OS=Homo sapiens OX=9606 GN=ANPEP PE=1 SV=4	Color2 [DarkGray]	1	4		22.3907	22.4916	18.1731	19.6172	19.146	19.4449
+	2.60923	4.44037	K.KLN[+1622.582]YTLSQGHR.V	HexNAc(4)Hex(5)	N[+1623]	>sp|P15144|AMPN_HUMAN Aminopeptidase N OS=Homo sapiens OX=9606 GN=ANPEP PE=1 SV=4	Color2 [DarkGray]	1	4		23.8488	22.7595	24.1951	19.2398	18.274	19.9684
	0.386296	1.26309	K.KLN[+1872.651]YTLSQGHR.V	HexNAc(3)Hex(6)NeuAc(1)	N[+1873]	>sp|P15144|AMPN_HUMAN Aminopeptidase N OS=Homo sapiens OX=9606 GN=ANPEP PE=1 SV=4	Color2 [DarkGray]	1	4		18.5645	23.2333	20.9266	19.2671	19.4724	20.1957
+	2.73556	4.81014	K.KLN[+1913.677]YTLSQGHR.V	HexNAc(4)Hex(5)NeuAc(1)	N[+1914]	>sp|P15144|AMPN_HUMAN Aminopeptidase N OS=Homo sapiens OX=9606 GN=ANPEP PE=1 SV=4	Color2 [DarkGray]	1	4		24.9743	24.2524	22.9351	18.9654	19.7863	18.9797
	0.278021	1.44856	K.KLN[+2204.772]YTLSQGHR.V	HexNAc(4)Hex(5)NeuAc(2)	N[+2205]	>sp|P15144|AMPN_HUMAN Aminopeptidase N OS=Homo sapiens OX=9606 GN=ANPEP PE=1 SV=4	Color2 [DarkGray]	1	4		19.6978	18.1362	24.9282	19.5597	18.7223	20.1345
	0.394975	-1.38428	K.KLNN[+1913.677]LTFLYLDHNALESVPLNLPESLR.V	HexNAc(4)Hex(5)NeuAc(1)	N[+1914]	>sp|P20774|MIME_HUMAN Mimecan OS=Homo sapiens OX=9606 GN=OGN PE=1 SV=1	Color2 [DarkGray]	1	4		19.2214	19.4325	19.2926	18.5364	23.5292	20.0338
	0.398915	-1.32535	K.KLNN[+2059.735]LTFLYLDHNALESVPLNLPESLR.V	HexNAc(4)Hex(5)Fuc(1)NeuAc(1)	N[+2060]	>sp|P20774|MIME_HUMAN Mimecan OS=Homo sapiens OX=9606 GN=OGN PE=1 SV=1	Color2 [DarkGray]	1	4		19.3564	17.6535	20.2766	19.3848	22.7693	19.1085
	0.436487	-0.96255	K.KLNN[+2204.772]LTFLYLDHNALESVPLNLPESLR.V	HexNAc(4)Hex(5)NeuAc(2)	N[+2205]	>sp|P20774|MIME_HUMAN Mimecan OS=Homo sapiens OX=9606 GN=OGN PE=1 SV=1	Color2 [DarkGray]	1	4		17.7457	20.3921	19.0009	19.1517	21.0505	19.8242
	0.0018226	0.00143878	K.KN[+1378.476]STAYFR.G	HexNAc(2)Hex(6)	N[+1378]	>sp|Q8NBL1|PGLT1_HUMAN Protein O-glucosyltransferase 1 OS=Homo sapiens OX=9606 GN=POGLUT1 PE=1 SV=1	Color2 [DarkGray]	1	4		19.1451	19.8114	19.5467	19.4715	19.807	19.2204
	0.388459	1.02459	K.KN[+1702.581]STAYFR.G	HexNAc(2)Hex(8)	N[+1703]	>sp|Q8NBL1|PGLT1_HUMAN Protein O-glucosyltransferase 1 OS=Homo sapiens OX=9606 GN=POGLUT1 PE=1 SV=1	Color2 [DarkGray]	1	4		19.6626	18.8412	22.5074	19.2369	19.3162	19.3842
+	3.27952	5.56048	K.KPQDQGLN[+1702.581]HTC[+57.021]NYYLQPEEDVTIGVWHTVPAVWWK.N	HexNAc(2)Hex(8)	C[+57], N[+1703]	>sp|Q8N2K0|ABD12_HUMAN Lysophosphatidylserine lipase ABHD12 OS=Homo sapiens OX=9606 GN=ABHD12 PE=1 SV=2	Color2 [DarkGray]	1	4		25.6147	24.9447	24.9781	18.7657	20.5009	19.5895
	0.109153	0.189603	K.KTFNLN[+1622.582]TTEVEPC[+57.021]R.R	HexNAc(4)Hex(5)	C[+57], N[+1623]	>sp|Q16787|LAMA3_HUMAN Laminin subunit alpha-3 OS=Homo sapiens OX=9606 GN=LAMA3 PE=1 SV=2	Color2 [DarkGray]	1	4		20.3099	19.1966	20.0295	20.6947	18.9408	19.3316
	0.4137	0.94337	K.KWGHN[+1216.423]ITEFQQR.F	HexNAc(2)Hex(5)	N[+1216]	>sp|Q96HE7|ERO1A_HUMAN ERO1-like protein alpha OS=Homo sapiens OX=9606 GN=ERO1A PE=1 SV=2	Color2 [DarkGray]	1	4		20.3372	19.3202	22.2578	18.823	20.2912	19.9709
+	2.67323	6.51007	K.KWGHN[+1378.476]ITEFQQR.F	HexNAc(2)Hex(6)	N[+1378]	>sp|Q96HE7|ERO1A_HUMAN ERO1-like protein alpha OS=Homo sapiens OX=9606 GN=ERO1A PE=1 SV=2	Color2 [DarkGray]	1	4		26.7824	25.3624	27.1523	20.8014	20.5209	18.4445
	0.685629	2.54622	K.KWGHN[+1702.581]ITEFQQR.F	HexNAc(2)Hex(8)	N[+1703]	>sp|Q96HE7|ERO1A_HUMAN ERO1-like protein alpha OS=Homo sapiens OX=9606 GN=ERO1A PE=1 SV=2	Color2 [DarkGray]	1	4		19.5375	20.5317	24.6511	17.7567	19.6715	19.6534
+	2.88138	3.50697	K.KWGHN[+1864.634]ITEFQQR.F	HexNAc(2)Hex(9)	N[+1865]	>sp|Q96HE7|ERO1A_HUMAN ERO1-like protein alpha OS=Homo sapiens OX=9606 GN=ERO1A PE=1 SV=2	Color2 [DarkGray]	1	4		23.5534	23.3135	23.1537	19.1668	19.7184	20.6144
	0.0706346	0.0551173	K.KWRVENQEN[+2627.947]VSNLVIEDTELK.Q	HexNAc(6)Hex(6)Fuc(1)NeuAc(1)	N[+2628]	>sp|Q01518|CAP1_HUMAN Adenylyl cyclase-associated protein 1 OS=Homo sapiens OX=9606 GN=CAP1 PE=1 SV=5	Color2 [DarkGray]	1	4		19.5005	19.2761	19.9302	19.8643	19.1932	19.484
	1.18095	1.17277	K.LC[+57.021]QGLGLN[+1540.529]LTK.F	HexNAc(2)Hex(7)	C[+57], N[+1541]	>sp|Q96RQ9|OXLA_HUMAN L-amino-acid oxidase OS=Homo sapiens OX=9606 GN=IL4I1 PE=1 SV=1	Color2 [DarkGray]	1	4		19.9653	20.2407	21.1749	19.5552	19.5989	18.7084
+	2.30438	-3.92548	K.LDAFFALEGFPTEPN[+2059.735]SSSR.A	HexNAc(4)Hex(5)Fuc(1)NeuAc(1)	N[+2060]	>sp|P08294|SODE_HUMAN Extracellular superoxide dismutase [Cu-Zn] OS=Homo sapiens OX=9606 GN=SOD3 PE=1 SV=2	Color2 [DarkGray]	1	4		19.344	19.6587	19.4152	23.8666	24.2941	22.0337
	0.495872	-2.55595	K.LDAFFALEGFPTEPN[+2350.830]SSSR.A	HexNAc(4)Hex(5)Fuc(1)NeuAc(2)	N[+2351]	>sp|P08294|SODE_HUMAN Extracellular superoxide dismutase [Cu-Zn] OS=Homo sapiens OX=9606 GN=SOD3 PE=1 SV=2	Color2 [DarkGray]	1	4		18.5204	19.0684	19.8993	18.8492	20.2347	26.072
	2.17095	-1.13897	K.LDAPTNLQFVN[+1403.507]ETDSTVLVR.W	HexNAc(3)Hex(4)Fuc(1)	N[+1404]	>sp|P02751|FINC_HUMAN Fibronectin OS=Homo sapiens OX=9606 GN=FN1 PE=1 SV=5	Color2 [DarkGray]	1	4		19.1058	19.4968	19.4139	20.8497	20.3163	20.2675
+	2.12528	-4.20219	K.LDAPTNLQFVN[+1606.587]ETDSTVLVR.W	HexNAc(4)Hex(4)Fuc(1)	N[+1607]	>sp|P02751|FINC_HUMAN Fibronectin OS=Homo sapiens OX=9606 GN=FN1 PE=1 SV=5	Color2 [DarkGray]	1	4		19.7546	19.0564	19.9592	24.758	22.2157	24.403
+	2.52696	-3.77084	K.LDAPTNLQFVN[+1622.582]ETDSTVLVR.W	HexNAc(4)Hex(5)	N[+1623]	>sp|P02751|FINC_HUMAN Fibronectin OS=Homo sapiens OX=9606 GN=FN1 PE=1 SV=5	Color2 [DarkGray]	1	4		19.5592	17.6438	18.9581	22.7201	22.5384	22.2151
	0.585567	1.17387	K.LDAPTNLQFVN[+1702.581]ETDSTVLVR.W	HexNAc(2)Hex(8)	N[+1703]	>sp|P02751|FINC_HUMAN Fibronectin OS=Homo sapiens OX=9606 GN=FN1 PE=1 SV=5	Color2 [DarkGray]	1	4		21.4646	23.3074	21.9414	22.4345	20.1011	20.6562
	0.271638	-2.1142	K.LDAPTNLQFVN[+1768.640]ETDSTVLVR.W	HexNAc(4)Hex(5)Fuc(1)	N[+1769]	>sp|P02751|FINC_HUMAN Fibronectin OS=Homo sapiens OX=9606 GN=FN1 PE=1 SV=5	Color2 [DarkGray]	1	4		28.4764	21.1531	28.6555	24.4502	30.5944	29.583
	0.878306	0.659182	K.LDAPTNLQFVN[+1809.666]ETDSTVLVR.W	HexNAc(5)Hex(4)Fuc(1)	N[+1810]	>sp|P02751|FINC_HUMAN Fibronectin OS=Homo sapiens OX=9606 GN=FN1 PE=1 SV=5	Color2 [DarkGray]	1	4		20.2619	20.4236	20.4487	19.2656	19.496	20.395
	0.423105	-1.26138	K.LDAPTNLQFVN[+1864.634]ETDSTVLVR.W	HexNAc(2)Hex(9)	N[+1865]	>sp|P02751|FINC_HUMAN Fibronectin OS=Homo sapiens OX=9606 GN=FN1 PE=1 SV=5	Color2 [DarkGray]	1	4		21.6606	21.7957	20.4796	24.2025	20.2294	23.2881
	0.665375	-0.956315	K.LDAPTNLQFVN[+1897.682]ETDSTVLVR.W	HexNAc(4)Hex(4)Fuc(1)NeuAc(1)	N[+1898]	>sp|P02751|FINC_HUMAN Fibronectin OS=Homo sapiens OX=9606 GN=FN1 PE=1 SV=5	Color2 [DarkGray]	1	4		20.2277	18.7577	19.4587	21.1936	19.508	20.6114
	1.45697	-3.46994	K.LDAPTNLQFVN[+1913.677]ETDSTVLVR.W	HexNAc(4)Hex(5)NeuAc(1)	N[+1914]	>sp|P02751|FINC_HUMAN Fibronectin OS=Homo sapiens OX=9606 GN=FN1 PE=1 SV=5	Color2 [DarkGray]	1	4		20.7146	21.0409	21.6541	26.3497	24.8127	22.6571
	0.310701	-0.754387	K.LDAPTNLQFVN[+1930.692]ETDSTVLVR.W	HexNAc(4)Hex(6)Fuc(1)	N[+1931]	>sp|P02751|FINC_HUMAN Fibronectin OS=Homo sapiens OX=9606 GN=FN1 PE=1 SV=5	Color2 [DarkGray]	1	4		17.8492	20.1841	18.6284	20.6663	18.2652	19.9933
	1.42881	3.85893	K.LDAPTNLQFVN[+1971.719]ETDSTVLVR.W	HexNAc(5)Hex(5)Fuc(1)	N[+1972]	>sp|P02751|FINC_HUMAN Fibronectin OS=Homo sapiens OX=9606 GN=FN1 PE=1 SV=5	Color2 [DarkGray]	1	4		24.5621	25.248	25.2029	23.5629	20.3909	19.4825
	0.848969	-1.64756	K.LDAPTNLQFVN[+2059.735]ETDSTVLVR.W	HexNAc(4)Hex(5)Fuc(1)NeuAc(1)	N[+2060]	>sp|P02751|FINC_HUMAN Fibronectin OS=Homo sapiens OX=9606 GN=FN1 PE=1 SV=5	Color2 [DarkGray]	1	4		26.783	27.772	27.1621	30.376	28.8662	27.4175
	1.34856	1.53819	K.LDAPTNLQFVN[+2092.745]ETDSTVLVR.W	HexNAc(4)Hex(7)Fuc(1)	N[+2093]	>sp|P02751|FINC_HUMAN Fibronectin OS=Homo sapiens OX=9606 GN=FN1 PE=1 SV=5	Color2 [DarkGray]	1	4		20.9295	22.3868	20.801	19.5152	19.9635	20.0241
	1.14508	-2.54925	K.LDAPTNLQFVN[+2204.772]ETDSTVLVR.W	HexNAc(4)Hex(5)NeuAc(2)	N[+2205]	>sp|P02751|FINC_HUMAN Fibronectin OS=Homo sapiens OX=9606 GN=FN1 PE=1 SV=5	Color2 [DarkGray]	1	4		24.249	24.6208	25.0784	28.1399	28.2937	25.1623
	0.689826	-0.784585	K.LDAPTNLQFVN[+2313.873]ETDSTVLVR.W	HexNAc(9)Hex(3)	N[+2314]	>sp|P02751|FINC_HUMAN Fibronectin OS=Homo sapiens OX=9606 GN=FN1 PE=1 SV=5	Color2 [DarkGray]	1	4		20.5485	19.0774	19.6175	20.0306	21.0314	20.5352
	0.685037	-1.32388	K.LDAPTNLQFVN[+2350.830]ETDSTVLVR.W	HexNAc(4)Hex(5)Fuc(1)NeuAc(2)	N[+2351]	>sp|P02751|FINC_HUMAN Fibronectin OS=Homo sapiens OX=9606 GN=FN1 PE=1 SV=5	Color2 [DarkGray]	1	4		23.1792	25.913	23.433	25.4879	25.313	25.6959
	0.910477	-2.21798	K.LDAPTNLQFVN[+2352.846]ETDSTVLVR.W	HexNAc(6)Hex(7)	N[+2353]	>sp|P02751|FINC_HUMAN Fibronectin OS=Homo sapiens OX=9606 GN=FN1 PE=1 SV=5	Color2 [DarkGray]	1	4		18.2451	19.1618	18.729	20.5653	23.0015	19.223
	0.846439	3.78226	K.LDAPTNLQFVN[+2424.867]ETDSTVLVR.W	HexNAc(5)Hex(6)Fuc(1)NeuAc(1)	N[+2425]	>sp|P02751|FINC_HUMAN Fibronectin OS=Homo sapiens OX=9606 GN=FN1 PE=1 SV=5	Color2 [DarkGray]	1	4		25.1101	25.4733	19.1906	20.2112	18.8429	19.3731
	2.78203	1.42012	K.LDAPTNLQFVN[+2715.963]ETDSTVLVR.W	HexNAc(5)Hex(6)Fuc(1)NeuAc(2)	N[+2716]	>sp|P02751|FINC_HUMAN Fibronectin OS=Homo sapiens OX=9606 GN=FN1 PE=1 SV=5	Color2 [DarkGray]	1	4		21.0139	21.4793	21.2382	19.5609	19.9382	19.9719
	0.46877	-3.27852	K.LDAPTNLQFVN[+2772.984]ETDSTVLVR.W	HexNAc(6)Hex(6)NeuAc(2)	N[+2773]	>sp|P02751|FINC_HUMAN Fibronectin OS=Homo sapiens OX=9606 GN=FN1 PE=1 SV=5	Color2 [DarkGray]	1	4		19.9159	18.7988	18.6816	19.3538	28.4145	19.4634
+	2.71559	4.83308	K.LDGPTEQC[+57.021]PDPLPLPAGN[+1378.476]C[+57.021]TDEEGIC[+57.021]HR.T	HexNAc(2)Hex(6)	C[+57]*3, N[+1378]	>sp|Q9HC84|MUC5B_HUMAN Mucin-5B OS=Homo sapiens OX=9606 GN=MUC5B PE=1 SV=3	Color2 [DarkGray]	1	4		24.2017	25.013	23.0025	19.0504	18.8002	19.8673
	1.47434	2.16417	K.LDGPTEQC[+57.021]PDPLPLPAGN[+1403.507]C[+57.021]TDEEGIC[+57.021]HR.T	HexNAc(3)Hex(4)Fuc(1)	C[+57]*3, N[+1404]	>sp|Q9HC84|MUC5B_HUMAN Mucin-5B OS=Homo sapiens OX=9606 GN=MUC5B PE=1 SV=3	Color2 [DarkGray]	1	4		20.6012	22.2819	20.3347	18.5269	19.5067	18.6916
	0.26652	0.779285	K.LDGPTEQC[+57.021]PDPLPLPAGN[+1444.534]C[+57.021]TDEEGIC[+57.021]HR.T	HexNAc(4)Hex(3)Fuc(1)	C[+57]*3, N[+1445]	>sp|Q9HC84|MUC5B_HUMAN Mucin-5B OS=Homo sapiens OX=9606 GN=MUC5B PE=1 SV=3	Color2 [DarkGray]	1	4		18.4041	22.2639	20.0829	18.9561	19.3382	20.1187
+	2.63952	4.35208	K.LDGPTEQC[+57.021]PDPLPLPAGN[+1540.529]C[+57.021]TDEEGIC[+57.021]HR.T	HexNAc(2)Hex(7)	C[+57]*3, N[+1541]	>sp|Q9HC84|MUC5B_HUMAN Mucin-5B OS=Homo sapiens OX=9606 GN=MUC5B PE=1 SV=3	Color2 [DarkGray]	1	4		23.9817	23.4994	23.009	19.8856	19.5087	18.0396
	0.854847	1.79245	K.LDGPTEQC[+57.021]PDPLPLPAGN[+1606.587]C[+57.021]TDEEGIC[+57.021]HR.T	HexNAc(4)Hex(4)Fuc(1)	C[+57]*3, N[+1607]	>sp|Q9HC84|MUC5B_HUMAN Mucin-5B OS=Homo sapiens OX=9606 GN=MUC5B PE=1 SV=3	Color2 [DarkGray]	1	4		20.4016	21.9348	21.2601	17.7535	20.69	19.7756
	0.82833	2.19285	K.LDGPTEQC[+57.021]PDPLPLPAGN[+1694.603]C[+57.021]TDEEGIC[+57.021]HR.T	HexNAc(3)Hex(4)Fuc(1)NeuAc(1)	C[+57]*3, N[+1695]	>sp|Q9HC84|MUC5B_HUMAN Mucin-5B OS=Homo sapiens OX=9606 GN=MUC5B PE=1 SV=3	Color2 [DarkGray]	1	4		22.698	19.2428	22.7252	20.1233	19.2514	18.7127
+	3.19089	7.11138	K.LDGPTEQC[+57.021]PDPLPLPAGN[+1702.581]C[+57.021]TDEEGIC[+57.021]HR.T	HexNAc(2)Hex(8)	C[+57]*3, N[+1703]	>sp|Q9HC84|MUC5B_HUMAN Mucin-5B OS=Homo sapiens OX=9606 GN=MUC5B PE=1 SV=3	Color2 [DarkGray]	1	4		27.554	26.5305	25.0273	19.2967	19.3502	19.1307
	0.353475	1.68439	K.LDGPTEQC[+57.021]PDPLPLPAGN[+1704.635]C[+57.021]TDEEGIC[+57.021]HR.T	HexNAc(6)Hex(3)	C[+57]*3, N[+1705]	>sp|Q9HC84|MUC5B_HUMAN Mucin-5B OS=Homo sapiens OX=9606 GN=MUC5B PE=1 SV=3	Color2 [DarkGray]	1	4		24.8303	19.4117	19.022	20.1395	18.1256	19.9457
+	3.58768	5.73264	K.LDGPTEQC[+57.021]PDPLPLPAGN[+1768.640]C[+57.021]TDEEGIC[+57.021]HR.T	HexNAc(4)Hex(5)Fuc(1)	C[+57]*3, N[+1769]	>sp|Q9HC84|MUC5B_HUMAN Mucin-5B OS=Homo sapiens OX=9606 GN=MUC5B PE=1 SV=3	Color2 [DarkGray]	1	4		24.8684	24.97	24.8353	19.9607	18.3404	19.1746
+	5.1748	5.11862	K.LDGPTEQC[+57.021]PDPLPLPAGN[+1809.666]C[+57.021]TDEEGIC[+57.021]HR.T	HexNAc(5)Hex(4)Fuc(1)	C[+57]*3, N[+1810]	>sp|Q9HC84|MUC5B_HUMAN Mucin-5B OS=Homo sapiens OX=9606 GN=MUC5B PE=1 SV=3	Color2 [DarkGray]	1	4		23.9932	24.2339	23.7858	18.6764	18.9789	19.0017
+	2.24205	3.22546	K.LDGPTEQC[+57.021]PDPLPLPAGN[+1864.634]C[+57.021]TDEEGIC[+57.021]HR.T	HexNAc(2)Hex(9)	C[+57]*3, N[+1865]	>sp|Q9HC84|MUC5B_HUMAN Mucin-5B OS=Homo sapiens OX=9606 GN=MUC5B PE=1 SV=3	Color2 [DarkGray]	1	4		23.227	21.8685	23.8001	19.4044	19.9815	19.8334
	1.85119	2.99336	K.LDGPTEQC[+57.021]PDPLPLPAGN[+1897.682]C[+57.021]TDEEGIC[+57.021]HR.T	HexNAc(4)Hex(4)Fuc(1)NeuAc(1)	C[+57]*3, N[+1898]	>sp|Q9HC84|MUC5B_HUMAN Mucin-5B OS=Homo sapiens OX=9606 GN=MUC5B PE=1 SV=3	Color2 [DarkGray]	1	4		21.1381	23.3212	23.2534	19.471	19.6234	19.6382
+	5.34273	10.1265	K.LDGPTEQC[+57.021]PDPLPLPAGN[+2059.735]C[+57.021]TDEEGIC[+57.021]HR.T	HexNAc(4)Hex(5)Fuc(1)NeuAc(1)	C[+57]*3, N[+2060]	>sp|Q9HC84|MUC5B_HUMAN Mucin-5B OS=Homo sapiens OX=9606 GN=MUC5B PE=1 SV=3	Color2 [DarkGray]	1	4		29.2361	29.2512	28.8587	18.8809	18.5843	19.5013
+	4.39881	7.34278	K.LDGPTEQC[+57.021]PDPLPLPAGN[+2100.761]C[+57.021]TDEEGIC[+57.021]HR.T	HexNAc(5)Hex(4)Fuc(1)NeuAc(1)	C[+57]*3, N[+2101]	>sp|Q9HC84|MUC5B_HUMAN Mucin-5B OS=Homo sapiens OX=9606 GN=MUC5B PE=1 SV=3	Color2 [DarkGray]	1	4		26.5563	26.5931	27.4493	19.063	19.8347	19.6727
+	3.06899	4.56117	K.LDGPTEQC[+57.021]PDPLPLPAGN[+2133.772]C[+57.021]TDEEGIC[+57.021]HR.T	HexNAc(5)Hex(6)Fuc(1)	C[+57]*3, N[+2134]	>sp|Q9HC84|MUC5B_HUMAN Mucin-5B OS=Homo sapiens OX=9606 GN=MUC5B PE=1 SV=3	Color2 [DarkGray]	1	4		24.0324	23.5278	22.4866	18.8065	19.1699	18.3869
	1.80794	3.2141	K.LDGPTEQC[+57.021]PDPLPLPAGN[+2221.788]C[+57.021]TDEEGIC[+57.021]HR.T	HexNAc(4)Hex(6)Fuc(1)NeuAc(1)	C[+57]*3, N[+2222]	>sp|Q9HC84|MUC5B_HUMAN Mucin-5B OS=Homo sapiens OX=9606 GN=MUC5B PE=1 SV=3	Color2 [DarkGray]	1	4		22.5945	23.3053	21.7712	20.6158	19.0083	18.4046
	0.499752	1.1957	K.LDGPTEQC[+57.021]PDPLPLPAGN[+2262.814]C[+57.021]TDEEGIC[+57.021]HR.T	HexNAc(5)Hex(5)Fuc(1)NeuAc(1)	C[+57]*3, N[+2263]	>sp|Q9HC84|MUC5B_HUMAN Mucin-5B OS=Homo sapiens OX=9606 GN=MUC5B PE=1 SV=3	Color2 [DarkGray]	1	4		20.239	22.5629	19.0022	19.4444	19.4741	19.2984
+	3.95148	7.64212	K.LDGPTEQC[+57.021]PDPLPLPAGN[+2350.830]C[+57.021]TDEEGIC[+57.021]HR.T	HexNAc(4)Hex(5)Fuc(1)NeuAc(2)	C[+57]*3, N[+2351]	>sp|Q9HC84|MUC5B_HUMAN Mucin-5B OS=Homo sapiens OX=9606 GN=MUC5B PE=1 SV=3	Color2 [DarkGray]	1	4		26.6561	27.162	27.7694	19.6716	20.1628	18.8268
+	2.84976	5.12283	K.LDGPTEQC[+57.021]PDPLPLPAGN[+2391.857]C[+57.021]TDEEGIC[+57.021]HR.T	HexNAc(5)Hex(4)Fuc(1)NeuAc(2)	C[+57]*3, N[+2392]	>sp|Q9HC84|MUC5B_HUMAN Mucin-5B OS=Homo sapiens OX=9606 GN=MUC5B PE=1 SV=3	Color2 [DarkGray]	1	4		24.0706	25.614	23.4622	19.0576	19.4708	19.2498
+	3.73116	5.92181	K.LDGPTEQC[+57.021]PDPLPLPAGN[+2424.867]C[+57.021]TDEEGIC[+57.021]HR.T	HexNAc(5)Hex(6)Fuc(1)NeuAc(1)	C[+57]*3, N[+2425]	>sp|Q9HC84|MUC5B_HUMAN Mucin-5B OS=Homo sapiens OX=9606 GN=MUC5B PE=1 SV=3	Color2 [DarkGray]	1	4		25.6595	25.9647	25.9485	20.4278	20.3104	19.069
+	3.09476	4.98616	K.LDGPTEQC[+57.021]PDPLPLPAGN[+2789.999]C[+57.021]TDEEGIC[+57.021]HR.T	HexNAc(6)Hex(7)Fuc(1)NeuAc(1)	C[+57]*3, N[+2790]	>sp|Q9HC84|MUC5B_HUMAN Mucin-5B OS=Homo sapiens OX=9606 GN=MUC5B PE=1 SV=3	Color2 [DarkGray]	1	4		25.1232	23.9245	24.9761	20.1896	18.9067	19.9691
	0.747032	-1.17596	K.LDLPVN[+2133.772]TSIPNVTEVK.E	HexNAc(5)Hex(6)Fuc(1)	N[+2134]	>sp|P56199|ITA1_HUMAN Integrin alpha-1 OS=Homo sapiens OX=9606 GN=ITGA1 PE=1 SV=2	Color2 [DarkGray]	1	4		20.1433	18.7009	18.9665	21.5489	19.6383	20.1513
	0.16102	-0.518441	K.LEGKSTIN[+3405.200]ESDIAILGEVQAEK.A	HexNAc(6)Hex(9)Fuc(1)NeuAc(2)	N[+3405]	>sp|O94911|ABCA8_HUMAN ABC-type organic anion transporter ABCA8 OS=Homo sapiens OX=9606 GN=ABCA8 PE=1 SV=4	Color2 [DarkGray]	1	4		20.6359	19.2154	18.701	18.6937	19.2815	22.1323
	0.221798	-0.716848	K.LEGLLLGYGSN[+2059.735]VSPNQYFPLPAEGK.F	HexNAc(4)Hex(5)Fuc(1)NeuAc(1)	N[+2060]	>sp|Q7Z7G0|TARSH_HUMAN Target of Nesh-SH3 OS=Homo sapiens OX=9606 GN=ABI3BP PE=1 SV=1	Color2 [DarkGray]	1	4		19.2745	19.0297	20.5964	20.0621	18.4953	22.4936
	0.145566	-0.329791	K.LEGLLLGYGSN[+2350.830]VSPNQYFPLPAEGK.F	HexNAc(4)Hex(5)Fuc(1)NeuAc(2)	N[+2351]	>sp|Q7Z7G0|TARSH_HUMAN Target of Nesh-SH3 OS=Homo sapiens OX=9606 GN=ABI3BP PE=1 SV=1	Color2 [DarkGray]	1	4		18.5223	19.5709	21.0772	20.0694	19.355	20.7355
	0.237966	-0.510787	K.LEHSSSLPAN[+1702.581]VTGFNLIHR.L	HexNAc(2)Hex(8)	N[+1703]	>sp|Q07092|COGA1_HUMAN Collagen alpha-1(XVI) chain OS=Homo sapiens OX=9606 GN=COL16A1 PE=1 SV=2	Color2 [DarkGray]	1	4		18.3741	19.7046	19.6736	18.4432	19.9088	20.9326
	2.31702	1.88057	K.LEN[+2059.735]ISLPPGLSIHIHC[+57.021]TAK.A	HexNAc(4)Hex(5)Fuc(1)NeuAc(1)	C[+57], N[+2060]	>sp|Q9NR99|MXRA5_HUMAN Matrix-remodeling-associated protein 5 OS=Homo sapiens OX=9606 GN=MXRA5 PE=1 SV=3	Color2 [DarkGray]	1	4		22.0356	21.5744	21.516	20.2662	19.2821	19.936
+	3.91459	-6.49796	K.LGAC[+57.021]N[+1913.677]DTLQQLMEVFK.F	HexNAc(4)Hex(5)NeuAc(1)	C[+57], N[+1914]	>sp|P01008|ANT3_HUMAN Antithrombin-III OS=Homo sapiens OX=9606 GN=SERPINC1 PE=1 SV=1	Color2 [DarkGray]	1	4		20.123	19.0077	18.8638	26.1866	25.7436	25.5583
	0.57557	-1.25597	K.LGAC[+57.021]N[+1930.692]DTLQQLMEVFK.F	HexNAc(4)Hex(6)Fuc(1)	C[+57], N[+1931]	>sp|P01008|ANT3_HUMAN Antithrombin-III OS=Homo sapiens OX=9606 GN=SERPINC1 PE=1 SV=1	Color2 [DarkGray]	1	4		19.2915	18.5915	19.1824	21.9246	18.6444	20.2642
	0.597985	-2.52514	K.LGAC[+57.021]N[+2204.772]DTLQQLM[+15.995]EVFK.F	HexNAc(4)Hex(5)NeuAc(2)	C[+57], M[+16], N[+2205]	>sp|P01008|ANT3_HUMAN Antithrombin-III OS=Homo sapiens OX=9606 GN=SERPINC1 PE=1 SV=1	Color2 [DarkGray]	1	4		18.9531	17.8355	19.9869	24.5876	21.3548	18.4085
	1.70452	-6.8903	K.LGAC[+57.021]N[+2204.772]DTLQQLMEVFK.F	HexNAc(4)Hex(5)NeuAc(2)	C[+57], N[+2205]	>sp|P01008|ANT3_HUMAN Antithrombin-III OS=Homo sapiens OX=9606 GN=SERPINC1 PE=1 SV=1	Color2 [DarkGray]	1	4		24.9557	19.6207	25.2497	30.003	30.3275	30.1665
+	2.18516	-3.79128	K.LGAC[+57.021]N[+2221.788]DTLQQLMEVFK.F	HexNAc(4)Hex(6)Fuc(1)NeuAc(1)	C[+57], N[+2222]	>sp|P01008|ANT3_HUMAN Antithrombin-III OS=Homo sapiens OX=9606 GN=SERPINC1 PE=1 SV=1	Color2 [DarkGray]	1	4		20.8408	18.6334	19.5303	23.746	23.8661	22.7663
	1.26585	-1.42902	K.LGDC[+57.021]ISEDSYPDGN[+1784.634]ITWYR.N	HexNAc(4)Hex(6)	C[+57], N[+1785]	>sp|Q13740|CD166_HUMAN CD166 antigen OS=Homo sapiens OX=9606 GN=ALCAM PE=1 SV=2	Color2 [DarkGray]	1	4		18.5349	20.3351	19.731	20.9555	21.0148	20.9177
+	2.75768	2.92655	K.LGDC[+57.021]ISEDSYPDGN[+2059.735]ITWYR.N	HexNAc(4)Hex(5)Fuc(1)NeuAc(1)	C[+57], N[+2060]	>sp|Q13740|CD166_HUMAN CD166 antigen OS=Homo sapiens OX=9606 GN=ALCAM PE=1 SV=2	Color2 [DarkGray]	1	4		21.8218	22.1946	22.4971	19.154	19.8766	18.7033
	0.0811295	0.205361	K.LGDC[+57.021]ISEDSYPDGN[+2350.830]ITWYR.N	HexNAc(4)Hex(5)Fuc(1)NeuAc(2)	C[+57], N[+2351]	>sp|Q13740|CD166_HUMAN CD166 antigen OS=Homo sapiens OX=9606 GN=ALCAM PE=1 SV=2	Color2 [DarkGray]	1	4		21.436	18.7733	18.8535	19.4816	19.8049	19.1603
	1.12529	-1.64128	K.LGLSFNSISAVDN[+1241.454]GSLANTPHLR.E	HexNAc(3)Hex(3)Fuc(1)	N[+1241]	>sp|P07585|PGS2_HUMAN Decorin OS=Homo sapiens OX=9606 GN=DCN PE=1 SV=1	Color2 [DarkGray]	1	4		19.083	20.4345	19.3104	21.1172	22.2524	20.3821
+	4.37167	-4.63532	K.LGLSFNSISAVDN[+1403.507]GSLANTPHLR.E	HexNAc(3)Hex(4)Fuc(1)	N[+1404]	>sp|P07585|PGS2_HUMAN Decorin OS=Homo sapiens OX=9606 GN=DCN PE=1 SV=1	Color2 [DarkGray]	1	4		20.2314	20.9433	20.9437	25.3509	25.3997	25.2738
+	4.11167	-9.95444	K.LGLSFNSISAVDN[+1606.587]GSLANTPHLR.E	HexNAc(4)Hex(4)Fuc(1)	N[+1607]	>sp|P07585|PGS2_HUMAN Decorin OS=Homo sapiens OX=9606 GN=DCN PE=1 SV=1	Color2 [DarkGray]	1	4		18.186	20.0019	18.5851	29.2352	28.4281	28.9729
	1.88771	-3.34688	K.LGLSFNSISAVDN[+1647.613]GSLANTPHLR.E	HexNAc(5)Hex(3)Fuc(1)	N[+1648]	>sp|P07585|PGS2_HUMAN Decorin OS=Homo sapiens OX=9606 GN=DCN PE=1 SV=1	Color2 [DarkGray]	1	4		18.4599	18.7615	18.6703	22.9481	22.5469	20.4374
+	3.45341	-3.34143	K.LGLSFNSISAVDN[+1694.603]GSLANTPHLR.E	HexNAc(3)Hex(4)Fuc(1)NeuAc(1)	N[+1695]	>sp|P07585|PGS2_HUMAN Decorin OS=Homo sapiens OX=9606 GN=DCN PE=1 SV=1	Color2 [DarkGray]	1	4		19.8544	19.2974	20.2186	23.2032	23.3059	22.8855
	0.693728	-0.92226	K.LGLSFNSISAVDN[+1702.581]GSLANTPHLR.E	HexNAc(2)Hex(8)	N[+1703]	>sp|P07585|PGS2_HUMAN Decorin OS=Homo sapiens OX=9606 GN=DCN PE=1 SV=1	Color2 [DarkGray]	1	4		19.0935	19.1729	19.1151	18.8753	20.8905	20.3826
	0.437807	0.837161	K.LGLSFNSISAVDN[+1704.635]GSLANTPHLR.E	HexNAc(6)Hex(3)	N[+1705]	>sp|P07585|PGS2_HUMAN Decorin OS=Homo sapiens OX=9606 GN=DCN PE=1 SV=1	Color2 [DarkGray]	1	4		19.5735	20.7029	18.9874	18.9308	20.0314	17.7901
+	3.94499	-7.3161	K.LGLSFNSISAVDN[+1768.640]GSLANTPHLR.E	HexNAc(4)Hex(5)Fuc(1)	N[+1769]	>sp|P07585|PGS2_HUMAN Decorin OS=Homo sapiens OX=9606 GN=DCN PE=1 SV=1	Color2 [DarkGray]	1	4		24.8883	25.044	24.0421	32.1115	32.5411	31.2701
	1.12911	-4.33019	K.LGLSFNSISAVDN[+1809.666]GSLANTPHLR.E	HexNAc(5)Hex(4)Fuc(1)	N[+1810]	>sp|P07585|PGS2_HUMAN Decorin OS=Homo sapiens OX=9606 GN=DCN PE=1 SV=1	Color2 [DarkGray]	1	4		24.2483	19.0303	24.381	27.6265	26.6906	26.3332
+	2.10126	-3.07321	K.LGLSFNSISAVDN[+1864.634]GSLANTPHLR.E	HexNAc(2)Hex(9)	N[+1865]	>sp|P07585|PGS2_HUMAN Decorin OS=Homo sapiens OX=9606 GN=DCN PE=1 SV=1	Color2 [DarkGray]	1	4		18.6632	19.3254	19.0649	20.9188	22.5102	22.8441
+	3.99707	-7.416	K.LGLSFNSISAVDN[+1897.682]GSLANTPHLR.E	HexNAc(4)Hex(4)Fuc(1)NeuAc(1)	N[+1898]	>sp|P07585|PGS2_HUMAN Decorin OS=Homo sapiens OX=9606 GN=DCN PE=1 SV=1	Color2 [DarkGray]	1	4		23.1114	22.318	21.8783	30.4251	29.7849	29.3457
	0.865343	-4.39255	K.LGLSFNSISAVDN[+1913.677]GSLANTPHLR.E	HexNAc(4)Hex(5)NeuAc(1)	N[+1914]	>sp|P07585|PGS2_HUMAN Decorin OS=Homo sapiens OX=9606 GN=DCN PE=1 SV=1	Color2 [DarkGray]	1	4		18.6311	18.8155	19.7218	27.7969	19.7899	22.7591
+	3.08311	-3.38494	K.LGLSFNSISAVDN[+1930.692]GSLANTPHLR.E	HexNAc(4)Hex(6)Fuc(1)	N[+1931]	>sp|P07585|PGS2_HUMAN Decorin OS=Homo sapiens OX=9606 GN=DCN PE=1 SV=1	Color2 [DarkGray]	1	4		19.3941	19.181	18.2109	22.1439	22.4149	22.3821
	1.22148	-1.89703	K.LGLSFNSISAVDN[+1971.719]GSLANTPHLR.E	HexNAc(5)Hex(5)Fuc(1)	N[+1972]	>sp|P07585|PGS2_HUMAN Decorin OS=Homo sapiens OX=9606 GN=DCN PE=1 SV=1	Color2 [DarkGray]	1	4		24.5898	23.4087	25.0857	26.495	27.0418	25.2385
	0.585196	-0.702726	K.LGLSFNSISAVDN[+2012.745]GSLANTPHLR.E	HexNAc(6)Hex(4)Fuc(1)	N[+2013]	>sp|P07585|PGS2_HUMAN Decorin OS=Homo sapiens OX=9606 GN=DCN PE=1 SV=1	Color2 [DarkGray]	1	4		19.1916	19.5369	19.0086	19.245	19.6535	20.9469
+	2.71949	-3.33928	K.LGLSFNSISAVDN[+2059.735]GSLANTPHLR.E	HexNAc(4)Hex(5)Fuc(1)NeuAc(1)	N[+2060]	>sp|P07585|PGS2_HUMAN Decorin OS=Homo sapiens OX=9606 GN=DCN PE=1 SV=1	Color2 [DarkGray]	1	4		28.0515	28.7387	29.5266	31.8872	31.9971	32.4504
	0.0757086	-0.370891	K.LGLSFNSISAVDN[+2069.767]GSLANTPHLR.E	HexNAc(7)Hex(4)	N[+2070]	>sp|P07585|PGS2_HUMAN Decorin OS=Homo sapiens OX=9606 GN=DCN PE=1 SV=1	Color2 [DarkGray]	1	4		18.9754	21.7029	19.0106	20.5542	22.6511	17.5962
	1.813	-2.86281	K.LGLSFNSISAVDN[+2100.761]GSLANTPHLR.E	HexNAc(5)Hex(4)Fuc(1)NeuAc(1)	N[+2101]	>sp|P07585|PGS2_HUMAN Decorin OS=Homo sapiens OX=9606 GN=DCN PE=1 SV=1	Color2 [DarkGray]	1	4		24.0627	23.2556	21.9046	25.7037	26.5672	25.5403
+	2.76426	-8.5877	K.LGLSFNSISAVDN[+2133.772]GSLANTPHLR.E	HexNAc(5)Hex(6)Fuc(1)	N[+2134]	>sp|P07585|PGS2_HUMAN Decorin OS=Homo sapiens OX=9606 GN=DCN PE=1 SV=1	Color2 [DarkGray]	1	4		19.1996	18.2818	20.7398	29.7759	27.3235	26.8849
+	2.95813	-4.93028	K.LGLSFNSISAVDN[+2174.798]GSLANTPHLR.E	HexNAc(6)Hex(5)Fuc(1)	N[+2175]	>sp|P07585|PGS2_HUMAN Decorin OS=Homo sapiens OX=9606 GN=DCN PE=1 SV=1	Color2 [DarkGray]	1	4		19.8714	18.4787	18.8822	23.1928	24.2636	24.5668
	1.05102	-2.50312	K.LGLSFNSISAVDN[+2221.788]GSLANTPHLR.E	HexNAc(4)Hex(6)Fuc(1)NeuAc(1)	N[+2222]	>sp|P07585|PGS2_HUMAN Decorin OS=Homo sapiens OX=9606 GN=DCN PE=1 SV=1	Color2 [DarkGray]	1	4		18.7454	19.99	18.9184	22.8033	19.6233	22.7366
	0.781729	-2.61315	K.LGLSFNSISAVDN[+2245.799]GSLANTPHLR.E	HexNAc(5)Hex(4)NeuAc(2)	N[+2246]	>sp|P07585|PGS2_HUMAN Decorin OS=Homo sapiens OX=9606 GN=DCN PE=1 SV=1	Color2 [DarkGray]	1	4		17.4555	19.4088	17.7223	19.6278	23.6267	19.1716
	0.130126	1.01797	K.LGLSFNSISAVDN[+2262.814]GSLANTPHLR.E	HexNAc(5)Hex(5)Fuc(1)NeuAc(1)	N[+2263]	>sp|P07585|PGS2_HUMAN Decorin OS=Homo sapiens OX=9606 GN=DCN PE=1 SV=1	Color2 [DarkGray]	1	4		22.999	18.2863	24.252	18.2334	25.262	18.988
+	2.42716	-5.64514	K.LGLSFNSISAVDN[+2313.873]GSLANTPHLR.E	HexNAc(9)Hex(3)	N[+2314]	>sp|P07585|PGS2_HUMAN Decorin OS=Homo sapiens OX=9606 GN=DCN PE=1 SV=1	Color2 [DarkGray]	1	4		17.2026	18.9843	18.6374	23.7341	25.3104	22.7152
+	2.67333	-3.15426	K.LGLSFNSISAVDN[+2350.830]GSLANTPHLR.E	HexNAc(4)Hex(5)Fuc(1)NeuAc(2)	N[+2351]	>sp|P07585|PGS2_HUMAN Decorin OS=Homo sapiens OX=9606 GN=DCN PE=1 SV=1	Color2 [DarkGray]	1	4		26.5735	26.6324	26.8985	29.9568	29.0561	30.5541
	0.898413	-2.181	K.LGLSFNSISAVDN[+2391.857]GSLANTPHLR.E	HexNAc(5)Hex(4)Fuc(1)NeuAc(2)	N[+2392]	>sp|P07585|PGS2_HUMAN Decorin OS=Homo sapiens OX=9606 GN=DCN PE=1 SV=1	Color2 [DarkGray]	1	4		18.837	19.2828	19.3872	19.1961	21.897	22.9569
	0.464199	-3.05996	K.LGLSFNSISAVDN[+2407.852]GSLANTPHLR.E	HexNAc(5)Hex(5)NeuAc(2)	N[+2408]	>sp|P07585|PGS2_HUMAN Decorin OS=Homo sapiens OX=9606 GN=DCN PE=1 SV=1	Color2 [DarkGray]	1	4		19.4175	18.7118	22.1484	25.5272	26.069	17.8614
	2.00163	-1.31164	K.LGLSFNSISAVDN[+2424.867]GSLANTPHLR.E	HexNAc(5)Hex(6)Fuc(1)NeuAc(1)	N[+2425]	>sp|P07585|PGS2_HUMAN Decorin OS=Homo sapiens OX=9606 GN=DCN PE=1 SV=1	Color2 [DarkGray]	1	4		26.8029	26.6187	27.321	28.4198	27.8423	28.4155
	0.906102	-2.64481	K.LGLSFNSISAVDN[+2465.894]GSLANTPHLR.E	HexNAc(6)Hex(5)Fuc(1)NeuAc(1)	N[+2466]	>sp|P07585|PGS2_HUMAN Decorin OS=Homo sapiens OX=9606 GN=DCN PE=1 SV=1	Color2 [DarkGray]	1	4		18.9689	19.9415	19.037	22.9711	23.578	19.3327
	0.130786	-0.316577	K.LGLSFNSISAVDN[+2553.910]GSLANTPHLR.E	HexNAc(5)Hex(5)Fuc(1)NeuAc(2)	N[+2554]	>sp|P07585|PGS2_HUMAN Decorin OS=Homo sapiens OX=9606 GN=DCN PE=1 SV=1	Color2 [DarkGray]	1	4		19.4688	19.5522	19.034	21.3861	18.5187	19.0999
+	2.24542	-3.67735	K.LGLSFNSISAVDN[+2715.963]GSLANTPHLR.E	HexNAc(5)Hex(6)Fuc(1)NeuAc(2)	N[+2716]	>sp|P07585|PGS2_HUMAN Decorin OS=Homo sapiens OX=9606 GN=DCN PE=1 SV=1	Color2 [DarkGray]	1	4		23.762	22.7374	22.5783	27.7983	26.435	25.8766
+	3.22742	-5.46635	K.LGLSFNSISAVDN[+2789.999]GSLANTPHLR.E	HexNAc(6)Hex(7)Fuc(1)NeuAc(1)	N[+2790]	>sp|P07585|PGS2_HUMAN Decorin OS=Homo sapiens OX=9606 GN=DCN PE=1 SV=1	Color2 [DarkGray]	1	4		18.6649	18.8972	18.6866	24.3664	23.1985	25.0828
	1.9175	-3.30935	K.LGLSFNSISAVDN[+3007.058]GSLANTPHLR.E	HexNAc(5)Hex(6)Fuc(1)NeuAc(3)	N[+3007]	>sp|P07585|PGS2_HUMAN Decorin OS=Homo sapiens OX=9606 GN=DCN PE=1 SV=1	Color2 [DarkGray]	1	4		18.0318	19.7193	19.1001	22.7623	21.1069	22.91
	0.234512	-0.356902	K.LGLSFNSISAVDN[+3081.095]GSLANTPHLR.E	HexNAc(6)Hex(7)Fuc(1)NeuAc(2)	N[+3081]	>sp|P07585|PGS2_HUMAN Decorin OS=Homo sapiens OX=9606 GN=DCN PE=1 SV=1	Color2 [DarkGray]	1	4		19.2634	19.7913	19.7638	19.0164	19.8775	20.9953
	0.0380486	-0.0975602	K.LGN[+1622.582]WSAMPSC[+57.021]K.A	HexNAc(4)Hex(5)	C[+57], N[+1623]	>sp|P02749|APOH_HUMAN Beta-2-glycoprotein 1 OS=Homo sapiens OX=9606 GN=APOH PE=1 SV=3	Color2 [DarkGray]	1	4		19.3896	20.7414	18.7536	19.0511	21.0112	19.1149
	2.07326	-1.98831	K.LGN[+1913.677]WSAMPSC[+57.021]K.A	HexNAc(4)Hex(5)NeuAc(1)	C[+57], N[+1914]	>sp|P02749|APOH_HUMAN Beta-2-glycoprotein 1 OS=Homo sapiens OX=9606 GN=APOH PE=1 SV=3	Color2 [DarkGray]	1	4		27.3003	27.1939	27.5552	28.5934	29.9503	29.4706
	0.440282	-1.98308	K.LGN[+2204.772]WSAM[+15.995]PSC[+57.021]K.A	HexNAc(4)Hex(5)NeuAc(2)	C[+57], M[+16], N[+2205]	>sp|P02749|APOH_HUMAN Beta-2-glycoprotein 1 OS=Homo sapiens OX=9606 GN=APOH PE=1 SV=3	Color2 [DarkGray]	1	4		26.7398	20.1064	22.8046	25.5115	25.1119	24.9766
	0.331915	0.324187	K.LGN[+2204.772]WSAMPSC[+57.021]K.A	HexNAc(4)Hex(5)NeuAc(2)	C[+57], N[+2205]	>sp|P02749|APOH_HUMAN Beta-2-glycoprotein 1 OS=Homo sapiens OX=9606 GN=APOH PE=1 SV=3	Color2 [DarkGray]	1	4		28.9756	28.8386	28.5476	29.2096	27.9478	28.2318
	0.254244	0.542206	K.LGNTISSLFGGGTTPDAKEN[+1241.454]GTDTVQEEEESPAEGSK.D	HexNAc(3)Hex(3)Fuc(1)	N[+1241]	>sp|Q9Y4L1|HYOU1_HUMAN Hypoxia up-regulated protein 1 OS=Homo sapiens OX=9606 GN=HYOU1 PE=1 SV=1	Color2 [DarkGray]	1	4		20.2449	20.0457	20.7596	20.8359	20.3999	18.1877
	0.674928	-1.18436	K.LGSFEGLVN[+2059.735]LTFIHLQHNR.L	HexNAc(4)Hex(5)Fuc(1)NeuAc(1)	N[+2060]	>sp|P51884|LUM_HUMAN Lumican OS=Homo sapiens OX=9606 GN=LUM PE=1 SV=2	Color2 [DarkGray]	1	4		19.5587	19.8758	19.5125	20.1658	22.4046	19.9295
	0.0849038	-0.229598	K.LGSFEGLVN[+2204.772]LTFIHLQHNR.L	HexNAc(4)Hex(5)NeuAc(2)	N[+2205]	>sp|P51884|LUM_HUMAN Lumican OS=Homo sapiens OX=9606 GN=LUM PE=1 SV=2	Color2 [DarkGray]	1	4		18.8852	18.2	21.1483	18.9377	20.0528	19.9318
	0.369509	-2.0626	K.LGSFEGLVN[+2350.830]LTFIHLQHNR.L	HexNAc(4)Hex(5)Fuc(1)NeuAc(2)	N[+2351]	>sp|P51884|LUM_HUMAN Lumican OS=Homo sapiens OX=9606 GN=LUM PE=1 SV=2	Color2 [DarkGray]	1	4		18.5986	19.4546	18.9623	18.9173	25.7085	18.5776
	0.468562	-1.45966	K.LGSFEGLVN[+2569.905]LTFIHLQHNR.L	HexNAc(5)Hex(6)NeuAc(2)	N[+2570]	>sp|P51884|LUM_HUMAN Lumican OS=Homo sapiens OX=9606 GN=LUM PE=1 SV=2	Color2 [DarkGray]	1	4		19.5354	19.8314	18.9792	19.0506	23.4743	20.2001
	0.338177	-0.896556	K.LGSFEGLVN[+2643.941]LTFIHLQHNR.L	HexNAc(6)Hex(7)NeuAc(1)	N[+2644]	>sp|P51884|LUM_HUMAN Lumican OS=Homo sapiens OX=9606 GN=LUM PE=1 SV=2	Color2 [DarkGray]	1	4		19.5026	18.694	18.7675	18.1264	21.8033	19.7241
	1.01191	0.964443	K.LGSFEGLVN[+2715.963]LTFIHLQHNR.L	HexNAc(5)Hex(6)Fuc(1)NeuAc(2)	N[+2716]	>sp|P51884|LUM_HUMAN Lumican OS=Homo sapiens OX=9606 GN=LUM PE=1 SV=2	Color2 [DarkGray]	1	4		20.0508	19.1553	20.3145	19.4277	18.5492	18.6504
	0.176075	-0.643988	K.LGSFEGLVN[+2861.000]LTFIHLQHNR.L	HexNAc(5)Hex(6)NeuAc(3)	N[+2861]	>sp|P51884|LUM_HUMAN Lumican OS=Homo sapiens OX=9606 GN=LUM PE=1 SV=2	Color2 [DarkGray]	1	4		18.8596	20.1568	18.2728	17.7247	22.0895	19.407
	0.312285	-1.11431	K.LGSFEGLVN[+3081.095]LTFIHLQHNR.L	HexNAc(6)Hex(7)Fuc(1)NeuAc(2)	N[+3081]	>sp|P51884|LUM_HUMAN Lumican OS=Homo sapiens OX=9606 GN=LUM PE=1 SV=2	Color2 [DarkGray]	1	4		19.0435	21.5041	21.0979	22.1395	23.5373	19.3117
	0.416464	0.660027	K.LHIAQPEN[+1540.529]NTHVALFK.M	HexNAc(2)Hex(7)	N[+1541]	>sp|Q75T13|PGAP1_HUMAN GPI inositol-deacylase OS=Homo sapiens OX=9606 GN=PGAP1 PE=1 SV=1	Color2 [DarkGray]	1	4		20.1735	20.4007	19.7006	20.5135	19.4905	18.2907
	0.430745	1.89397	K.LHIAQPEN[+1702.581]NTHVALFK.M	HexNAc(2)Hex(8)	N[+1703]	>sp|Q75T13|PGAP1_HUMAN GPI inositol-deacylase OS=Homo sapiens OX=9606 GN=PGAP1 PE=1 SV=1	Color2 [DarkGray]	1	4		25.0761	25.9355	26.0576	26.3495	24.8502	20.1877
	0.165316	-0.824572	K.LHIAQPEN[+1864.634]NTHVALFK.M	HexNAc(2)Hex(9)	N[+1865]	>sp|Q75T13|PGAP1_HUMAN GPI inositol-deacylase OS=Homo sapiens OX=9606 GN=PGAP1 PE=1 SV=1	Color2 [DarkGray]	1	4		18.0395	22.3445	20.6301	22.1927	22.9052	18.3899
	0.942275	-1.18358	K.LHINHNN[+1565.560]LTESVGPLPK.S	HexNAc(3)Hex(5)Fuc(1)	N[+1566]	>sp|P51884|LUM_HUMAN Lumican OS=Homo sapiens OX=9606 GN=LUM PE=1 SV=2	Color2 [DarkGray]	1	4		19.3866	18.0356	19.9032	20.6452	20.0054	20.2255
	1.12885	-2.74586	K.LHINHNN[+1606.587]LTESVGPLPK.S	HexNAc(4)Hex(4)Fuc(1)	N[+1607]	>sp|P51884|LUM_HUMAN Lumican OS=Homo sapiens OX=9606 GN=LUM PE=1 SV=2	Color2 [DarkGray]	1	4		19.324	19.4185	19.4697	24.3283	21.6618	20.4597
+	2.03286	-4.69962	K.LHINHNN[+1622.582]LTESVGPLPK.S	HexNAc(4)Hex(5)	N[+1623]	>sp|P51884|LUM_HUMAN Lumican OS=Homo sapiens OX=9606 GN=LUM PE=1 SV=2	Color2 [DarkGray]	1	4		19.689	19.6122	18.9286	25.9147	22.5958	23.8182
	0.673001	-1.40137	K.LHINHNN[+1694.603]LTESVGPLPK.S	HexNAc(3)Hex(4)Fuc(1)NeuAc(1)	N[+1695]	>sp|P51884|LUM_HUMAN Lumican OS=Homo sapiens OX=9606 GN=LUM PE=1 SV=2	Color2 [DarkGray]	1	4		20.0234	19.8892	20.0263	23.2679	20.3751	20.5001
	0.891377	3.24453	K.LHINHNN[+1702.581]LTESVGPLPK.S	HexNAc(2)Hex(8)	N[+1703]	>sp|P51884|LUM_HUMAN Lumican OS=Homo sapiens OX=9606 GN=LUM PE=1 SV=2	Color2 [DarkGray]	1	4		25.4072	20.2928	20.5636	18.6422	18.3742	19.5135
	0.0821243	-0.253215	K.LHINHNN[+1710.598]LTESVGPLPK.S	HexNAc(3)Hex(5)NeuAc(1)	N[+1711]	>sp|P51884|LUM_HUMAN Lumican OS=Homo sapiens OX=9606 GN=LUM PE=1 SV=2	Color2 [DarkGray]	1	4		19.2889	20.1502	20.3942	21.4334	21.0226	18.1369
+	2.37883	-3.88049	K.LHINHNN[+1768.640]LTESVGPLPK.S	HexNAc(4)Hex(5)Fuc(1)	N[+1769]	>sp|P51884|LUM_HUMAN Lumican OS=Homo sapiens OX=9606 GN=LUM PE=1 SV=2	Color2 [DarkGray]	1	4		27.4455	25.3509	26.4703	30.4828	30.6411	29.7842
	0.518423	-2.53061	K.LHINHNN[+1809.666]LTESVGPLPK.S	HexNAc(5)Hex(4)Fuc(1)	N[+1810]	>sp|P51884|LUM_HUMAN Lumican OS=Homo sapiens OX=9606 GN=LUM PE=1 SV=2	Color2 [DarkGray]	1	4		19.1559	19.8164	21.9477	25.1717	24.42	18.92
	0.77888	1.53772	K.LHINHNN[+1864.634]LTESVGPLPK.S	HexNAc(2)Hex(9)	N[+1865]	>sp|P51884|LUM_HUMAN Lumican OS=Homo sapiens OX=9606 GN=LUM PE=1 SV=2	Color2 [DarkGray]	1	4		23.1171	23.3612	24.3556	22.8203	22.9795	20.4209
	0.633488	-0.547474	K.LHINHNN[+1897.682]LTESVGPLPK.S	HexNAc(4)Hex(4)Fuc(1)NeuAc(1)	N[+1898]	>sp|P51884|LUM_HUMAN Lumican OS=Homo sapiens OX=9606 GN=LUM PE=1 SV=2	Color2 [DarkGray]	1	4		19.9407	19.2614	19.5228	20.373	20.5363	19.4581
	1.91873	-4.84012	K.LHINHNN[+1913.677]LTESVGPLPK.S	HexNAc(4)Hex(5)NeuAc(1)	N[+1914]	>sp|P51884|LUM_HUMAN Lumican OS=Homo sapiens OX=9606 GN=LUM PE=1 SV=2	Color2 [DarkGray]	1	4		21.9522	19.7919	20.352	26.7808	26.0503	23.7853
	0.552649	1.13794	K.LHINHNN[+1971.719]LTESVGPLPK.S	HexNAc(5)Hex(5)Fuc(1)	N[+1972]	>sp|P51884|LUM_HUMAN Lumican OS=Homo sapiens OX=9606 GN=LUM PE=1 SV=2	Color2 [DarkGray]	1	4		27.2542	27.3884	27.8261	27.6643	26.7503	24.6404
	0.391422	-1.36479	K.LHINHNN[+1987.714]LTESVGPLPK.S	HexNAc(5)Hex(6)	N[+1988]	>sp|P51884|LUM_HUMAN Lumican OS=Homo sapiens OX=9606 GN=LUM PE=1 SV=2	Color2 [DarkGray]	1	4		20.9615	19.3548	19.7067	23.8113	19.005	21.3011
	0.75399	-1.04218	K.LHINHNN[+2026.687]LTESVGPLPK.S	HexNAc(2)Hex(10)	N[+2027]	>sp|P51884|LUM_HUMAN Lumican OS=Homo sapiens OX=9606 GN=LUM PE=1 SV=2	Color2 [DarkGray]	1	4		18.4641	18.7892	20.2999	19.6491	20.4912	20.5394
+	2.50969	-3.13579	K.LHINHNN[+2059.735]LTESVGPLPK.S	HexNAc(4)Hex(5)Fuc(1)NeuAc(1)	N[+2060]	>sp|P51884|LUM_HUMAN Lumican OS=Homo sapiens OX=9606 GN=LUM PE=1 SV=2	Color2 [DarkGray]	1	4		28.9037	29.203	29.0336	32.973	32.2702	31.3046
	0.839267	-1.32133	K.LHINHNN[+2075.730]LTESVGPLPK.S	HexNAc(4)Hex(6)NeuAc(1)	N[+2076]	>sp|P51884|LUM_HUMAN Lumican OS=Homo sapiens OX=9606 GN=LUM PE=1 SV=2	Color2 [DarkGray]	1	4		19.8888	20.2509	20.4282	22.791	20.3262	21.4147
+	3.53455	-5.64285	K.LHINHNN[+2100.761]LTESVGPLPK.S	HexNAc(5)Hex(4)Fuc(1)NeuAc(1)	N[+2101]	>sp|P51884|LUM_HUMAN Lumican OS=Homo sapiens OX=9606 GN=LUM PE=1 SV=2	Color2 [DarkGray]	1	4		18.7532	19.2924	19.0719	24.939	25.3014	23.8057
+	2.18529	-8.75343	K.LHINHNN[+2133.772]LTESVGPLPK.S	HexNAc(5)Hex(6)Fuc(1)	N[+2134]	>sp|P51884|LUM_HUMAN Lumican OS=Homo sapiens OX=9606 GN=LUM PE=1 SV=2	Color2 [DarkGray]	1	4		17.9241	18.9052	23.1908	29.2281	29.2335	27.819
	1.12081	-2.76391	K.LHINHNN[+2204.772]LTESVGPLPK.S	HexNAc(4)Hex(5)NeuAc(2)	N[+2205]	>sp|P51884|LUM_HUMAN Lumican OS=Homo sapiens OX=9606 GN=LUM PE=1 SV=2	Color2 [DarkGray]	1	4		19.1818	20.478	20.9599	24.5019	21.0089	23.4005
	1.03136	-1.34334	K.LHINHNN[+2221.788]LTESVGPLPK.S	HexNAc(4)Hex(6)Fuc(1)NeuAc(1)	N[+2222]	>sp|P51884|LUM_HUMAN Lumican OS=Homo sapiens OX=9606 GN=LUM PE=1 SV=2	Color2 [DarkGray]	1	4		19.2526	19.466	19.0302	19.4007	21.0953	21.2828
	0.599197	-0.690763	K.LHINHNN[+2262.814]LTESVGPLPK.S	HexNAc(5)Hex(5)Fuc(1)NeuAc(1)	N[+2263]	>sp|P51884|LUM_HUMAN Lumican OS=Homo sapiens OX=9606 GN=LUM PE=1 SV=2	Color2 [DarkGray]	1	4		24.0771	24.304	23.9416	24.6484	24.0083	25.7383
	1.49564	-3.86135	K.LHINHNN[+2278.809]LTESVGPLPK.S	HexNAc(5)Hex(6)NeuAc(1)	N[+2279]	>sp|P51884|LUM_HUMAN Lumican OS=Homo sapiens OX=9606 GN=LUM PE=1 SV=2	Color2 [DarkGray]	1	4		18.6255	19.7108	20.0917	22.6886	25.5029	21.8205
	0.676257	-3.23838	K.LHINHNN[+2313.873]LTESVGPLPK.S	HexNAc(9)Hex(3)	N[+2314]	>sp|P51884|LUM_HUMAN Lumican OS=Homo sapiens OX=9606 GN=LUM PE=1 SV=2	Color2 [DarkGray]	1	4		17.9701	19.504	19.9791	21.1365	26.4672	19.5646
	0.424175	-1.41905	K.LHINHNN[+2336.851]LTESVGPLPK.S	HexNAc(6)Hex(6)Fuc(1)	N[+2337]	>sp|P51884|LUM_HUMAN Lumican OS=Homo sapiens OX=9606 GN=LUM PE=1 SV=2	Color2 [DarkGray]	1	4		19.5942	20.1982	19.054	19.7665	23.8092	19.5278
+	3.59426	-3.00759	K.LHINHNN[+2350.830]LTESVGPLPK.S	HexNAc(4)Hex(5)Fuc(1)NeuAc(2)	N[+2351]	>sp|P51884|LUM_HUMAN Lumican OS=Homo sapiens OX=9606 GN=LUM PE=1 SV=2	Color2 [DarkGray]	1	4		28.5756	28.2683	28.1083	31.7268	31.1809	31.0674
	0.443909	1.67907	K.LHINHNN[+2352.846]LTESVGPLPK.S	HexNAc(6)Hex(7)	N[+2353]	>sp|P51884|LUM_HUMAN Lumican OS=Homo sapiens OX=9606 GN=LUM PE=1 SV=2	Color2 [DarkGray]	1	4		19.4377	24.2181	19.4572	18.9345	19.124	20.0173
	1.55209	-5.52369	K.LHINHNN[+2391.857]LTESVGPLPK.S	HexNAc(5)Hex(4)Fuc(1)NeuAc(2)	N[+2392]	>sp|P51884|LUM_HUMAN Lumican OS=Homo sapiens OX=9606 GN=LUM PE=1 SV=2	Color2 [DarkGray]	1	4		18.5688	18.8938	17.8021	25.7674	25.3268	20.7416
	1.03639	-5.72142	K.LHINHNN[+2407.852]LTESVGPLPK.S	HexNAc(5)Hex(5)NeuAc(2)	N[+2408]	>sp|P51884|LUM_HUMAN Lumican OS=Homo sapiens OX=9606 GN=LUM PE=1 SV=2	Color2 [DarkGray]	1	4		19.1734	19.306	18.9001	27.7666	27.0947	19.6825
+	3.27372	-3.42438	K.LHINHNN[+2424.867]LTESVGPLPK.S	HexNAc(5)Hex(6)Fuc(1)NeuAc(1)	N[+2425]	>sp|P51884|LUM_HUMAN Lumican OS=Homo sapiens OX=9606 GN=LUM PE=1 SV=2	Color2 [DarkGray]	1	4		26.4302	26.9326	26.7719	29.6142	30.6654	30.1282
+	2.56678	-5.56007	K.LHINHNN[+2498.904]LTESVGPLPK.S	HexNAc(6)Hex(7)Fuc(1)	N[+2499]	>sp|P51884|LUM_HUMAN Lumican OS=Homo sapiens OX=9606 GN=LUM PE=1 SV=2	Color2 [DarkGray]	1	4		19.485	18.4364	19.3702	25.4217	25.4378	23.1123
	0.469326	-2.10116	K.LHINHNN[+2569.905]LTESVGPLPK.S	HexNAc(5)Hex(6)NeuAc(2)	N[+2570]	>sp|P51884|LUM_HUMAN Lumican OS=Homo sapiens OX=9606 GN=LUM PE=1 SV=2	Color2 [DarkGray]	1	4		19.7992	18.3363	19.2738	25.0131	19.1665	19.5332
	0.909656	2.6764	K.LHINHNN[+2627.947]LTESVGPLPK.S	HexNAc(6)Hex(6)Fuc(1)NeuAc(1)	N[+2628]	>sp|P51884|LUM_HUMAN Lumican OS=Homo sapiens OX=9606 GN=LUM PE=1 SV=2	Color2 [DarkGray]	1	4		19.1924	22.7129	23.6948	19.282	18.9277	19.3612
+	2.70823	-3.11235	K.LHINHNN[+2715.963]LTESVGPLPK.S	HexNAc(5)Hex(6)Fuc(1)NeuAc(2)	N[+2716]	>sp|P51884|LUM_HUMAN Lumican OS=Homo sapiens OX=9606 GN=LUM PE=1 SV=2	Color2 [DarkGray]	1	4		25.6786	26.7971	26.6842	29.7299	29.0104	29.7566
	0.290356	-2.12595	K.LHINHNN[+2717.978]LTESVGPLPK.S	HexNAc(7)Hex(8)	N[+2718]	>sp|P51884|LUM_HUMAN Lumican OS=Homo sapiens OX=9606 GN=LUM PE=1 SV=2	Color2 [DarkGray]	1	4		20.0896	20.4565	18.6724	18.3811	19.5695	27.6457
	0.3914	-1.0727	K.LHINHNN[+2772.984]LTESVGPLPK.S	HexNAc(6)Hex(6)NeuAc(2)	N[+2773]	>sp|P51884|LUM_HUMAN Lumican OS=Homo sapiens OX=9606 GN=LUM PE=1 SV=2	Color2 [DarkGray]	1	4		19.5502	19.6533	19.6273	22.8308	20.3496	18.8686
	0.713298	-4.84772	K.LHINHNN[+2789.999]LTESVGPLPK.S	HexNAc(6)Hex(7)Fuc(1)NeuAc(1)	N[+2790]	>sp|P51884|LUM_HUMAN Lumican OS=Homo sapiens OX=9606 GN=LUM PE=1 SV=2	Color2 [DarkGray]	1	4		19.1997	18.9154	24.8533	21.0246	28.8257	27.6613
	0.640496	-3.0491	K.LHINHNN[+2864.036]LTESVGPLPK.S	HexNAc(7)Hex(8)Fuc(1)	N[+2864]	>sp|P51884|LUM_HUMAN Lumican OS=Homo sapiens OX=9606 GN=LUM PE=1 SV=2	Color2 [DarkGray]	1	4		20.0314	19.5935	23.4169	26.0471	20.5185	25.6235
	1.84206	-4.46392	K.LHINHNN[+3081.095]LTESVGPLPK.S	HexNAc(6)Hex(7)Fuc(1)NeuAc(2)	N[+3081]	>sp|P51884|LUM_HUMAN Lumican OS=Homo sapiens OX=9606 GN=LUM PE=1 SV=2	Color2 [DarkGray]	1	4		22.3266	25.1164	24.2754	29.2077	26.9947	28.9078
	0.266359	-0.701665	K.LHINHNN[+3155.132]LTESVGPLPK.S	HexNAc(7)Hex(8)Fuc(1)NeuAc(1)	N[+3155]	>sp|P51884|LUM_HUMAN Lumican OS=Homo sapiens OX=9606 GN=LUM PE=1 SV=2	Color2 [DarkGray]	1	4		19.6049	19.2504	19.2529	18.7811	19.2896	22.1426
	1.42624	-2.50041	K.LHINHNN[+3226.132]LTESVGPLPK.S	HexNAc(6)Hex(7)NeuAc(3)	N[+3226]	>sp|P51884|LUM_HUMAN Lumican OS=Homo sapiens OX=9606 GN=LUM PE=1 SV=2	Color2 [DarkGray]	1	4		18.1126	20.5341	19.4642	21.3383	21.5788	22.695
	0.251444	-0.354939	K.LHINHNN[+3229.168]LTESVGPLPK.S	HexNAc(8)Hex(9)Fuc(1)	N[+3229]	>sp|P51884|LUM_HUMAN Lumican OS=Homo sapiens OX=9606 GN=LUM PE=1 SV=2	Color2 [DarkGray]	1	4		18.97	18.8443	19.9327	19.1788	19.1458	20.4873
	0.457193	0.790382	K.LHINHNN[+3372.190]LTESVGPLPK.S	HexNAc(6)Hex(7)Fuc(1)NeuAc(3)	N[+3372]	>sp|P51884|LUM_HUMAN Lumican OS=Homo sapiens OX=9606 GN=LUM PE=1 SV=2	Color2 [DarkGray]	1	4		19.612	20.9561	20.5026	18.9609	18.907	20.8315
	0.209771	1.17676	K.LHKDN[+1694.603]TTC[+57.021]YEFK.K	HexNAc(3)Hex(4)Fuc(1)NeuAc(1)	C[+57], N[+1695]	>sp|Q07954|LRP1_HUMAN Prolow-density lipoprotein receptor-related protein 1 OS=Homo sapiens OX=9606 GN=LRP1 PE=1 SV=2	Color2 [DarkGray]	1	4		19.433	25.1186	23.2809	23.6057	18.8606	21.836
	0.300567	-1.48649	K.LHKDN[+2018.708]TTC[+57.021]YEFK.K	HexNAc(3)Hex(6)Fuc(1)NeuAc(1)	C[+57], N[+2019]	>sp|Q07954|LRP1_HUMAN Prolow-density lipoprotein receptor-related protein 1 OS=Homo sapiens OX=9606 GN=LRP1 PE=1 SV=2	Color2 [DarkGray]	1	4		18.7657	24.9425	19.3814	22.8509	21.6751	23.023
	0.26219	1.06657	K.LHKDN[+2059.735]TTC[+57.021]YEFK.K	HexNAc(4)Hex(5)Fuc(1)NeuAc(1)	C[+57], N[+2060]	>sp|Q07954|LRP1_HUMAN Prolow-density lipoprotein receptor-related protein 1 OS=Homo sapiens OX=9606 GN=LRP1 PE=1 SV=2	Color2 [DarkGray]	1	4		19.0527	19.0071	23.8852	19.453	19.4929	19.7993
	1.26451	-1.27466	K.LHVTLYN[+1540.529]C[+57.021]SFGR.S	HexNAc(2)Hex(7)	C[+57], N[+1541]	>sp|O15031|PLXB2_HUMAN Plexin-B2 OS=Homo sapiens OX=9606 GN=PLXNB2 PE=1 SV=3	Color2 [DarkGray]	1	4		20.1554	19.9155	19.9334	21.2584	22.0931	20.4767
	1.40667	-1.40518	K.LHVTLYN[+1872.651]C[+57.021]SFGR.S	HexNAc(3)Hex(6)NeuAc(1)	C[+57], N[+1873]	>sp|O15031|PLXB2_HUMAN Plexin-B2 OS=Homo sapiens OX=9606 GN=PLXNB2 PE=1 SV=3	Color2 [DarkGray]	1	4		19.3189	20.894	20.0258	21.6316	21.3046	21.5181
	0.927731	-3.79833	K.LIDNN[+1216.423]KTEK.E	HexNAc(2)Hex(5)	N[+1216]	>sp|P07602|SAP_HUMAN Prosaposin OS=Homo sapiens OX=9606 GN=PSAP PE=1 SV=2	Color2 [DarkGray]	1	4		19.409	18.8486	19.7158	25.3309	19.348	24.6895
	0.210321	1.07822	K.LIDNN[+1362.481]KTEK.E	HexNAc(2)Hex(5)Fuc(1)	N[+1362]	>sp|P07602|SAP_HUMAN Prosaposin OS=Homo sapiens OX=9606 GN=PSAP PE=1 SV=2	Color2 [DarkGray]	1	4		18.8502	18.8098	24.5472	20.664	18.7244	19.5842
	0.471512	-1.99188	K.LIDNN[+1378.476]KTEK.E	HexNAc(2)Hex(6)	N[+1378]	>sp|P07602|SAP_HUMAN Prosaposin OS=Homo sapiens OX=9606 GN=PSAP PE=1 SV=2	Color2 [DarkGray]	1	4		19.5541	19.569	19.6424	20.3973	19.1721	25.1717
	0.752996	-0.924973	K.LKELPGVC[+57.021]N[+2204.772]ETMMALWEEC[+57.021]KPC[+57.021]LK.Q	HexNAc(4)Hex(5)NeuAc(2)	C[+57]*3, N[+2205]	>sp|P10909|CLUS_HUMAN Clusterin OS=Homo sapiens OX=9606 GN=CLU PE=1 SV=1	Color2 [DarkGray]	1	4		23.5714	22.9959	23.6265	24.7368	24.9558	23.2762
+	3.25267	3.95933	K.LKVPESENN[+1216.423]K.T	HexNAc(2)Hex(5)	N[+1216]	>sp|Q5JRA6|TGO1_HUMAN Transport and Golgi organization protein 1 homolog OS=Homo sapiens OX=9606 GN=MIA3 PE=1 SV=1	Color2 [DarkGray]	1	4		23.5941	23.1213	23.7034	20.043	18.8451	19.6526
	0.267632	1.63534	K.LKVPESENN[+1378.476]K.T	HexNAc(2)Hex(6)	N[+1378]	>sp|Q5JRA6|TGO1_HUMAN Transport and Golgi organization protein 1 homolog OS=Homo sapiens OX=9606 GN=MIA3 PE=1 SV=1	Color2 [DarkGray]	1	4		25.5591	25.6169	19.8633	23.9481	23.1587	19.0265
+	2.49116	4.45553	K.LKVPESENN[+1540.529]K.T	HexNAc(2)Hex(7)	N[+1541]	>sp|Q5JRA6|TGO1_HUMAN Transport and Golgi organization protein 1 homolog OS=Homo sapiens OX=9606 GN=MIA3 PE=1 SV=1	Color2 [DarkGray]	1	4		23.8535	24.2375	23.5293	20.6548	18.3271	19.2718
+	4.99633	5.16642	K.LKVPESENN[+1702.581]K.T	HexNAc(2)Hex(8)	N[+1703]	>sp|Q5JRA6|TGO1_HUMAN Transport and Golgi organization protein 1 homolog OS=Homo sapiens OX=9606 GN=MIA3 PE=1 SV=1	Color2 [DarkGray]	1	4		24.934	24.9674	24.6034	19.4266	19.9305	19.6484
	0.28917	0.728216	K.LLDGDLTSDPSYFQN[+1540.529]VTGC[+57.021]SNYYNFLR.C	HexNAc(2)Hex(7)	C[+57], N[+1541]	>sp|Q9H3G5|CPVL_HUMAN Probable serine carboxypeptidase CPVL OS=Homo sapiens OX=9606 GN=CPVL PE=1 SV=2	Color2 [DarkGray]	1	4		19.8994	18.7087	22.0084	19.5531	18.8818	19.9971
	0.0796748	0.145952	K.LLDGDLTSDPSYFQN[+2204.772]VTGC[+57.021]SNYYNFLR.C	HexNAc(4)Hex(5)NeuAc(2)	C[+57], N[+2205]	>sp|Q9H3G5|CPVL_HUMAN Probable serine carboxypeptidase CPVL OS=Homo sapiens OX=9606 GN=CPVL PE=1 SV=2	Color2 [DarkGray]	1	4		19.2418	18.9288	20.7647	20.0886	19.0381	19.3707
	0.634536	-0.545987	K.LLHALGGDDFLGM[+15.995]LN[+1540.529]R.T	HexNAc(2)Hex(7)	M[+16], N[+1541]	>sp|Q9UHG3|PCYOX_HUMAN Prenylcysteine oxidase 1 OS=Homo sapiens OX=9606 GN=PCYOX1 PE=1 SV=3	Color2 [DarkGray]	1	4		19.1261	20.0933	19.3289	19.9408	19.6983	20.5472
	1.98193	-5.4883	K.LLHALGGDDFLGM[+15.995]LN[+1702.581]R.T	HexNAc(2)Hex(8)	M[+16], N[+1703]	>sp|Q9UHG3|PCYOX_HUMAN Prenylcysteine oxidase 1 OS=Homo sapiens OX=9606 GN=PCYOX1 PE=1 SV=3	Color2 [DarkGray]	1	4		20.5232	19.6195	18.0746	26.6748	24.6784	23.329
	0.464571	-0.431519	K.LLHALGGDDFLGM[+15.995]LN[+1864.634]R.T	HexNAc(2)Hex(9)	M[+16], N[+1865]	>sp|Q9UHG3|PCYOX_HUMAN Prenylcysteine oxidase 1 OS=Homo sapiens OX=9606 GN=PCYOX1 PE=1 SV=3	Color2 [DarkGray]	1	4		20.0784	19.0648	19.5402	20.4745	19.981	19.5225
	1.16086	-2.39186	K.LLHALGGDDFLGMLN[+1540.529]R.T	HexNAc(2)Hex(7)	N[+1541]	>sp|Q9UHG3|PCYOX_HUMAN Prenylcysteine oxidase 1 OS=Homo sapiens OX=9606 GN=PCYOX1 PE=1 SV=3	Color2 [DarkGray]	1	4		19.832	18.8539	19.5557	22.9046	22.5432	19.9693
	0.700334	-3.07978	K.LLHALGGDDFLGMLN[+1702.581]R.T	HexNAc(2)Hex(8)	N[+1703]	>sp|Q9UHG3|PCYOX_HUMAN Prenylcysteine oxidase 1 OS=Homo sapiens OX=9606 GN=PCYOX1 PE=1 SV=3	Color2 [DarkGray]	1	4		22.0612	20.6409	26.3672	26.9954	27.2609	24.0522
+	2.74352	5.00912	K.LLHALGGDDFLGMLN[+1864.634]R.T	HexNAc(2)Hex(9)	N[+1865]	>sp|Q9UHG3|PCYOX_HUMAN Prenylcysteine oxidase 1 OS=Homo sapiens OX=9606 GN=PCYOX1 PE=1 SV=3	Color2 [DarkGray]	1	4		26.4746	25.5077	27.3323	20.6608	22.1438	21.4826
	0.106543	0.27555	K.LLN[+1378.476]GSQR.V	HexNAc(2)Hex(6)	N[+1378]	>sp|Q32P28|P3H1_HUMAN Prolyl 3-hydroxylase 1 OS=Homo sapiens OX=9606 GN=P3H1 PE=1 SV=2	Color2 [DarkGray]	1	4		20.3672	21.9811	18.9889	19.5061	20.3065	20.6979
	0.761131	2.66297	K.LLN[+2457.877]GSQR.V	HexNAc(5)Hex(8)Fuc(1)	N[+2458]	>sp|Q32P28|P3H1_HUMAN Prolyl 3-hydroxylase 1 OS=Homo sapiens OX=9606 GN=P3H1 PE=1 SV=2	Color2 [DarkGray]	1	4		24.376	23.8173	19.4157	20.1381	20.3203	19.1617
+	2.61177	-2.95929	K.LLNN[+1702.581]LTSIK.I	HexNAc(2)Hex(8)	N[+1703]	>sp|P11047|LAMC1_HUMAN Laminin subunit gamma-1 OS=Homo sapiens OX=9606 GN=LAMC1 PE=1 SV=3	Color2 [DarkGray]	1	4		19.817	20.5701	20.0912	23.7296	22.4349	23.1918
	0.972154	-1.03178	K.LLQVVYLHSNN[+1241.454]ITK.V	HexNAc(3)Hex(3)Fuc(1)	N[+1241]	>sp|P21810|PGS1_HUMAN Biglycan OS=Homo sapiens OX=9606 GN=BGN PE=1 SV=2	Color2 [DarkGray]	1	4		19.6217	19.7552	18.8133	20.6969	19.6401	20.9485
+	2.54679	-4.87337	K.LLQVVYLHSNN[+1403.507]ITK.V	HexNAc(3)Hex(4)Fuc(1)	N[+1404]	>sp|P21810|PGS1_HUMAN Biglycan OS=Homo sapiens OX=9606 GN=BGN PE=1 SV=2	Color2 [DarkGray]	1	4		18.4407	19.7168	20.5219	25.2819	23.8391	24.1785
+	2.07278	-2.4598	K.LLQVVYLHSNN[+1606.587]ITK.V	HexNAc(4)Hex(4)Fuc(1)	N[+1607]	>sp|P21810|PGS1_HUMAN Biglycan OS=Homo sapiens OX=9606 GN=BGN PE=1 SV=2	Color2 [DarkGray]	1	4		19.8383	19.6104	19.2583	21.7685	22.96	21.3579
	0.491886	-0.604918	K.LLQVVYLHSNN[+1622.582]ITK.V	HexNAc(4)Hex(5)	N[+1623]	>sp|P21810|PGS1_HUMAN Biglycan OS=Homo sapiens OX=9606 GN=BGN PE=1 SV=2	Color2 [DarkGray]	1	4		18.9491	19.8081	19.1391	20.2979	18.9705	20.4426
+	2.66758	-4.28287	K.LLQVVYLHSNN[+1694.603]ITK.V	HexNAc(3)Hex(4)Fuc(1)NeuAc(1)	N[+1695]	>sp|P21810|PGS1_HUMAN Biglycan OS=Homo sapiens OX=9606 GN=BGN PE=1 SV=2	Color2 [DarkGray]	1	4		20.8007	22.6229	20.9368	25.4196	25.9711	25.8184
+	3.24001	-8.04866	K.LLQVVYLHSNN[+1768.640]ITK.V	HexNAc(4)Hex(5)Fuc(1)	N[+1769]	>sp|P21810|PGS1_HUMAN Biglycan OS=Homo sapiens OX=9606 GN=BGN PE=1 SV=2	Color2 [DarkGray]	1	4		22.0154	20.0832	22.3865	29.953	29.8978	28.7802
	1.81624	-5.18351	K.LLQVVYLHSNN[+1809.666]ITK.V	HexNAc(5)Hex(4)Fuc(1)	N[+1810]	>sp|P21810|PGS1_HUMAN Biglycan OS=Homo sapiens OX=9606 GN=BGN PE=1 SV=2	Color2 [DarkGray]	1	4		20.2521	18.1466	19.3087	25.7693	25.2919	22.1966
	0.262102	-1.31381	K.LLQVVYLHSNN[+1850.693]ITK.V	HexNAc(6)Hex(3)Fuc(1)	N[+1851]	>sp|P21810|PGS1_HUMAN Biglycan OS=Homo sapiens OX=9606 GN=BGN PE=1 SV=2	Color2 [DarkGray]	1	4		19.953	20.4409	20.3021	25.4624	20.2339	18.9411
	0.179887	-0.713637	K.LLQVVYLHSNN[+1897.682]ITK.V	HexNAc(4)Hex(4)Fuc(1)NeuAc(1)	N[+1898]	>sp|P21810|PGS1_HUMAN Biglycan OS=Homo sapiens OX=9606 GN=BGN PE=1 SV=2	Color2 [DarkGray]	1	4		21.3494	20.1942	19.0999	23.2179	21.0605	18.5061
	1.2457	-1.70796	K.LLQVVYLHSNN[+1913.677]ITK.V	HexNAc(4)Hex(5)NeuAc(1)	N[+1914]	>sp|P21810|PGS1_HUMAN Biglycan OS=Homo sapiens OX=9606 GN=BGN PE=1 SV=2	Color2 [DarkGray]	1	4		19.6469	19.7469	19.1293	22.4253	20.4215	20.8001
	1.03627	-2.11363	K.LLQVVYLHSNN[+1971.719]ITK.V	HexNAc(5)Hex(5)Fuc(1)	N[+1972]	>sp|P21810|PGS1_HUMAN Biglycan OS=Homo sapiens OX=9606 GN=BGN PE=1 SV=2	Color2 [DarkGray]	1	4		19.1849	19.4789	18.2879	21.7729	22.1831	19.3365
	0.523727	-0.867207	K.LLQVVYLHSNN[+2026.687]ITK.V	HexNAc(2)Hex(10)	N[+2027]	>sp|P21810|PGS1_HUMAN Biglycan OS=Homo sapiens OX=9606 GN=BGN PE=1 SV=2	Color2 [DarkGray]	1	4		19.946	19.4723	20.7715	22.1689	20.3962	20.2262
+	3.38608	-4.39837	K.LLQVVYLHSNN[+2059.735]ITK.V	HexNAc(4)Hex(5)Fuc(1)NeuAc(1)	N[+2060]	>sp|P21810|PGS1_HUMAN Biglycan OS=Homo sapiens OX=9606 GN=BGN PE=1 SV=2	Color2 [DarkGray]	1	4		27.1817	26.5191	26.6668	31.4272	31.6422	30.4933
	1.90197	-4.04368	K.LLQVVYLHSNN[+2100.761]ITK.V	HexNAc(5)Hex(4)Fuc(1)NeuAc(1)	N[+2101]	>sp|P21810|PGS1_HUMAN Biglycan OS=Homo sapiens OX=9606 GN=BGN PE=1 SV=2	Color2 [DarkGray]	1	4		20.0962	19.4982	22.4163	24.7589	25.2028	24.1801
+	2.62026	-5.55221	K.LLQVVYLHSNN[+2133.772]ITK.V	HexNAc(5)Hex(6)Fuc(1)	N[+2134]	>sp|P21810|PGS1_HUMAN Biglycan OS=Homo sapiens OX=9606 GN=BGN PE=1 SV=2	Color2 [DarkGray]	1	4		18.4491	18.3618	20.1508	25.6611	24.1162	23.841
+	3.65426	-7.37908	K.LLQVVYLHSNN[+2141.788]ITK.V	HexNAc(6)Hex(3)Fuc(1)NeuAc(1)	N[+2142]	>sp|P21810|PGS1_HUMAN Biglycan OS=Homo sapiens OX=9606 GN=BGN PE=1 SV=2	Color2 [DarkGray]	1	4		19.789	18.4566	19.0859	27.2675	26.44	25.7611
	0.655277	-2.3224	K.LLQVVYLHSNN[+2204.772]ITK.V	HexNAc(4)Hex(5)NeuAc(2)	N[+2205]	>sp|P21810|PGS1_HUMAN Biglycan OS=Homo sapiens OX=9606 GN=BGN PE=1 SV=2	Color2 [DarkGray]	1	4		19.3398	19.7168	19.7344	24.9341	21.3342	19.4898
+	3.61139	-3.40038	K.LLQVVYLHSNN[+2350.830]ITK.V	HexNAc(4)Hex(5)Fuc(1)NeuAc(2)	N[+2351]	>sp|P21810|PGS1_HUMAN Biglycan OS=Homo sapiens OX=9606 GN=BGN PE=1 SV=2	Color2 [DarkGray]	1	4		29.1489	28.4568	28.246	31.9675	32.0791	32.0062
	0.210461	-0.845044	K.LLQVVYLHSNN[+2352.846]ITK.V	HexNAc(6)Hex(7)	N[+2353]	>sp|P21810|PGS1_HUMAN Biglycan OS=Homo sapiens OX=9606 GN=BGN PE=1 SV=2	Color2 [DarkGray]	1	4		18.6754	19.0972	19.8642	18.0288	19.1183	23.0248
	0.299677	1.36809	K.LLQVVYLHSNN[+2391.857]ITK.V	HexNAc(5)Hex(4)Fuc(1)NeuAc(2)	N[+2392]	>sp|P21810|PGS1_HUMAN Biglycan OS=Homo sapiens OX=9606 GN=BGN PE=1 SV=2	Color2 [DarkGray]	1	4		22.5556	20.9189	22.7668	18.3573	24.1551	19.6247
	0.790711	-2.50727	K.LLQVVYLHSNN[+2393.873]ITK.V	HexNAc(7)Hex(6)	N[+2394]	>sp|P21810|PGS1_HUMAN Biglycan OS=Homo sapiens OX=9606 GN=BGN PE=1 SV=2	Color2 [DarkGray]	1	4		18.8204	18.9237	20.0145	24.5795	20.1793	20.5216
+	2.83697	-7.69911	K.LLQVVYLHSNN[+2424.867]ITK.V	HexNAc(5)Hex(6)Fuc(1)NeuAc(1)	N[+2425]	>sp|P21810|PGS1_HUMAN Biglycan OS=Homo sapiens OX=9606 GN=BGN PE=1 SV=2	Color2 [DarkGray]	1	4		18.9119	17.9663	19.0973	27.1587	27.3963	24.5177
+	2.93867	-6.44452	K.LLQVVYLHSNN[+2432.884]ITK.V	HexNAc(6)Hex(3)Fuc(1)NeuAc(2)	N[+2433]	>sp|P21810|PGS1_HUMAN Biglycan OS=Homo sapiens OX=9606 GN=BGN PE=1 SV=2	Color2 [DarkGray]	1	4		18.4248	19.1661	19.1033	26.3462	25.7816	23.9
	0.802637	1.2166	K.LLQVVYLHSNN[+2715.963]ITK.V	HexNAc(5)Hex(6)Fuc(1)NeuAc(2)	N[+2716]	>sp|P21810|PGS1_HUMAN Biglycan OS=Homo sapiens OX=9606 GN=BGN PE=1 SV=2	Color2 [DarkGray]	1	4		26.2095	27.7141	27.6557	26.8385	25.1104	25.9807
	1.06195	-1.63177	K.LLQVVYLHSNN[+3007.058]ITK.V	HexNAc(5)Hex(6)Fuc(1)NeuAc(3)	N[+3007]	>sp|P21810|PGS1_HUMAN Biglycan OS=Homo sapiens OX=9606 GN=BGN PE=1 SV=2	Color2 [DarkGray]	1	4		19.3073	18.8997	19.8684	21.6205	21.69	19.6603
	1.52275	-4.15514	K.LN[+1378.476]ITC[+57.021]ESSK.K	HexNAc(2)Hex(6)	C[+57], N[+1378]	>sp|Q4KMQ2|ANO6_HUMAN Anoctamin-6 OS=Homo sapiens OX=9606 GN=ANO6 PE=1 SV=2	Color2 [DarkGray]	1	4		19.3662	22.132	22.4351	26.4213	26.0932	23.8842
	0.219128	-0.306495	K.LN[+1540.529]ITC[+57.021]ESSK.K	HexNAc(2)Hex(7)	C[+57], N[+1541]	>sp|Q4KMQ2|ANO6_HUMAN Anoctamin-6 OS=Homo sapiens OX=9606 GN=ANO6 PE=1 SV=2	Color2 [DarkGray]	1	4		23.6095	23.8055	23.7777	25.0887	23.7361	23.2874
	1.33873	1.94883	K.LN[+1694.603]QTEPVAGNYYPVNTR.I	HexNAc(3)Hex(4)Fuc(1)NeuAc(1)	N[+1695]	>sp|O00754|MA2B1_HUMAN Lysosomal alpha-mannosidase OS=Homo sapiens OX=9606 GN=MAN2B1 PE=1 SV=3	Color2 [DarkGray]	1	4		20.5876	21.9705	22.8171	20.1552	19.4602	19.9132
	0.555089	2.67336	K.LN[+1702.581]FTGPGDPDSIR.C	HexNAc(2)Hex(8)	N[+1703]	>sp|P05107|ITB2_HUMAN Integrin beta-2 OS=Homo sapiens OX=9606 GN=ITGB2 PE=1 SV=2	Color2 [DarkGray]	1	4		24.1946	24.8157	24.9989	22.5823	25.3404	18.0664
	0.833469	-1.35856	K.LN[+1702.581]ITC[+57.021]ESSK.K	HexNAc(2)Hex(8)	C[+57], N[+1703]	>sp|Q4KMQ2|ANO6_HUMAN Anoctamin-6 OS=Homo sapiens OX=9606 GN=ANO6 PE=1 SV=2	Color2 [DarkGray]	1	4		18.4485	19.7946	19.4873	21.8696	20.0775	19.859
	1.80947	1.17206	K.LN[+1864.634]FTGPGDPDSIR.C	HexNAc(2)Hex(9)	N[+1865]	>sp|P05107|ITB2_HUMAN Integrin beta-2 OS=Homo sapiens OX=9606 GN=ITGB2 PE=1 SV=2	Color2 [DarkGray]	1	4		21.0623	21.1628	20.9734	20.2954	20.0425	19.3444
	1.10544	2.56231	K.LN[+2204.772]LTTDPK.F	HexNAc(4)Hex(5)NeuAc(2)	N[+2205]	>sp|Q92896|GSLG1_HUMAN Golgi apparatus protein 1 OS=Homo sapiens OX=9606 GN=GLG1 PE=1 SV=2	Color2 [DarkGray]	1	4		22.5108	21.5701	19.0874	18.1747	18.0537	19.2529
	0.227639	0.611706	K.LN[+2350.830]QTEPVAGNYYPVNTR.I	HexNAc(4)Hex(5)Fuc(1)NeuAc(2)	N[+2351]	>sp|O00754|MA2B1_HUMAN Lysosomal alpha-mannosidase OS=Homo sapiens OX=9606 GN=MAN2B1 PE=1 SV=3	Color2 [DarkGray]	1	4		21.6488	20.2456	18.6013	19.4331	20.6044	18.6231
	0.241417	0.513835	K.LN[+2715.963]FTGPGDPDSIR.C	HexNAc(5)Hex(6)Fuc(1)NeuAc(2)	N[+2716]	>sp|P05107|ITB2_HUMAN Integrin beta-2 OS=Homo sapiens OX=9606 GN=ITGB2 PE=1 SV=2	Color2 [DarkGray]	1	4		20.0936	21.8943	19.0819	19.658	19.6915	20.1788
	0.0136107	0.0179965	K.LNAAKALPQPQN[+1702.581]VTSLLGC[+57.021]TH.-	HexNAc(2)Hex(8)	C[+57], N[+1703]	>sp|P02790|HEMO_HUMAN Hemopexin OS=Homo sapiens OX=9606 GN=HPX PE=1 SV=2	Color2 [DarkGray]	1	4		20.2157	19.4585	19.0783	20.0316	19.6092	19.0578
	0.918557	0.890852	K.LNAENN[+2204.772]ATFYFK.I	HexNAc(4)Hex(5)NeuAc(2)	N[+2205]	>sp|P01042|KNG1_HUMAN Kininogen-1 OS=Homo sapiens OX=9606 GN=KNG1 PE=1 SV=2	Color2 [DarkGray]	1	4		24.5409	24.7505	24.7089	22.8917	24.3476	24.0885
	0.16409	0.605479	K.LNAENN[+3007.058]ATFYFK.I	HexNAc(5)Hex(6)Fuc(1)NeuAc(3)	N[+3007]	>sp|P01042|KNG1_HUMAN Kininogen-1 OS=Homo sapiens OX=9606 GN=KNG1 PE=1 SV=2	Color2 [DarkGray]	1	4		18.9452	23.001	18.8634	20.1661	19.3779	19.4491
	0.0506547	-0.174186	K.LNN[+1987.714]LTFLYLDHNALESVPLNLPESLR.V	HexNAc(5)Hex(6)	N[+1988]	>sp|P20774|MIME_HUMAN Mimecan OS=Homo sapiens OX=9606 GN=OGN PE=1 SV=1	Color2 [DarkGray]	1	4		19.2416	20.0621	19.0707	19.6809	21.5838	17.6322
	0.463581	-2.06803	K.LNN[+2059.735]LTFLYLDHNALESVPLNLPESLR.V	HexNAc(4)Hex(5)Fuc(1)NeuAc(1)	N[+2060]	>sp|P20774|MIME_HUMAN Mimecan OS=Homo sapiens OX=9606 GN=OGN PE=1 SV=1	Color2 [DarkGray]	1	4		20.2156	19.0356	20.0422	18.5078	25.0626	21.9271
	0.938521	-2.85517	K.LNN[+2424.867]LTFLYLDHNALESVPLNLPESLR.V	HexNAc(5)Hex(6)Fuc(1)NeuAc(1)	N[+2425]	>sp|P20774|MIME_HUMAN Mimecan OS=Homo sapiens OX=9606 GN=OGN PE=1 SV=1	Color2 [DarkGray]	1	4		19.4659	18.4995	19.9768	19.5395	24.0519	22.9163
	0.698878	-0.641198	K.LPTQN[+2204.772]ITFQTESSVAEQEAEFQSPK.Y	HexNAc(4)Hex(5)NeuAc(2)	N[+2205]	>sp|Q14624|ITIH4_HUMAN Inter-alpha-trypsin inhibitor heavy chain H4 OS=Homo sapiens OX=9606 GN=ITIH4 PE=1 SV=4	Color2 [DarkGray]	1	4		23.8192	23.1657	23.1958	24.1406	23.3651	24.5985
	1.66644	1.69436	K.LQAPLN[+1913.677]YTEFQKPIC[+57.021]LPSK.G	HexNAc(4)Hex(5)NeuAc(1)	C[+57], N[+1914]	>sp|P03952|KLKB1_HUMAN Plasma kallikrein OS=Homo sapiens OX=9606 GN=KLKB1 PE=1 SV=1	Color2 [DarkGray]	1	4		22.0577	21.6627	21.0303	19.8528	19.2967	20.518
	0.184503	0.480366	K.LQAPLN[+2204.772]YTEFQKPIC[+57.021]LPSK.G	HexNAc(4)Hex(5)NeuAc(2)	C[+57], N[+2205]	>sp|P03952|KLKB1_HUMAN Plasma kallikrein OS=Homo sapiens OX=9606 GN=KLKB1 PE=1 SV=1	Color2 [DarkGray]	1	4		22.0817	24.8075	24.7789	23.5106	22.6511	24.0654
	1.94239	3.03146	K.LQFDDN[+1378.476]GTYTC[+57.021]QVK.N	HexNAc(2)Hex(6)	C[+57], N[+1378]	>sp|O60487|MPZL2_HUMAN Myelin protein zero-like protein 2 OS=Homo sapiens OX=9606 GN=MPZL2 PE=1 SV=1	Color2 [DarkGray]	1	4		22.5881	20.9372	23.2107	19.0356	19.3229	19.2831
	2.16127	1.911	K.LQFDDN[+1540.529]GTYTC[+57.021]QVK.N	HexNAc(2)Hex(7)	C[+57], N[+1541]	>sp|O60487|MPZL2_HUMAN Myelin protein zero-like protein 2 OS=Homo sapiens OX=9606 GN=MPZL2 PE=1 SV=1	Color2 [DarkGray]	1	4		21.8797	21.4979	21.5312	19.3252	19.4218	20.4289
	0.400533	0.843686	K.LQFDDN[+1872.651]GTYTC[+57.021]QVK.N	HexNAc(3)Hex(6)NeuAc(1)	C[+57], N[+1873]	>sp|O60487|MPZL2_HUMAN Myelin protein zero-like protein 2 OS=Homo sapiens OX=9606 GN=MPZL2 PE=1 SV=1	Color2 [DarkGray]	1	4		21.8522	19.4766	19.7821	19.5366	20.367	18.6763
	0.121922	0.361327	K.LQGLENWGQDPGVSAN[+1378.476]ASK.A	HexNAc(2)Hex(6)	N[+1378]	>sp|Q96AQ6|PBIP1_HUMAN Pre-B-cell leukemia transcription factor-interacting protein 1 OS=Homo sapiens OX=9606 GN=PBXIP1 PE=1 SV=1	Color2 [DarkGray]	1	4		20.9431	20.8479	18.2504	18.5814	20.7521	19.624
	0.253396	0.678396	K.LQGLENWGQDPGVSAN[+1540.529]ASK.A	HexNAc(2)Hex(7)	N[+1541]	>sp|Q96AQ6|PBIP1_HUMAN Pre-B-cell leukemia transcription factor-interacting protein 1 OS=Homo sapiens OX=9606 GN=PBXIP1 PE=1 SV=1	Color2 [DarkGray]	1	4		19.6166	19.8872	21.6245	18.0523	20.1078	20.9331
	0.971606	-0.362637	K.LQGLENWGQDPGVSAN[+1702.581]ASK.A	HexNAc(2)Hex(8)	N[+1703]	>sp|Q96AQ6|PBIP1_HUMAN Pre-B-cell leukemia transcription factor-interacting protein 1 OS=Homo sapiens OX=9606 GN=PBXIP1 PE=1 SV=1	Color2 [DarkGray]	1	4		21.4987	21.7123	21.5549	21.8193	22.2749	21.7596
	0.491578	-2.04602	K.LQKNN[+2059.735]ITK.K	HexNAc(4)Hex(5)Fuc(1)NeuAc(1)	N[+2060]	>sp|Q6ZMW3|EMAL6_HUMAN Echinoderm microtubule-associated protein-like 6 OS=Homo sapiens OX=9606 GN=EML6 PE=2 SV=2	Color2 [DarkGray]	1	4		18.9063	19.309	19.6819	20.3343	18.8581	24.8429
	0.300423	1.09329	K.LQKNN[+2262.814]ITK.K	HexNAc(5)Hex(5)Fuc(1)NeuAc(1)	N[+2263]	>sp|Q6ZMW3|EMAL6_HUMAN Echinoderm microtubule-associated protein-like 6 OS=Homo sapiens OX=9606 GN=EML6 PE=2 SV=2	Color2 [DarkGray]	1	4		23.6485	20.7721	18.684	20.2574	20.304	19.2633
	0.433035	2.87842	K.LQKNN[+2586.920]ITK.K	HexNAc(5)Hex(7)Fuc(1)NeuAc(1)	N[+2587]	>sp|Q6ZMW3|EMAL6_HUMAN Echinoderm microtubule-associated protein-like 6 OS=Homo sapiens OX=9606 GN=EML6 PE=2 SV=2	Color2 [DarkGray]	1	4		27.8049	18.5847	20.4859	18.6854	20.2164	19.3384
	0.914218	-1.30222	K.LQLSGHAM[+15.995]PRLAVTN[+2717.978]TTMTGTVLK.M	HexNAc(7)Hex(8)	M[+16], N[+2718]	>sp|Q13586|STIM1_HUMAN Stromal interaction molecule 1 OS=Homo sapiens OX=9606 GN=STIM1 PE=1 SV=3	Color2 [DarkGray]	1	4		19.995	20.0605	18.705	20.1418	21.8319	20.6935
	0.630099	-1.4149	K.LRNPC[+57.021]TSEQN[+1216.423]C[+57.021]TSPFSYK.N	HexNAc(2)Hex(5)	C[+57]*2, N[+1216]	>sp|P05556|ITB1_HUMAN Integrin beta-1 OS=Homo sapiens OX=9606 GN=ITGB1 PE=1 SV=2	Color2 [DarkGray]	1	4		18.7008	18.0398	20.4153	19.9281	21.897	19.5755
	0.505248	0.961636	K.LRNPC[+57.021]TSEQN[+1702.581]C[+57.021]TSPFSYK.N	HexNAc(2)Hex(8)	C[+57]*2, N[+1703]	>sp|P05556|ITB1_HUMAN Integrin beta-1 OS=Homo sapiens OX=9606 GN=ITGB1 PE=1 SV=2	Color2 [DarkGray]	1	4		19.0102	21.0435	21.7798	19.6078	19.8144	19.5265
+	3.41424	-2.66246	K.LRNPC[+57.021]TSEQN[+1768.640]C[+57.021]TSPFSYK.N	HexNAc(4)Hex(5)Fuc(1)	C[+57]*2, N[+1769]	>sp|P05556|ITB1_HUMAN Integrin beta-1 OS=Homo sapiens OX=9606 GN=ITGB1 PE=1 SV=2	Color2 [DarkGray]	1	4		20.0971	19.3287	19.5865	22.3084	22.1984	22.4928
	0.492314	-0.492748	K.LRNPC[+57.021]TSEQN[+1864.634]C[+57.021]TSPFSYK.N	HexNAc(2)Hex(9)	C[+57]*2, N[+1865]	>sp|P05556|ITB1_HUMAN Integrin beta-1 OS=Homo sapiens OX=9606 GN=ITGB1 PE=1 SV=2	Color2 [DarkGray]	1	4		19.5899	19.7917	19.8755	20.2149	19.5194	21.0011
	1.16177	-2.23156	K.LRNPC[+57.021]TSEQN[+2059.735]C[+57.021]TSPFSYK.N	HexNAc(4)Hex(5)Fuc(1)NeuAc(1)	C[+57]*2, N[+2060]	>sp|P05556|ITB1_HUMAN Integrin beta-1 OS=Homo sapiens OX=9606 GN=ITGB1 PE=1 SV=2	Color2 [DarkGray]	1	4		17.5934	19.7934	19.2739	22.2992	20.2458	20.8105
+	6.08749	5.25745	K.LSDLSIN[+2204.772]STEC[+57.021]LHVHC[+57.021]R.G	HexNAc(4)Hex(5)NeuAc(2)	C[+57]*2, N[+2205]	>sp|P05156|CFAI_HUMAN Complement factor I OS=Homo sapiens OX=9606 GN=CFI PE=1 SV=2	Color2 [DarkGray]	1	4		24.6491	24.954	24.8911	19.6121	19.4946	19.6152
	0.568982	0.991477	K.LSDLSIN[+2350.830]STEC[+57.021]LHVHC[+57.021]R.G	HexNAc(4)Hex(5)Fuc(1)NeuAc(2)	C[+57]*2, N[+2351]	>sp|P05156|CFAI_HUMAN Complement factor I OS=Homo sapiens OX=9606 GN=CFI PE=1 SV=2	Color2 [DarkGray]	1	4		18.7394	20.606	20.6871	18.4002	18.7824	19.8755
	1.02944	-5.01337	K.LSHDAN[+1768.640]ETLPLHLYVK.S	HexNAc(4)Hex(5)Fuc(1)	N[+1769]	>sp|O15031|PLXB2_HUMAN Plexin-B2 OS=Homo sapiens OX=9606 GN=PLXNB2 PE=1 SV=3	Color2 [DarkGray]	1	4		18.4741	19.436	18.1479	26.2058	25.6907	19.2015
	0.266097	-1.40338	K.LSHDAN[+2059.735]ETLPLHLYVK.S	HexNAc(4)Hex(5)Fuc(1)NeuAc(1)	N[+2060]	>sp|O15031|PLXB2_HUMAN Plexin-B2 OS=Homo sapiens OX=9606 GN=PLXNB2 PE=1 SV=3	Color2 [DarkGray]	1	4		19.7491	19.5194	18.7457	24.827	19.4246	17.9727
	0.729044	-0.876704	K.LSHDAN[+2350.830]ETLPLHLYVK.S	HexNAc(4)Hex(5)Fuc(1)NeuAc(2)	N[+2351]	>sp|O15031|PLXB2_HUMAN Plexin-B2 OS=Homo sapiens OX=9606 GN=PLXNB2 PE=1 SV=3	Color2 [DarkGray]	1	4		19.0491	18.3939	19.2142	20.1887	20.3144	18.7842
	0.378285	-1.00044	K.LSISFPN[+1378.476]MTSNGYPVLYPTGLSSSENANC[+57.021]RPHIFEDPFSINSGK.K	HexNAc(2)Hex(6)	C[+57], N[+1378]	>sp|P56199|ITA1_HUMAN Integrin alpha-1 OS=Homo sapiens OX=9606 GN=ITGA1 PE=1 SV=2	Color2 [DarkGray]	1	4		18.4196	19.6131	20.21	19.7585	22.3379	19.1476
	0.59883	-1.3201	K.LSISFPN[+1540.529]MTSNGYPVLYPTGLSSSENANC[+57.021]RPHIFEDPFSINSGK.K	HexNAc(2)Hex(7)	C[+57], N[+1541]	>sp|P56199|ITA1_HUMAN Integrin alpha-1 OS=Homo sapiens OX=9606 GN=ITGA1 PE=1 SV=2	Color2 [DarkGray]	1	4		19.6352	17.2078	19.7291	20.3517	21.0145	19.1662
	0.19916	0.373216	K.LSQGN[+1378.476]TTLSINPVK.R	HexNAc(2)Hex(6)	N[+1378]	>sp|P13688|CEAM1_HUMAN Carcinoembryonic antigen-related cell adhesion molecule 1 OS=Homo sapiens OX=9606 GN=CEACAM1 PE=1 SV=2	Color2 [DarkGray]	1	4		21.3908	20.5517	19.998	21.467	19.7098	19.644
	0.496359	2.10578	K.LSQGN[+1378.476]TTLSINPVKR.E	HexNAc(2)Hex(6)	N[+1378]	>sp|P13688|CEAM1_HUMAN Carcinoembryonic antigen-related cell adhesion molecule 1 OS=Homo sapiens OX=9606 GN=CEACAM1 PE=1 SV=2	Color2 [DarkGray]	1	4		19.5581	22.7412	24.5412	22.3547	19.6766	18.4918
	1.69161	1.96335	K.LSQGN[+1540.529]TTLSINPVK.R	HexNAc(2)Hex(7)	N[+1541]	>sp|P13688|CEAM1_HUMAN Carcinoembryonic antigen-related cell adhesion molecule 1 OS=Homo sapiens OX=9606 GN=CEACAM1 PE=1 SV=2	Color2 [DarkGray]	1	4		21.6049	20.2353	20.6995	18.8173	19.5026	18.3298
	0.233768	-0.479673	K.LSYIRIADTN[+3048.084]ITSIPQGLPPSLTELHLDGNK.I	HexNAc(6)Hex(5)Fuc(1)NeuAc(3)	N[+3048]	>sp|P07585|PGS2_HUMAN Decorin OS=Homo sapiens OX=9606 GN=DCN PE=1 SV=1	Color2 [DarkGray]	1	4		17.8947	19.6381	19.2989	20.3711	18.3011	19.5984
	0.235544	-0.0975787	K.LTLQPVDN[+1702.581]STISLQMGTNK.V	HexNAc(2)Hex(8)	N[+1703]	>sp|Q15417|CNN3_HUMAN Calponin-3 OS=Homo sapiens OX=9606 GN=CNN3 PE=1 SV=1	Color2 [DarkGray]	1	4		19.5345	19.4646	19.8612	19.5042	19.8006	19.8483
	0.699548	1.12711	K.LTLQPVDN[+1864.634]STISLQMGTNK.V	HexNAc(2)Hex(9)	N[+1865]	>sp|Q15417|CNN3_HUMAN Calponin-3 OS=Homo sapiens OX=9606 GN=CNN3 PE=1 SV=1	Color2 [DarkGray]	1	4		19.9932	20.6524	20.4515	20.5669	18.1485	19.0004
+	2.68612	2.90503	K.LTN[+1540.529]NSNQFQTEVGK.Q	HexNAc(2)Hex(7)	N[+1541]	>sp|P05107|ITB2_HUMAN Integrin beta-2 OS=Homo sapiens OX=9606 GN=ITGB2 PE=1 SV=2	Color2 [DarkGray]	1	4		24.5363	25.1561	24.6779	21.7164	22.5802	21.3586
	0.226862	1.15176	K.LTN[+1702.581]NSNQFQTEVGK.Q	HexNAc(2)Hex(8)	N[+1703]	>sp|P05107|ITB2_HUMAN Integrin beta-2 OS=Homo sapiens OX=9606 GN=ITGB2 PE=1 SV=2	Color2 [DarkGray]	1	4		19.4324	25.8496	24.6122	22.5874	22.2427	21.6087
	0.96526	2.58375	K.LTN[+1864.634]NSNQFQTEVGK.Q	HexNAc(2)Hex(9)	N[+1865]	>sp|P05107|ITB2_HUMAN Integrin beta-2 OS=Homo sapiens OX=9606 GN=ITGB2 PE=1 SV=2	Color2 [DarkGray]	1	4		24.0417	23.2478	24.1586	22.7265	18.8134	22.1569
	0.75589	2.22226	K.LTN[+2026.687]NSNQFQTEVGK.Q	HexNAc(2)Hex(10)	N[+2027]	>sp|P05107|ITB2_HUMAN Integrin beta-2 OS=Homo sapiens OX=9606 GN=ITGB2 PE=1 SV=2	Color2 [DarkGray]	1	4		18.7029	22.0052	22.9698	18.3287	18.9808	19.7016
	0.586828	1.95721	K.LTN[+2059.735]NSNQFQTEVGK.Q	HexNAc(4)Hex(5)Fuc(1)NeuAc(1)	N[+2060]	>sp|P05107|ITB2_HUMAN Integrin beta-2 OS=Homo sapiens OX=9606 GN=ITGB2 PE=1 SV=2	Color2 [DarkGray]	1	4		19.5065	20.1084	24.0535	19.6922	18.4102	19.6943
	0.43169	1.17722	K.LTN[+3007.058]NSNQFQTEVGK.Q	HexNAc(5)Hex(6)Fuc(1)NeuAc(3)	N[+3007]	>sp|P05107|ITB2_HUMAN Integrin beta-2 OS=Homo sapiens OX=9606 GN=ITGB2 PE=1 SV=2	Color2 [DarkGray]	1	4		19.498	23.2478	21.0252	20.9013	19.8194	19.5187
	0.335816	0.937063	K.LTQELKDHN[+2350.830]ATSILQQLPLLSAMR.E	HexNAc(4)Hex(5)Fuc(1)NeuAc(2)	N[+2351]	>sp|Q8TDL5|BPIB1_HUMAN BPI fold-containing family B member 1 OS=Homo sapiens OX=9606 GN=BPIFB1 PE=1 SV=1	Color2 [DarkGray]	1	4		19.903	19.2911	22.803	19.8673	20.3265	18.992
	1.44093	-2.36573	K.LTQGIC[+57.021]LEQN[+1403.507]K.T	HexNAc(3)Hex(4)Fuc(1)	C[+57], N[+1404]	>sp|P28906|CD34_HUMAN Hematopoietic progenitor cell antigen CD34 OS=Homo sapiens OX=9606 GN=CD34 PE=1 SV=2	Color2 [DarkGray]	1	4		19.5624	17.7095	18.4619	20.9032	21.9008	20.0269
	0.41517	-1.49643	K.LTQGIC[+57.021]LEQN[+1419.502]K.T	HexNAc(3)Hex(5)	C[+57], N[+1420]	>sp|P28906|CD34_HUMAN Hematopoietic progenitor cell antigen CD34 OS=Homo sapiens OX=9606 GN=CD34 PE=1 SV=2	Color2 [DarkGray]	1	4		19.6077	19.9384	18.9846	21.0546	18.3712	23.5941
	0.791603	-3.69916	K.LTQGIC[+57.021]LEQN[+1548.545]K.T	HexNAc(3)Hex(4)NeuAc(1)	C[+57], N[+1549]	>sp|P28906|CD34_HUMAN Hematopoietic progenitor cell antigen CD34 OS=Homo sapiens OX=9606 GN=CD34 PE=1 SV=2	Color2 [DarkGray]	1	4		19.666	20.2614	18.1775	26.7623	22.8245	19.6156
+	2.99262	-4.57492	K.LTQGIC[+57.021]LEQN[+1565.560]K.T	HexNAc(3)Hex(5)Fuc(1)	C[+57], N[+1566]	>sp|P28906|CD34_HUMAN Hematopoietic progenitor cell antigen CD34 OS=Homo sapiens OX=9606 GN=CD34 PE=1 SV=2	Color2 [DarkGray]	1	4		19.6744	20.6141	19.6879	23.8736	24.4625	25.3651
	0.300507	0.512205	K.LTQGIC[+57.021]LEQN[+1622.582]K.T	HexNAc(4)Hex(5)	C[+57], N[+1623]	>sp|P28906|CD34_HUMAN Hematopoietic progenitor cell antigen CD34 OS=Homo sapiens OX=9606 GN=CD34 PE=1 SV=2	Color2 [DarkGray]	1	4		20.6336	19.9455	19.7605	20.6073	19.7817	18.4139
	1.32577	-3.21426	K.LTQGIC[+57.021]LEQN[+1694.603]K.T	HexNAc(3)Hex(4)Fuc(1)NeuAc(1)	C[+57], N[+1695]	>sp|P28906|CD34_HUMAN Hematopoietic progenitor cell antigen CD34 OS=Homo sapiens OX=9606 GN=CD34 PE=1 SV=2	Color2 [DarkGray]	1	4		19.0052	19.1674	18.6227	24.3403	20.6316	21.4663
	0.87081	-4.58413	K.LTQGIC[+57.021]LEQN[+1710.598]K.T	HexNAc(3)Hex(5)NeuAc(1)	C[+57], N[+1711]	>sp|P28906|CD34_HUMAN Hematopoietic progenitor cell antigen CD34 OS=Homo sapiens OX=9606 GN=CD34 PE=1 SV=2	Color2 [DarkGray]	1	4		19.3493	19.899	18.0184	26.838	25.182	18.999
+	2.58966	-6.02624	K.LTQGIC[+57.021]LEQN[+1727.613]K.T	HexNAc(3)Hex(6)Fuc(1)	C[+57], N[+1728]	>sp|P28906|CD34_HUMAN Hematopoietic progenitor cell antigen CD34 OS=Homo sapiens OX=9606 GN=CD34 PE=1 SV=2	Color2 [DarkGray]	1	4		19.3833	19.3868	17.8666	25.9841	25.2491	23.4822
+	2.27164	-7.81032	K.LTQGIC[+57.021]LEQN[+1768.640]K.T	HexNAc(4)Hex(5)Fuc(1)	C[+57], N[+1769]	>sp|P28906|CD34_HUMAN Hematopoietic progenitor cell antigen CD34 OS=Homo sapiens OX=9606 GN=CD34 PE=1 SV=2	Color2 [DarkGray]	1	4		23.899	19.7838	19.9558	29.1239	28.1748	29.7709
+	3.25735	-6.68553	K.LTQGIC[+57.021]LEQN[+1872.651]K.T	HexNAc(3)Hex(6)NeuAc(1)	C[+57], N[+1873]	>sp|P28906|CD34_HUMAN Hematopoietic progenitor cell antigen CD34 OS=Homo sapiens OX=9606 GN=CD34 PE=1 SV=2	Color2 [DarkGray]	1	4		20.2146	19.1465	18.5869	26.91	25.7104	25.3842
	0.731092	-2.95002	K.LTQGIC[+57.021]LEQN[+1913.677]K.T	HexNAc(4)Hex(5)NeuAc(1)	C[+57], N[+1914]	>sp|P28906|CD34_HUMAN Hematopoietic progenitor cell antigen CD34 OS=Homo sapiens OX=9606 GN=CD34 PE=1 SV=2	Color2 [DarkGray]	1	4		19.773	18.8887	19.8222	23.9025	24.6107	18.8208
	1.11594	-4.22346	K.LTQGIC[+57.021]LEQN[+2018.708]K.T	HexNAc(3)Hex(6)Fuc(1)NeuAc(1)	C[+57], N[+2019]	>sp|P28906|CD34_HUMAN Hematopoietic progenitor cell antigen CD34 OS=Homo sapiens OX=9606 GN=CD34 PE=1 SV=2	Color2 [DarkGray]	1	4		18.4543	19.0281	18.3909	24.6201	24.6121	19.3114
	1.86825	-5.94946	K.LTQGIC[+57.021]LEQN[+2059.735]K.T	HexNAc(4)Hex(5)Fuc(1)NeuAc(1)	C[+57], N[+2060]	>sp|P28906|CD34_HUMAN Hematopoietic progenitor cell antigen CD34 OS=Homo sapiens OX=9606 GN=CD34 PE=1 SV=2	Color2 [DarkGray]	1	4		19.267	23.7307	19.8521	26.8299	26.6315	27.2367
	1.38966	-3.00682	K.LTSC[+57.021]ATN[+1768.640]ASIC[+57.021]GDEAR.C	HexNAc(4)Hex(5)Fuc(1)	C[+57]*2, N[+1769]	>sp|Q07954|LRP1_HUMAN Prolow-density lipoprotein receptor-related protein 1 OS=Homo sapiens OX=9606 GN=LRP1 PE=1 SV=2	Color2 [DarkGray]	1	4		22.0309	21.467	19.0196	24.3489	24.1455	23.0436
	1.57975	-1.33522	K.LTSC[+57.021]ATN[+2059.735]ASIC[+57.021]GDEAR.C	HexNAc(4)Hex(5)Fuc(1)NeuAc(1)	C[+57]*2, N[+2060]	>sp|Q07954|LRP1_HUMAN Prolow-density lipoprotein receptor-related protein 1 OS=Homo sapiens OX=9606 GN=LRP1 PE=1 SV=2	Color2 [DarkGray]	1	4		24.3218	23.5906	24.5539	25.2411	25.2245	26.0063
	0.30068	-0.603209	K.LVALAVIDEKN[+1378.476]TSVEHTR.L	HexNAc(2)Hex(6)	N[+1378]	>sp|Q96JJ7|TMX3_HUMAN Protein disulfide-isomerase TMX3 OS=Homo sapiens OX=9606 GN=TMX3 PE=1 SV=2	Color2 [DarkGray]	1	4		24.3535	21.6333	23.3051	24.0609	23.4024	23.6383
+	3.13761	3.56769	K.LVALAVIDEKN[+1540.529]TSVEHTR.L	HexNAc(2)Hex(7)	N[+1541]	>sp|Q96JJ7|TMX3_HUMAN Protein disulfide-isomerase TMX3 OS=Homo sapiens OX=9606 GN=TMX3 PE=1 SV=2	Color2 [DarkGray]	1	4		26.0519	25.4577	25.3331	21.4281	22.3077	22.4038
+	2.9532	3.06666	K.LVALAVIDEKN[+1702.581]TSVEHTR.L	HexNAc(2)Hex(8)	N[+1703]	>sp|Q96JJ7|TMX3_HUMAN Protein disulfide-isomerase TMX3 OS=Homo sapiens OX=9606 GN=TMX3 PE=1 SV=2	Color2 [DarkGray]	1	4		26.4615	25.7554	26.5748	23.0371	22.8457	23.7089
	0.122368	-0.287721	K.LVALAVIDEKN[+1864.634]TSVEHTR.L	HexNAc(2)Hex(9)	N[+1865]	>sp|Q96JJ7|TMX3_HUMAN Protein disulfide-isomerase TMX3 OS=Homo sapiens OX=9606 GN=TMX3 PE=1 SV=2	Color2 [DarkGray]	1	4		18.3426	19.3302	21.12	20.2249	19.3356	20.0954
	0.633878	2.32298	K.LVALAVIDEKN[+2221.788]TSVEHTR.L	HexNAc(4)Hex(6)Fuc(1)NeuAc(1)	N[+2222]	>sp|Q96JJ7|TMX3_HUMAN Protein disulfide-isomerase TMX3 OS=Homo sapiens OX=9606 GN=TMX3 PE=1 SV=2	Color2 [DarkGray]	1	4		24.4421	21.0312	22.6558	18.527	19.6796	22.9536
+	2.09035	2.51069	K.LVALAVIDEKN[+2619.930]TSVEHTR.L	HexNAc(5)Hex(9)Fuc(1)	N[+2620]	>sp|Q96JJ7|TMX3_HUMAN Protein disulfide-isomerase TMX3 OS=Homo sapiens OX=9606 GN=TMX3 PE=1 SV=2	Color2 [DarkGray]	1	4		22.1087	21.0755	22.5883	18.9494	19.8265	19.4646
	1.41902	1.77144	K.LVLSSEKTVLTPATNHMGN[+2432.884]VTFTIPANR.E	HexNAc(6)Hex(3)Fuc(1)NeuAc(2)	N[+2433]	>sp|P01024|CO3_HUMAN Complement C3 OS=Homo sapiens OX=9606 GN=C3 PE=1 SV=2	Color2 [DarkGray]	1	4		21.3822	21.6544	21.1677	19.3361	20.7199	18.834
	0.817968	-0.742528	K.LYWISSGN[+1216.423]HTINR.C	HexNAc(2)Hex(5)	N[+1216]	>sp|Q07954|LRP1_HUMAN Prolow-density lipoprotein receptor-related protein 1 OS=Homo sapiens OX=9606 GN=LRP1 PE=1 SV=2	Color2 [DarkGray]	1	4		20.1979	20.2708	20.5609	20.3093	21.271	21.6768
	0.0117778	0.0509446	K.LYWISSGN[+1378.476]HTINR.C	HexNAc(2)Hex(6)	N[+1378]	>sp|Q07954|LRP1_HUMAN Prolow-density lipoprotein receptor-related protein 1 OS=Homo sapiens OX=9606 GN=LRP1 PE=1 SV=2	Color2 [DarkGray]	1	4		22.6943	19.7155	22.0323	22.6929	22.3704	19.226
	0.77817	0.966171	K.LYWISSGN[+1540.529]HTINR.C	HexNAc(2)Hex(7)	N[+1541]	>sp|Q07954|LRP1_HUMAN Prolow-density lipoprotein receptor-related protein 1 OS=Homo sapiens OX=9606 GN=LRP1 PE=1 SV=2	Color2 [DarkGray]	1	4		20.3282	19.2897	20.514	19.9315	18.6774	18.6244
	1.92362	2.5467	K.LYWISSGN[+1864.634]HTINR.C	HexNAc(2)Hex(9)	N[+1865]	>sp|Q07954|LRP1_HUMAN Prolow-density lipoprotein receptor-related protein 1 OS=Homo sapiens OX=9606 GN=LRP1 PE=1 SV=2	Color2 [DarkGray]	1	4		23.3219	23.5782	23.6218	21.4543	21.6123	19.8151
	0.0748429	0.294741	K.M[+15.995]DGASN[+2204.772]VTC[+57.021]INSR.W	HexNAc(4)Hex(5)NeuAc(2)	C[+57], M[+16], N[+2205]	>sp|P08603|CFAH_HUMAN Complement factor H OS=Homo sapiens OX=9606 GN=CFH PE=1 SV=4	Color2 [DarkGray]	1	4		22.9454	19.3707	18.6009	19.8801	20.6713	19.4813
	1.08672	2.5352	K.M[+15.995]LN[+2204.772]TSSLLEQLNEQFNWVSR.L	HexNAc(4)Hex(5)NeuAc(2)	M[+16], N[+2205]	>sp|P10909|CLUS_HUMAN Clusterin OS=Homo sapiens OX=9606 GN=CLU PE=1 SV=1	Color2 [DarkGray]	1	4		23.2213	19.7828	22.5488	19.9305	19.0744	18.9424
	0.885157	2.95798	K.M[+15.995]VSHHN[+1913.677]LTTGATLINEQWLLTTAK.N	HexNAc(4)Hex(5)NeuAc(1)	M[+16], N[+1914]	>sp|P00738|HPT_HUMAN Haptoglobin OS=Homo sapiens OX=9606 GN=HP PE=1 SV=1	Color2 [DarkGray]	1	4		25.0935	23.0913	23.7111	20.3312	23.7701	18.9207
	0.234383	-0.217667	K.M[+15.995]VSHHN[+2204.772]LTTGATLINEQWLLTTAK.N	HexNAc(4)Hex(5)NeuAc(2)	M[+16], N[+2205]	>sp|P00738|HPT_HUMAN Haptoglobin OS=Homo sapiens OX=9606 GN=HP PE=1 SV=1	Color2 [DarkGray]	1	4		24.5269	25.4341	24.7412	24.6979	25.1237	25.5336
	0.262084	-0.855302	K.MC[+57.021]LN[+1378.476]R.T	HexNAc(2)Hex(6)	C[+57], N[+1378]	>sp|Q13510|ASAH1_HUMAN Acid ceramidase OS=Homo sapiens OX=9606 GN=ASAH1 PE=1 SV=5	Color2 [DarkGray]	1	4		19.3426	20.5913	22.1476	22.8087	22.3034	19.5353
	0.871731	-2.75498	K.MC[+57.021]LN[+1540.529]R.T	HexNAc(2)Hex(7)	C[+57], N[+1541]	>sp|Q13510|ASAH1_HUMAN Acid ceramidase OS=Homo sapiens OX=9606 GN=ASAH1 PE=1 SV=5	Color2 [DarkGray]	1	4		24.4558	23.9627	24.6611	25.9105	30.0135	25.4206
+	2.16573	-5.28996	K.MDGASN[+1913.677]VTC[+57.021]INSR.W	HexNAc(4)Hex(5)NeuAc(1)	C[+57], N[+1914]	>sp|P08603|CFAH_HUMAN Complement factor H OS=Homo sapiens OX=9606 GN=CFH PE=1 SV=4	Color2 [DarkGray]	1	4		19.0659	20.7016	19.6282	26.911	24.1037	24.2508
	1.11588	1.30327	K.MDGASN[+2204.772]VTC[+57.021]INSR.W	HexNAc(4)Hex(5)NeuAc(2)	C[+57], N[+2205]	>sp|P08603|CFAH_HUMAN Complement factor H OS=Homo sapiens OX=9606 GN=CFH PE=1 SV=4	Color2 [DarkGray]	1	4		26.2917	27.6228	26.1962	24.8075	25.623	25.7703
	0.428549	-0.691462	K.MEMPSTPQQLQN[+1378.476]LTEDIR.E	HexNAc(2)Hex(6)	N[+1378]	>sp|P07942|LAMB1_HUMAN Laminin subunit beta-1 OS=Homo sapiens OX=9606 GN=LAMB1 PE=1 SV=2	Color2 [DarkGray]	1	4		18.5454	18.239	19.7066	19.8558	20.2173	18.4923
+	3.16237	-3.32897	K.MEMPSTPQQLQN[+2350.830]LTEDIR.E	HexNAc(4)Hex(5)Fuc(1)NeuAc(2)	N[+2351]	>sp|P07942|LAMB1_HUMAN Laminin subunit beta-1 OS=Homo sapiens OX=9606 GN=LAMB1 PE=1 SV=2	Color2 [DarkGray]	1	4		19.4187	19.9733	20.6131	23.3265	23.4418	23.2238
	1.29735	-0.891657	K.MLEAYN[+1540.529]LTEK.N	HexNAc(2)Hex(7)	N[+1541]	>sp|Q99715|COCA1_HUMAN Collagen alpha-1(XII) chain OS=Homo sapiens OX=9606 GN=COL12A1 PE=1 SV=2	Color2 [DarkGray]	1	4		18.9003	19.4922	19.1035	20.3189	20.3376	19.5145
	0.026609	0.0656605	K.MLEAYN[+1581.555]LTEK.N	HexNAc(3)Hex(6)	N[+1582]	>sp|Q99715|COCA1_HUMAN Collagen alpha-1(XII) chain OS=Homo sapiens OX=9606 GN=COL12A1 PE=1 SV=2	Color2 [DarkGray]	1	4		20.0523	20.4043	19.4987	20.9882	18.3904	20.3798
	1.26897	-3.83316	K.MLEAYN[+1702.581]LTEK.N	HexNAc(2)Hex(8)	N[+1703]	>sp|Q99715|COCA1_HUMAN Collagen alpha-1(XII) chain OS=Homo sapiens OX=9606 GN=COL12A1 PE=1 SV=2	Color2 [DarkGray]	1	4		20.4055	18.3214	18.9445	24.9553	23.5837	20.6319
	0.0164042	-0.0438709	K.MLEAYN[+1864.634]LTEK.N	HexNAc(2)Hex(9)	N[+1865]	>sp|Q99715|COCA1_HUMAN Collagen alpha-1(XII) chain OS=Homo sapiens OX=9606 GN=COL12A1 PE=1 SV=2	Color2 [DarkGray]	1	4		18.9029	19.809	19.0956	20.9734	18.226	18.7398
	1.49536	-3.10293	K.MLEAYN[+1872.651]LTEK.N	HexNAc(3)Hex(6)NeuAc(1)	N[+1873]	>sp|Q99715|COCA1_HUMAN Collagen alpha-1(XII) chain OS=Homo sapiens OX=9606 GN=COL12A1 PE=1 SV=2	Color2 [DarkGray]	1	4		17.8681	19.9977	19.3833	23.0621	22.7432	20.7525
	0.27751	0.177223	K.MLFVEPILEVSSLPTTN[+1702.581]STTNSATK.I	HexNAc(2)Hex(8)	N[+1703]	>sp|P05155|IC1_HUMAN Plasma protease C1 inhibitor OS=Homo sapiens OX=9606 GN=SERPING1 PE=1 SV=2	Color2 [DarkGray]	1	4		23.0563	22.215	22.4758	22.4328	22.4989	22.2838
	0.0703088	0.25164	K.MLFVEPILEVSSLPTTN[+1704.635]STTNSATK.I	HexNAc(6)Hex(3)	N[+1705]	>sp|P05155|IC1_HUMAN Plasma protease C1 inhibitor OS=Homo sapiens OX=9606 GN=SERPING1 PE=1 SV=2	Color2 [DarkGray]	1	4		19.5734	18.6173	22.4758	20.8423	19.8449	19.2245
	0.118435	-0.202276	K.MLN[+1768.640]TSSLLEQLNEQFNWVSR.L	HexNAc(4)Hex(5)Fuc(1)	N[+1769]	>sp|P10909|CLUS_HUMAN Clusterin OS=Homo sapiens OX=9606 GN=CLU PE=1 SV=1	Color2 [DarkGray]	1	4		19.3127	19.242	18.5084	18.4051	20.3107	18.9541
	0.54783	-1.7587	K.MLN[+1913.677]TSSLLEQLNEQFNWVSR.L	HexNAc(4)Hex(5)NeuAc(1)	N[+1914]	>sp|P10909|CLUS_HUMAN Clusterin OS=Homo sapiens OX=9606 GN=CLU PE=1 SV=1	Color2 [DarkGray]	1	4		20.1165	19.4005	19.0178	19.7847	24.0338	19.9924
	0.557216	-2.61348	K.MLN[+2059.735]TSSLLEQLNEQFNWVSR.L	HexNAc(4)Hex(5)Fuc(1)NeuAc(1)	N[+2060]	>sp|P10909|CLUS_HUMAN Clusterin OS=Homo sapiens OX=9606 GN=CLU PE=1 SV=1	Color2 [DarkGray]	1	4		19.3265	19.4108	21.3334	18.95	25.7002	23.261
	0.284115	0.945996	K.MLN[+2204.772]TSSLLEQLNEQFNWVSR.L	HexNAc(4)Hex(5)NeuAc(2)	N[+2205]	>sp|P10909|CLUS_HUMAN Clusterin OS=Homo sapiens OX=9606 GN=CLU PE=1 SV=1	Color2 [DarkGray]	1	4		22.4507	18.5353	19.6369	19.462	20.3012	18.0217
	0.622923	-0.655872	K.MLN[+2221.788]TSSLLEQLNEQFNWVSR.L	HexNAc(4)Hex(6)Fuc(1)NeuAc(1)	N[+2222]	>sp|P10909|CLUS_HUMAN Clusterin OS=Homo sapiens OX=9606 GN=CLU PE=1 SV=1	Color2 [DarkGray]	1	4		19.2924	20.2857	19.5242	20.4599	20.9332	19.6768
	0.896485	-1.73466	K.MLN[+2278.809]TSSLLEQLNEQFNWVSR.L	HexNAc(5)Hex(6)NeuAc(1)	N[+2279]	>sp|P10909|CLUS_HUMAN Clusterin OS=Homo sapiens OX=9606 GN=CLU PE=1 SV=1	Color2 [DarkGray]	1	4		19.7361	18.9123	20.3188	20.4871	22.9959	20.6882
	0.638438	-1.85671	K.MLN[+2350.830]TSSLLEQLNEQFNWVSR.L	HexNAc(4)Hex(5)Fuc(1)NeuAc(2)	N[+2351]	>sp|P10909|CLUS_HUMAN Clusterin OS=Homo sapiens OX=9606 GN=CLU PE=1 SV=1	Color2 [DarkGray]	1	4		18.4846	19.006	20.0731	19.5791	23.4794	20.0754
	0.0962494	-0.327788	K.MLN[+2424.867]TSSLLEQLNEQFNWVSR.L	HexNAc(5)Hex(6)Fuc(1)NeuAc(1)	N[+2425]	>sp|P10909|CLUS_HUMAN Clusterin OS=Homo sapiens OX=9606 GN=CLU PE=1 SV=1	Color2 [DarkGray]	1	4		21.031	19.6683	20.2783	20.4318	22.7522	18.7769
	0.725	-3.60624	K.MLN[+2569.905]TSSLLEQLNEQFNWVSR.L	HexNAc(5)Hex(6)NeuAc(2)	N[+2570]	>sp|P10909|CLUS_HUMAN Clusterin OS=Homo sapiens OX=9606 GN=CLU PE=1 SV=1	Color2 [DarkGray]	1	4		19.513	18.33	19.6813	18.4429	25.8948	24.0053
	0.0191998	-0.0858612	K.MLN[+2586.920]TSSLLEQLNEQFNWVSR.L	HexNAc(5)Hex(7)Fuc(1)NeuAc(1)	N[+2587]	>sp|P10909|CLUS_HUMAN Clusterin OS=Homo sapiens OX=9606 GN=CLU PE=1 SV=1	Color2 [DarkGray]	1	4		20.594	19.9727	19.2585	18.6239	22.9016	18.5573
	0.781611	-0.968929	K.MLN[+2715.963]TSSLLEQLNEQFNWVSR.L	HexNAc(5)Hex(6)Fuc(1)NeuAc(2)	N[+2716]	>sp|P10909|CLUS_HUMAN Clusterin OS=Homo sapiens OX=9606 GN=CLU PE=1 SV=1	Color2 [DarkGray]	1	4		19.3711	19.7126	18.8152	19.7481	21.2852	19.7724
	0.402123	0.785165	K.MN[+1378.476]FTGGDTC[+57.021]HK.V	HexNAc(2)Hex(6)	C[+57], N[+1378]	>sp|P11717|MPRI_HUMAN Cation-independent mannose-6-phosphate receptor OS=Homo sapiens OX=9606 GN=IGF2R PE=1 SV=3	Color2 [DarkGray]	1	4		19.4153	19.2774	21.7841	19.5871	19.0882	19.4461
	0.618718	0.275456	K.MN[+1540.529]FTGGDTC[+57.021]HK.V	HexNAc(2)Hex(7)	C[+57], N[+1541]	>sp|P11717|MPRI_HUMAN Cation-independent mannose-6-phosphate receptor OS=Homo sapiens OX=9606 GN=IGF2R PE=1 SV=3	Color2 [DarkGray]	1	4		22.7098	22.9482	23.2364	22.7078	22.4559	22.9043
	0.392183	-1.91224	K.MN[+1702.581]FTGGDTC[+57.021]HK.V	HexNAc(2)Hex(8)	C[+57], N[+1703]	>sp|P11717|MPRI_HUMAN Cation-independent mannose-6-phosphate receptor OS=Homo sapiens OX=9606 GN=IGF2R PE=1 SV=3	Color2 [DarkGray]	1	4		24.5023	18.4798	24.7751	24.6377	24.2685	24.5876
	0.373516	-0.428311	K.MN[+1864.634]FTGGDTC[+57.021]HK.V	HexNAc(2)Hex(9)	C[+57], N[+1865]	>sp|P11717|MPRI_HUMAN Cation-independent mannose-6-phosphate receptor OS=Homo sapiens OX=9606 GN=IGF2R PE=1 SV=3	Color2 [DarkGray]	1	4		23.6478	24.0483	23.8342	24.5599	23.3593	24.896
	0.458311	0.519156	K.MSVC[+57.021]TDN[+1540.529]VTDLR.I	HexNAc(2)Hex(7)	C[+57], N[+1541]	>sp|Q6UXG2|ELAP1_HUMAN Endosome/lysosome-associated apoptosis and autophagy regulator 1 OS=Homo sapiens OX=9606 GN=ELAPOR1 PE=1 SV=2	Color2 [DarkGray]	1	4		20.2877	21.6068	21.2548	20.0421	21.0421	20.5076
	0.789925	2.40937	K.MSVC[+57.021]TDN[+1702.581]VTDLR.I	HexNAc(2)Hex(8)	C[+57], N[+1703]	>sp|Q6UXG2|ELAP1_HUMAN Endosome/lysosome-associated apoptosis and autophagy regulator 1 OS=Homo sapiens OX=9606 GN=ELAPOR1 PE=1 SV=2	Color2 [DarkGray]	1	4		19.3855	22.0133	24.0508	20.1719	19.2205	18.829
	0.28142	1.39324	K.MSVC[+57.021]TDN[+1864.634]VTDLR.I	HexNAc(2)Hex(9)	C[+57], N[+1865]	>sp|Q6UXG2|ELAP1_HUMAN Endosome/lysosome-associated apoptosis and autophagy regulator 1 OS=Homo sapiens OX=9606 GN=ELAPOR1 PE=1 SV=2	Color2 [DarkGray]	1	4		21.6281	16.9017	23.5676	18.8758	19.3601	19.6818
	0.274997	1.64229	K.MVSHHN[+1622.582]LTTGATLINEQWLLTTAK.N	HexNAc(4)Hex(5)	N[+1623]	>sp|P00738|HPT_HUMAN Haptoglobin OS=Homo sapiens OX=9606 GN=HP PE=1 SV=1	Color2 [DarkGray]	1	4		19.8798	25.0444	24.2159	20.1935	24.9156	19.1042
	1.21197	4.80828	K.MVSHHN[+1702.581]LTTGATLINEQWLLTTAK.N	HexNAc(2)Hex(8)	N[+1703]	>sp|P00738|HPT_HUMAN Haptoglobin OS=Homo sapiens OX=9606 GN=HP PE=1 SV=1	Color2 [DarkGray]	1	4		21.2761	26.595	26.5732	21.144	19.6912	19.1842
	1.22476	-1.92487	K.MVSHHN[+1866.688]LTTGATLINEQWLLTTAK.N	HexNAc(6)Hex(4)	N[+1867]	>sp|P00738|HPT_HUMAN Haptoglobin OS=Homo sapiens OX=9606 GN=HP PE=1 SV=1	Color2 [DarkGray]	1	4		18.3602	19.0065	19.2076	20.7813	19.5842	21.9835
	1.45901	-0.699823	K.MVSHHN[+1913.677]LTTGATLINEQWLLTTAK.N	HexNAc(4)Hex(5)NeuAc(1)	N[+1914]	>sp|P00738|HPT_HUMAN Haptoglobin OS=Homo sapiens OX=9606 GN=HP PE=1 SV=1	Color2 [DarkGray]	1	4		28.536	28.7774	29.1825	29.3075	29.7095	29.5784
	0.2785	0.892593	K.MVSHHN[+2059.735]LTTGATLINEQWLLTTAK.N	HexNAc(4)Hex(5)Fuc(1)NeuAc(1)	N[+2060]	>sp|P00738|HPT_HUMAN Haptoglobin OS=Homo sapiens OX=9606 GN=HP PE=1 SV=1	Color2 [DarkGray]	1	4		18.5969	19.4209	22.6252	18.731	19.1804	20.0539
	2.83833	1.76634	K.MVSHHN[+2204.772]LTTGATLINEQWLLTTAK.N	HexNAc(4)Hex(5)NeuAc(2)	N[+2205]	>sp|P00738|HPT_HUMAN Haptoglobin OS=Homo sapiens OX=9606 GN=HP PE=1 SV=1	Color2 [DarkGray]	1	4		30.6888	31.3627	31.0208	29.0854	29.2112	29.4768
	0.0193126	0.122566	K.MVSHHN[+2350.830]LTTGATLINEQWLLTTAK.N	HexNAc(4)Hex(5)Fuc(1)NeuAc(2)	N[+2351]	>sp|P00738|HPT_HUMAN Haptoglobin OS=Homo sapiens OX=9606 GN=HP PE=1 SV=1	Color2 [DarkGray]	1	4		21.1347	19.0249	22.499	24.4149	18.3731	19.5029
+	2.68274	3.10024	K.MVSHHN[+2569.905]LTTGATLINEQWLLTTAK.N	HexNAc(5)Hex(6)NeuAc(2)	N[+2570]	>sp|P00738|HPT_HUMAN Haptoglobin OS=Homo sapiens OX=9606 GN=HP PE=1 SV=1	Color2 [DarkGray]	1	4		26.6737	27.7202	27.442	23.9696	23.7877	24.7779
	0.573878	-1.80039	K.MVSHHN[+2861.000]LTTGATLINEQWLLTTAK.N	HexNAc(5)Hex(6)NeuAc(3)	N[+2861]	>sp|P00738|HPT_HUMAN Haptoglobin OS=Homo sapiens OX=9606 GN=HP PE=1 SV=1	Color2 [DarkGray]	1	4		23.2081	26.7249	25.7498	28.4243	25.2858	27.374
	0.597348	-1.70323	K.MVSHHN[+2864.036]LTTGATLINEQWLLTTAK.N	HexNAc(7)Hex(8)Fuc(1)	N[+2864]	>sp|P00738|HPT_HUMAN Haptoglobin OS=Homo sapiens OX=9606 GN=HP PE=1 SV=1	Color2 [DarkGray]	1	4		19.4768	19.8119	18.1994	20.2805	19.1837	23.1337
	0.0426921	0.219639	K.MVSHHN[+3007.058]LTTGATLINEQWLLTTAK.N	HexNAc(5)Hex(6)Fuc(1)NeuAc(3)	N[+3007]	>sp|P00738|HPT_HUMAN Haptoglobin OS=Homo sapiens OX=9606 GN=HP PE=1 SV=1	Color2 [DarkGray]	1	4		19.4036	23.5374	19.8489	19.1238	20.0237	22.9835
	0.046778	0.159557	K.MYSEGSDIVPQSN[+1378.476]ETALHYFK.K	HexNAc(2)Hex(6)	N[+1378]	>sp|Q9UBV2|SE1L1_HUMAN Protein sel-1 homolog 1 OS=Homo sapiens OX=9606 GN=SEL1L PE=1 SV=3	Color2 [DarkGray]	1	4		19.7168	21.2347	22.0028	22.1621	18.9758	21.3378
	0.328553	1.36388	K.MYSEGSDIVPQSN[+1540.529]ETALHYFK.K	HexNAc(2)Hex(7)	N[+1541]	>sp|Q9UBV2|SE1L1_HUMAN Protein sel-1 homolog 1 OS=Homo sapiens OX=9606 GN=SEL1L PE=1 SV=3	Color2 [DarkGray]	1	4		25.9258	20.0194	22.716	21.6309	21.4652	21.4735
	0.713409	1.70893	K.MYSEGSDIVPQSN[+1694.603]ETALHYFK.K	HexNAc(3)Hex(4)Fuc(1)NeuAc(1)	N[+1695]	>sp|Q9UBV2|SE1L1_HUMAN Protein sel-1 homolog 1 OS=Homo sapiens OX=9606 GN=SEL1L PE=1 SV=3	Color2 [DarkGray]	1	4		22.4551	19.7337	22.6475	19.1836	19.5215	21.0045
+	2.73566	3.85512	K.MYSEGSDIVPQSN[+1702.581]ETALHYFK.K	HexNAc(2)Hex(8)	N[+1703]	>sp|Q9UBV2|SE1L1_HUMAN Protein sel-1 homolog 1 OS=Homo sapiens OX=9606 GN=SEL1L PE=1 SV=3	Color2 [DarkGray]	1	4		23.7952	24.8361	25.5581	21.0783	20.8823	20.6635
+	2.96596	3.13605	K.MYSEGSDIVPQSN[+1864.634]ETALHYFK.K	HexNAc(2)Hex(9)	N[+1865]	>sp|Q9UBV2|SE1L1_HUMAN Protein sel-1 homolog 1 OS=Homo sapiens OX=9606 GN=SEL1L PE=1 SV=3	Color2 [DarkGray]	1	4		22.5382	23.0146	22.8049	18.9619	20.0451	19.9426
	0.617428	2.0235	K.N[+1054.370]ATLAEQAK.L	HexNAc(2)Hex(4)	N[+1054]	>sp|Q9Y4L1|HYOU1_HUMAN Hypoxia up-regulated protein 1 OS=Homo sapiens OX=9606 GN=HYOU1 PE=1 SV=1	Color2 [DarkGray]	1	4		19.3304	23.3834	20.0186	18.7997	17.5917	20.2705
	0.68771	3.06197	K.N[+1216.423]ATLAEQAK.L	HexNAc(2)Hex(5)	N[+1216]	>sp|Q9Y4L1|HYOU1_HUMAN Hypoxia up-regulated protein 1 OS=Homo sapiens OX=9606 GN=HYOU1 PE=1 SV=1	Color2 [DarkGray]	1	4		24.9609	18.906	24.614	18.7626	20.3035	20.2288
	0.600711	1.18233	K.N[+1216.423]C[+57.021]SAAC[+57.021]PGLQLSNNPVK.G	HexNAc(2)Hex(5)	C[+57]*2, N[+1216]	>sp|P05107|ITB2_HUMAN Integrin beta-2 OS=Homo sapiens OX=9606 GN=ITGB2 PE=1 SV=2	Color2 [DarkGray]	1	4		21.8888	21.0731	20.6475	21.4809	18.7142	19.8673
	0.280734	-1.62299	K.N[+1216.423]NSIPDK.Q	HexNAc(2)Hex(5)	N[+1216]	>sp|Q08431|MFGM_HUMAN Lactadherin OS=Homo sapiens OX=9606 GN=MFGE8 PE=1 SV=3	Color2 [DarkGray]	1	4		17.8217	21.3713	23.8674	24.2116	19.5853	24.1325
	1.0402	1.80643	K.N[+1216.423]STFGSVEVHNLQPEK.V	HexNAc(2)Hex(5)	N[+1216]	>sp|P28907|CD38_HUMAN ADP-ribosyl cyclase/cyclic ADP-ribose hydrolase 1 OS=Homo sapiens OX=9606 GN=CD38 PE=1 SV=2	Color2 [DarkGray]	1	4		21.5258	19.3269	21.6609	18.6567	18.8019	19.6358
	0.451196	-2.04915	K.N[+1216.423]STKQEILAALEK.G	HexNAc(2)Hex(5)	N[+1216]	>sp|P07602|SAP_HUMAN Prosaposin OS=Homo sapiens OX=9606 GN=PSAP PE=1 SV=2	Color2 [DarkGray]	1	4		21.9947	18.5755	19.4244	23.7622	23.6592	18.7206
	1.72819	-2.66989	K.N[+1216.423]VTAQIC[+57.021]IDK.K	HexNAc(2)Hex(5)	C[+57], N[+1216]	>sp|P12109|CO6A1_HUMAN Collagen alpha-1(VI) chain OS=Homo sapiens OX=9606 GN=COL6A1 PE=1 SV=3	Color2 [DarkGray]	1	4		19.6352	18.6106	20.7579	22.3711	22.8756	21.7668
	0.901101	-3.52765	K.N[+1216.423]VTAQIC[+57.021]IDKK.C	HexNAc(2)Hex(5)	C[+57], N[+1216]	>sp|P12109|CO6A1_HUMAN Collagen alpha-1(VI) chain OS=Homo sapiens OX=9606 GN=COL6A1 PE=1 SV=3	Color2 [DarkGray]	1	4		23.5798	18.9983	23.5114	23.8645	27.3847	25.4232
	1.90927	-5.10299	K.N[+1257.449]VTAQIC[+57.021]IDKK.C	HexNAc(3)Hex(4)	C[+57], N[+1257]	>sp|P12109|CO6A1_HUMAN Collagen alpha-1(VI) chain OS=Homo sapiens OX=9606 GN=COL6A1 PE=1 SV=3	Color2 [DarkGray]	1	4		18.9143	18.3125	19.9268	24.0161	22.3573	26.0892
+	2.20328	3.74314	K.N[+1378.476]ATLAEQAK.L	HexNAc(2)Hex(6)	N[+1378]	>sp|Q9Y4L1|HYOU1_HUMAN Hypoxia up-regulated protein 1 OS=Homo sapiens OX=9606 GN=HYOU1 PE=1 SV=1	Color2 [DarkGray]	1	4		26.5013	28.2363	27.8131	24.4661	22.8424	24.0127
+	2.73811	4.7472	K.N[+1378.476]C[+57.021]SAAC[+57.021]PGLQLSNNPVK.G	HexNAc(2)Hex(6)	C[+57]*2, N[+1378]	>sp|P05107|ITB2_HUMAN Integrin beta-2 OS=Homo sapiens OX=9606 GN=ITGB2 PE=1 SV=2	Color2 [DarkGray]	1	4		23.9626	24.2685	23.6079	19.6779	17.9742	19.9453
	1.46556	0.675685	K.N[+1378.476]C[+57.021]TSISGDLHILPVAFR.G	HexNAc(2)Hex(6)	C[+57], N[+1378]	>sp|P00533|EGFR_HUMAN Epidermal growth factor receptor OS=Homo sapiens OX=9606 GN=EGFR PE=1 SV=2	Color2 [DarkGray]	1	4		20.0709	19.9934	20.1623	19.0477	19.7686	19.3833
	1.13144	-1.98099	K.N[+1378.476]FSEAASDFHK.R	HexNAc(2)Hex(6)	N[+1378]	>sp|Q9Y3Q0|NALD2_HUMAN N-acetylated-alpha-linked acidic dipeptidase 2 OS=Homo sapiens OX=9606 GN=NAALAD2 PE=1 SV=1	Color2 [DarkGray]	1	4		20.1683	18.9116	20.2436	21.3644	23.117	20.7851
	0.110355	-0.217725	K.N[+1378.476]M[+15.995]SFVNDLTVTQDGR.K	HexNAc(2)Hex(6)	M[+16], N[+1378]	>sp|Q9HDC9|APMAP_HUMAN Adipocyte plasma membrane-associated protein OS=Homo sapiens OX=9606 GN=APMAP PE=1 SV=2	Color2 [DarkGray]	1	4		20.7975	18.9576	19.0034	19.0541	20.2599	20.0977
	0.257554	0.476224	K.N[+1378.476]MSFVNDLTVTQDGR.K	HexNAc(2)Hex(6)	N[+1378]	>sp|Q9HDC9|APMAP_HUMAN Adipocyte plasma membrane-associated protein OS=Homo sapiens OX=9606 GN=APMAP PE=1 SV=2	Color2 [DarkGray]	1	4		25.4418	24.0721	24.504	24.8794	24.7398	22.97
	0.310549	0.753353	K.N[+1378.476]MSFVNDLTVTQDGRK.I	HexNAc(2)Hex(6)	N[+1378]	>sp|Q9HDC9|APMAP_HUMAN Adipocyte plasma membrane-associated protein OS=Homo sapiens OX=9606 GN=APMAP PE=1 SV=2	Color2 [DarkGray]	1	4		22.3136	22.9385	24.429	20.9416	23.2451	23.2343
	0.257278	0.998188	K.N[+1378.476]STKQEILAALEK.G	HexNAc(2)Hex(6)	N[+1378]	>sp|P07602|SAP_HUMAN Prosaposin OS=Homo sapiens OX=9606 GN=PSAP PE=1 SV=2	Color2 [DarkGray]	1	4		24.4613	23.0285	22.4063	23.6059	23.8287	19.467
+	2.74709	3.62318	K.N[+1378.476]VSC[+57.021]LWC[+57.021]NTNK.A	HexNAc(2)Hex(6)	C[+57]*2, N[+1378]	>sp|P53801|PTTG_HUMAN Pituitary tumor-transforming gene 1 protein-interacting protein OS=Homo sapiens OX=9606 GN=PTTG1IP PE=1 SV=1	Color2 [DarkGray]	1	4		23.1445	21.7828	21.7349	18.4405	18.9263	18.4259
	0.553847	-1.63914	K.N[+1378.476]VTAQIC[+57.021]IDK.K	HexNAc(2)Hex(6)	C[+57], N[+1378]	>sp|P12109|CO6A1_HUMAN Collagen alpha-1(VI) chain OS=Homo sapiens OX=9606 GN=COL6A1 PE=1 SV=3	Color2 [DarkGray]	1	4		18.9687	19.8167	19.6362	23.2084	21.3553	18.7754
	1.10537	-3.07346	K.N[+1378.476]VTAQIC[+57.021]IDKK.C	HexNAc(2)Hex(6)	C[+57], N[+1378]	>sp|P12109|CO6A1_HUMAN Collagen alpha-1(VI) chain OS=Homo sapiens OX=9606 GN=COL6A1 PE=1 SV=3	Color2 [DarkGray]	1	4		24.6521	22.1656	26.3466	26.5026	27.814	28.0681
+	2.39955	-3.85706	K.N[+1378.476]YTADYDK.A	HexNAc(2)Hex(6)	N[+1378]	>sp|O94905|ERLN2_HUMAN Erlin-2 OS=Homo sapiens OX=9606 GN=ERLIN2 PE=1 SV=1	Color2 [DarkGray]	1	4		19.5788	20.0439	21.6894	24.383	24.102	24.3982
	1.17613	2.75635	K.N[+1403.507]QSVPLSC[+57.021]C[+57.021]R.E	HexNAc(3)Hex(4)Fuc(1)	C[+57]*2, N[+1404]	>sp|O60637|TSN3_HUMAN Tetraspanin-3 OS=Homo sapiens OX=9606 GN=TSPAN3 PE=2 SV=1	Color2 [DarkGray]	1	4		19.6991	22.9384	22.9249	19.4721	19.1434	18.6779
+	3.71526	-8.38359	K.N[+1419.502]VTAQIC[+57.021]IDK.K	HexNAc(3)Hex(5)	C[+57], N[+1420]	>sp|P12109|CO6A1_HUMAN Collagen alpha-1(VI) chain OS=Homo sapiens OX=9606 GN=COL6A1 PE=1 SV=3	Color2 [DarkGray]	1	4		18.2916	19.3126	18.6372	26.1031	28.0395	27.2496
+	3.0378	-6.85786	K.N[+1419.502]VTAQIC[+57.021]IDKK.C	HexNAc(3)Hex(5)	C[+57], N[+1420]	>sp|P12109|CO6A1_HUMAN Collagen alpha-1(VI) chain OS=Homo sapiens OX=9606 GN=COL6A1 PE=1 SV=3	Color2 [DarkGray]	1	4		17.9362	18.432	19.2499	24.1675	26.5063	25.5178
	1.93517	4.94996	K.N[+1540.529]ATLAEQAK.L	HexNAc(2)Hex(7)	N[+1541]	>sp|Q9Y4L1|HYOU1_HUMAN Hypoxia up-regulated protein 1 OS=Homo sapiens OX=9606 GN=HYOU1 PE=1 SV=1	Color2 [DarkGray]	1	4		26.2897	26.6905	26.8709	19.7431	21.6716	23.5865
	1.13048	-3.27451	K.N[+1540.529]ATSYPPMC[+57.021]TQDPK.A	HexNAc(2)Hex(7)	C[+57], N[+1541]	>sp|P23141|EST1_HUMAN Liver carboxylesterase 1 OS=Homo sapiens OX=9606 GN=CES1 PE=1 SV=2	Color2 [DarkGray]	1	4		22.1114	22.9107	18.6666	24.8512	24.9553	23.7058
	0.632856	0.935844	K.N[+1540.529]C[+57.021]SAAC[+57.021]PGLQLSNNPVK.G	HexNAc(2)Hex(7)	C[+57]*2, N[+1541]	>sp|P05107|ITB2_HUMAN Integrin beta-2 OS=Homo sapiens OX=9606 GN=ITGB2 PE=1 SV=2	Color2 [DarkGray]	1	4		24.5688	24.8696	24.7639	22.5022	24.2251	24.6675
+	2.26362	5.42451	K.N[+1540.529]C[+57.021]TSISGDLHILPVAFR.G	HexNAc(2)Hex(7)	C[+57], N[+1541]	>sp|P00533|EGFR_HUMAN Epidermal growth factor receptor OS=Homo sapiens OX=9606 GN=EGFR PE=1 SV=2	Color2 [DarkGray]	1	4		26.3997	24.8859	24.9137	21.0918	20.5438	18.2901
	0.209674	0.727524	K.N[+1540.529]ISSHTNIVFSNGELDPWSGGGVTK.D	HexNAc(2)Hex(7)	N[+1541]	>sp|P42785|PCP_HUMAN Lysosomal Pro-X carboxypeptidase OS=Homo sapiens OX=9606 GN=PRCP PE=1 SV=1	Color2 [DarkGray]	1	4		18.9537	20.3572	23.2413	19.2166	20.7342	20.4188
	0.00166002	-0.00441424	K.N[+1540.529]M[+15.995]SFVNDLTVTQDGR.K	HexNAc(2)Hex(7)	M[+16], N[+1541]	>sp|Q9HDC9|APMAP_HUMAN Adipocyte plasma membrane-associated protein OS=Homo sapiens OX=9606 GN=APMAP PE=1 SV=2	Color2 [DarkGray]	1	4		21.7022	19.4767	19.5294	21.1441	19.9733	19.6041
	0.90613	2.97795	K.N[+1540.529]MSFVNDLTVTQDGR.K	HexNAc(2)Hex(7)	N[+1541]	>sp|Q9HDC9|APMAP_HUMAN Adipocyte plasma membrane-associated protein OS=Homo sapiens OX=9606 GN=APMAP PE=1 SV=2	Color2 [DarkGray]	1	4		26.2263	26.0644	26.9655	25.4807	24.3454	20.4961
	0.980418	-1.57673	K.N[+1540.529]MSFVNDLTVTQDGRK.I	HexNAc(2)Hex(7)	N[+1541]	>sp|Q9HDC9|APMAP_HUMAN Adipocyte plasma membrane-associated protein OS=Homo sapiens OX=9606 GN=APMAP PE=1 SV=2	Color2 [DarkGray]	1	4		18.0913	18.4706	19.4703	21.4031	20.1346	19.2248
	1.15087	-1.87036	K.N[+1540.529]NTIYVDNFDK.L	HexNAc(2)Hex(7)	N[+1541]	>sp|A8TX70|CO6A5_HUMAN Collagen alpha-5(VI) chain OS=Homo sapiens OX=9606 GN=COL6A5 PE=1 SV=1	Color2 [DarkGray]	1	4		18.6873	19.3031	18.6228	22.1233	19.6273	20.4737
	0.0891939	-0.253184	K.N[+1540.529]STKQEILAALEK.G	HexNAc(2)Hex(7)	N[+1541]	>sp|P07602|SAP_HUMAN Prosaposin OS=Homo sapiens OX=9606 GN=PSAP PE=1 SV=2	Color2 [DarkGray]	1	4		24.2586	24.7187	21.5429	24.1261	23.6857	23.4679
	0.908599	3.24098	K.N[+1540.529]VSC[+57.021]LWC[+57.021]NTNK.A	HexNAc(2)Hex(7)	C[+57]*2, N[+1541]	>sp|P53801|PTTG_HUMAN Pituitary tumor-transforming gene 1 protein-interacting protein OS=Homo sapiens OX=9606 GN=PTTG1IP PE=1 SV=1	Color2 [DarkGray]	1	4		25.4582	25.2209	26.2511	23.5004	24.5217	19.1851
	1.25472	-2.07016	K.N[+1540.529]VTAQIC[+57.021]IDK.K	HexNAc(2)Hex(7)	C[+57], N[+1541]	>sp|P12109|CO6A1_HUMAN Collagen alpha-1(VI) chain OS=Homo sapiens OX=9606 GN=COL6A1 PE=1 SV=3	Color2 [DarkGray]	1	4		19.3624	19.221	19.3724	20.0994	22.7719	21.295
	0.630641	-3.29834	K.N[+1540.529]VTAQIC[+57.021]IDKK.C	HexNAc(2)Hex(7)	C[+57], N[+1541]	>sp|P12109|CO6A1_HUMAN Collagen alpha-1(VI) chain OS=Homo sapiens OX=9606 GN=COL6A1 PE=1 SV=3	Color2 [DarkGray]	1	4		19.1332	18.8039	20.2962	24.0786	25.8496	18.2001
	0.723489	-0.670044	K.N[+1548.545]C[+57.021]SAAC[+57.021]PGLQLSNNPVK.G	HexNAc(3)Hex(4)NeuAc(1)	C[+57]*2, N[+1549]	>sp|P05107|ITB2_HUMAN Integrin beta-2 OS=Homo sapiens OX=9606 GN=ITGB2 PE=1 SV=2	Color2 [DarkGray]	1	4		19.8627	18.706	19.2566	20.3006	19.4368	20.098
	0.315463	-0.47822	K.N[+1548.545]VTAQIC[+57.021]IDK.K	HexNAc(3)Hex(4)NeuAc(1)	C[+57], N[+1549]	>sp|P12109|CO6A1_HUMAN Collagen alpha-1(VI) chain OS=Homo sapiens OX=9606 GN=COL6A1 PE=1 SV=3	Color2 [DarkGray]	1	4		19.3968	19.312	20.0785	18.9647	20.3954	20.8618
+	2.40448	-6.9512	K.N[+1548.545]VTAQIC[+57.021]IDKK.C	HexNAc(3)Hex(4)NeuAc(1)	C[+57], N[+1549]	>sp|P12109|CO6A1_HUMAN Collagen alpha-1(VI) chain OS=Homo sapiens OX=9606 GN=COL6A1 PE=1 SV=3	Color2 [DarkGray]	1	4		18.8761	19.6127	19.0476	23.8944	26.8451	27.6505
+	3.31841	4.3421	K.N[+1565.560]QSVPLSC[+57.021]C[+57.021]R.E	HexNAc(3)Hex(5)Fuc(1)	C[+57]*2, N[+1566]	>sp|O60637|TSN3_HUMAN Tetraspanin-3 OS=Homo sapiens OX=9606 GN=TSPAN3 PE=2 SV=1	Color2 [DarkGray]	1	4		23.3388	23.5862	23.3564	19.9026	18.6409	18.7116
	1.62177	2.2355	K.N[+1581.555]C[+57.021]SAAC[+57.021]PGLQLSNNPVK.G	HexNAc(3)Hex(6)	C[+57]*2, N[+1582]	>sp|P05107|ITB2_HUMAN Integrin beta-2 OS=Homo sapiens OX=9606 GN=ITGB2 PE=1 SV=2	Color2 [DarkGray]	1	4		24.9289	24.7228	24.6677	22.0982	21.7431	23.7716
+	2.09847	-4.22674	K.N[+1581.555]VTAQIC[+57.021]IDK.K	HexNAc(3)Hex(6)	C[+57], N[+1582]	>sp|P12109|CO6A1_HUMAN Collagen alpha-1(VI) chain OS=Homo sapiens OX=9606 GN=COL6A1 PE=1 SV=3	Color2 [DarkGray]	1	4		18.1616	19.3133	18.2882	23.6128	23.5744	21.256
	1.65601	-5.56895	K.N[+1581.555]VTAQIC[+57.021]IDKK.C	HexNAc(3)Hex(6)	C[+57], N[+1582]	>sp|P12109|CO6A1_HUMAN Collagen alpha-1(VI) chain OS=Homo sapiens OX=9606 GN=COL6A1 PE=1 SV=3	Color2 [DarkGray]	1	4		19.5883	21.5613	18.8523	23.0172	27.2892	26.4024
	0.647419	-2.12645	K.N[+1606.587]ISQDLEK.Q	HexNAc(4)Hex(4)Fuc(1)	N[+1607]	>sp|P11047|LAMC1_HUMAN Laminin subunit gamma-1 OS=Homo sapiens OX=9606 GN=LAMC1 PE=1 SV=3	Color2 [DarkGray]	1	4		20.0034	20.1033	20.5511	25.24	20.4082	21.3889
	1.05556	-3.43923	K.N[+1622.582]ISQDLEK.Q	HexNAc(4)Hex(5)	N[+1623]	>sp|P11047|LAMC1_HUMAN Laminin subunit gamma-1 OS=Homo sapiens OX=9606 GN=LAMC1 PE=1 SV=3	Color2 [DarkGray]	1	4		18.348	19.3796	19.5815	25.2406	20.1286	22.2577
	0.809518	-2.62322	K.N[+1622.582]VTAQIC[+57.021]IDK.K	HexNAc(4)Hex(5)	C[+57], N[+1623]	>sp|P12109|CO6A1_HUMAN Collagen alpha-1(VI) chain OS=Homo sapiens OX=9606 GN=COL6A1 PE=1 SV=3	Color2 [DarkGray]	1	4		19.8931	20.1259	18.5021	24.5375	22.2014	19.6518
	0.887953	-3.85806	K.N[+1622.582]VTAQIC[+57.021]IDKK.C	HexNAc(4)Hex(5)	C[+57], N[+1623]	>sp|P12109|CO6A1_HUMAN Collagen alpha-1(VI) chain OS=Homo sapiens OX=9606 GN=COL6A1 PE=1 SV=3	Color2 [DarkGray]	1	4		19.6928	20.0871	19.6331	19.6691	26.1873	25.1307
	0.497421	1.32417	K.N[+1647.613]ATYGYVLDDPDPDDGFNYK.Q	HexNAc(5)Hex(3)Fuc(1)	N[+1648]	>sp|O43852|CALU_HUMAN Calumenin OS=Homo sapiens OX=9606 GN=CALU PE=1 SV=2	Color2 [DarkGray]	1	4		22.7226	19.5661	19.9314	19.2293	18.4874	20.5309
	1.61931	-3.9081	K.N[+1647.613]ISQDLEK.Q	HexNAc(5)Hex(3)Fuc(1)	N[+1648]	>sp|P11047|LAMC1_HUMAN Laminin subunit gamma-1 OS=Homo sapiens OX=9606 GN=LAMC1 PE=1 SV=3	Color2 [DarkGray]	1	4		19.4431	19.0534	20.0289	24.6278	24.3329	21.2891
+	2.21468	-4.89349	K.N[+1663.608]ISQDLEK.Q	HexNAc(5)Hex(4)	N[+1664]	>sp|P11047|LAMC1_HUMAN Laminin subunit gamma-1 OS=Homo sapiens OX=9606 GN=LAMC1 PE=1 SV=3	Color2 [DarkGray]	1	4		18.7985	19.0452	18.3279	23.8463	25.0482	21.9574
	0.0896205	0.167543	K.N[+1694.603]C[+57.021]SAAC[+57.021]PGLQLSNNPVK.G	HexNAc(3)Hex(4)Fuc(1)NeuAc(1)	C[+57]*2, N[+1695]	>sp|P05107|ITB2_HUMAN Integrin beta-2 OS=Homo sapiens OX=9606 GN=ITGB2 PE=1 SV=2	Color2 [DarkGray]	1	4		19.5083	20.0418	19.8823	18.4218	20.6192	19.8889
+	3.6247	3.71925	K.N[+1702.581]ATLAEQAK.L	HexNAc(2)Hex(8)	N[+1703]	>sp|Q9Y4L1|HYOU1_HUMAN Hypoxia up-regulated protein 1 OS=Homo sapiens OX=9606 GN=HYOU1 PE=1 SV=1	Color2 [DarkGray]	1	4		29.2979	28.8684	29.039	25.362	24.8741	25.8115
	0.195047	-0.466476	K.N[+1702.581]ATSYPPM[+15.995]C[+57.021]TQDPK.A	HexNAc(2)Hex(8)	C[+57], M[+16], N[+1703]	>sp|P23141|EST1_HUMAN Liver carboxylesterase 1 OS=Homo sapiens OX=9606 GN=CES1 PE=1 SV=2	Color2 [DarkGray]	1	4		20.7199	19.8916	19.441	21.178	21.459	18.8149
+	2.62683	-2.65711	K.N[+1702.581]ATSYPPMC[+57.021]TQDPK.A	HexNAc(2)Hex(8)	C[+57], N[+1703]	>sp|P23141|EST1_HUMAN Liver carboxylesterase 1 OS=Homo sapiens OX=9606 GN=CES1 PE=1 SV=2	Color2 [DarkGray]	1	4		24.8234	24.0465	25.0561	27.0179	27.7728	27.1066
	0.268385	1.50517	K.N[+1702.581]C[+57.021]SAAC[+57.021]PGLQLSNNPVK.G	HexNAc(2)Hex(8)	C[+57]*2, N[+1703]	>sp|P05107|ITB2_HUMAN Integrin beta-2 OS=Homo sapiens OX=9606 GN=ITGB2 PE=1 SV=2	Color2 [DarkGray]	1	4		24.886	25.7524	25.1454	26.1345	25.8318	19.302
+	3.57169	4.41827	K.N[+1702.581]C[+57.021]TSISGDLHILPVAFR.G	HexNAc(2)Hex(8)	C[+57], N[+1703]	>sp|P00533|EGFR_HUMAN Epidermal growth factor receptor OS=Homo sapiens OX=9606 GN=EGFR PE=1 SV=2	Color2 [DarkGray]	1	4		24.8383	24.7274	25.8656	20.6328	20.7637	20.78
	0.975451	-1.16748	K.N[+1702.581]ETIWYLK.Y	HexNAc(2)Hex(8)	N[+1703]	>sp|O15342|VA0E1_HUMAN V-type proton ATPase subunit e 1 OS=Homo sapiens OX=9606 GN=ATP6V0E1 PE=1 SV=2	Color2 [DarkGray]	1	4		19.6933	19.7905	18.4168	21.1158	19.9415	20.3458
	3.46172	1.48366	K.N[+1702.581]LTLMATTSQLPK.L	HexNAc(2)Hex(8)	N[+1703]	>sp|P11117|PPAL_HUMAN Lysosomal acid phosphatase OS=Homo sapiens OX=9606 GN=ACP2 PE=1 SV=3	Color2 [DarkGray]	1	4		20.7624	20.6309	20.5795	19.3497	18.947	19.2251
	1.77992	1.90996	K.N[+1702.581]M[+15.995]SFVNDLTVTQDGR.K	HexNAc(2)Hex(8)	M[+16], N[+1703]	>sp|Q9HDC9|APMAP_HUMAN Adipocyte plasma membrane-associated protein OS=Homo sapiens OX=9606 GN=APMAP PE=1 SV=2	Color2 [DarkGray]	1	4		22.0801	20.9871	21.805	19.0952	20.3158	19.7312
	1.37212	1.67901	K.N[+1702.581]MSFVNDLTVTQDGR.K	HexNAc(2)Hex(8)	N[+1703]	>sp|Q9HDC9|APMAP_HUMAN Adipocyte plasma membrane-associated protein OS=Homo sapiens OX=9606 GN=APMAP PE=1 SV=2	Color2 [DarkGray]	1	4		26.4313	26.7632	26.7752	25.1968	25.8194	23.9165
+	2.8467	5.223	K.N[+1702.581]MSFVNDLTVTQDGRK.I	HexNAc(2)Hex(8)	N[+1703]	>sp|Q9HDC9|APMAP_HUMAN Adipocyte plasma membrane-associated protein OS=Homo sapiens OX=9606 GN=APMAP PE=1 SV=2	Color2 [DarkGray]	1	4		25.031	23.7556	24.6941	20.2444	18.359	19.2084
	0.747678	-2.50992	K.N[+1702.581]NTIYVDNFDK.L	HexNAc(2)Hex(8)	N[+1703]	>sp|A8TX70|CO6A5_HUMAN Collagen alpha-5(VI) chain OS=Homo sapiens OX=9606 GN=COL6A5 PE=1 SV=1	Color2 [DarkGray]	1	4		19.5752	19.5101	19.0892	24.1886	22.5284	18.9873
	0.689638	-1.53	K.N[+1702.581]VTLLSR.Y	HexNAc(2)Hex(8)	N[+1703]	>sp|Q07075|AMPE_HUMAN Glutamyl aminopeptidase OS=Homo sapiens OX=9606 GN=ENPEP PE=1 SV=3	Color2 [DarkGray]	1	4		19.5163	18.0669	19.8388	22.2159	20.5129	19.2831
	0.43915	-1.8331	K.N[+1702.581]YTADYDK.A	HexNAc(2)Hex(8)	N[+1703]	>sp|O94905|ERLN2_HUMAN Erlin-2 OS=Homo sapiens OX=9606 GN=ERLIN2 PE=1 SV=1	Color2 [DarkGray]	1	4		17.9822	23.3381	23.3594	23.459	23.2448	23.4752
	1.22426	1.65539	K.N[+1710.598]C[+57.021]SAAC[+57.021]PGLQLSNNPVK.G	HexNAc(3)Hex(5)NeuAc(1)	C[+57]*2, N[+1711]	>sp|P05107|ITB2_HUMAN Integrin beta-2 OS=Homo sapiens OX=9606 GN=ITGB2 PE=1 SV=2	Color2 [DarkGray]	1	4		22.2499	20.9685	20.6028	18.8379	20.0827	19.9345
+	2.73879	-6.15536	K.N[+1710.598]GSLFAFR.G	HexNAc(3)Hex(5)NeuAc(1)	N[+1711]	>sp|P04004|VTNC_HUMAN Vitronectin OS=Homo sapiens OX=9606 GN=VTN PE=1 SV=1	Color2 [DarkGray]	1	4		20.3118	19.675	19.1296	26.9479	26.2487	24.3858
	0.440672	0.822594	K.N[+1710.598]VTAQIC[+57.021]IDK.K	HexNAc(3)Hex(5)NeuAc(1)	C[+57], N[+1711]	>sp|P12109|CO6A1_HUMAN Collagen alpha-1(VI) chain OS=Homo sapiens OX=9606 GN=COL6A1 PE=1 SV=3	Color2 [DarkGray]	1	4		24.0934	24.4395	24.7663	23.4817	22.3334	25.0163
	1.30411	-2.94276	K.N[+1710.598]VTAQIC[+57.021]IDKK.C	HexNAc(3)Hex(5)NeuAc(1)	C[+57], N[+1711]	>sp|P12109|CO6A1_HUMAN Collagen alpha-1(VI) chain OS=Homo sapiens OX=9606 GN=COL6A1 PE=1 SV=3	Color2 [DarkGray]	1	4		26.5792	23.6169	26.6575	28.8882	28.915	27.8787
	1.44621	-6.04476	K.N[+1768.640]ISQDLEK.Q	HexNAc(4)Hex(5)Fuc(1)	N[+1769]	>sp|P11047|LAMC1_HUMAN Laminin subunit gamma-1 OS=Homo sapiens OX=9606 GN=LAMC1 PE=1 SV=3	Color2 [DarkGray]	1	4		19.2396	19.6216	25.1079	27.7843	27.7969	26.5222
	0.786959	-1.68132	K.N[+1768.640]LSIQVGK.S	HexNAc(4)Hex(5)Fuc(1)	N[+1769]	>sp|A8TX70|CO6A5_HUMAN Collagen alpha-5(VI) chain OS=Homo sapiens OX=9606 GN=COL6A5 PE=1 SV=1	Color2 [DarkGray]	1	4		18.3877	20.0885	19.3118	22.153	21.3856	19.2932
	0.352364	1.58012	K.N[+1809.666]ASVSISHNSC[+57.021]TAPDK.T	HexNAc(5)Hex(4)Fuc(1)	C[+57], N[+1810]	>sp|P08575|PTPRC_HUMAN Receptor-type tyrosine-protein phosphatase C OS=Homo sapiens OX=9606 GN=PTPRC PE=1 SV=3	Color2 [DarkGray]	1	4		19.621	24.8724	19.007	19.5765	19.4298	19.7538
+	3.87883	-6.88004	K.N[+1809.666]ISQDLEK.Q	HexNAc(5)Hex(4)Fuc(1)	N[+1810]	>sp|P11047|LAMC1_HUMAN Laminin subunit gamma-1 OS=Homo sapiens OX=9606 GN=LAMC1 PE=1 SV=3	Color2 [DarkGray]	1	4		18.9087	19.1984	18.0336	26.1562	25.5804	25.0441
	0.182253	1.02917	K.N[+1864.634]ATLAEQAK.L	HexNAc(2)Hex(9)	N[+1865]	>sp|Q9Y4L1|HYOU1_HUMAN Hypoxia up-regulated protein 1 OS=Homo sapiens OX=9606 GN=HYOU1 PE=1 SV=1	Color2 [DarkGray]	1	4		19.4582	24.7253	25.3373	23.5483	20.0448	22.8402
	1.43833	-5.05121	K.N[+1864.634]ATSYPPMC[+57.021]TQDPK.A	HexNAc(2)Hex(9)	C[+57], N[+1865]	>sp|P23141|EST1_HUMAN Liver carboxylesterase 1 OS=Homo sapiens OX=9606 GN=CES1 PE=1 SV=2	Color2 [DarkGray]	1	4		24.2182	24.3693	19.4757	27.4307	28.3212	27.4649
	0.388621	-0.451012	K.N[+1864.634]C[+57.021]SAAC[+57.021]PGLQLSNNPVK.G	HexNAc(2)Hex(9)	C[+57]*2, N[+1865]	>sp|P05107|ITB2_HUMAN Integrin beta-2 OS=Homo sapiens OX=9606 GN=ITGB2 PE=1 SV=2	Color2 [DarkGray]	1	4		22.1057	22.4951	21.8483	23.363	21.8002	22.6389
+	2.15532	3.21587	K.N[+1864.634]C[+57.021]TSISGDLHILPVAFR.G	HexNAc(2)Hex(9)	C[+57], N[+1865]	>sp|P00533|EGFR_HUMAN Epidermal growth factor receptor OS=Homo sapiens OX=9606 GN=EGFR PE=1 SV=2	Color2 [DarkGray]	1	4		23.5676	21.5758	22.7456	19.5278	19.7836	18.9299
	0.209287	-0.564212	K.N[+1864.634]C[+57.021]TSYGVLDISK.C	HexNAc(2)Hex(9)	C[+57], N[+1865]	>sp|P16671|CD36_HUMAN Platelet glycoprotein 4 OS=Homo sapiens OX=9606 GN=CD36 PE=1 SV=2	Color2 [DarkGray]	1	4		19.7401	20.9001	18.1583	19.0208	21.3648	20.1055
	1.90046	1.88368	K.N[+1864.634]GTSFDIHYGSGSLSGYLSQDTVSVPC[+57.021]QSASSASALGGVK.V	HexNAc(2)Hex(9)	C[+57], N[+1865]	>sp|P07339|CATD_HUMAN Cathepsin D OS=Homo sapiens OX=9606 GN=CTSD PE=1 SV=1	Color2 [DarkGray]	1	4		21.6399	20.1594	20.9488	19.1371	19.1097	18.8503
	1.1238	0.88402	K.N[+1864.634]LTLMATTSQLPK.L	HexNAc(2)Hex(9)	N[+1865]	>sp|P11117|PPAL_HUMAN Lysosomal acid phosphatase OS=Homo sapiens OX=9606 GN=ACP2 PE=1 SV=3	Color2 [DarkGray]	1	4		19.5161	20.7213	19.8686	19.0667	19.3392	19.0481
	0.383498	0.580301	K.N[+1864.634]MSFVNDLTVTQDGR.K	HexNAc(2)Hex(9)	N[+1865]	>sp|Q9HDC9|APMAP_HUMAN Adipocyte plasma membrane-associated protein OS=Homo sapiens OX=9606 GN=APMAP PE=1 SV=2	Color2 [DarkGray]	1	4		20.226	20.282	20.2498	18.424	20.0816	20.5112
+	3.44645	-5.3752	K.N[+1864.634]NTIYVDNFDK.L	HexNAc(2)Hex(9)	N[+1865]	>sp|A8TX70|CO6A5_HUMAN Collagen alpha-5(VI) chain OS=Homo sapiens OX=9606 GN=COL6A5 PE=1 SV=1	Color2 [DarkGray]	1	4		19.6292	19.3557	18.9357	23.8198	25.0276	25.1987
	0.468439	-2.58022	K.N[+1864.634]VTLLSR.Y	HexNAc(2)Hex(9)	N[+1865]	>sp|Q07075|AMPE_HUMAN Glutamyl aminopeptidase OS=Homo sapiens OX=9606 GN=ENPEP PE=1 SV=3	Color2 [DarkGray]	1	4		19.5739	18.869	19.5464	21.5967	26.1681	17.9651
	0.1728	-1.08174	K.N[+1864.634]YTADYDK.A	HexNAc(2)Hex(9)	N[+1865]	>sp|O94905|ERLN2_HUMAN Erlin-2 OS=Homo sapiens OX=9606 GN=ERLIN2 PE=1 SV=1	Color2 [DarkGray]	1	4		19.91	22.8306	20.3591	23.779	17.7762	24.7898
	0.78972	1.18957	K.N[+1866.688]GTSFDIHYGSGSLSGYLSQDTVSVPC[+57.021]QSASSASALGGVK.V	HexNAc(6)Hex(4)	C[+57], N[+1867]	>sp|P07339|CATD_HUMAN Cathepsin D OS=Homo sapiens OX=9606 GN=CTSD PE=1 SV=1	Color2 [DarkGray]	1	4		21.6399	20.2345	19.3662	19.0577	18.9708	19.6435
+	3.67485	4.78313	K.N[+1872.651]C[+57.021]SAAC[+57.021]PGLQLSNNPVK.G	HexNAc(3)Hex(6)NeuAc(1)	C[+57]*2, N[+1873]	>sp|P05107|ITB2_HUMAN Integrin beta-2 OS=Homo sapiens OX=9606 GN=ITGB2 PE=1 SV=2	Color2 [DarkGray]	1	4		23.7511	23.9804	24.0054	19.8537	18.7188	18.8151
	0.851442	2.48415	K.N[+1872.651]C[+57.021]TSISGDLHILPVAFR.G	HexNAc(3)Hex(6)NeuAc(1)	C[+57], N[+1873]	>sp|P00533|EGFR_HUMAN Epidermal growth factor receptor OS=Homo sapiens OX=9606 GN=EGFR PE=1 SV=2	Color2 [DarkGray]	1	4		20.7522	23.7349	19.3081	18.1683	19.4533	18.7212
+	3.62367	-6.20702	K.N[+1872.651]GSLFAFR.G	HexNAc(3)Hex(6)NeuAc(1)	N[+1873]	>sp|P04004|VTNC_HUMAN Vitronectin OS=Homo sapiens OX=9606 GN=VTN PE=1 SV=1	Color2 [DarkGray]	1	4		18.6698	19.6694	19.0949	26.0509	25.3557	24.6485
	0.474998	-1.16693	K.N[+1872.651]NSIPDK.Q	HexNAc(3)Hex(6)NeuAc(1)	N[+1873]	>sp|Q08431|MFGM_HUMAN Lactadherin OS=Homo sapiens OX=9606 GN=MFGE8 PE=1 SV=3	Color2 [DarkGray]	1	4		18.8618	19.8409	18.7818	20.4304	18.5309	22.0241
	0.233412	-1.41324	K.N[+1872.651]VTAQIC[+57.021]IDK.K	HexNAc(3)Hex(6)NeuAc(1)	C[+57], N[+1873]	>sp|P12109|CO6A1_HUMAN Collagen alpha-1(VI) chain OS=Homo sapiens OX=9606 GN=COL6A1 PE=1 SV=3	Color2 [DarkGray]	1	4		24.4631	20.0067	24.3105	26.4387	25.9842	20.5972
	1.94391	-6.92476	K.N[+1872.651]VTAQIC[+57.021]IDKK.C	HexNAc(3)Hex(6)NeuAc(1)	C[+57], N[+1873]	>sp|P12109|CO6A1_HUMAN Collagen alpha-1(VI) chain OS=Homo sapiens OX=9606 GN=COL6A1 PE=1 SV=3	Color2 [DarkGray]	1	4		24.4825	20.7295	19.3868	27.9336	28.3556	29.0839
	0.922275	-4.18339	K.N[+1913.677]GSLFAFR.G	HexNAc(4)Hex(5)NeuAc(1)	N[+1914]	>sp|P04004|VTNC_HUMAN Vitronectin OS=Homo sapiens OX=9606 GN=VTN PE=1 SV=1	Color2 [DarkGray]	1	4		19.8288	18.5369	18.8174	25.6544	24.9812	19.0977
	1.00119	3.81977	K.N[+1913.677]GTAVC[+57.021]ATNR.R	HexNAc(4)Hex(5)NeuAc(1)	C[+57], N[+1914]	>sp|P05156|CFAI_HUMAN Complement factor I OS=Homo sapiens OX=9606 GN=CFI PE=1 SV=2	Color2 [DarkGray]	1	4		25.1802	19.8076	25.0654	19.4806	19.9888	19.1244
	0.990425	-2.14288	K.N[+1913.677]VTAQIC[+57.021]IDK.K	HexNAc(4)Hex(5)NeuAc(1)	C[+57], N[+1914]	>sp|P12109|CO6A1_HUMAN Collagen alpha-1(VI) chain OS=Homo sapiens OX=9606 GN=COL6A1 PE=1 SV=3	Color2 [DarkGray]	1	4		18.8472	19.0071	19.4085	21.0142	23.0617	19.6156
	1.64351	-6.28497	K.N[+1913.677]VTAQIC[+57.021]IDKK.C	HexNAc(4)Hex(5)NeuAc(1)	C[+57], N[+1914]	>sp|P12109|CO6A1_HUMAN Collagen alpha-1(VI) chain OS=Homo sapiens OX=9606 GN=COL6A1 PE=1 SV=3	Color2 [DarkGray]	1	4		19.0723	18.4415	20.7091	22.4761	27.2235	27.3782
	1.06882	-2.08277	K.N[+1971.719]ISQDLEK.Q	HexNAc(5)Hex(5)Fuc(1)	N[+1972]	>sp|P11047|LAMC1_HUMAN Laminin subunit gamma-1 OS=Homo sapiens OX=9606 GN=LAMC1 PE=1 SV=3	Color2 [DarkGray]	1	4		20.0163	20.1385	19.7047	23.3988	20.3184	22.3905
+	2.47633	-7.03032	K.N[+2059.735]C[+57.021]TSYGVLDISK.C	HexNAc(4)Hex(5)Fuc(1)NeuAc(1)	C[+57], N[+2060]	>sp|P16671|CD36_HUMAN Platelet glycoprotein 4 OS=Homo sapiens OX=9606 GN=CD36 PE=1 SV=2	Color2 [DarkGray]	1	4		18.5014	19.3693	19.7593	27.3519	24.1182	27.2509
	1.0937	-3.76264	K.N[+2059.735]ETLALPAESK.T	HexNAc(4)Hex(5)Fuc(1)NeuAc(1)	N[+2060]	>sp|Q7Z7G0|TARSH_HUMAN Target of Nesh-SH3 OS=Homo sapiens OX=9606 GN=ABI3BP PE=1 SV=1	Color2 [DarkGray]	1	4		18.7827	19.5766	18.091	24.5127	19.493	23.7326
	0.225708	-1.45243	K.N[+2059.735]ISQDLEK.Q	HexNAc(4)Hex(5)Fuc(1)NeuAc(1)	N[+2060]	>sp|P11047|LAMC1_HUMAN Laminin subunit gamma-1 OS=Homo sapiens OX=9606 GN=LAMC1 PE=1 SV=3	Color2 [DarkGray]	1	4		25.1453	23.0481	19.2198	26.3201	20.3469	25.1034
+	3.27267	-5.67504	K.N[+2059.735]LSIQVGK.S	HexNAc(4)Hex(5)Fuc(1)NeuAc(1)	N[+2060]	>sp|A8TX70|CO6A5_HUMAN Collagen alpha-5(VI) chain OS=Homo sapiens OX=9606 GN=COL6A5 PE=1 SV=1	Color2 [DarkGray]	1	4		19.5432	19.4077	19.5906	24.774	26.2922	24.5003
	1.24089	-1.15998	K.N[+2059.735]VTAQIC[+57.021]IDK.K	HexNAc(4)Hex(5)Fuc(1)NeuAc(1)	C[+57], N[+2060]	>sp|P12109|CO6A1_HUMAN Collagen alpha-1(VI) chain OS=Homo sapiens OX=9606 GN=COL6A1 PE=1 SV=3	Color2 [DarkGray]	1	4		20.1313	20.6266	19.9892	20.6749	22.0248	21.5274
	0.010387	-0.111378	K.N[+2204.772]GSLFAFR.G	HexNAc(4)Hex(5)NeuAc(2)	N[+2205]	>sp|P04004|VTNC_HUMAN Vitronectin OS=Homo sapiens OX=9606 GN=VTN PE=1 SV=1	Color2 [DarkGray]	1	4		27.3533	28.526	18.7548	23.9147	28.3788	22.6748
	1.49844	-1.38176	K.N[+2204.772]LSMPLLPADFHK.E	HexNAc(4)Hex(5)NeuAc(2)	N[+2205]	>sp|P05546|HEP2_HUMAN Heparin cofactor 2 OS=Homo sapiens OX=9606 GN=SERPIND1 PE=1 SV=3	Color2 [DarkGray]	1	4		23.7025	23.679	22.7207	25.2612	24.3036	24.6827
	0.721823	-2.9207	K.N[+2256.851]C[+57.021]SAAC[+57.021]PGLQLSNNPVK.G	HexNAc(8)Hex(3)Fuc(1)	C[+57]*2, N[+2257]	>sp|P05107|ITB2_HUMAN Integrin beta-2 OS=Homo sapiens OX=9606 GN=ITGB2 PE=1 SV=2	Color2 [DarkGray]	1	4		17.806	19.1685	18.6312	17.8397	23.2296	23.2985
	0.792082	-2.77073	K.N[+2350.830]ISQDLEK.Q	HexNAc(4)Hex(5)Fuc(1)NeuAc(2)	N[+2351]	>sp|P11047|LAMC1_HUMAN Laminin subunit gamma-1 OS=Homo sapiens OX=9606 GN=LAMC1 PE=1 SV=3	Color2 [DarkGray]	1	4		19.0672	19.4393	17.7712	20.693	24.5046	19.3923
+	4.7367	-8.17614	K.N[+2350.830]LSIQVGK.S	HexNAc(4)Hex(5)Fuc(1)NeuAc(2)	N[+2351]	>sp|A8TX70|CO6A5_HUMAN Collagen alpha-5(VI) chain OS=Homo sapiens OX=9606 GN=COL6A5 PE=1 SV=1	Color2 [DarkGray]	1	4		19.3165	18.4181	19.1156	26.7096	27.3217	27.3472
	0.0431844	-0.164344	K.N[+2393.873]MSFVNDLTVTQDGR.K	HexNAc(7)Hex(6)	N[+2394]	>sp|Q9HDC9|APMAP_HUMAN Adipocyte plasma membrane-associated protein OS=Homo sapiens OX=9606 GN=APMAP PE=1 SV=2	Color2 [DarkGray]	1	4		22.6614	18.4868	19.2944	20.0998	20.0755	20.7602
	0.0633625	0.156254	K.N[+2424.867]ASVSISHNSC[+57.021]TAPDK.T	HexNAc(5)Hex(6)Fuc(1)NeuAc(1)	C[+57], N[+2425]	>sp|P08575|PTPRC_HUMAN Receptor-type tyrosine-protein phosphatase C OS=Homo sapiens OX=9606 GN=PTPRC PE=1 SV=3	Color2 [DarkGray]	1	4		18.3077	19.2534	20.1433	19.6971	17.7322	19.8064
	0.183072	0.630624	K.N[+2424.867]MSFVNDLTVTQDGR.K	HexNAc(5)Hex(6)Fuc(1)NeuAc(1)	N[+2425]	>sp|Q9HDC9|APMAP_HUMAN Adipocyte plasma membrane-associated protein OS=Homo sapiens OX=9606 GN=APMAP PE=1 SV=2	Color2 [DarkGray]	1	4		22.2016	17.672	20.0189	19.3415	19.1345	19.5246
	0.600264	-1.67957	K.N[+4393.550]YTADYDK.A	HexNAc(8)Hex(9)Fuc(1)NeuAc(4)	N[+4394]	>sp|O94905|ERLN2_HUMAN Erlin-2 OS=Homo sapiens OX=9606 GN=ERLIN2 PE=1 SV=1	Color2 [DarkGray]	1	4		19.6751	19.6654	18.7343	23.459	19.9627	19.6918
	0.566272	0.978975	K.N[+892.317]ATLAEQAK.L	HexNAc(2)Hex(3)	N[+892]	>sp|Q9Y4L1|HYOU1_HUMAN Hypoxia up-regulated protein 1 OS=Homo sapiens OX=9606 GN=HYOU1 PE=1 SV=1	Color2 [DarkGray]	1	4		20.0824	19.5295	21.6964	20.0135	19.6985	18.6593
+	2.88331	-5.46337	K.NAC[+57.021]C[+57.021]STN[+1768.640]TSQEAHKDVSYLYR.F	HexNAc(4)Hex(5)Fuc(1)	C[+57]*2, N[+1769]	>sp|P15328|FOLR1_HUMAN Folate receptor alpha OS=Homo sapiens OX=9606 GN=FOLR1 PE=1 SV=3	Color2 [DarkGray]	1	4		19.3978	19.0641	18.2634	23.2308	24.6703	25.2144
	0.137471	-0.176106	K.NALN[+1216.423]LTFHAQNVGEGGAYEAELR.V	HexNAc(2)Hex(5)	N[+1216]	>sp|P08648|ITA5_HUMAN Integrin alpha-5 OS=Homo sapiens OX=9606 GN=ITGA5 PE=1 SV=2	Color2 [DarkGray]	1	4		20.0927	19.8772	19.1039	19.1617	20.3875	20.0528
	1.85391	-1.35649	K.NALN[+1378.476]LTFHAQNVGEGGAYEAELR.V	HexNAc(2)Hex(6)	N[+1378]	>sp|P08648|ITA5_HUMAN Integrin alpha-5 OS=Homo sapiens OX=9606 GN=ITGA5 PE=1 SV=2	Color2 [DarkGray]	1	4		18.7309	18.3174	18.4219	19.2483	20.0971	20.1942
	0.0241791	0.0663548	K.NALN[+1540.529]LTFHAQNVGEGGAYEAELR.V	HexNAc(2)Hex(7)	N[+1541]	>sp|P08648|ITA5_HUMAN Integrin alpha-5 OS=Homo sapiens OX=9606 GN=ITGA5 PE=1 SV=2	Color2 [DarkGray]	1	4		18.2817	18.6178	20.8935	19.1992	18.4837	19.911
	0.114197	-0.258987	K.NALN[+1581.555]LTFHAQNVGEGGAYEAELR.V	HexNAc(3)Hex(6)	N[+1582]	>sp|P08648|ITA5_HUMAN Integrin alpha-5 OS=Homo sapiens OX=9606 GN=ITGA5 PE=1 SV=2	Color2 [DarkGray]	1	4		21.0812	19.2838	19.2479	19.0494	20.4286	20.9119
	0.141783	-0.40531	K.NC[+57.021]GVN[+2204.772]C[+57.021]SGDVFTALIGEIASPNYPKPYPENSR.C	HexNAc(4)Hex(5)NeuAc(2)	C[+57]*2, N[+2205]	>sp|P09871|C1S_HUMAN Complement C1s subcomponent OS=Homo sapiens OX=9606 GN=C1S PE=1 SV=1	Color2 [DarkGray]	1	4		19.914	19.7372	20.0955	22.4039	19.5626	18.9962
	1.00005	-2.69852	K.NDRN[+1038.375]SSDETFLK.D	HexNAc(2)Hex(3)Fuc(1)	N[+1038]	>sp|Q14956|GPNMB_HUMAN Transmembrane glycoprotein NMB OS=Homo sapiens OX=9606 GN=GPNMB PE=1 SV=2	Color2 [DarkGray]	1	4		19.9423	19.7537	17.5608	23.0504	22.5115	19.7904
	0.304598	0.72391	K.NDRN[+1694.603]SSDETFLK.D	HexNAc(3)Hex(4)Fuc(1)NeuAc(1)	N[+1695]	>sp|Q14956|GPNMB_HUMAN Transmembrane glycoprotein NMB OS=Homo sapiens OX=9606 GN=GPNMB PE=1 SV=2	Color2 [DarkGray]	1	4		19.0694	21.6403	19.7548	18.4705	20.4976	19.3248
	0.751793	-0.868602	K.NELMLN[+1784.634]SSLMR.I	HexNAc(4)Hex(6)	N[+1785]	>sp|O00468|AGRIN_HUMAN Agrin OS=Homo sapiens OX=9606 GN=AGRN PE=1 SV=6	Color2 [DarkGray]	1	4		19.8163	19.4543	19.7691	20.6828	19.5909	21.3719
+	3.56031	2.54155	K.NIETFTC[+57.021]DTQN[+2059.735]ITYR.F	HexNAc(4)Hex(5)Fuc(1)NeuAc(1)	C[+57], N[+2060]	>sp|P08575|PTPRC_HUMAN Receptor-type tyrosine-protein phosphatase C OS=Homo sapiens OX=9606 GN=PTPRC PE=1 SV=3	Color2 [DarkGray]	1	4		21.67	22.1293	22.0117	19.6926	19.1414	19.3523
	0.675109	1.40973	K.NIETFTC[+57.021]DTQN[+2424.867]ITYR.F	HexNAc(5)Hex(6)Fuc(1)NeuAc(1)	C[+57], N[+2425]	>sp|P08575|PTPRC_HUMAN Receptor-type tyrosine-protein phosphatase C OS=Homo sapiens OX=9606 GN=PTPRC PE=1 SV=3	Color2 [DarkGray]	1	4		20.3318	22.6628	20.0308	18.7249	20.2582	19.8131
	0.44334	1.43417	K.NIETFTC[+57.021]DTQN[+2789.999]ITYR.F	HexNAc(6)Hex(7)Fuc(1)NeuAc(1)	C[+57], N[+2790]	>sp|P08575|PTPRC_HUMAN Receptor-type tyrosine-protein phosphatase C OS=Homo sapiens OX=9606 GN=PTPRC PE=1 SV=3	Color2 [DarkGray]	1	4		19.3228	23.6928	19.7984	19.2917	19.5118	19.7079
	0.14457	-0.279274	K.NLKRNYIVPILWLN[+4028.418]ETGTIGDEK.A	HexNAc(7)Hex(8)Fuc(1)NeuAc(4)	N[+4028]	>sp|P16671|CD36_HUMAN Platelet glycoprotein 4 OS=Homo sapiens OX=9606 GN=CD36 PE=1 SV=2	Color2 [DarkGray]	1	4		20.1042	17.8561	19.6154	19.8434	19.0812	19.4889
	0.0769819	-0.0650883	K.NM[+15.995]QIAN[+2059.735]HTLK.Y	HexNAc(4)Hex(5)Fuc(1)NeuAc(1)	M[+16], N[+2060]	>sp|P12821|ACE_HUMAN Angiotensin-converting enzyme OS=Homo sapiens OX=9606 GN=ACE PE=1 SV=1	Color2 [DarkGray]	1	4		19.3699	19.2088	19.9555	19.4348	19.3373	19.9574
	0.927537	-3.44919	K.NMQIAN[+1768.640]HTLK.Y	HexNAc(4)Hex(5)Fuc(1)	N[+1769]	>sp|P12821|ACE_HUMAN Angiotensin-converting enzyme OS=Homo sapiens OX=9606 GN=ACE PE=1 SV=1	Color2 [DarkGray]	1	4		18.1822	20.0398	20.1782	25.9663	22.3069	20.4746
	0.328399	-1.50119	K.NMQIAN[+1809.666]HTLK.Y	HexNAc(5)Hex(4)Fuc(1)	N[+1810]	>sp|P12821|ACE_HUMAN Angiotensin-converting enzyme OS=Homo sapiens OX=9606 GN=ACE PE=1 SV=1	Color2 [DarkGray]	1	4		18.8079	18.5158	18.7301	18.5588	23.9324	18.0661
	0.715463	-2.92829	K.NMQIAN[+1971.719]HTLK.Y	HexNAc(5)Hex(5)Fuc(1)	N[+1972]	>sp|P12821|ACE_HUMAN Angiotensin-converting enzyme OS=Homo sapiens OX=9606 GN=ACE PE=1 SV=1	Color2 [DarkGray]	1	4		19.4894	20.2294	20.0895	24.7269	24.7156	19.1507
	1.77734	-7.03355	K.NMQIAN[+2059.735]HTLK.Y	HexNAc(4)Hex(5)Fuc(1)NeuAc(1)	N[+2060]	>sp|P12821|ACE_HUMAN Angiotensin-converting enzyme OS=Homo sapiens OX=9606 GN=ACE PE=1 SV=1	Color2 [DarkGray]	1	4		23.2689	19.2207	25.1592	29.6721	30.0492	29.0282
	0.866259	-4.02529	K.NMQIAN[+2262.814]HTLK.Y	HexNAc(5)Hex(5)Fuc(1)NeuAc(1)	N[+2263]	>sp|P12821|ACE_HUMAN Angiotensin-converting enzyme OS=Homo sapiens OX=9606 GN=ACE PE=1 SV=1	Color2 [DarkGray]	1	4		20.2019	19.7128	18.9758	25.4159	26.1387	19.4118
	0.306423	-1.25528	K.NN[+1694.603]HTASILDR.M	HexNAc(3)Hex(4)Fuc(1)NeuAc(1)	N[+1695]	>sp|P08962|CD63_HUMAN CD63 antigen OS=Homo sapiens OX=9606 GN=CD63 PE=1 SV=2	Color2 [DarkGray]	1	4		18.9678	22.8605	22.6915	24.418	20.726	23.1417
	0.209026	-0.36017	K.NN[+1702.581]HTASILDR.M	HexNAc(2)Hex(8)	N[+1703]	>sp|P08962|CD63_HUMAN CD63 antigen OS=Homo sapiens OX=9606 GN=CD63 PE=1 SV=2	Color2 [DarkGray]	1	4		19.2968	19.0758	18.8019	19.3109	18.3471	20.597
+	2.47421	5.60255	K.NN[+1768.640]HTASILDR.M	HexNAc(4)Hex(5)Fuc(1)	N[+1769]	>sp|P08962|CD63_HUMAN CD63 antigen OS=Homo sapiens OX=9606 GN=CD63 PE=1 SV=2	Color2 [DarkGray]	1	4		24.1958	26.7889	24.229	19.0033	19.9035	19.4992
	0.921063	2.5849	K.NN[+2059.735]HTASILDR.M	HexNAc(4)Hex(5)Fuc(1)NeuAc(1)	N[+2060]	>sp|P08962|CD63_HUMAN CD63 antigen OS=Homo sapiens OX=9606 GN=CD63 PE=1 SV=2	Color2 [DarkGray]	1	4		24.6274	25.0954	25.0424	19.7561	23.9355	23.3189
	0.157631	1.02706	K.NN[+2133.772]HTASILDR.M	HexNAc(5)Hex(6)Fuc(1)	N[+2134]	>sp|P08962|CD63_HUMAN CD63 antigen OS=Homo sapiens OX=9606 GN=CD63 PE=1 SV=2	Color2 [DarkGray]	1	4		23.4158	22.5291	19.1224	19.8152	24.5794	17.5916
	1.96788	-1.012	K.NN[+2204.772]ATVHEQVGGPSLTSDLQAQSK.G	HexNAc(4)Hex(5)NeuAc(2)	N[+2205]	>sp|P04004|VTNC_HUMAN Vitronectin OS=Homo sapiens OX=9606 GN=VTN PE=1 SV=1	Color2 [DarkGray]	1	4		24.5041	24.5046	24.5088	25.9638	25.249	25.3407
	0.10896	-0.607603	K.NN[+2350.830]HTASILDR.M	HexNAc(4)Hex(5)Fuc(1)NeuAc(2)	N[+2351]	>sp|P08962|CD63_HUMAN CD63 antigen OS=Homo sapiens OX=9606 GN=CD63 PE=1 SV=2	Color2 [DarkGray]	1	4		23.3215	18.1362	24.7662	22.646	22.8829	22.5179
	1.72243	1.55535	K.NN[+2424.867]HTASILDR.M	HexNAc(5)Hex(6)Fuc(1)NeuAc(1)	N[+2425]	>sp|P08962|CD63_HUMAN CD63 antigen OS=Homo sapiens OX=9606 GN=CD63 PE=1 SV=2	Color2 [DarkGray]	1	4		25.942	26.1062	27.2309	24.9725	24.8353	24.8053
	1.48823	1.4297	K.NN[+2715.963]HTASILDR.M	HexNAc(5)Hex(6)Fuc(1)NeuAc(2)	N[+2716]	>sp|P08962|CD63_HUMAN CD63 antigen OS=Homo sapiens OX=9606 GN=CD63 PE=1 SV=2	Color2 [DarkGray]	1	4		25.6924	24.3616	25.6537	23.6591	23.8162	23.9433
	0.379972	3.04019	K.NN[+2789.999]HTASILDR.M	HexNAc(6)Hex(7)Fuc(1)NeuAc(1)	N[+2790]	>sp|P08962|CD63_HUMAN CD63 antigen OS=Homo sapiens OX=9606 GN=CD63 PE=1 SV=2	Color2 [DarkGray]	1	4		18.0747	28.8962	19.8913	19.7342	19.3711	18.6363
	1.80128	4.98316	K.NN[+3007.058]HTASILDR.M	HexNAc(5)Hex(6)Fuc(1)NeuAc(3)	N[+3007]	>sp|P08962|CD63_HUMAN CD63 antigen OS=Homo sapiens OX=9606 GN=CD63 PE=1 SV=2	Color2 [DarkGray]	1	4		26.4112	25.5065	26.1838	23.4548	19.6422	20.055
	0.437868	1.2989	K.NN[+3446.227]HTASILDR.M	HexNAc(7)Hex(8)Fuc(1)NeuAc(2)	N[+3446]	>sp|P08962|CD63_HUMAN CD63 antigen OS=Homo sapiens OX=9606 GN=CD63 PE=1 SV=2	Color2 [DarkGray]	1	4		18.2707	22.1834	18.8635	18.1265	19.2086	18.0856
	0.292438	-0.261971	K.NNIDFPGHN[+1864.634]YTTR.N	HexNAc(2)Hex(9)	N[+1865]	>sp|Q99572|P2RX7_HUMAN P2X purinoceptor 7 OS=Homo sapiens OX=9606 GN=P2RX7 PE=1 SV=4	Color2 [DarkGray]	1	4		24.1155	23.2631	24.0702	23.6272	24.1948	24.4127
	0.00959925	0.029384	K.NNIWYPKFN[+2059.735]FSK.R	HexNAc(4)Hex(5)Fuc(1)NeuAc(1)	N[+2060]	>sp|Q99571|P2RX4_HUMAN P2X purinoceptor 4 OS=Homo sapiens OX=9606 GN=P2RX4 PE=1 SV=2	Color2 [DarkGray]	1	4		20.3771	19.8688	20.692	18.9267	22.1843	19.7387
	0.234049	-0.918914	K.NSAGN[+1216.423]HTNHPHMDC[+57.021]VITGR.P	HexNAc(2)Hex(5)	C[+57], N[+1216]	>sp|Q96CC6|RHDF1_HUMAN Inactive rhomboid protein 1 OS=Homo sapiens OX=9606 GN=RHBDF1 PE=1 SV=2	Color2 [DarkGray]	1	4		18.9057	18.7732	22.0461	23.0405	19.5464	19.8949
	1.19447	-1.99706	K.NSFN[+1622.582]ISNLLVLHLSHNR.I	HexNAc(4)Hex(5)	N[+1623]	>sp|P51888|PRELP_HUMAN Prolargin OS=Homo sapiens OX=9606 GN=PRELP PE=1 SV=1	Color2 [DarkGray]	1	4		19.1086	19.1234	19.4015	19.7402	22.3997	21.4848
	0.671541	-2.44029	K.NSFN[+1913.677]ISNLLVLHLSHNR.I	HexNAc(4)Hex(5)NeuAc(1)	N[+1914]	>sp|P51888|PRELP_HUMAN Prolargin OS=Homo sapiens OX=9606 GN=PRELP PE=1 SV=1	Color2 [DarkGray]	1	4		19.1357	19.445	21.1331	21.5822	25.2888	20.1636
	0.580165	-2.01962	K.NSFN[+1987.714]ISNLLVLHLSHNR.I	HexNAc(5)Hex(6)	N[+1988]	>sp|P51888|PRELP_HUMAN Prolargin OS=Homo sapiens OX=9606 GN=PRELP PE=1 SV=1	Color2 [DarkGray]	1	4		18.7427	19.8971	19.0716	20.1546	24.2486	19.3672
	0.515154	-3.32372	K.NSFN[+2059.735]ISNLLVLHLSHNR.I	HexNAc(4)Hex(5)Fuc(1)NeuAc(1)	N[+2060]	>sp|P51888|PRELP_HUMAN Prolargin OS=Homo sapiens OX=9606 GN=PRELP PE=1 SV=1	Color2 [DarkGray]	1	4		18.9645	19.7572	20.1306	21.1288	28.4529	19.2417
	1.74129	-2.95066	K.NSFN[+2204.772]ISNLLVLHLSHNR.I	HexNAc(4)Hex(5)NeuAc(2)	N[+2205]	>sp|P51888|PRELP_HUMAN Prolargin OS=Homo sapiens OX=9606 GN=PRELP PE=1 SV=1	Color2 [DarkGray]	1	4		25.1093	25.4079	23.6207	27.0206	28.7102	27.2591
	0.468041	-0.65473	K.NSFN[+2272.846]ISNLLVLHLSHNR.I	HexNAc(8)Hex(4)	N[+2273]	>sp|P51888|PRELP_HUMAN Prolargin OS=Homo sapiens OX=9606 GN=PRELP PE=1 SV=1	Color2 [DarkGray]	1	4		18.9358	19.5891	18.7314	19.9252	18.7131	20.5821
	0.0418334	0.16114	K.NSFN[+2278.809]ISNLLVLHLSHNR.I	HexNAc(5)Hex(6)NeuAc(1)	N[+2279]	>sp|P51888|PRELP_HUMAN Prolargin OS=Homo sapiens OX=9606 GN=PRELP PE=1 SV=1	Color2 [DarkGray]	1	4		22.3899	22.7322	20.0866	19.614	23.0128	22.0985
	0.83715	2.94696	K.NSFN[+2569.905]ISNLLVLHLSHNR.I	HexNAc(5)Hex(6)NeuAc(2)	N[+2570]	>sp|P51888|PRELP_HUMAN Prolargin OS=Homo sapiens OX=9606 GN=PRELP PE=1 SV=1	Color2 [DarkGray]	1	4		26.3855	21.9988	24.5702	21.4784	23.0883	19.5469
	0.73769	-2.84346	K.NSFN[+2643.941]ISNLLVLHLSHNR.I	HexNAc(6)Hex(7)NeuAc(1)	N[+2644]	>sp|P51888|PRELP_HUMAN Prolargin OS=Homo sapiens OX=9606 GN=PRELP PE=1 SV=1	Color2 [DarkGray]	1	4		19.7883	21.2928	18.3288	19.6042	24.65	23.686
	0.446775	-0.799581	K.NSFN[+2935.037]ISNLLVLHLSHNR.I	HexNAc(6)Hex(7)NeuAc(2)	N[+2935]	>sp|P51888|PRELP_HUMAN Prolargin OS=Homo sapiens OX=9606 GN=PRELP PE=1 SV=1	Color2 [DarkGray]	1	4		18.618	18.4775	19.1975	21.0174	18.6219	19.0525
	0.486786	-1.28357	K.NSFN[+3210.137]ISNLLVLHLSHNR.I	HexNAc(6)Hex(6)Fuc(1)NeuAc(3)	N[+3210]	>sp|P51888|PRELP_HUMAN Prolargin OS=Homo sapiens OX=9606 GN=PRELP PE=1 SV=1	Color2 [DarkGray]	1	4		19.4306	17.9369	20.6753	19.1983	22.0766	20.6185
	0.360095	-1.4238	K.NSNLQHIN[+1378.476]FTR.N	HexNAc(2)Hex(6)	N[+1378]	>sp|Q16620|NTRK2_HUMAN BDNF/NT-3 growth factors receptor OS=Homo sapiens OX=9606 GN=NTRK2 PE=1 SV=1	Color2 [DarkGray]	1	4		18.3506	20.7099	19.1256	19.1956	23.8053	19.4567
	0.570788	-1.39953	K.NYFHYN[+1362.481]QSYPPTYNVK.D	HexNAc(2)Hex(5)Fuc(1)	N[+1362]	>sp|P38571|LICH_HUMAN Lysosomal acid lipase/cholesteryl ester hydrolase OS=Homo sapiens OX=9606 GN=LIPA PE=1 SV=2	Color2 [DarkGray]	1	4		19.5422	18.0675	21.7851	21.3311	20.9079	21.3544
+	2.2981	3.64056	K.PGN[+1702.581]LSRPPPVVVPHQPR.L	HexNAc(2)Hex(8)	N[+1703]	>sp|Q9BU23|LMF2_HUMAN Lipase maturation factor 2 OS=Homo sapiens OX=9606 GN=LMF2 PE=1 SV=2	Color2 [DarkGray]	1	4		23.684	22.7973	24.7011	20.578	19.4109	20.2718
	0.779863	3.11944	K.PGN[+1864.634]LSRPPPVVVPHQPR.L	HexNAc(2)Hex(9)	N[+1865]	>sp|Q9BU23|LMF2_HUMAN Lipase maturation factor 2 OS=Homo sapiens OX=9606 GN=LMF2 PE=1 SV=2	Color2 [DarkGray]	1	4		23.9625	23.3875	24.1551	23.2526	21.7311	17.163
	1.44293	2.81556	K.PLGLAN[+1702.581]DTDHYFLR.Y	HexNAc(2)Hex(8)	N[+1703]	>sp|Q969N2|PIGT_HUMAN GPI transamidase component PIG-T OS=Homo sapiens OX=9606 GN=PIGT PE=1 SV=1	Color2 [DarkGray]	1	4		24.3628	22.868	24.513	22.3205	21.2103	19.7662
	0.679007	-2.23317	K.PLQN[+2204.772]FTLC[+57.021]FR.A	HexNAc(4)Hex(5)NeuAc(2)	C[+57], N[+2205]	>sp|P02743|SAMP_HUMAN Serum amyloid P-component OS=Homo sapiens OX=9606 GN=APCS PE=1 SV=2	Color2 [DarkGray]	1	4		19.5747	20.2495	20.3956	24.8431	22.3352	19.741
	0.173314	-0.330624	K.PLTAQQTTKLDAPTNLQFVN[+2256.851]ETDSTVLVR.W	HexNAc(8)Hex(3)Fuc(1)	N[+2257]	>sp|P02751|FINC_HUMAN Fibronectin OS=Homo sapiens OX=9606 GN=FN1 PE=1 SV=5	Color2 [DarkGray]	1	4		19.5561	19.7535	17.8837	20.2197	18.9664	18.9991
	0.639139	1.92685	K.PREEQFN[+1444.534]STFR.V	HexNAc(4)Hex(3)Fuc(1)	N[+1445]	>sp|P01859|IGHG2_HUMAN Immunoglobulin heavy constant gamma 2 OS=Homo sapiens OX=9606 GN=IGHG2 PE=1 SV=2	Color2 [DarkGray]	1	4		19.251	23.2494	19.1328	18.8723	18.5903	18.3901
	0.355108	1.92757	K.PREEQYN[+1444.534]STYR.V	HexNAc(4)Hex(3)Fuc(1)	N[+1445]	>sp|P0DOX5|IGG1_HUMAN Immunoglobulin gamma-1 heavy chain OS=Homo sapiens OX=9606 PE=1 SV=2	Color2 [DarkGray]	1	4		20.4859	18.6841	26.066	19.1722	20.5587	19.7225
	0.276511	1.40452	K.PREEQYN[+1606.587]STYR.V	HexNAc(4)Hex(4)Fuc(1)	N[+1607]	>sp|P0DOX5|IGG1_HUMAN Immunoglobulin gamma-1 heavy chain OS=Homo sapiens OX=9606 PE=1 SV=2	Color2 [DarkGray]	1	4		19.0037	19.4418	24.9392	21.0366	19.5717	18.5628
+	3.45783	2.91024	K.PTHVN[+1378.476]VSVVMAEVDGTC[+57.021]Y.-	HexNAc(2)Hex(6)	C[+57], N[+1378]	>sp|P01876|IGHA1_HUMAN Immunoglobulin heavy constant alpha 1 OS=Homo sapiens OX=9606 GN=IGHA1 PE=1 SV=2	Color2 [DarkGray]	1	4		22.3189	22.615	21.767	19.3776	19.4024	19.1902
	2.25441	1.64295	K.PTHVN[+1540.529]VSVVMAEVDGTC[+57.021]Y.-	HexNAc(2)Hex(7)	C[+57], N[+1541]	>sp|P01876|IGHA1_HUMAN Immunoglobulin heavy constant alpha 1 OS=Homo sapiens OX=9606 GN=IGHA1 PE=1 SV=2	Color2 [DarkGray]	1	4		20.7007	20.6216	21.156	18.9566	19.687	18.9058
	0.349521	1.17962	K.PTHVN[+1809.666]VSVVMAEVDGTC[+57.021]Y.-	HexNAc(5)Hex(4)Fuc(1)	C[+57], N[+1810]	>sp|P01876|IGHA1_HUMAN Immunoglobulin heavy constant alpha 1 OS=Homo sapiens OX=9606 GN=IGHA1 PE=1 SV=2	Color2 [DarkGray]	1	4		19.2008	22.4468	23.5068	21.5711	20.2558	19.7887
	0.347306	0.740328	K.PTHVN[+2100.761]VSVVMAEVDGTC[+57.021]Y.-	HexNAc(5)Hex(4)Fuc(1)NeuAc(1)	C[+57], N[+2101]	>sp|P01876|IGHA1_HUMAN Immunoglobulin heavy constant alpha 1 OS=Homo sapiens OX=9606 GN=IGHA1 PE=1 SV=2	Color2 [DarkGray]	1	4		19.8909	18.5557	21.5278	18.8922	19.2517	19.6096
	0.777447	3.34392	K.PTHVN[+2262.814]VSVVMAEVDGTC[+57.021]Y.-	HexNAc(5)Hex(5)Fuc(1)NeuAc(1)	C[+57], N[+2263]	>sp|P01876|IGHA1_HUMAN Immunoglobulin heavy constant alpha 1 OS=Homo sapiens OX=9606 GN=IGHA1 PE=1 SV=2	Color2 [DarkGray]	1	4		18.2887	22.5884	24.8053	17.6453	18.5568	19.4486
	1.01078	2.0237	K.PTHVN[+2350.830]VSVVMAEVDGTC[+57.021]Y.-	HexNAc(4)Hex(5)Fuc(1)NeuAc(2)	C[+57], N[+2351]	>sp|P01876|IGHA1_HUMAN Immunoglobulin heavy constant alpha 1 OS=Homo sapiens OX=9606 GN=IGHA1 PE=1 SV=2	Color2 [DarkGray]	1	4		22.2952	20.158	22.7032	19.3376	19.047	20.7007
	0.424566	0.989376	K.PTHVN[+2553.910]VSVVMAEVDGTC[+57.021].Y	HexNAc(5)Hex(5)Fuc(1)NeuAc(2)	C[+57], N[+2554]	>sp|P01876|IGHA1_HUMAN Immunoglobulin heavy constant alpha 1 OS=Homo sapiens OX=9606 GN=IGHA1 PE=1 SV=2	Color2 [DarkGray]	1	4		19.2106	18.435	21.6674	19.042	18.9157	18.3871
	0.859369	0.997768	K.PTHVN[+2553.910]VSVVMAEVDGTC[+57.021]Y.-	HexNAc(5)Hex(5)Fuc(1)NeuAc(2)	C[+57], N[+2554]	>sp|P01876|IGHA1_HUMAN Immunoglobulin heavy constant alpha 1 OS=Homo sapiens OX=9606 GN=IGHA1 PE=1 SV=2	Color2 [DarkGray]	1	4		18.6422	19.881	20.3494	18.6551	18.3032	18.921
	0.52351	-1.84361	K.PTVTTVYANN[+2141.788]GSVLQGSSVASVYDGK.L	HexNAc(6)Hex(3)Fuc(1)NeuAc(1)	N[+2142]	>sp|Q15165|PON2_HUMAN Serum paraoxonase/arylesterase 2 OS=Homo sapiens OX=9606 GN=PON2 PE=1 SV=4	Color2 [DarkGray]	1	4		18.9378	21.6566	17.9258	22.4195	19.1999	22.4316
+	3.49878	5.39189	K.PVAN[+1403.507]VTC[+57.021]VNK.H	HexNAc(3)Hex(4)Fuc(1)	C[+57], N[+1404]	>sp|Q9HC84|MUC5B_HUMAN Mucin-5B OS=Homo sapiens OX=9606 GN=MUC5B PE=1 SV=3	Color2 [DarkGray]	1	4		24.5404	24.4132	25.1015	19.5083	18.4921	19.8791
+	4.06588	6.2401	K.PVAN[+1565.560]VTC[+57.021]VNK.H	HexNAc(3)Hex(5)Fuc(1)	C[+57], N[+1566]	>sp|Q9HC84|MUC5B_HUMAN Mucin-5B OS=Homo sapiens OX=9606 GN=MUC5B PE=1 SV=3	Color2 [DarkGray]	1	4		25.145	25.4486	25.5035	18.5953	18.9441	19.8374
+	2.3945	5.59155	K.PVAN[+1581.555]VTC[+57.021]VNK.H	HexNAc(3)Hex(6)	C[+57], N[+1582]	>sp|Q9HC84|MUC5B_HUMAN Mucin-5B OS=Homo sapiens OX=9606 GN=MUC5B PE=1 SV=3	Color2 [DarkGray]	1	4		24.0647	26.3423	26.0324	20.88	18.763	20.0218
+	5.15969	7.7311	K.PVAN[+1694.603]VTC[+57.021]VNK.H	HexNAc(3)Hex(4)Fuc(1)NeuAc(1)	C[+57], N[+1695]	>sp|Q9HC84|MUC5B_HUMAN Mucin-5B OS=Homo sapiens OX=9606 GN=MUC5B PE=1 SV=3	Color2 [DarkGray]	1	4		27.4796	27.263	27.8924	19.5152	19.8079	20.1186
+	4.02341	6.34302	K.PVAN[+1702.581]VTC[+57.021]VNK.H	HexNAc(2)Hex(8)	C[+57], N[+1703]	>sp|Q9HC84|MUC5B_HUMAN Mucin-5B OS=Homo sapiens OX=9606 GN=MUC5B PE=1 SV=3	Color2 [DarkGray]	1	4		25.58	25.2465	25.934	19.0059	19.9332	18.7923
	0.912233	3.01557	K.PVAN[+1710.598]VTC[+57.021]VNK.H	HexNAc(3)Hex(5)NeuAc(1)	C[+57], N[+1711]	>sp|Q9HC84|MUC5B_HUMAN Mucin-5B OS=Homo sapiens OX=9606 GN=MUC5B PE=1 SV=3	Color2 [DarkGray]	1	4		22.8304	18.5095	23.3582	18.3666	18.4338	18.8509
+	2.61421	4.32552	K.PVAN[+1727.613]VTC[+57.021]VNK.H	HexNAc(3)Hex(6)Fuc(1)	C[+57], N[+1728]	>sp|Q9HC84|MUC5B_HUMAN Mucin-5B OS=Homo sapiens OX=9606 GN=MUC5B PE=1 SV=3	Color2 [DarkGray]	1	4		23.8719	24.1319	24.1868	20.9856	18.9919	19.2365
+	3.9739	7.374	K.PVAN[+1768.640]VTC[+57.021]VNK.H	HexNAc(4)Hex(5)Fuc(1)	C[+57], N[+1769]	>sp|Q9HC84|MUC5B_HUMAN Mucin-5B OS=Homo sapiens OX=9606 GN=MUC5B PE=1 SV=3	Color2 [DarkGray]	1	4		26.1324	26.7319	26.6724	19.0936	18.3955	19.9257
	0.888789	3.60321	K.PVAN[+1864.634]VTC[+57.021]VNK.H	HexNAc(2)Hex(9)	C[+57], N[+1865]	>sp|Q9HC84|MUC5B_HUMAN Mucin-5B OS=Homo sapiens OX=9606 GN=MUC5B PE=1 SV=3	Color2 [DarkGray]	1	4		23.9261	18.4196	24.0598	19.1045	17.9216	18.5698
+	2.30434	5.3005	K.PVAN[+1872.651]VTC[+57.021]VNK.H	HexNAc(3)Hex(6)NeuAc(1)	C[+57], N[+1873]	>sp|Q9HC84|MUC5B_HUMAN Mucin-5B OS=Homo sapiens OX=9606 GN=MUC5B PE=1 SV=3	Color2 [DarkGray]	1	4		25.5832	25.3979	25.8243	21.9741	20.1958	18.734
+	3.49477	7.15976	K.PVAN[+2018.708]VTC[+57.021]VNK.H	HexNAc(3)Hex(6)Fuc(1)NeuAc(1)	C[+57], N[+2019]	>sp|Q9HC84|MUC5B_HUMAN Mucin-5B OS=Homo sapiens OX=9606 GN=MUC5B PE=1 SV=3	Color2 [DarkGray]	1	4		26.3065	25.8423	26.6713	18.0142	19.3948	19.9318
+	5.58744	9.77655	K.PVAN[+2059.735]VTC[+57.021]VNK.H	HexNAc(4)Hex(5)Fuc(1)NeuAc(1)	C[+57], N[+2060]	>sp|Q9HC84|MUC5B_HUMAN Mucin-5B OS=Homo sapiens OX=9606 GN=MUC5B PE=1 SV=3	Color2 [DarkGray]	1	4		29.1594	28.704	29.3408	19.0241	19.5907	19.2597
	0.770476	2.473	K.PVAN[+2350.830]VTC[+57.021]VNK.H	HexNAc(4)Hex(5)Fuc(1)NeuAc(2)	C[+57], N[+2351]	>sp|Q9HC84|MUC5B_HUMAN Mucin-5B OS=Homo sapiens OX=9606 GN=MUC5B PE=1 SV=3	Color2 [DarkGray]	1	4		24.0661	21.8833	19.0124	18.765	19.363	19.4148
	0.451549	1.79103	K.PVAN[+2424.867]VTC[+57.021]VNK.H	HexNAc(5)Hex(6)Fuc(1)NeuAc(1)	C[+57], N[+2425]	>sp|Q9HC84|MUC5B_HUMAN Mucin-5B OS=Homo sapiens OX=9606 GN=MUC5B PE=1 SV=3	Color2 [DarkGray]	1	4		18.7903	22.3726	24.1216	19.7129	21.2468	18.9517
	0.20029	0.397394	K.QAFDQILQDRN[+1378.476]HSSYLGYSVAAISTGESTHFVAGAPR.A	HexNAc(2)Hex(6)	N[+1378]	>sp|P17301|ITA2_HUMAN Integrin alpha-2 OS=Homo sapiens OX=9606 GN=ITGA2 PE=1 SV=1	Color2 [DarkGray]	1	4		19.2588	19.8099	20.5488	18.1624	19.9291	20.3338
	0.666703	3.19955	K.QAFDQILQDRN[+1540.529]HSSYLGYSVAAISTGESTHFVAGAPR.A	HexNAc(2)Hex(7)	N[+1541]	>sp|P17301|ITA2_HUMAN Integrin alpha-2 OS=Homo sapiens OX=9606 GN=ITGA2 PE=1 SV=1	Color2 [DarkGray]	1	4		19.7612	21.2987	26.7848	20.2674	18.8169	19.1618
	0.243545	0.588811	K.QDN[+1702.581]ETGIYYETWNVK.A	HexNAc(2)Hex(8)	N[+1703]	>sp|O75503|CLN5_HUMAN Ceroid-lipofuscinosis neuronal protein 5 OS=Homo sapiens OX=9606 GN=CLN5 PE=1 SV=2	Color2 [DarkGray]	1	4		20.5571	21.0277	18.2092	20.0859	19.1707	18.7709
+	2.30693	5.78172	K.QDN[+1864.634]ETGIYYETWNVK.A	HexNAc(2)Hex(9)	N[+1865]	>sp|O75503|CLN5_HUMAN Ceroid-lipofuscinosis neuronal protein 5 OS=Homo sapiens OX=9606 GN=CLN5 PE=1 SV=2	Color2 [DarkGray]	1	4		24.8111	24.9196	27.8661	20.1235	20.4776	19.6506
	0.236753	-0.45344	K.QIGLYPVLVIDSSGYVNPN[+1694.603]YTGR.I	HexNAc(3)Hex(4)Fuc(1)NeuAc(1)	N[+1695]	>sp|P01833|PIGR_HUMAN Polymeric immunoglobulin receptor OS=Homo sapiens OX=9606 GN=PIGR PE=1 SV=4	Color2 [DarkGray]	1	4		21.7697	19.9358	19.3259	20.8397	20.4863	21.0657
	1.36025	2.49983	K.QIGLYPVLVIDSSGYVNPN[+1702.581]YTGR.I	HexNAc(2)Hex(8)	N[+1703]	>sp|P01833|PIGR_HUMAN Polymeric immunoglobulin receptor OS=Homo sapiens OX=9606 GN=PIGR PE=1 SV=4	Color2 [DarkGray]	1	4		21.9569	23.3956	20.5386	19.8928	19.4322	19.0665
	0.41572	0.715267	K.QIGLYPVLVIDSSGYVNPN[+1710.598]YTGR.I	HexNAc(3)Hex(5)NeuAc(1)	N[+1711]	>sp|P01833|PIGR_HUMAN Polymeric immunoglobulin receptor OS=Homo sapiens OX=9606 GN=PIGR PE=1 SV=4	Color2 [DarkGray]	1	4		19.4087	19.9193	21.5807	19.1722	20.2304	19.3604
+	3.7952	4.53834	K.QIGLYPVLVIDSSGYVNPN[+1768.640]YTGR.I	HexNAc(4)Hex(5)Fuc(1)	N[+1769]	>sp|P01833|PIGR_HUMAN Polymeric immunoglobulin receptor OS=Homo sapiens OX=9606 GN=PIGR PE=1 SV=4	Color2 [DarkGray]	1	4		23.6382	23.6622	24.0389	18.6365	19.548	19.5397
	1.37865	1.76072	K.QIGLYPVLVIDSSGYVNPN[+1872.651]YTGR.I	HexNAc(3)Hex(6)NeuAc(1)	N[+1873]	>sp|P01833|PIGR_HUMAN Polymeric immunoglobulin receptor OS=Homo sapiens OX=9606 GN=PIGR PE=1 SV=4	Color2 [DarkGray]	1	4		20.9808	20.9446	21.5529	18.5433	20.4595	19.1933
	1.63783	-1.13559	K.QIGLYPVLVIDSSGYVNPN[+1913.677]YTGR.I	HexNAc(4)Hex(5)NeuAc(1)	N[+1914]	>sp|P01833|PIGR_HUMAN Polymeric immunoglobulin receptor OS=Homo sapiens OX=9606 GN=PIGR PE=1 SV=4	Color2 [DarkGray]	1	4		18.4887	19.4506	19.0781	19.9766	20.4362	20.0115
	0.890176	1.33701	K.QIGLYPVLVIDSSGYVNPN[+1930.692]YTGR.I	HexNAc(4)Hex(6)Fuc(1)	N[+1931]	>sp|P01833|PIGR_HUMAN Polymeric immunoglobulin receptor OS=Homo sapiens OX=9606 GN=PIGR PE=1 SV=4	Color2 [DarkGray]	1	4		20.3278	20.8981	21.2163	18.2115	20.3676	19.852
+	3.3416	7.15828	K.QIGLYPVLVIDSSGYVNPN[+2059.735]YTGR.I	HexNAc(4)Hex(5)Fuc(1)NeuAc(1)	N[+2060]	>sp|P01833|PIGR_HUMAN Polymeric immunoglobulin receptor OS=Homo sapiens OX=9606 GN=PIGR PE=1 SV=4	Color2 [DarkGray]	1	4		27.0115	27.2811	28.1957	19.1916	20.8182	21.0037
	0.337702	0.764786	K.QIGLYPVLVIDSSGYVNPN[+2100.761]YTGR.I	HexNAc(5)Hex(4)Fuc(1)NeuAc(1)	N[+2101]	>sp|P01833|PIGR_HUMAN Polymeric immunoglobulin receptor OS=Homo sapiens OX=9606 GN=PIGR PE=1 SV=4	Color2 [DarkGray]	1	4		19.3135	18.5962	21.6398	18.9499	18.87	19.4354
	0.521352	0.385281	K.QIGLYPVLVIDSSGYVNPN[+2116.756]YTGR.I	HexNAc(5)Hex(5)NeuAc(1)	N[+2117]	>sp|P01833|PIGR_HUMAN Polymeric immunoglobulin receptor OS=Homo sapiens OX=9606 GN=PIGR PE=1 SV=4	Color2 [DarkGray]	1	4		19.8654	19.8417	19.7538	19.8405	19.6677	18.7969
+	3.72934	7.14718	K.QIGLYPVLVIDSSGYVNPN[+2204.772]YTGR.I	HexNAc(4)Hex(5)NeuAc(2)	N[+2205]	>sp|P01833|PIGR_HUMAN Polymeric immunoglobulin receptor OS=Homo sapiens OX=9606 GN=PIGR PE=1 SV=4	Color2 [DarkGray]	1	4		27.022	26.3108	27.5453	20.3272	19.0184	20.091
+	2.44485	4.45449	K.QIGLYPVLVIDSSGYVNPN[+2221.788]YTGR.I	HexNAc(4)Hex(6)Fuc(1)NeuAc(1)	N[+2222]	>sp|P01833|PIGR_HUMAN Polymeric immunoglobulin receptor OS=Homo sapiens OX=9606 GN=PIGR PE=1 SV=4	Color2 [DarkGray]	1	4		24.0069	23.3135	23.7176	20.6012	18.7432	18.3302
	0.830517	1.95809	K.QIGLYPVLVIDSSGYVNPN[+2245.799]YTGR.I	HexNAc(5)Hex(4)NeuAc(2)	N[+2246]	>sp|P01833|PIGR_HUMAN Polymeric immunoglobulin receptor OS=Homo sapiens OX=9606 GN=PIGR PE=1 SV=4	Color2 [DarkGray]	1	4		23.5448	20.7148	21.2452	19.8638	21.033	18.7337
+	5.27021	12.0812	K.QIGLYPVLVIDSSGYVNPN[+2350.830]YTGR.I	HexNAc(4)Hex(5)Fuc(1)NeuAc(2)	N[+2351]	>sp|P01833|PIGR_HUMAN Polymeric immunoglobulin receptor OS=Homo sapiens OX=9606 GN=PIGR PE=1 SV=4	Color2 [DarkGray]	1	4		30.5763	31.1883	31.83	19.0688	18.9973	19.285
	0.952089	4.18246	K.QIGLYPVLVIDSSGYVNPN[+2391.857]YTGR.I	HexNAc(5)Hex(4)Fuc(1)NeuAc(2)	N[+2392]	>sp|P01833|PIGR_HUMAN Polymeric immunoglobulin receptor OS=Homo sapiens OX=9606 GN=PIGR PE=1 SV=4	Color2 [DarkGray]	1	4		26.6675	20.1991	25.7245	20.2508	20.5515	19.2415
+	3.15036	3.40743	K.QIGLYPVLVIDSSGYVNPN[+2424.867]YTGR.I	HexNAc(5)Hex(6)Fuc(1)NeuAc(1)	N[+2425]	>sp|P01833|PIGR_HUMAN Polymeric immunoglobulin receptor OS=Homo sapiens OX=9606 GN=PIGR PE=1 SV=4	Color2 [DarkGray]	1	4		22.2271	22.5695	22.6597	19.6443	18.479	19.1108
	0.653241	2.29987	K.QIGLYPVLVIDSSGYVNPN[+2569.905]YTGR.I	HexNAc(5)Hex(6)NeuAc(2)	N[+2570]	>sp|P01833|PIGR_HUMAN Polymeric immunoglobulin receptor OS=Homo sapiens OX=9606 GN=PIGR PE=1 SV=4	Color2 [DarkGray]	1	4		18.2281	22.3561	22.5642	20.0248	17.4729	18.7512
	0.74847	2.79465	K.QIGLYPVLVIDSSGYVNPN[+2715.963]YTGR.I	HexNAc(5)Hex(6)Fuc(1)NeuAc(2)	N[+2716]	>sp|P01833|PIGR_HUMAN Polymeric immunoglobulin receptor OS=Homo sapiens OX=9606 GN=PIGR PE=1 SV=4	Color2 [DarkGray]	1	4		23.5355	18.914	23.7569	17.9781	20.2105	19.6339
+	2.00369	2.99796	K.QIGLYPVLVIDSSGYVNPN[+2717.978]YTGR.I	HexNAc(7)Hex(8)	N[+2718]	>sp|P01833|PIGR_HUMAN Polymeric immunoglobulin receptor OS=Homo sapiens OX=9606 GN=PIGR PE=1 SV=4	Color2 [DarkGray]	1	4		23.994	22.3124	22.25	19.7097	19.4055	20.4472
+	2.84976	5.01291	K.QIGLYPVLVIDSSGYVNPN[+2861.000]YTGR.I	HexNAc(5)Hex(6)NeuAc(3)	N[+2861]	>sp|P01833|PIGR_HUMAN Polymeric immunoglobulin receptor OS=Homo sapiens OX=9606 GN=PIGR PE=1 SV=4	Color2 [DarkGray]	1	4		24.4068	24.6408	24.1967	18.1686	20.1888	19.8483
	0.138495	0.379459	K.QIGLYPVLVIDSSGYVNPN[+2878.015]YTGR.I	HexNAc(5)Hex(7)Fuc(1)NeuAc(2)	N[+2878]	>sp|P01833|PIGR_HUMAN Polymeric immunoglobulin receptor OS=Homo sapiens OX=9606 GN=PIGR PE=1 SV=4	Color2 [DarkGray]	1	4		18.4122	21.5621	20.0433	20.4309	18.8913	19.557
	0.623991	2.01077	K.QIGLYPVLVIDSSGYVNPN[+3007.058]YTGR.I	HexNAc(5)Hex(6)Fuc(1)NeuAc(3)	N[+3007]	>sp|P01833|PIGR_HUMAN Polymeric immunoglobulin receptor OS=Homo sapiens OX=9606 GN=PIGR PE=1 SV=4	Color2 [DarkGray]	1	4		18.8251	19.7178	23.4933	18.8839	18.2015	18.9185
+	4.93405	3.2152	K.QIGLYPVLVIDSSGYVNPN[+3009.074]YTGR.I	HexNAc(7)Hex(8)NeuAc(1)	N[+3009]	>sp|P01833|PIGR_HUMAN Polymeric immunoglobulin receptor OS=Homo sapiens OX=9606 GN=PIGR PE=1 SV=4	Color2 [DarkGray]	1	4		23.0727	23.1778	22.8429	19.9073	19.6819	19.8586
	0.631396	-1.25401	K.QLVLN[+2350.830]LTGNTLC[+57.021]AGGASDEK.L	HexNAc(4)Hex(5)Fuc(1)NeuAc(2)	C[+57], N[+2351]	>sp|O00592|PODXL_HUMAN Podocalyxin OS=Homo sapiens OX=9606 GN=PODXL PE=1 SV=2	Color2 [DarkGray]	1	4		19.5593	18.4742	19.15	21.9769	19.658	19.3105
	1.00706	2.01258	K.QN[+1378.476]LTVTDR.V	HexNAc(2)Hex(6)	N[+1378]	>sp|P12111|CO6A3_HUMAN Collagen alpha-3(VI) chain OS=Homo sapiens OX=9606 GN=COL6A3 PE=1 SV=5	Color2 [DarkGray]	1	4		22.5126	21.9971	19.6147	18.7914	19.5878	19.7075
	1.30781	2.70084	K.QN[+1540.529]LTVTDR.V	HexNAc(2)Hex(7)	N[+1541]	>sp|P12111|CO6A3_HUMAN Collagen alpha-3(VI) chain OS=Homo sapiens OX=9606 GN=COL6A3 PE=1 SV=5	Color2 [DarkGray]	1	4		22.6639	22.8173	19.8488	19.1775	18.9436	19.1065
	0.766229	2.42239	K.QN[+1702.581]LTVTDR.V	HexNAc(2)Hex(8)	N[+1703]	>sp|P12111|CO6A3_HUMAN Collagen alpha-3(VI) chain OS=Homo sapiens OX=9606 GN=COL6A3 PE=1 SV=5	Color2 [DarkGray]	1	4		22.8901	19.5232	22.8903	20.1579	17.4975	20.381
	0.31871	1.86813	K.QN[+2059.735]LTVTDR.V	HexNAc(4)Hex(5)Fuc(1)NeuAc(1)	N[+2060]	>sp|P12111|CO6A3_HUMAN Collagen alpha-3(VI) chain OS=Homo sapiens OX=9606 GN=COL6A3 PE=1 SV=5	Color2 [DarkGray]	1	4		19.4193	25.3158	24.7489	24.0714	20.8678	18.9403
	0.221718	0.367017	K.QNNGAFN[+1702.581]ETLFR.N	HexNAc(2)Hex(8)	N[+1703]	>sp|P02786|TFR1_HUMAN Transferrin receptor protein 1 OS=Homo sapiens OX=9606 GN=TFRC PE=1 SV=2	Color2 [DarkGray]	1	4		20.2005	19.9791	20.2559	20.2966	20.5328	18.5051
	0.247861	0.576894	K.QSN[+1702.581]GSIVVVSSLAGK.V	HexNAc(2)Hex(8)	N[+1703]	>sp|P28845|DHI1_HUMAN Corticosteroid 11-beta-dehydrogenase isozyme 1 OS=Homo sapiens OX=9606 GN=HSD11B1 PE=1 SV=3	Color2 [DarkGray]	1	4		21.0196	20.0252	18.7948	19.4961	18.1698	20.4429
	0.0560702	0.175426	K.QSVPAHFVALN[+1216.423]GSK.L	HexNAc(2)Hex(5)	N[+1216]	>sp|P06681|CO2_HUMAN Complement C2 OS=Homo sapiens OX=9606 GN=C2 PE=1 SV=2	Color2 [DarkGray]	1	4		21.9869	18.7185	18.883	19.5789	19.422	20.0612
	1.34505	3.93839	K.QSVPAHFVALN[+1378.476]GSK.L	HexNAc(2)Hex(6)	N[+1378]	>sp|P06681|CO2_HUMAN Complement C2 OS=Homo sapiens OX=9606 GN=C2 PE=1 SV=2	Color2 [DarkGray]	1	4		25.1502	22.5062	23.7101	22.0769	18.3444	19.1301
	0.653917	2.54307	K.QSVPAHFVALN[+1540.529]GSK.L	HexNAc(2)Hex(7)	N[+1541]	>sp|P06681|CO2_HUMAN Complement C2 OS=Homo sapiens OX=9606 GN=C2 PE=1 SV=2	Color2 [DarkGray]	1	4		24.0794	18.282	22.1704	18.9389	18.2357	19.7281
	0.807898	-2.90257	K.QTQVGIVQYGEN[+1768.640]VTHEFNLNK.Y	HexNAc(4)Hex(5)Fuc(1)	N[+1769]	>sp|P56199|ITA1_HUMAN Integrin alpha-1 OS=Homo sapiens OX=9606 GN=ITGA1 PE=1 SV=2	Color2 [DarkGray]	1	4		19.0027	18.9693	19.6075	24.6302	22.6557	19.0014
	0.208272	-0.830705	K.QTQVGIVQYGEN[+2059.735]VTHEFNLNK.Y	HexNAc(4)Hex(5)Fuc(1)NeuAc(1)	N[+2060]	>sp|P56199|ITA1_HUMAN Integrin alpha-1 OS=Homo sapiens OX=9606 GN=ITGA1 PE=1 SV=2	Color2 [DarkGray]	1	4		19.6431	19.7808	19.2827	18.1793	23.3499	19.6696
	0.820227	-3.12423	K.QTQVGIVQYGEN[+2133.772]VTHEFNLNK.Y	HexNAc(5)Hex(6)Fuc(1)	N[+2134]	>sp|P56199|ITA1_HUMAN Integrin alpha-1 OS=Homo sapiens OX=9606 GN=ITGA1 PE=1 SV=2	Color2 [DarkGray]	1	4		18.7839	18.8141	18.6724	18.4084	23.0813	24.1533
	0.249106	-0.967699	K.QTQVGIVQYGEN[+2141.788]VTHEFNLNK.Y	HexNAc(6)Hex(3)Fuc(1)NeuAc(1)	N[+2142]	>sp|P56199|ITA1_HUMAN Integrin alpha-1 OS=Homo sapiens OX=9606 GN=ITGA1 PE=1 SV=2	Color2 [DarkGray]	1	4		18.4656	20.4826	21.2694	18.471	22.0813	22.5683
	0.0569755	0.196397	K.QTQVGIVQYGEN[+2350.830]VTHEFNLNK.Y	HexNAc(4)Hex(5)Fuc(1)NeuAc(2)	N[+2351]	>sp|P56199|ITA1_HUMAN Integrin alpha-1 OS=Homo sapiens OX=9606 GN=ITGA1 PE=1 SV=2	Color2 [DarkGray]	1	4		19.8616	18.5294	22.5283	20.4419	20.1136	19.7747
	1.81114	-2.41261	K.QVFPGLNYC[+57.021]TSGAYSN[+1897.682]ASSTDSASYYPLTGDTR.L	HexNAc(4)Hex(4)Fuc(1)NeuAc(1)	C[+57], N[+1898]	>sp|P04114|APOB_HUMAN Apolipoprotein B-100 OS=Homo sapiens OX=9606 GN=APOB PE=1 SV=2	Color2 [DarkGray]	1	4		20.23	19.1599	18.3105	21.4996	21.3697	22.0688
	1.90582	-1.26898	K.QVFPGLNYC[+57.021]TSGAYSN[+1913.677]ASSTDSASYYPLTGDTR.L	HexNAc(4)Hex(5)NeuAc(1)	C[+57], N[+1914]	>sp|P04114|APOB_HUMAN Apolipoprotein B-100 OS=Homo sapiens OX=9606 GN=APOB PE=1 SV=2	Color2 [DarkGray]	1	4		20.4617	21.1327	20.7771	22.3295	21.6225	22.2264
+	3.22886	-8.24481	K.QVIQN[+1768.640]VTHK.D	HexNAc(4)Hex(5)Fuc(1)	N[+1769]	>sp|Q7Z7G0|TARSH_HUMAN Target of Nesh-SH3 OS=Homo sapiens OX=9606 GN=ABI3BP PE=1 SV=1	Color2 [DarkGray]	1	4		20.2929	18.3311	20.4332	28.8547	27.2034	27.7336
	1.31901	4.41015	K.QVNVPNN[+1378.476]VTSSPTSNPVTTTKPVTTTK.P	HexNAc(2)Hex(6)	N[+1378]	>sp|P12111|CO6A3_HUMAN Collagen alpha-3(VI) chain OS=Homo sapiens OX=9606 GN=COL6A3 PE=1 SV=5	Color2 [DarkGray]	1	4		21.723	26.9136	23.0591	19.7711	19.5159	19.1783
	0.298877	0.628388	K.QVNVPNN[+1702.581]VTSSPTSNPVTTTKPVTTTK.P	HexNAc(2)Hex(8)	N[+1703]	>sp|P12111|CO6A3_HUMAN Collagen alpha-3(VI) chain OS=Homo sapiens OX=9606 GN=COL6A3 PE=1 SV=5	Color2 [DarkGray]	1	4		18.2903	20.7826	20.5734	18.7758	19.1711	19.8142
	0.364117	-1.82426	K.QYPDIWN[+2059.735]KTGAVK.L	HexNAc(4)Hex(5)Fuc(1)NeuAc(1)	N[+2060]	>sp|Q4ADV7|RIC1_HUMAN Guanine nucleotide exchange factor subunit RIC1 OS=Homo sapiens OX=9606 GN=RIC1 PE=1 SV=2	Color2 [DarkGray]	1	4		19.4826	18.923	19.9877	25.3683	18.6468	19.851
+	3.23123	5.03909	K.REC[+57.021]HFFN[+1216.423]GTER.V	HexNAc(2)Hex(5)	C[+57], N[+1216]	>sp|P01911|DRB1_HUMAN HLA class II histocompatibility antigen, DRB1 beta chain OS=Homo sapiens OX=9606 GN=HLA-DRB1 PE=1 SV=2	Color2 [DarkGray]	1	4		24.5246	25.1407	24.4997	19.8846	18.7962	20.3669
	0.0807428	0.511866	K.REC[+57.021]HFFN[+1378.476]GTER.V	HexNAc(2)Hex(6)	C[+57], N[+1378]	>sp|P01911|DRB1_HUMAN HLA class II histocompatibility antigen, DRB1 beta chain OS=Homo sapiens OX=9606 GN=HLA-DRB1 PE=1 SV=2	Color2 [DarkGray]	1	4		18.4669	24.1791	19.239	18.3083	19.2957	22.7454
	1.02697	3.7248	K.REC[+57.021]HFFN[+1540.529]GTER.V	HexNAc(2)Hex(7)	C[+57], N[+1541]	>sp|P01911|DRB1_HUMAN HLA class II histocompatibility antigen, DRB1 beta chain OS=Homo sapiens OX=9606 GN=HLA-DRB1 PE=1 SV=2	Color2 [DarkGray]	1	4		22.9845	25.3853	19.6087	19.5088	18.4702	18.8252
	0.716997	-1.90056	K.RGPEC[+57.021]SQN[+1913.677]YTTPSGVIK.S	HexNAc(4)Hex(5)NeuAc(1)	C[+57], N[+1914]	>sp|O14786|NRP1_HUMAN Neuropilin-1 OS=Homo sapiens OX=9606 GN=NRP1 PE=1 SV=3	Color2 [DarkGray]	1	4		19.3051	18.0878	19.8057	23.1451	19.621	20.1342
	0.386624	1.40702	K.RHEEGHM[+15.995]LN[+1768.640]C[+57.021]TC[+57.021]FGQGR.G	HexNAc(4)Hex(5)Fuc(1)	C[+57]*2, M[+16], N[+1769]	>sp|P02751|FINC_HUMAN Fibronectin OS=Homo sapiens OX=9606 GN=FN1 PE=1 SV=5	Color2 [DarkGray]	1	4		19.9517	24.2501	19.5231	19.8665	20.2796	19.3577
	0.267626	-0.630878	K.RHEEGHMLN[+1216.423]C[+57.021]TC[+57.021]FGQGR.G	HexNAc(2)Hex(5)	C[+57]*2, N[+1216]	>sp|P02751|FINC_HUMAN Fibronectin OS=Homo sapiens OX=9606 GN=FN1 PE=1 SV=5	Color2 [DarkGray]	1	4		24.5705	24.8304	24.9722	26.8052	25.8208	23.6398
	1.06761	2.70878	K.RHEEGHMLN[+1257.449]C[+57.021]TC[+57.021]FGQGR.G	HexNAc(3)Hex(4)	C[+57]*2, N[+1257]	>sp|P02751|FINC_HUMAN Fibronectin OS=Homo sapiens OX=9606 GN=FN1 PE=1 SV=5	Color2 [DarkGray]	1	4		20.5052	23.9548	22.6618	20.0746	18.41	20.5109
	0.556215	1.85655	K.RHEEGHMLN[+1403.507]C[+57.021]TC[+57.021]FGQGR.G	HexNAc(3)Hex(4)Fuc(1)	C[+57]*2, N[+1404]	>sp|P02751|FINC_HUMAN Fibronectin OS=Homo sapiens OX=9606 GN=FN1 PE=1 SV=5	Color2 [DarkGray]	1	4		18.7087	23.2079	22.8878	19.471	19.4255	20.3382
	0.491812	-0.349772	K.RHEEGHMLN[+1419.502]C[+57.021]TC[+57.021]FGQGR.G	HexNAc(3)Hex(5)	C[+57]*2, N[+1420]	>sp|P02751|FINC_HUMAN Fibronectin OS=Homo sapiens OX=9606 GN=FN1 PE=1 SV=5	Color2 [DarkGray]	1	4		19.7125	18.985	19.0353	19.8487	19.7398	19.1937
	1.06649	-0.501256	K.RHEEGHMLN[+1444.534]C[+57.021]TC[+57.021]FGQGR.G	HexNAc(4)Hex(3)Fuc(1)	C[+57]*2, N[+1445]	>sp|P02751|FINC_HUMAN Fibronectin OS=Homo sapiens OX=9606 GN=FN1 PE=1 SV=5	Color2 [DarkGray]	1	4		19.6484	19.2052	19.1793	19.5273	20.035	19.9743
	1.13223	2.71436	K.RHEEGHMLN[+1581.555]C[+57.021]TC[+57.021]FGQGR.G	HexNAc(3)Hex(6)	C[+57]*2, N[+1582]	>sp|P02751|FINC_HUMAN Fibronectin OS=Homo sapiens OX=9606 GN=FN1 PE=1 SV=5	Color2 [DarkGray]	1	4		18.9144	22.0948	22.155	19.0156	17.8162	18.1893
	0.126564	0.711798	K.RHEEGHMLN[+1606.587]C[+57.021]TC[+57.021]FGQGR.G	HexNAc(4)Hex(4)Fuc(1)	C[+57]*2, N[+1607]	>sp|P02751|FINC_HUMAN Fibronectin OS=Homo sapiens OX=9606 GN=FN1 PE=1 SV=5	Color2 [DarkGray]	1	4		25.8745	26.5528	26.5523	25.5144	29.2118	22.118
	1.22222	1.83174	K.RHEEGHMLN[+1622.582]C[+57.021]TC[+57.021]FGQGR.G	HexNAc(4)Hex(5)	C[+57]*2, N[+1623]	>sp|P02751|FINC_HUMAN Fibronectin OS=Homo sapiens OX=9606 GN=FN1 PE=1 SV=5	Color2 [DarkGray]	1	4		26.4579	26.0978	27.6183	24.0109	25.8558	24.812
	0.0906692	0.171247	K.RHEEGHMLN[+1768.640]C[+57.021]TC[+57.021]FGQGR.G	HexNAc(4)Hex(5)Fuc(1)	C[+57]*2, N[+1769]	>sp|P02751|FINC_HUMAN Fibronectin OS=Homo sapiens OX=9606 GN=FN1 PE=1 SV=5	Color2 [DarkGray]	1	4		29.3172	29.473	29.3778	30.2757	29.4047	27.9737
	0.355551	0.972298	K.RHEEGHMLN[+1809.666]C[+57.021]TC[+57.021]FGQGR.G	HexNAc(5)Hex(4)Fuc(1)	C[+57]*2, N[+1810]	>sp|P02751|FINC_HUMAN Fibronectin OS=Homo sapiens OX=9606 GN=FN1 PE=1 SV=5	Color2 [DarkGray]	1	4		19.577	20.1003	23.1305	20.3674	20.0477	19.4758
+	2.73983	5.41315	K.RHEEGHMLN[+1864.634]C[+57.021]TC[+57.021]FGQGR.G	HexNAc(2)Hex(9)	C[+57]*2, N[+1865]	>sp|P02751|FINC_HUMAN Fibronectin OS=Homo sapiens OX=9606 GN=FN1 PE=1 SV=5	Color2 [DarkGray]	1	4		23.8314	25.637	24.3599	18.4889	18.9269	20.173
	0.33282	1.05736	K.RHEEGHMLN[+1913.677]C[+57.021]TC[+57.021]FGQGR.G	HexNAc(4)Hex(5)NeuAc(1)	C[+57]*2, N[+1914]	>sp|P02751|FINC_HUMAN Fibronectin OS=Homo sapiens OX=9606 GN=FN1 PE=1 SV=5	Color2 [DarkGray]	1	4		26.7812	26.2829	27.6847	27.7579	26.3008	23.5182
	0.214171	-0.681901	K.RHEEGHMLN[+2059.735]C[+57.021]TC[+57.021]FGQGR.G	HexNAc(4)Hex(5)Fuc(1)NeuAc(1)	C[+57]*2, N[+2060]	>sp|P02751|FINC_HUMAN Fibronectin OS=Homo sapiens OX=9606 GN=FN1 PE=1 SV=5	Color2 [DarkGray]	1	4		27.6415	26.1499	28.4317	30.1304	27.418	26.7205
	0.701212	2.07807	K.RHEEGHMLN[+2204.772]C[+57.021]TC[+57.021]FGQGR.G	HexNAc(4)Hex(5)NeuAc(2)	C[+57]*2, N[+2205]	>sp|P02751|FINC_HUMAN Fibronectin OS=Homo sapiens OX=9606 GN=FN1 PE=1 SV=5	Color2 [DarkGray]	1	4		26.0562	26.6838	25.9426	25.7964	25.1387	21.5132
	0.526181	-1.93115	K.RHEEGHMLN[+2350.830]C[+57.021]TC[+57.021]FGQGR.G	HexNAc(4)Hex(5)Fuc(1)NeuAc(2)	C[+57]*2, N[+2351]	>sp|P02751|FINC_HUMAN Fibronectin OS=Homo sapiens OX=9606 GN=FN1 PE=1 SV=5	Color2 [DarkGray]	1	4		19.275	19.2284	19.3911	24.4393	19.3314	19.9172
	0.237324	1.0226	K.RHEEGHMLN[+2553.910]C[+57.021]TC[+57.021]FGQGR.G	HexNAc(5)Hex(5)Fuc(1)NeuAc(2)	C[+57]*2, N[+2554]	>sp|P02751|FINC_HUMAN Fibronectin OS=Homo sapiens OX=9606 GN=FN1 PE=1 SV=5	Color2 [DarkGray]	1	4		20.1871	22.8847	18.1466	20.3383	20.4208	17.3915
+	2.37538	-2.24872	K.RLN[+1216.423]TTGVSAGC[+57.021]TADLLVGR.A	HexNAc(2)Hex(5)	C[+57], N[+1216]	>sp|O15230|LAMA5_HUMAN Laminin subunit alpha-5 OS=Homo sapiens OX=9606 GN=LAMA5 PE=1 SV=8	Color2 [DarkGray]	1	4		18.4218	18.8744	18.8976	21.1482	20.3065	21.4854
	0.317985	0.71651	K.RLN[+1768.640]LTHC[+57.021]QDINEC[+57.021]LTLGLC[+57.021]K.D	HexNAc(4)Hex(5)Fuc(1)	C[+57]*3, N[+1769]	>sp|Q14767|LTBP2_HUMAN Latent-transforming growth factor beta-binding protein 2 OS=Homo sapiens OX=9606 GN=LTBP2 PE=1 SV=3	Color2 [DarkGray]	1	4		21.3787	20.0719	18.2203	18.9938	19.1544	19.3732
	0.0846342	-0.232911	K.RLN[+2059.735]LTHC[+57.021]QDINEC[+57.021]LTLGLC[+57.021]K.D	HexNAc(4)Hex(5)Fuc(1)NeuAc(1)	C[+57]*3, N[+2060]	>sp|Q14767|LTBP2_HUMAN Latent-transforming growth factor beta-binding protein 2 OS=Homo sapiens OX=9606 GN=LTBP2 PE=1 SV=3	Color2 [DarkGray]	1	4		25.6715	25.9166	23.4376	24.4105	26.3411	24.9729
+	2.38241	-3.97999	K.RLN[+2272.846]TTGVSAGC[+57.021]TADLLVGR.A	HexNAc(8)Hex(4)	C[+57], N[+2273]	>sp|O15230|LAMA5_HUMAN Laminin subunit alpha-5 OS=Homo sapiens OX=9606 GN=LAMA5 PE=1 SV=8	Color2 [DarkGray]	1	4		20.1949	19.3979	18.2717	24.0234	22.8087	22.9723
	0.938673	3.50041	K.RNDAGSYEC[+57.021]EIQNPASAN[+1216.423]R.S	HexNAc(2)Hex(5)	C[+57], N[+1216]	>sp|P40199|CEAM6_HUMAN Carcinoembryonic antigen-related cell adhesion molecule 6 OS=Homo sapiens OX=9606 GN=CEACAM6 PE=1 SV=3	Color2 [DarkGray]	1	4		24.2864	19.2152	24.5462	19.5039	18.9106	19.132
+	5.3755	3.93972	K.RNDAGSYEC[+57.021]EIQNPASAN[+892.317]R.S	HexNAc(2)Hex(3)	C[+57], N[+892]	>sp|P40199|CEAM6_HUMAN Carcinoembryonic antigen-related cell adhesion molecule 6 OS=Homo sapiens OX=9606 GN=CEACAM6 PE=1 SV=3	Color2 [DarkGray]	1	4		23.0053	22.9862	23.2657	19.2096	19.2225	19.006
	0.960528	-3.68434	K.RNKNVN[+1768.640]QSTK.R	HexNAc(4)Hex(5)Fuc(1)	N[+1769]	>sp|Q5W0B1|OBI1_HUMAN ORC ubiquitin ligase 1 OS=Homo sapiens OX=9606 GN=OBI1 PE=1 SV=1	Color2 [DarkGray]	1	4		18.6701	19.4917	19.7504	25.6552	19.6488	23.6612
	0.794648	-3.76931	K.RNKNVN[+1850.693]QSTK.R	HexNAc(6)Hex(3)Fuc(1)	N[+1851]	>sp|Q5W0B1|OBI1_HUMAN ORC ubiquitin ligase 1 OS=Homo sapiens OX=9606 GN=OBI1 PE=1 SV=1	Color2 [DarkGray]	1	4		18.7504	19.0323	20.9929	26.1801	19.316	24.5876
	1.01859	-6.18512	K.RNKNVN[+2059.735]QSTK.R	HexNAc(4)Hex(5)Fuc(1)NeuAc(1)	N[+2060]	>sp|Q5W0B1|OBI1_HUMAN ORC ubiquitin ligase 1 OS=Homo sapiens OX=9606 GN=OBI1 PE=1 SV=1	Color2 [DarkGray]	1	4		17.8347	19.9658	19.6998	19.8404	28.5991	27.6161
	0.432104	-2.03336	K.RNKNVN[+2141.788]QSTK.R	HexNAc(6)Hex(3)Fuc(1)NeuAc(1)	N[+2142]	>sp|Q5W0B1|OBI1_HUMAN ORC ubiquitin ligase 1 OS=Homo sapiens OX=9606 GN=OBI1 PE=1 SV=1	Color2 [DarkGray]	1	4		18.5867	19.7648	19.2814	19.3674	25.2114	19.1541
+	2.20368	-6.92556	K.RNKNVN[+2350.830]QSTK.R	HexNAc(4)Hex(5)Fuc(1)NeuAc(2)	N[+2351]	>sp|Q5W0B1|OBI1_HUMAN ORC ubiquitin ligase 1 OS=Homo sapiens OX=9606 GN=OBI1 PE=1 SV=1	Color2 [DarkGray]	1	4		18.6833	20.4668	19.0969	26.1631	24.3551	28.5054
	0.543824	-1.73988	K.RNYIVPILWLN[+3048.084]ETGTIGDEK.A	HexNAc(6)Hex(5)Fuc(1)NeuAc(3)	N[+3048]	>sp|P16671|CD36_HUMAN Platelet glycoprotein 4 OS=Homo sapiens OX=9606 GN=CD36 PE=1 SV=2	Color2 [DarkGray]	1	4		18.5117	20.0143	19.5687	19.7969	19.7294	23.788
	0.406237	0.54789	K.RQSGVN[+1987.714]ATLPEENQPVVFNHVYNIK.L	HexNAc(5)Hex(6)	N[+1988]	>sp|P24821|TENA_HUMAN Tenascin OS=Homo sapiens OX=9606 GN=TNC PE=1 SV=3	Color2 [DarkGray]	1	4		20.2198	20.2418	19.8672	18.9304	19.0781	20.6765
	0.985294	2.37589	K.RSN[+1444.534]YTPITNVPPEVTVLTNSPVELR.E	HexNAc(4)Hex(3)Fuc(1)	N[+1445]	>sp|P01903|DRA_HUMAN HLA class II histocompatibility antigen, DR alpha chain OS=Homo sapiens OX=9606 GN=HLA-DRA PE=1 SV=2	Color2 [DarkGray]	1	4		23.2932	21.8124	22.427	21.5837	18.1045	20.7167
	0.0339668	0.0856628	K.RSN[+1694.603]YTPITNVPPEVTVLTNSPVELR.E	HexNAc(3)Hex(4)Fuc(1)NeuAc(1)	N[+1695]	>sp|P01903|DRA_HUMAN HLA class II histocompatibility antigen, DR alpha chain OS=Homo sapiens OX=9606 GN=HLA-DRA PE=1 SV=2	Color2 [DarkGray]	1	4		24.7182	24.5366	24.5571	25.0895	25.6198	22.8455
	0.505286	0.457301	K.RSN[+1702.581]YTPITNVPPEVTVLTNSPVELR.E	HexNAc(2)Hex(8)	N[+1703]	>sp|P01903|DRA_HUMAN HLA class II histocompatibility antigen, DR alpha chain OS=Homo sapiens OX=9606 GN=HLA-DRA PE=1 SV=2	Color2 [DarkGray]	1	4		19.7454	20.0789	19.8703	18.9924	19.1257	20.2046
	0.578675	1.00968	K.RSN[+1768.640]YTPITNVPPEVTVLTNSPVELR.E	HexNAc(4)Hex(5)Fuc(1)	N[+1769]	>sp|P01903|DRA_HUMAN HLA class II histocompatibility antigen, DR alpha chain OS=Homo sapiens OX=9606 GN=HLA-DRA PE=1 SV=2	Color2 [DarkGray]	1	4		21.9151	22.4112	20.5031	21.2098	19.5509	21.0397
	1.02358	1.52808	K.RSN[+1897.682]YTPITNVPPEVTVLTNSPVELR.E	HexNAc(4)Hex(4)Fuc(1)NeuAc(1)	N[+1898]	>sp|P01903|DRA_HUMAN HLA class II histocompatibility antigen, DR alpha chain OS=Homo sapiens OX=9606 GN=HLA-DRA PE=1 SV=2	Color2 [DarkGray]	1	4		21.6323	21.9042	21.7757	20.9398	20.9385	18.8498
	0.519029	2.06879	K.RSN[+2059.735]YTPITNVPPEVTVLTNSPVELR.E	HexNAc(4)Hex(5)Fuc(1)NeuAc(1)	N[+2060]	>sp|P01903|DRA_HUMAN HLA class II histocompatibility antigen, DR alpha chain OS=Homo sapiens OX=9606 GN=HLA-DRA PE=1 SV=2	Color2 [DarkGray]	1	4		25.1352	25.3886	25.4963	25.2195	24.8089	19.7854
	0.657639	1.13344	K.RSN[+2100.761]YTPITNVPPEVTVLTNSPVELR.E	HexNAc(5)Hex(4)Fuc(1)NeuAc(1)	N[+2101]	>sp|P01903|DRA_HUMAN HLA class II histocompatibility antigen, DR alpha chain OS=Homo sapiens OX=9606 GN=HLA-DRA PE=1 SV=2	Color2 [DarkGray]	1	4		20.6363	20.6974	20.715	18.2497	19.4525	20.9461
	1.94767	1.91588	K.RSN[+2262.814]YTPITNVPPEVTVLTNSPVELR.E	HexNAc(5)Hex(5)Fuc(1)NeuAc(1)	N[+2263]	>sp|P01903|DRA_HUMAN HLA class II histocompatibility antigen, DR alpha chain OS=Homo sapiens OX=9606 GN=HLA-DRA PE=1 SV=2	Color2 [DarkGray]	1	4		23.5525	24.1617	23.942	22.6106	21.257	22.0408
+	3.03878	3.18844	K.RSN[+2350.830]YTPITNVPPEVTVLTNSPVELR.E	HexNAc(4)Hex(5)Fuc(1)NeuAc(2)	N[+2351]	>sp|P01903|DRA_HUMAN HLA class II histocompatibility antigen, DR alpha chain OS=Homo sapiens OX=9606 GN=HLA-DRA PE=1 SV=2	Color2 [DarkGray]	1	4		26.7621	27.1699	26.4722	24.0575	23.7395	23.042
	2.15022	1.35903	K.RSN[+2391.857]YTPITNVPPEVTVLTNSPVELR.E	HexNAc(5)Hex(4)Fuc(1)NeuAc(2)	N[+2392]	>sp|P01903|DRA_HUMAN HLA class II histocompatibility antigen, DR alpha chain OS=Homo sapiens OX=9606 GN=HLA-DRA PE=1 SV=2	Color2 [DarkGray]	1	4		21.904	21.2729	21.4725	19.8126	20.3225	20.4373
	1.50801	1.97483	K.RSN[+2424.867]YTPITNVPPEVTVLTNSPVELR.E	HexNAc(5)Hex(6)Fuc(1)NeuAc(1)	N[+2425]	>sp|P01903|DRA_HUMAN HLA class II histocompatibility antigen, DR alpha chain OS=Homo sapiens OX=9606 GN=HLA-DRA PE=1 SV=2	Color2 [DarkGray]	1	4		24.7014	24.8806	25.6681	23.8604	23.3742	22.091
	0.423368	0.838457	K.RSN[+2553.910]YTPITNVPPEVTVLTNSPVELR.E	HexNAc(5)Hex(5)Fuc(1)NeuAc(2)	N[+2554]	>sp|P01903|DRA_HUMAN HLA class II histocompatibility antigen, DR alpha chain OS=Homo sapiens OX=9606 GN=HLA-DRA PE=1 SV=2	Color2 [DarkGray]	1	4		20.6907	19.9644	20.9422	18.1232	20.2954	20.6634
+	2.42732	5.11159	K.RSN[+2715.963]YTPITNVPPEVTVLTNSPVELR.E	HexNAc(5)Hex(6)Fuc(1)NeuAc(2)	N[+2716]	>sp|P01903|DRA_HUMAN HLA class II histocompatibility antigen, DR alpha chain OS=Homo sapiens OX=9606 GN=HLA-DRA PE=1 SV=2	Color2 [DarkGray]	1	4		27.0118	27.3665	28.4039	23.9052	22.0739	21.4685
	0.69621	2.53171	K.RSN[+2789.999]YTPITNVPPEVTVLTNSPVELR.E	HexNAc(6)Hex(7)Fuc(1)NeuAc(1)	N[+2790]	>sp|P01903|DRA_HUMAN HLA class II histocompatibility antigen, DR alpha chain OS=Homo sapiens OX=9606 GN=HLA-DRA PE=1 SV=2	Color2 [DarkGray]	1	4		22.4164	19.573	23.8436	17.9973	18.703	21.5376
	0.653528	1.7384	K.RSN[+2919.042]YTPITNVPPEVTVLTNSPVELR.E	HexNAc(6)Hex(6)Fuc(1)NeuAc(2)	N[+2919]	>sp|P01903|DRA_HUMAN HLA class II histocompatibility antigen, DR alpha chain OS=Homo sapiens OX=9606 GN=HLA-DRA PE=1 SV=2	Color2 [DarkGray]	1	4		18.7333	22.2867	22.0467	19.352	19.8795	18.62
+	3.83702	6.3998	K.RSN[+3007.058]YTPITNVPPEVTVLTNSPVELR.E	HexNAc(5)Hex(6)Fuc(1)NeuAc(3)	N[+3007]	>sp|P01903|DRA_HUMAN HLA class II histocompatibility antigen, DR alpha chain OS=Homo sapiens OX=9606 GN=HLA-DRA PE=1 SV=2	Color2 [DarkGray]	1	4		24.6481	25.1073	25.1168	19.1448	17.7303	18.7977
+	2.40635	4.60922	K.RSN[+3081.095]YTPITNVPPEVTVLTNSPVELR.E	HexNAc(6)Hex(7)Fuc(1)NeuAc(2)	N[+3081]	>sp|P01903|DRA_HUMAN HLA class II histocompatibility antigen, DR alpha chain OS=Homo sapiens OX=9606 GN=HLA-DRA PE=1 SV=2	Color2 [DarkGray]	1	4		24.4478	25.2382	24.7392	18.7797	20.578	21.2399
	1.09118	1.59917	K.RSN[+3372.190]YTPITNVPPEVTVLTNSPVELR.E	HexNAc(6)Hex(7)Fuc(1)NeuAc(3)	N[+3372]	>sp|P01903|DRA_HUMAN HLA class II histocompatibility antigen, DR alpha chain OS=Homo sapiens OX=9606 GN=HLA-DRA PE=1 SV=2	Color2 [DarkGray]	1	4		20.2129	22.3458	21.1281	19.7842	19.0412	20.064
+	2.68237	2.49895	K.RSN[+3446.227]YTPITNVPPEVTVLTNSPVELR.E	HexNAc(7)Hex(8)Fuc(1)NeuAc(2)	N[+3446]	>sp|P01903|DRA_HUMAN HLA class II histocompatibility antigen, DR alpha chain OS=Homo sapiens OX=9606 GN=HLA-DRA PE=1 SV=2	Color2 [DarkGray]	1	4		22.2182	22.5136	22.4485	19.3574	20.5251	19.8008
+	2.21217	4.94161	K.SAEGTFFIN[+1540.529]K.T	HexNAc(2)Hex(7)	N[+1541]	>sp|P06865|HEXA_HUMAN Beta-hexosaminidase subunit alpha OS=Homo sapiens OX=9606 GN=HEXA PE=1 SV=2	Color2 [DarkGray]	1	4		23.5739	22.4958	25.4417	18.8869	19.5306	18.2692
	1.36836	4.00545	K.SAEGTFFIN[+1702.581]K.T	HexNAc(2)Hex(8)	N[+1703]	>sp|P06865|HEXA_HUMAN Beta-hexosaminidase subunit alpha OS=Homo sapiens OX=9606 GN=HEXA PE=1 SV=2	Color2 [DarkGray]	1	4		25.8838	23.3881	24.5629	19.7359	22.9068	19.1758
	0.516173	1.43206	K.SAEGTFFIN[+2424.867]K.T	HexNAc(5)Hex(6)Fuc(1)NeuAc(1)	N[+2425]	>sp|P06865|HEXA_HUMAN Beta-hexosaminidase subunit alpha OS=Homo sapiens OX=9606 GN=HEXA PE=1 SV=2	Color2 [DarkGray]	1	4		21.1192	19.1981	23.2615	20.1133	20.0543	19.1151
	1.75753	1.73966	K.SAFDPPDIPVC[+57.021]LLGN[+1702.581]R.T	HexNAc(2)Hex(8)	C[+57], N[+1703]	>sp|Q9Y666|S12A7_HUMAN Solute carrier family 12 member 7 OS=Homo sapiens OX=9606 GN=SLC12A7 PE=1 SV=3	Color2 [DarkGray]	1	4		20.4717	20.2394	19.3421	18.4205	18.6807	17.7329
	0.101734	0.20491	K.SAFDPPDIPVC[+57.021]LLGN[+1864.634]R.T	HexNAc(2)Hex(9)	C[+57], N[+1865]	>sp|Q9Y666|S12A7_HUMAN Solute carrier family 12 member 7 OS=Homo sapiens OX=9606 GN=SLC12A7 PE=1 SV=3	Color2 [DarkGray]	1	4		22.6351	20.9585	20.7635	21.7188	20.423	21.6007
+	4.24258	6.09661	K.SAPPSQVWN[+2424.867]MTVSMTSDNSMHVK.C	HexNAc(5)Hex(6)Fuc(1)NeuAc(1)	N[+2425]	>sp|P08575|PTPRC_HUMAN Receptor-type tyrosine-protein phosphatase C OS=Homo sapiens OX=9606 GN=PTPRC PE=1 SV=3	Color2 [DarkGray]	1	4		25.0504	25.5115	25.8574	19.2841	19.0013	19.844
+	2.47699	5.32391	K.SAPPSQVWN[+2715.963]MTVSMTSDNSMHVK.C	HexNAc(5)Hex(6)Fuc(1)NeuAc(2)	N[+2716]	>sp|P08575|PTPRC_HUMAN Receptor-type tyrosine-protein phosphatase C OS=Homo sapiens OX=9606 GN=PTPRC PE=1 SV=3	Color2 [DarkGray]	1	4		24.7861	25.2117	25.1656	18.8285	21.4102	18.953
	0.0366928	0.0492789	K.SC[+57.021]GEC[+57.021]IQAGPNC[+57.021]GWC[+57.021]TN[+1540.529]STFLQEGMPTSAR.C	HexNAc(2)Hex(7)	C[+57]*4, N[+1541]	>sp|P05556|ITB1_HUMAN Integrin beta-1 OS=Homo sapiens OX=9606 GN=ITGB1 PE=1 SV=2	Color2 [DarkGray]	1	4		19.404	20.6445	19.1952	19.6615	19.7974	19.6369
	0.162038	0.21555	K.SC[+57.021]GEC[+57.021]IQAGPNC[+57.021]GWC[+57.021]TN[+1702.581]STFLQEGMPTSAR.C	HexNAc(2)Hex(8)	C[+57]*4, N[+1703]	>sp|P05556|ITB1_HUMAN Integrin beta-1 OS=Homo sapiens OX=9606 GN=ITGB1 PE=1 SV=2	Color2 [DarkGray]	1	4		21.6006	22.2112	21.9171	22.1658	22.1581	20.7584
	0.3957	-0.794034	K.SC[+57.021]GEC[+57.021]IQAGPNC[+57.021]GWC[+57.021]TN[+1864.634]STFLQEGMPTSAR.C	HexNAc(2)Hex(9)	C[+57]*4, N[+1865]	>sp|P05556|ITB1_HUMAN Integrin beta-1 OS=Homo sapiens OX=9606 GN=ITGB1 PE=1 SV=2	Color2 [DarkGray]	1	4		18.7518	21.2987	21.1501	20.9481	21.0563	21.5783
	0.24465	-0.733268	K.SC[+57.021]GEC[+57.021]IQAGPNC[+57.021]GWC[+57.021]TN[+1913.677]STFLQEGMPTSAR.C	HexNAc(4)Hex(5)NeuAc(1)	C[+57]*4, N[+1914]	>sp|P05556|ITB1_HUMAN Integrin beta-1 OS=Homo sapiens OX=9606 GN=ITGB1 PE=1 SV=2	Color2 [DarkGray]	1	4		19.751	21.0041	18.3707	21.614	18.6551	21.0566
	0.606718	-2.37075	K.SDAVSHTGN[+1403.507]YTC[+57.021]EVTELTR.E	HexNAc(3)Hex(4)Fuc(1)	C[+57], N[+1404]	>sp|Q08722|CD47_HUMAN Leukocyte surface antigen CD47 OS=Homo sapiens OX=9606 GN=CD47 PE=1 SV=1	Color2 [DarkGray]	1	4		20.4006	19.0547	19.098	23.9399	18.5255	23.2002
+	4.48494	-5.41138	K.SDAVSHTGN[+1565.560]YTC[+57.021]EVTELTR.E	HexNAc(3)Hex(5)Fuc(1)	C[+57], N[+1566]	>sp|Q08722|CD47_HUMAN Leukocyte surface antigen CD47 OS=Homo sapiens OX=9606 GN=CD47 PE=1 SV=1	Color2 [DarkGray]	1	4		18.917	19.7259	19.3532	24.7257	24.9589	24.5456
	0.265531	-0.419392	K.SDAVSHTGN[+1606.587]YTC[+57.021]EVTELTR.E	HexNAc(4)Hex(4)Fuc(1)	C[+57], N[+1607]	>sp|Q08722|CD47_HUMAN Leukocyte surface antigen CD47 OS=Homo sapiens OX=9606 GN=CD47 PE=1 SV=1	Color2 [DarkGray]	1	4		19.2364	18.4445	18.5393	20.3132	18.4886	18.6766
+	2.13564	-3.43841	K.SDAVSHTGN[+1622.582]YTC[+57.021]EVTELTR.E	HexNAc(4)Hex(5)	C[+57], N[+1623]	>sp|Q08722|CD47_HUMAN Leukocyte surface antigen CD47 OS=Homo sapiens OX=9606 GN=CD47 PE=1 SV=1	Color2 [DarkGray]	1	4		19.5423	19.7098	20.0831	24.5285	22.743	22.3789
	2.50039	-1.77751	K.SDAVSHTGN[+1768.640]YTC[+57.021]EVTELTR.E	HexNAc(4)Hex(5)Fuc(1)	C[+57], N[+1769]	>sp|Q08722|CD47_HUMAN Leukocyte surface antigen CD47 OS=Homo sapiens OX=9606 GN=CD47 PE=1 SV=1	Color2 [DarkGray]	1	4		23.6705	22.9801	23.8544	25.1076	25.3355	25.3944
+	2.37564	-4.84594	K.SDAVSHTGN[+1784.634]YTC[+57.021]EVTELTR.E	HexNAc(4)Hex(6)	C[+57], N[+1785]	>sp|Q08722|CD47_HUMAN Leukocyte surface antigen CD47 OS=Homo sapiens OX=9606 GN=CD47 PE=1 SV=1	Color2 [DarkGray]	1	4		18.44	19.1811	20.4245	25.1894	24.2427	23.1513
	0.357959	-1.90919	K.SDAVSHTGN[+1930.692]YTC[+57.021]EVTELTR.E	HexNAc(4)Hex(6)Fuc(1)	C[+57], N[+1931]	>sp|Q08722|CD47_HUMAN Leukocyte surface antigen CD47 OS=Homo sapiens OX=9606 GN=CD47 PE=1 SV=1	Color2 [DarkGray]	1	4		19.5762	18.8625	19.4023	25.6112	18.9202	19.0371
+	3.72777	-6.70629	K.SELVN[+1216.423]ETR.W	HexNAc(2)Hex(5)	N[+1216]	>sp|Q9UGT4|SUSD2_HUMAN Sushi domain-containing protein 2 OS=Homo sapiens OX=9606 GN=SUSD2 PE=1 SV=1	Color2 [DarkGray]	1	4		19.8817	19.338	19.0373	26.8108	26.2645	25.3006
+	4.63711	-8.56213	K.SELVN[+1378.476]ETR.W	HexNAc(2)Hex(6)	N[+1378]	>sp|Q9UGT4|SUSD2_HUMAN Sushi domain-containing protein 2 OS=Homo sapiens OX=9606 GN=SUSD2 PE=1 SV=1	Color2 [DarkGray]	1	4		18.3469	19.4969	18.4191	27.4354	27.1648	27.3491
+	3.62699	-4.00474	K.SELVN[+1419.502]ETR.W	HexNAc(3)Hex(5)	N[+1420]	>sp|Q9UGT4|SUSD2_HUMAN Sushi domain-containing protein 2 OS=Homo sapiens OX=9606 GN=SUSD2 PE=1 SV=1	Color2 [DarkGray]	1	4		19.0919	19.9835	19.9561	23.9275	23.4826	23.6357
	0.827173	-4.88412	K.SELVN[+1540.529]ETR.W	HexNAc(2)Hex(7)	N[+1541]	>sp|Q9UGT4|SUSD2_HUMAN Sushi domain-containing protein 2 OS=Homo sapiens OX=9606 GN=SUSD2 PE=1 SV=1	Color2 [DarkGray]	1	4		20.6404	19.588	19.603	19.4307	28.0349	27.0181
	0.861861	-2.80352	K.SELVN[+1581.555]ETR.W	HexNAc(3)Hex(6)	N[+1582]	>sp|Q9UGT4|SUSD2_HUMAN Sushi domain-containing protein 2 OS=Homo sapiens OX=9606 GN=SUSD2 PE=1 SV=1	Color2 [DarkGray]	1	4		24.8945	25.219	20.5341	26.4999	26.2207	26.3375
	0.357664	1.8185	K.SELVN[+1710.598]ETR.W	HexNAc(3)Hex(5)NeuAc(1)	N[+1711]	>sp|Q9UGT4|SUSD2_HUMAN Sushi domain-containing protein 2 OS=Homo sapiens OX=9606 GN=SUSD2 PE=1 SV=1	Color2 [DarkGray]	1	4		24.0763	24.7954	19.6538	21.3884	23.2071	18.4745
	0.0325739	0.284415	K.SELVN[+1872.651]ETR.W	HexNAc(3)Hex(6)NeuAc(1)	N[+1873]	>sp|Q9UGT4|SUSD2_HUMAN Sushi domain-containing protein 2 OS=Homo sapiens OX=9606 GN=SUSD2 PE=1 SV=1	Color2 [DarkGray]	1	4		25.8449	20.3404	19.7751	26.0383	18.6991	20.3697
	0.630926	-4.2539	K.SGVFN[+1540.529]VSELVRVSR.T	HexNAc(2)Hex(7)	N[+1541]	>sp|O00712|NFIB_HUMAN Nuclear factor 1 B-type OS=Homo sapiens OX=9606 GN=NFIB PE=1 SV=2	Color2 [DarkGray]	1	4		18.2998	18.5314	17.9422	20.5612	18.5139	28.4599
	0.77615	1.70065	K.SHGC[+57.021]TAEGLC[+57.021]C[+57.021]HSEC[+57.021]LGN[+1378.476]C[+57.021]SQPDDPTK.C	HexNAc(2)Hex(6)	C[+57]*5, N[+1378]	>sp|P06213|INSR_HUMAN Insulin receptor OS=Homo sapiens OX=9606 GN=INSR PE=1 SV=4	Color2 [DarkGray]	1	4		19.7422	22.3021	19.9253	20.0909	18.6197	18.157
	0.262422	-0.553273	K.SHGC[+57.021]TAEGLC[+57.021]C[+57.021]HSEC[+57.021]LGN[+1540.529]C[+57.021]SQPDDPTK.C	HexNAc(2)Hex(7)	C[+57]*5, N[+1541]	>sp|P06213|INSR_HUMAN Insulin receptor OS=Homo sapiens OX=9606 GN=INSR PE=1 SV=4	Color2 [DarkGray]	1	4		18.2825	20.5566	19.8976	19.9072	19.3996	21.0896
	0.154449	0.393035	K.SHGC[+57.021]TAEGLC[+57.021]C[+57.021]HSEC[+57.021]LGN[+1702.581]C[+57.021]SQPDDPTK.C	HexNAc(2)Hex(8)	C[+57]*5, N[+1703]	>sp|P06213|INSR_HUMAN Insulin receptor OS=Homo sapiens OX=9606 GN=INSR PE=1 SV=4	Color2 [DarkGray]	1	4		20.0128	21.1499	19.1704	20.1143	18.2504	20.7891
	0.799231	1.6456	K.SISEN[+1702.581]ATATAAPK.M	HexNAc(2)Hex(8)	N[+1703]	>sp|Q9UBS9|SUCO_HUMAN SUN domain-containing ossification factor OS=Homo sapiens OX=9606 GN=SUCO PE=1 SV=1	Color2 [DarkGray]	1	4		22.2459	18.9906	20.6261	18.6872	19.1862	19.0523
	0.224258	-1.15436	K.SLGNVN[+1216.423]FTVSAEALESQELC[+57.021]GTEVPSVPEHGR.K	HexNAc(2)Hex(5)	C[+57], N[+1216]	>sp|P01023|A2MG_HUMAN Alpha-2-macroglobulin OS=Homo sapiens OX=9606 GN=A2M PE=1 SV=3	Color2 [DarkGray]	1	4		23.3366	19.1762	20.8624	19.0704	24.0552	23.7127
	0.400523	1.53698	K.SLGNVN[+1378.476]FTVSAEALESQELC[+57.021]GTEVPSVPEHGR.K	HexNAc(2)Hex(6)	C[+57], N[+1378]	>sp|P01023|A2MG_HUMAN Alpha-2-macroglobulin OS=Homo sapiens OX=9606 GN=A2M PE=1 SV=3	Color2 [DarkGray]	1	4		22.8596	22.6913	22.8345	18.0234	23.1203	22.6307
	1.36367	1.73487	K.SLGNVN[+1419.502]FTVSAEALESQELC[+57.021]GTEVPSVPEHGR.K	HexNAc(3)Hex(5)	C[+57], N[+1420]	>sp|P01023|A2MG_HUMAN Alpha-2-macroglobulin OS=Homo sapiens OX=9606 GN=A2M PE=1 SV=3	Color2 [DarkGray]	1	4		19.7953	20.6915	20.4403	19.6321	17.9644	18.126
	0.0314384	0.113619	K.SLGNVN[+1540.529]FTVSAEALESQELC[+57.021]GTEVPSVPEHGR.K	HexNAc(2)Hex(7)	C[+57], N[+1541]	>sp|P01023|A2MG_HUMAN Alpha-2-macroglobulin OS=Homo sapiens OX=9606 GN=A2M PE=1 SV=3	Color2 [DarkGray]	1	4		21.6749	18.8733	17.7273	19.6347	19.6485	18.6516
	0.251723	-1.15061	K.SLGNVN[+1548.545]FTVSAEALESQELC[+57.021]GTEVPSVPEHGR.K	HexNAc(3)Hex(4)NeuAc(1)	C[+57], N[+1549]	>sp|P01023|A2MG_HUMAN Alpha-2-macroglobulin OS=Homo sapiens OX=9606 GN=A2M PE=1 SV=3	Color2 [DarkGray]	1	4		19.9063	19.5924	19.232	17.3104	23.43	21.4423
	0.646445	-1.72721	K.SLGNVN[+1581.555]FTVSAEALESQELC[+57.021]GTEVPSVPEHGR.K	HexNAc(3)Hex(6)	C[+57], N[+1582]	>sp|P01023|A2MG_HUMAN Alpha-2-macroglobulin OS=Homo sapiens OX=9606 GN=A2M PE=1 SV=3	Color2 [DarkGray]	1	4		22.7151	19.3398	21.5669	24.2845	22.5027	22.0161
	1.54238	-1.09172	K.SLGNVN[+1710.598]FTVSAEALESQELC[+57.021]GTEVPSVPEHGR.K	HexNAc(3)Hex(5)NeuAc(1)	C[+57], N[+1711]	>sp|P01023|A2MG_HUMAN Alpha-2-macroglobulin OS=Homo sapiens OX=9606 GN=A2M PE=1 SV=3	Color2 [DarkGray]	1	4		21.7926	21.2956	22.3978	23.0372	22.929	22.795
	0.729752	-1.07726	K.SLGNVN[+1751.624]FTVSAEALESQELC[+57.021]GTEVPSVPEHGR.K	HexNAc(4)Hex(4)NeuAc(1)	C[+57], N[+1752]	>sp|P01023|A2MG_HUMAN Alpha-2-macroglobulin OS=Homo sapiens OX=9606 GN=A2M PE=1 SV=3	Color2 [DarkGray]	1	4		21.706	20.6964	20.5158	21.3694	23.173	21.6076
	0.60718	-0.19917	K.SLGNVN[+1864.634]FTVSAEALESQELC[+57.021]GTEVPSVPEHGR.K	HexNAc(2)Hex(9)	C[+57], N[+1865]	>sp|P01023|A2MG_HUMAN Alpha-2-macroglobulin OS=Homo sapiens OX=9606 GN=A2M PE=1 SV=3	Color2 [DarkGray]	1	4		21.772	21.9812	21.9636	21.8789	22.1029	22.3324
	0.590091	0.987614	K.SLGNVN[+1872.651]FTVSAEALESQELC[+57.021]GTEVPSVPEHGR.K	HexNAc(3)Hex(6)NeuAc(1)	C[+57], N[+1873]	>sp|P01023|A2MG_HUMAN Alpha-2-macroglobulin OS=Homo sapiens OX=9606 GN=A2M PE=1 SV=3	Color2 [DarkGray]	1	4		23.5426	23.1196	23.3596	22.9495	23.2231	20.8865
+	3.30432	-5.07508	K.SLGNVN[+1913.677]FTVSAEALESQELC[+57.021]GTEVPSVPEHGR.K	HexNAc(4)Hex(5)NeuAc(1)	C[+57], N[+1914]	>sp|P01023|A2MG_HUMAN Alpha-2-macroglobulin OS=Homo sapiens OX=9606 GN=A2M PE=1 SV=3	Color2 [DarkGray]	1	4		19.7456	19.5268	20.9482	24.7185	25.354	25.3734
	1.20702	-2.01316	K.SLTFN[+1872.651]ETYQDISELVYGAK.L	HexNAc(3)Hex(6)NeuAc(1)	N[+1873]	>sp|P01008|ANT3_HUMAN Antithrombin-III OS=Homo sapiens OX=9606 GN=SERPINC1 PE=1 SV=1	Color2 [DarkGray]	1	4		19.9589	18.1982	18.9415	20.8933	22.1443	20.1004
+	3.06481	-4.94862	K.SLTFN[+1913.677]ETYQDISELVYGAK.L	HexNAc(4)Hex(5)NeuAc(1)	N[+1914]	>sp|P01008|ANT3_HUMAN Antithrombin-III OS=Homo sapiens OX=9606 GN=SERPINC1 PE=1 SV=1	Color2 [DarkGray]	1	4		19.8978	19.7779	18.8778	23.5692	24.9606	24.8696
	1.40498	-5.48937	K.SLTFN[+2204.772]ETYQDISELVYGAK.L	HexNAc(4)Hex(5)NeuAc(2)	N[+2205]	>sp|P01008|ANT3_HUMAN Antithrombin-III OS=Homo sapiens OX=9606 GN=SERPINC1 PE=1 SV=1	Color2 [DarkGray]	1	4		18.9306	24.1971	24.2471	28.5265	28.2579	27.0585
	0.218969	0.328909	K.SLTFN[+2350.830]ETYQDISELVYGAK.L	HexNAc(4)Hex(5)Fuc(1)NeuAc(2)	N[+2351]	>sp|P01008|ANT3_HUMAN Antithrombin-III OS=Homo sapiens OX=9606 GN=SERPINC1 PE=1 SV=1	Color2 [DarkGray]	1	4		19.0049	19.0761	20.2413	18.3973	19.0668	19.8716
	0.614252	1.33463	K.SLTTSLHN[+1378.476]K.T	HexNAc(2)Hex(6)	N[+1378]	>sp|Q92673|SORL_HUMAN Sortilin-related receptor OS=Homo sapiens OX=9606 GN=SORL1 PE=1 SV=2	Color2 [DarkGray]	1	4		22.3533	19.0818	20.1005	19.1816	19.4036	18.9465
	0.932643	1.9319	K.SLTTSLHN[+1540.529]K.T	HexNAc(2)Hex(7)	N[+1541]	>sp|Q92673|SORL_HUMAN Sortilin-related receptor OS=Homo sapiens OX=9606 GN=SORL1 PE=1 SV=2	Color2 [DarkGray]	1	4		19.5165	20.4517	22.6015	18.7847	18.4503	19.5389
[truncated: 3,283 more rows]

## Sheet: GO analysis
Category	Term	Count	%	PValue	Genes	List Total	Pop Hits	Pop Total	Fold Enrichment	Bonferroni	Benjamini	FDR
[truncated: 452 more rows]
